# Supplementary material for: Single-Cell RNA-seq Identifies Cell Subsets in Human Placenta That Highly Expresses Factors Driving Pathogenesis of SARS-CoV-2
Source: Front Cell Dev Biol. 2020 Aug 19;8:783. doi: 10.3389/fcell.2020.00783 (PMC7466449; doi:10.3389/fcell.2020.00783)
Supplement: Supplementary file 10 [file Table_4.xls]

## Sheet: 1st Trimester STB
Supplementary Table 4: Differentially abundant genes in ACE2+ TMPRSS2+ and ACE2- TMPRSS2- cells of first trimester STB. Data is from Liu et al 2018 (Accession number GSE89497).
Gene	ACE2-TMPRSS2- 1	ACE2-TMPRSS2- 2	ACE2-TMPRSS2- 3	ACE2-TMPRSS2- 4	ACE2-TMPRSS2- 5	ACE2-TMPRSS2- 6	ACE2-TMPRSS2- 7	ACE2-TMPRSS2- 8	ACE2-TMPRSS2- 9	ACE2-TMPRSS2- 10	ACE2-TMPRSS2- 11	ACE2-TMPRSS2- 12	ACE2-TMPRSS2- 13	ACE2-TMPRSS2- 14	ACE2-TMPRSS2- 15	ACE2-TMPRSS2- 16	ACE2-TMPRSS2- 17	ACE2-TMPRSS2- 18	ACE2-TMPRSS2- 19	ACE2-TMPRSS2- 20	ACE2-TMPRSS2- 21	ACE2-TMPRSS2- 22	ACE2-TMPRSS2- 23	ACE2-TMPRSS2- 24	ACE2-TMPRSS2- 25	ACE2-TMPRSS2- 26	ACE2-TMPRSS2- 27	ACE2-TMPRSS2- 28	ACE2-TMPRSS2- 29	ACE2-TMPRSS2- 30	ACE2-TMPRSS2- 31	ACE2-TMPRSS2- 32	ACE2-TMPRSS2- 33	ACE2+TMPRSS2+ 1	ACE2+TMPRSS2+ 2	ACE2+TMPRSS2+ 3	ACE2+TMPRSS2+ 4	ACE2+TMPRSS2+ 5	ACE2+TMPRSS2+ 6	ACE2+TMPRSS2+ 7	ACE2+TMPRSS2+ 8	ACE2+TMPRSS2+ 9
ACE2	0	0	0	0	0	0	0	0	0	0	0	0	0	0	0	0	0	0	0	0	0	0	0	0	0	0	0	0	0	0	0	0	0	0.61	1.3	1.5	2.9	3.23	5.11	5.54	6.12	6.42
TMPRSS2	0	0	0	0	0	0	0	0	0	0	0	0	0	0	0	0	0	0	0	0	0	0	0	0	0	0	0	0	0	0	0	0	0	16.56	2.6	7.5	1.45	4.31	2.56	2.77	4.08	1.17
LOC101927751	0.77	0	0	0	0	0	0	0	0	0	0	0	0	0	0	0	0	0	0	0	0	0	0	0	0	0	0	0	0	0	0	0	0	5.52	1.3	0	0	2.16	3.41	5.54	0	0
USP46-AS1	0	0	0	0	2.4	0	0	0	0	0	0	0	0	0	0	0	0	0	0	1.55	0	0	0	0	0	0	0	0	0	0	0	0	0	0	5.21	0	0	3.23	2.56	5.54	0	1.75
PANK1	0	1.01	0.43	2.18	0	0	0	0	0	0	0	0	0	0	0	0	2.1	0	0	0	1.58	0	0	0	0	0	0	0	0	0	0	0	0	3.07	0	6	1.45	6.47	0.85	5.54	0	2.92
SLC13A3	0	2.02	0	0	0	0	0	0	0	0	0	0	0	0	0	0	1.05	0	0	0	0	0	0	0	0	0	0	0	0	0	0	0	0	0.61	3.91	0	0	2.16	1.7	0	1.02	1.17
USP27X-AS1	0.77	0	0	0.73	2.4	0	0	1.89	0	0	0	0	0	6.16	0	0	0	0	0	0	0	0	0	0	0	0	0	0	0	0	0	0	0.61	4.91	5.21	0	0	5.39	11.07	0	9.17	2.92
TRPM4	0.77	0	2.16	0	0	0	0	0	0	0	0	0	0	0	0	0	0	3.63	0	1.55	0	1.87	0	0	0	0	0	0	0	0	0	0	0	4.91	1.3	0	0	0	5.11	2.77	12.23	2.92
VSIG2	0	0	1.73	2.18	0	3.37	0	0	0	0	0	0	0	0	0	0	0	0	0	0	0	0	0	0	0	0	0	0	0	0	0	0	0	5.52	0	0	4.34	4.31	0.85	2.77	0	2.92
TMPRSS3	0	3.02	2.59	0.73	7.2	0	0	0	0	0	0	0	0	0	0	0	10.48	0	0	0	0	0	0	0	0	1.16	0	0	0	0	0	0	5.45	19.63	0	0	10.14	3.23	12.78	30.48	0	7.01
KLB	0	3.02	6.05	0	2.4	2.24	0	0.94	0	0	2.24	0	0	0	0	0	5.24	0	0	0	0	0	0	0	4.85	0	0	0	0	0	0	0	0	13.5	0	3	11.59	6.47	3.41	19.4	6.12	7.59
MGST1	0	4.03	0.86	3.64	1.2	0	0	0	0	0	0	0	0	0	0	0	1.05	0	0	3.09	0	13.11	34.85	0	0	0	0	0	0	0	0	0	0.61	1.84	14.33	28.5	0	5.39	15.33	30.48	58.1	7.01
GALNT10	0	0	0	0	0	0	0	0	0	0	0	7.48	0	0	0	0	0	0	0	0	0	0	0	0	0	0	0	0	0	1.44	0	0	0	4.91	0	3	7.24	0	2.56	2.77	0	1.17
MAGEA10	4.6	2.02	12.09	11.63	0	11.22	0	11.32	7.73	0	0	0	0	0	6.21	0	0	0	0	7.73	0	0	0	0	0	1.16	0	0	0	0	0	0	1.82	58.28	0	4.5	0	0	18.74	47.11	26.5	25.69
ZNF628	2.3	0	2.16	0	0	0	0	0	0	0	0	0	0	0	0	0	0	0	0	0	0	0	0	0	0	0	0	0	0	0	0	0	1.21	1.84	2.6	0	0	3.23	0	0	1.02	3.5
BTG2	8.43	9.07	56.15	2.91	41.97	4.49	2.15	5.66	23.18	0	4.47	0	0	0	3.11	0	1.05	18.16	0	10.83	1.58	14.98	30.49	0	4.85	0	0	0	0	5.74	0	23.14	10.89	31.28	19.54	120	8.69	17.24	209.55	85.9	13.25	75.31
SLC2A9	0	0	1.73	0	0	0	0	0	0	0	2.24	0	3.91	0	3.11	0	1.05	0	0	0	0	1.87	0	0	0	0	0	0	0	0	0	0	0.61	0	6.51	3	0	0	7.67	8.31	3.06	0
PPP1R16B	1.53	1.01	0	0	0	0	0	0	0	0	0	0	0	0	0	0	0	0	0	0	0	1.87	0	0	0	0	0	0	0	0	0	0	7.87	0	2.6	0	4.34	0	5.96	2.77	8.15	0
ZNF763	1.53	0	0.86	1.45	0	0	0	0.94	0	0	0	0	0	0	0	0	0	0	0	0	0	1.87	4.36	0	0	2.33	0	0	0	0	0	0	4.84	9.2	10.42	0	2.9	2.16	1.7	0	0	7.59
LINC00882	0	0	0	5.09	16.79	0	0	1.89	0	0	5.96	0	0	0	0	0	0	0	0	0	0	0	0	0	0	0	0	0	0	2.87	0	0	1.21	9.2	7.81	0	1.45	1.08	4.26	5.54	24.46	9.34
OTOGL	3.07	0	0	3.64	0	0	0	4.72	0	0	0.75	0	0	0	0	0	2.1	0	0	3.09	4.73	0	0	0	0	2.33	0	0	0	1.44	0	0	2.42	8.59	0	4.5	5.79	7.54	8.52	11.08	3.06	2.92
LINC00431	7.67	0	4.75	0	2.4	0	0	0	0	0	0	0	0	0	0	0	0	0	0	3.09	0	1.87	0	0	0	0	0	0	0	0	0	0	2.42	2.45	7.81	0	0	5.39	2.56	8.31	12.23	0.58
NRCAM	3.07	1.01	0.43	2.18	0	1.12	2.15	0	0	0	0	0	0	0	0	0	2.1	0	0	0	0	0	0	0	0	0	0	0	0	0	0	0	0	0.61	0	4.5	2.9	2.16	1.7	0	3.06	6.42
PBLD	0.77	0	0.86	0	0	0	0	0	7.73	0	0	0	0	0	0	0	0	0	0	0	0	0	0	0	0	0	1.98	0	0	0	0	0	0	4.29	2.6	1.5	2.9	1.08	2.56	2.77	0	2.34
ALDH1A3	0	1.01	0.43	5.09	2.4	0	0	4.72	0	0	6.71	0	0	0	0	0	3.14	0	0	0	0	1.87	0	0	0	0	1.98	0	0	1.44	0	0	1.21	2.45	16.93	0	0	6.47	10.22	11.08	1.02	4.67
SPDYC	1.53	12.1	20.3	8	28.78	5.61	6.45	9.43	15.45	0	4.47	7.48	19.54	0	3.11	0	1.05	3.63	0	9.28	0	26.21	4.36	0	0	0	0	0	0	8.61	0	7.71	5.45	14.72	22.14	108	0	4.31	46.85	121.93	10.19	36.78
KCTD17	0	0	2.59	1.45	1.2	1.12	0	0.94	0	0	0	0	0	0	0	0	0	0	0	0	1.58	0	0	0	0	0	0	0	0	0	0	0	0.61	1.84	0	0	0	4.31	2.56	5.54	0	2.34
RIN3	1.53	0	2.59	0.73	0	1.12	2.15	2.83	0	0	3.73	0	0	0	0	0	6.29	0	0	0	0	0	0	0	0	1.16	1.98	0	0	0	0	0	3.03	4.29	3.91	6	7.24	0	5.11	8.31	4.08	5.25
KCNK5	0.77	2.02	0.86	0.73	0	7.86	0	0	0	0	0	0	0	0	0	0	0	0	0	0	1.58	0	0	0	0	0	0	0	0	0	0	0	0	4.29	2.6	0	0	0	1.7	5.54	5.1	2.92
LAMA3	3.07	8.06	0.86	10.18	1.2	0	0	2.83	0	0	0	0	0	0	0	0	4.19	0	0	1.55	0	0	0	0	0	0	0	0	0	0	0	0	4.84	8.59	5.21	0	0	8.62	0.85	2.77	13.25	18.68
C11orf91	2.3	0	15.55	4.36	7.2	12.35	4.3	1.89	7.73	0	2.98	0	0	0	0	2.84	0	0	0	4.64	0	9.36	21.78	0	0	0	0	0	0	4.31	0	0	5.45	17.18	0	0	23.17	7.54	40.04	13.86	58.1	8.17
LINC01483	6.13	0	4.75	5.09	6	4.49	0	3.77	15.45	0	0	0	0	0	0	0	0	0	0	0	0	0	0	0	0	0	0	0	0	0	0	0	10.29	22.08	19.54	0	1.45	0	11.07	0	14.27	12.84
GRIK1-AS2	6.13	36.29	42.76	75.62	47.97	14.59	49.47	29.25	0	0	4.47	0	3.91	10.26	3.11	0	2.1	3.63	81.87	13.92	7.88	9.36	0	0	0	1.16	0	9.55	0	7.18	0	0	39.93	209.18	3.91	52.5	8.69	80.82	32.37	80.36	161.06	88.15
SCNN1B	6.13	3.02	3.89	13.81	4.8	1.12	10.75	21.7	0	0	2.98	0	0	0	0	0	4.19	0	0	12.38	14.18	7.49	0	0	0	1.16	0	0	0	0	0	0	9.08	36.19	16.93	12	5.79	37.72	9.37	0	25.48	23.35
ICA1	5.37	0	3.02	2.91	6	0	0	4.72	0	0	3.73	0	3.91	0	0	8.51	1.05	0	0	0	1.58	0	0	0	0	3.49	0	0	0	11.48	0	0	1.82	22.7	3.91	3	0	0	20.44	16.63	10.19	4.09
EID2	0	0	4.75	1.45	4.8	0	0	0	0	0	1.49	0	0	0	9.32	0	0	0	0	0	0	0	0	0	0	0	0	0	0	0	0	0	2.42	5.52	7.81	0	0	4.31	1.7	11.08	0	2.92
KCNK3	0	0	0.43	3.64	3.6	1.12	0	0	0	0	0	0	0	0	0	0	2.1	0	0	1.55	0	0	0	0	0	0	0	0	0	0	0	0	2.42	3.07	0	0	2.9	4.31	0	0	6.12	3.5
ETNK2	0	0	1.3	2.18	0	0	0	0	0	0	2.24	0	0	0	9.32	11.34	0	0	0	0	1.58	1.87	0	0	0	0	0	0	0	0	0	0	0	8.59	3.91	0	0	1.08	2.56	8.31	4.08	10.51
DNAJC30	4.6	1.01	10.8	0	13.19	1.12	2.15	2.83	7.73	0	2.98	0	0	2.05	9.32	5.67	6.29	7.27	0	1.55	4.73	0	0	0	0	5.81	9.9	0	0	0	0	0	10.29	20.86	5.21	4.5	4.34	6.47	13.63	41.57	35.68	9.92
SIRPA	0.77	1.01	0	1.45	1.2	3.37	0	0.94	0	0	0	0	0	0	0	0	2.1	0	0	1.55	0	0	0	0	0	0	0	3.18	0	4.31	0	0	0.61	2.45	1.3	0	1.45	5.39	0.85	0	7.14	7.59
SCAMP1-AS1	1.53	2.02	4.32	5.09	0	0	0	0	0	0	1.49	0	0	0	0	0	0	0	0	4.64	1.58	0	0	0	0	2.33	0	0	0	0	0	7.71	7.26	13.5	10.42	0	1.45	3.23	3.41	8.31	3.06	4.09
C6orf52	0.77	0	0	0	9.59	0	0	0	0	0	0	0	0	2.05	0	0	0	0	0	1.55	0	0	0	0	0	3.49	0	0	0	0	0	0	0	4.91	1.3	4.5	0	0	2.56	0	6.12	2.34
MAPKAPK3	0	7.06	6.91	2.91	1.2	1.12	2.15	1.89	0	0	0	0	0	0	0	0	3.14	0	0	9.28	0	1.87	0	0	0	0	0	3.18	0	0	0	0	6.05	8.59	6.51	0	0	0	2.56	16.63	14.27	9.34
CSHL1	27.6	19.15	440.14	163.6	45.57	59.49	47.32	150.94	108.16	0	20.13	0	3.91	26.68	0	5.67	0	0	0	179.45	0	0	0	0	0	0	3.96	0	0	5.74	0	0	194.21	436.76	1.3	1.5	104.28	549.6	71.55	246.63	220.18	207.24
PAGE4	6.9	7.06	12.53	35.63	64.76	3.37	32.26	42.45	38.63	0	0	0	0	0	3.11	0	3.14	0	0	4.64	0	29.96	0	0	0	0	0	0	0	1.44	0	0	18.76	44.17	31.26	9	18.83	62.5	24.7	24.94	90.72	61.88
RHOV	0	11.09	4.75	2.91	3.6	1.12	15.06	0.94	15.45	0	5.22	0	3.91	0	0	5.67	3.14	3.63	0	4.64	1.58	5.62	0	0	0	0	0	0	0	0	0	0	4.24	12.27	2.6	1.5	7.24	12.93	5.11	33.25	24.46	11.68
HEATR1	1.53	0	2.59	0	8.39	1.12	0	1.89	0	0	0.75	0	0	2.05	0	0	8.38	0	0	0	0	0	0	0	0	1.16	1.98	0	0	1.44	0	0	0	7.97	6.51	0	7.24	2.16	5.11	0	5.1	2.92
FADS1	11.5	0	4.32	10.91	6	0	8.6	1.89	0	0	1.49	0	0	6.16	0	0	0	0	0	13.92	3.15	28.09	4.36	0	0	4.65	3.96	9.55	0	2.87	0	0	7.87	12.88	15.63	10.5	28.97	35.56	17.04	13.86	5.1	13.43
EARS2	1.53	4.03	8.64	0.73	23.98	0	6.45	0	0	0	0.75	0	0	10.26	0	0	2.1	0	0	1.55	3.15	0	0	0	0	0	0	3.18	0	0	0	0	0	15.34	19.54	0	1.45	17.24	5.96	5.54	2.04	10.51
ACACA	0	6.05	1.73	5.82	3.6	0	0	0	0	0	0	0	3.91	2.05	0	0	3.14	0	0	0	1.58	0	0	0	0	0	5.94	0	0	0	0	0	0.61	4.91	5.21	9	7.24	0	4.26	8.31	0	0
ACTR3C	14.57	21.17	16.41	16	6	23.57	36.56	13.21	38.63	0	2.24	0	11.72	0	0	5.67	7.33	0	0	13.92	4.73	3.74	4.36	0	14.56	2.33	5.94	0	0	2.87	0	0	14.52	48.46	15.63	7.5	26.07	44.18	17.04	8.31	112.13	34.44
TBC1D30	0	0	0	0	0	0	0	0	0	0	2.24	0	0	0	0	0	3.14	0	0	0	0	0	0	0	0	9.3	0	0	0	0	0	0	0.61	1.84	2.6	3	0	4.31	2.56	2.77	0	0
BDH1	3.07	0	4.32	2.18	0	4.49	2.15	10.38	0	0	1.49	0	0	0	0	0	5.24	0	0	3.09	0	3.74	0	0	0	0	1.98	0	0	4.31	0	0	4.84	3.07	14.33	7.5	1.45	1.08	17.04	2.77	5.1	4.67
TMEM63A	0	2.02	1.3	4.36	0	8.98	2.15	1.89	7.73	0	0.75	0	0	0	0	0	0	0	0	3.09	0	0	0	0	0	0	0	0	0	1.44	0	0	2.42	8.59	2.6	0	0	8.62	0.85	8.31	8.15	2.34
ST5	1.53	4.03	11.23	4.36	1.2	4.49	10.75	0.94	0	0	0.75	0	0	0	9.32	8.51	5.24	0	0	0	0	0	0	0	9.71	0	0	0	0	0	0	0	6.66	18.4	2.6	0	0	23.71	0	16.63	15.29	9.34
SLC15A3	0	2.02	3.02	3.64	2.4	3.37	0	4.72	0	0	1.49	0	0	2.05	0	0	2.1	0	0	0	0	0	8.71	0	0	1.16	0	0	10.31	0	0	0	1.21	14.11	5.21	0	4.34	10.78	0	8.31	0	7.01
ILDR2	2.3	4.03	5.62	3.64	6	0	0	0	0	0	0	0	0	0	0	0	0	0	0	0	1.58	0	0	0	0	0	0	0	0	0	0	0	2.42	7.97	0	0	1.45	1.08	3.41	5.54	5.1	2.92
SETD1A	0.77	0	3.02	3.64	1.2	1.12	0	0	0	0	0	0	0	0	0	2.84	2.1	3.63	0	0	4.73	0	4.36	0	0	2.33	1.98	0	0	0	0	0	0	1.84	2.6	6	0	0	7.67	8.31	6.12	1.17
EPB41L1	8.43	0	0.86	0.73	1.2	1.12	0	0.94	0	0	2.24	14.95	0	0	0	11.34	5.24	3.63	0	0	0	0	0	0	14.56	0	0	3.18	0	0	0	0	3.03	12.27	3.91	6	0	4.31	9.37	22.17	14.27	1.75
DUSP6	23	45.36	23.76	16.72	9.59	12.35	30.11	0	7.73	0	2.24	0	27.36	0	0	0	1.05	0	0	0	14.18	18.72	0	0	24.26	0	15.84	3.18	0	2.87	0	0	4.24	16.56	20.84	64.5	14.48	52.8	43.44	22.17	8.15	49.04
ZDHHC24	3.83	6.05	12.09	3.64	7.2	1.12	2.15	9.43	0	0	11.18	14.95	3.91	2.05	12.43	0	2.1	0	0	1.55	6.3	3.74	8.71	0	0	0	3.96	0	0	2.87	0	0	10.89	28.83	10.42	7.5	2.9	9.7	15.33	27.71	16.31	15.76
ELL3	3.83	2.02	5.62	2.91	7.2	1.12	4.3	3.77	0	0	18.63	7.48	7.82	0	15.53	5.67	7.33	0	0	3.09	4.73	9.36	0	0	0	0	3.96	3.18	10.31	5.74	0	0	7.26	12.88	0	28.5	7.24	11.85	11.07	47.11	11.21	15.18
IVD	5.37	0	2.59	5.82	0	1.12	0	4.72	0	0	0	0	0	0	3.11	0	4.19	0	0	10.83	0	1.87	0	0	0	0	1.98	0	0	0	0	0	4.84	3.07	2.6	7.5	10.14	5.39	5.11	0	10.19	3.5
LINC00152	6.13	53.42	42.76	17.45	28.78	29.18	19.36	3.77	0	0	10.44	82.23	7.82	0	3.11	19.85	22	10.9	0	10.83	4.73	11.23	0	0	48.53	22.09	19.81	3.18	0	41.62	0	7.71	77.44	27.6	160.19	187.5	26.07	76.51	9.37	36.02	90.72	2.92
PTPRJ	3.07	6.05	3.46	9.45	3.6	4.49	8.6	6.6	23.18	0	2.98	0	0	0	0	8.51	13.62	3.63	0	0	0	0	0	0	0	0	1.98	0	0	0	0	0	4.24	14.72	0	0	13.03	7.54	3.41	22.17	29.56	12.84
ATP1B1	3.07	0	12.09	1.45	4.8	0	4.3	0	0	0	0	0	0	0	0	2.84	0	0	0	1.55	0	3.74	0	0	0	0	0	0	0	0	0	0	0	0	6.51	9	0	1.08	5.96	5.54	5.1	0.58
MB21D2	2.3	20.16	10.37	2.18	11.99	6.73	15.06	0	0	0	5.96	0	0	10.26	0	2.84	8.38	0	0	3.09	3.15	1.87	0	0	9.71	2.33	0	0	0	4.31	0	0	5.45	7.36	22.14	6	1.45	24.79	12.78	27.71	13.25	9.92
SLC2A5	12.27	1.01	6.05	8	13.19	8.98	6.45	4.72	0	0	2.24	0	0	0	0	0	0	3.63	0	1.55	0	5.62	0	0	24.26	3.49	7.92	0	0	0	0	0	10.29	21.47	3.91	3	37.66	5.39	8.52	11.08	7.14	20.43
DISC1	0	0	0.86	0	2.4	2.24	4.3	0	0	0	0	0	0	0	0	0	0	0	0	6.19	0	0	0	0	0	0	0	0	0	0	0	0	0	2.45	3.91	0	0	2.16	0.85	2.77	0	3.5
KCNG1	0.77	3.02	3.02	3.64	2.4	2.24	0	0	0	0	3.73	0	0	0	3.11	0	3.14	0	0	0	0	1.87	0	0	0	3.49	0	0	0	0	0	0	0.61	1.23	5.21	3	4.34	2.16	0.85	0	7.14	6.42
MAL2	7.67	0	2.16	6.54	1.2	0	0	5.66	0	0	5.96	0	0	2.05	12.43	0	4.19	0	0	9.28	0	5.62	4.36	0	0	0	0	0	0	0	0	0	0	7.97	7.81	0	2.9	5.39	20.44	11.08	2.04	7.59
CRYAB	187.86	694.47	938.17	1049.93	393.34	2013.56	389.29	410.37	394.03	221.21	358.53	299.03	1059.09	0	21.75	734.51	66	98.08	163.75	468.73	217.44	136.69	13.07	0	106.76	97.68	263.41	31.82	30.92	275.58	50.34	501.44	891.79	837.33	45.58	2827.46	308.49	883.67	767.5	1219.29	3560.65	1527.77
CMTM8	1.53	0	0	0.73	1.2	0	0	1.89	0	0	0	0	7.82	0	9.32	0	0	0	0	1.55	0	3.74	8.71	0	0	0	9.9	0	0	0	0	0	2.42	9.2	11.72	6	1.45	5.39	5.11	0	4.08	3.5
SCIN	19.94	78.62	40.17	21.09	39.57	28.06	12.9	23.58	23.18	0	3.73	14.95	168.05	2.05	3.11	28.36	15.71	0	0	153.15	0	31.83	4.36	0	0	0	49.51	0	0	18.66	0	0	24.2	123.91	67.72	9	1.45	56.04	149.07	99.76	68.3	189.15
MINOS1P1	10.73	5.04	2.16	1.45	0	0	0	0	0	0	2.24	0	0	0	0	0	0	0	0	4.64	0	0	0	0	0	0	3.96	0	0	1.44	0	0	4.84	5.52	3.91	0	0	4.31	8.52	5.54	4.08	2.34
RETSAT	3.07	7.06	5.62	8.73	3.6	0	2.15	1.89	0	0	3.73	0	3.91	0	9.32	0	2.1	0	0	4.64	0	3.74	4.36	0	0	2.33	7.92	0	0	1.44	0	0	0.61	16.56	2.6	0	8.69	6.47	8.52	19.4	8.15	0.58
TMX4	10.73	7.06	8.21	16	11.99	5.61	2.15	14.15	0	0	0.75	0	0	0	0	0	10.48	3.63	0	13.92	12.6	0	4.36	0	0	0	0	3.18	0	2.87	0	0	1.82	27.6	19.54	0	0	8.62	14.48	5.54	28.54	14.01
NOP2	0.77	8.06	4.75	0.73	3.6	2.24	0	0	0	0	0.75	7.48	0	0	0	8.51	5.24	0	0	15.47	3.15	3.74	0	0	0	0	0	0	0	0	0	7.71	0	6.75	11.72	15	0	4.31	4.26	16.63	7.14	0
WBSCR27	19.94	34.27	7.34	31.27	28.78	1.12	0	7.55	0	0	0	0	0	0	0	0	0	0	0	35.58	0	5.62	0	0	0	0	0	0	0	0	0	0	8.47	10.43	36.47	0	17.38	18.32	9.37	11.08	39.76	21.02
APOL2	0	10.08	10.37	1.45	8.39	1.12	8.6	2.83	0	0	5.22	0	0	2.05	0	0	0	3.63	0	0	1.58	3.74	8.71	0	4.85	0	0	0	0	0	0	0	4.24	10.43	3.91	3	0	5.39	15.33	11.08	8.15	12.26
VTRNA1-3	4.6	3.02	15.12	17.45	29.98	8.98	15.06	9.43	38.63	0	11.93	0	0	0	3.11	2.84	28.28	3.63	0	18.56	4.73	0	21.78	0	0	9.3	0	9.55	0	2.87	0	11.57	16.94	56.44	10.42	39	5.79	4.31	51.11	11.08	29.56	51.96
CTSO	0.77	4.03	1.3	9.45	31.18	3.37	0	6.6	0	0	0	0	11.72	4.1	12.43	2.84	1.05	0	0	3.09	1.58	0	26.14	0	0	0	0	0	10.31	0	0	0	1.82	23.92	2.6	1.5	1.45	19.4	18.74	27.71	12.23	11.09
CFB	40.64	31.25	71.7	72.71	61.16	95.4	77.43	63.21	30.9	0	5.22	14.95	0	0	15.53	11.34	11.52	0	0	12.38	15.76	16.85	100.19	0	0	0	1.98	31.82	0	18.66	0	0	36.91	177.28	32.56	0	73.86	153.03	9.37	49.88	193.68	61.3
TRIM40	5.37	34.27	69.54	1.45	9.59	16.84	12.9	1.89	7.73	0	0	0	0	0	0	0	3.14	0	0	0	4.73	0	0	0	0	0	0	0	0	0	0	15.43	4.84	7.97	0	42	2.9	12.93	17.04	22.17	28.54	34.44
MORC4	0	22.17	17.28	6.54	23.98	11.22	36.56	0.94	0	0	0.75	0	15.63	16.42	27.96	73.74	2.1	10.9	0	0	0	1.87	30.49	0	0	3.49	3.96	0	0	0	0	0	3.63	37.42	14.33	3	11.59	3.23	67.29	72.05	34.66	32.11
RAB3IP	6.13	0	2.59	11.63	0	1.12	0	7.55	0	0	0	0	0	0	6.21	5.67	7.33	0	0	0	3.15	0	8.71	0	0	1.16	1.98	0	10.31	0	0	3.86	3.63	3.07	19.54	9	8.69	9.7	5.11	5.54	3.06	7.01
GNPNAT1	0	6.05	6.91	9.45	4.8	5.61	0	0	0	0	2.24	0	0	8.21	6.21	0	8.38	0	0	1.55	0	3.74	8.71	0	9.71	1.16	13.86	3.18	0	4.31	0	0	2.42	9.2	26.05	3	1.45	7.54	16.18	22.17	3.06	3.5
NCLN	5.37	11.09	4.32	10.18	22.78	2.24	2.15	3.77	0	0	8.2	7.48	0	8.21	15.53	5.67	3.14	0	0	1.55	0	0	4.36	0	0	1.16	0	0	10.31	0	0	0	1.82	33.12	0	1.5	13.03	15.09	5.96	2.77	18.35	21.6
RPARP-AS1	1.53	3.02	4.32	2.91	3.6	5.61	4.3	2.83	0	0	2.24	0	0	0	0	0	0	0	0	6.19	4.73	0	17.42	0	0	8.14	13.86	0	0	7.18	0	0	3.03	19.63	3.91	21	4.34	9.7	1.7	8.31	3.06	6.42
CHRNE	2.3	0	5.62	6.54	1.2	7.86	2.15	0	7.73	0	2.98	0	0	12.31	3.11	0	0	0	0	1.55	1.58	0	4.36	0	0	0	0	0	0	0	0	0	0.61	11.04	0	7.5	10.14	3.23	7.67	0	3.06	8.17
PRRG2	6.9	5.04	9.5	7.27	3.6	3.37	0	5.66	0	0	10.44	0	0	0	6.21	8.51	4.19	0	0	0	0	3.74	0	0	4.85	0	0	0	0	2.87	0	0	1.21	19.02	1.3	1.5	14.48	3.23	5.96	13.86	5.1	5.84
TEPP	0	1.01	0.43	1.45	0	0	0	8.49	0	0	1.49	7.48	0	0	6.21	0	0	0	0	1.55	0	0	0	0	0	0	0	0	0	1.44	0	0	0.61	4.29	2.6	0	1.45	3.23	1.7	0	5.1	7.01
ZNF527	0.77	1.01	1.73	5.09	0	2.24	0	0	0	0	0.75	7.48	0	0	0	0	0	0	0	1.55	6.3	0	0	0	9.71	2.33	0	0	0	0	0	3.86	1.21	4.29	9.12	6	0	5.39	0.85	5.54	1.02	4.67
LINC00667	4.6	9.07	2.59	2.18	3.6	1.12	8.6	0	0	0	2.24	0	0	2.05	0	0	7.33	0	0	6.19	0	0	0	0	0	1.16	1.98	0	0	0	0	0	1.82	6.75	9.12	7.5	1.45	2.16	9.37	5.54	3.06	0.58
KIAA1551	20.7	0	2.16	22.54	1.2	2.24	4.3	8.49	0	0	2.98	0	0	4.1	0	0	3.14	0	0	1.55	0	3.74	0	0	0	4.65	0	0	0	1.44	0	0	15.73	12.88	10.42	3	0	14.01	11.07	0	9.17	21.6
TMEM2	3.07	21.17	0	0	2.4	0	2.15	3.77	7.73	0	11.18	0	11.72	2.05	9.32	8.51	8.38	0	0	1.55	0	7.49	0	0	9.71	0	1.98	6.36	0	4.31	0	0	0.61	19.63	7.81	7.5	0	9.7	18.74	13.86	17.33	7.59
GDA	13.8	25.2	50.97	58.9	28.78	20.2	66.67	18.87	15.45	0	0.75	14.95	7.82	0	0	2.84	6.29	10.9	0	13.92	6.3	0	0	0	0	3.49	27.73	31.82	0	1.44	0	0	42.96	101.83	24.75	19.5	10.14	20.48	22.15	33.25	63.2	92.82
KIAA1462	0	22.17	5.18	5.82	10.79	1.12	2.15	0.94	7.73	0	1.49	0	11.72	2.05	0	45.38	2.1	0	0	0	7.88	5.62	0	0	0	0	3.96	12.73	0	0	0	0	2.42	10.43	6.51	4.5	10.14	19.4	9.37	22.17	18.35	23.94
OVOL1	6.13	86.68	29.8	8.73	16.79	11.22	32.26	2.83	0	0	2.24	7.48	3.91	4.1	9.32	5.67	18.86	58.12	0	0	1.58	0	0	0	0	1.16	0	19.09	0	1.44	0	0	29.04	22.7	1.3	0	13.03	44.18	46.85	49.88	46.89	68.89
NR4A2	1.53	7.06	15.55	1.45	0	0	15.06	0	0	0	0	0	0	0	6.21	0	0	0	0	0	0	0	0	0	14.56	1.16	1.98	0	0	0	0	0	4.84	6.13	5.21	10.5	0	9.7	10.22	8.31	4.08	2.34
TLR5	3.07	20.16	3.02	8.73	4.8	4.49	2.15	10.38	0	0	0	0	0	0	0	0	0	18.16	0	1.55	0	0	0	0	0	0	0	0	0	5.74	0	0	3.03	8.59	10.42	9	0	4.31	1.7	8.31	20.39	5.25
CABIN1	0	7.06	4.75	2.91	0	1.12	2.15	5.66	0	0	0	0	0	0	0	8.51	0	0	0	6.19	4.73	0	0	0	0	0	0	0	10.31	0	0	0	1.21	4.91	5.21	7.5	1.45	9.7	6.81	0	1.02	6.42
KCNE5	0	2.02	15.55	7.27	4.8	0	4.3	4.72	0	0	0	0	0	0	6.21	0	0	0	0	1.55	0	3.74	0	0	4.85	0	3.96	0	0	8.61	0	0	1.82	7.36	0	7.5	4.34	5.39	0	5.54	16.31	8.17
ASAH1	88.18	57.45	45.35	97.43	61.16	44.9	206.47	108.49	61.81	0	12.67	29.9	15.63	28.73	18.64	22.69	80.66	32.69	0	140.77	20.48	43.07	143.75	0	4.85	6.98	11.88	15.91	51.53	28.71	0	0	62.92	293.83	76.84	106.5	162.21	229.54	82.63	8.31	133.54	118.51
DHRS12	3.07	23.18	18.14	5.09	22.78	4.49	6.45	0	0	0	7.45	0	0	16.42	9.32	5.67	5.24	0	0	0	3.15	0	13.07	0	0	11.63	3.96	6.36	0	1.44	0	0	14.52	12.27	3.91	19.5	4.34	14.01	33.22	8.31	28.54	18.1
ZNF605	1.53	1.01	0	11.63	0	6.73	0	0	7.73	0	5.22	0	0	2.05	0	5.67	5.24	7.27	0	0	3.15	7.49	0	0	0	1.16	0	9.55	0	1.44	0	0	3.63	7.36	11.72	4.5	0	10.78	8.52	8.31	9.17	1.75
DPPA2	0.77	0	1.73	1.45	3.6	0	0	0.94	0	0	0.75	7.48	0	0	9.32	0	3.14	0	0	0	0	0	0	0	0	1.16	0	0	0	0	0	3.86	10.89	1.84	7.81	3	4.34	2.16	0	2.77	4.08	8.76
RABEP2	0	1.01	0.43	0.73	0	2.24	0	0	0	0	1.49	7.48	3.91	6.16	0	2.84	1.05	0	0	0	3.15	0	13.07	0	0	3.49	1.98	0	0	5.74	0	0	0.61	1.23	6.51	12	0	4.31	5.96	8.31	3.06	1.17
AIG1	22.24	6.05	12.53	23.27	27.58	23.57	2.15	24.53	7.73	55.3	43.98	0	15.63	0	3.11	0	16.76	7.27	0	41.77	4.73	24.34	30.49	0	14.56	2.33	9.9	9.55	20.61	14.35	0	0	41.14	99.37	28.65	22.5	8.69	21.55	96.26	16.63	50.97	41.45
WDYHV1	9.97	2.02	3.02	5.82	0	1.12	0	4.72	7.73	0	2.98	0	0	14.37	9.32	0	1.05	0	0	0	9.45	0	4.36	0	0	13.95	0	0	0	1.44	0	0	4.24	13.5	18.23	7.5	0	0	9.37	11.08	9.17	4.09
C7orf43	5.37	2.02	2.59	2.18	4.8	7.86	0	1.89	7.73	0	0	0	0	10.26	0	0	1.05	0	0	0	3.15	0	0	0	4.85	5.81	0	0	0	1.44	0	3.86	0	4.29	5.21	3	2.9	6.47	0.85	8.31	7.14	11.09
MAP1S	11.5	18.14	15.98	7.27	3.6	14.59	0	15.09	0	0	5.96	0	0	2.05	12.43	5.67	9.43	0	0	0	7.88	1.87	13.07	0	0	6.98	0	0	0	18.66	0	0	1.21	30.67	11.72	1.5	4.34	14.01	2.56	16.63	12.23	36.19
C1orf56	6.9	7.06	6.05	8	9.59	11.22	0	8.49	0	0	0	0	3.91	0	6.21	5.67	11.52	0	0	20.11	3.15	5.62	8.71	0	0	0	5.94	0	0	1.44	0	3.86	5.45	11.66	7.81	4.5	5.79	15.09	11.07	27.71	8.15	13.43
SLCO2A1	23	63.5	68.25	130.15	124.72	21.33	21.51	86.79	38.63	0	36.52	22.43	31.26	22.58	83.88	42.54	3.14	10.9	0	7.73	15.76	0	21.78	0	14.56	4.65	25.75	0	0	14.35	0	0	33.28	151.52	2.6	3	82.55	114.23	33.22	166.27	83.59	93.99
BCAS3	7.67	9.07	6.48	13.81	2.4	2.24	10.75	4.72	0	0	3.73	0	0	12.31	12.43	5.67	10.48	18.16	0	9.28	0	3.74	0	0	9.71	4.65	3.96	0	0	1.44	0	0	11.5	17.18	2.6	9	21.72	19.4	7.67	24.94	10.19	11.09
MBTPS2	3.07	18.14	12.53	13.09	16.79	12.35	0	7.55	0	0	10.44	7.48	7.82	4.1	0	0	2.1	10.9	0	9.28	14.18	11.23	8.71	0	9.71	4.65	1.98	6.36	0	5.74	0	0	4.84	45.39	1.3	13.5	18.83	9.7	7.67	16.63	20.39	18.68
TLK2	2.3	3.02	5.18	19.63	7.2	3.37	0	4.72	0	0	2.98	0	0	10.26	0	0	4.19	3.63	0	4.64	4.73	0	0	0	0	11.63	3.96	0	0	10.05	0	3.86	12.1	15.34	14.33	3	10.14	18.32	5.96	5.54	3.06	11.68
NCEH1	0.77	5.04	19.44	2.91	7.2	13.47	10.75	1.89	0	0	4.47	0	7.82	0	3.11	2.84	15.71	10.9	0	0	0	7.49	0	0	4.85	0	3.96	12.73	10.31	4.31	0	0	1.82	7.97	5.21	10.5	0	18.32	5.11	22.17	31.6	11.68
BCR	1.53	11.09	7.77	16	1.2	6.73	8.6	0.94	7.73	0	2.24	0	7.82	4.1	0	8.51	1.05	7.27	0	4.64	1.58	7.49	0	0	4.85	0	0	0	0	0	0	7.71	2.42	12.88	15.63	4.5	1.45	7.54	3.41	16.63	8.15	19.26
CD320	83.58	82.65	184.44	517.7	747.1	141.42	118.29	205.66	471.29	110.61	187.84	29.9	367.36	30.79	96.3	36.87	35.62	3.63	982.48	143.87	47.27	578.6	635.98	245.62	0	13.95	25.75	19.09	30.92	43.06	50.34	11.57	165.77	928.73	109.4	148.5	412.77	642.28	1245.38	55.42	485.22	686.53
SFXN4	3.07	30.24	19.01	2.91	31.18	8.98	15.06	16.04	15.45	0	2.98	7.48	15.63	6.16	0	5.67	6.29	7.27	0	13.92	9.45	9.36	8.71	0	0	4.65	15.84	0	0	10.05	0	23.14	7.87	37.42	20.84	49.5	0	9.7	20.44	55.42	12.23	11.09
LCP1	24.54	3.02	40.17	66.89	40.77	56.12	6.45	16.04	23.18	0	37.27	14.95	23.45	47.2	21.75	48.21	18.86	25.43	0	23.2	12.6	35.58	30.49	0	38.82	6.98	29.71	25.45	41.22	48.8	0	34.71	43.56	66.86	42.98	205.5	17.38	17.24	70.7	91.45	35.68	98.66
LGALS14	763.7	298.35	1229.72	2049.7	3644.37	2326.7	139.8	1704.7	1143.46	165.91	231.07	44.86	785.52	0	15.53	19.85	32.48	0	163.75	2487.51	4.73	56.17	21.78	0	0	615.12	25.75	0	51.53	110.52	0	100.29	2481.76	4359.61	6.51	1121.98	906.65	1072.26	1934.51	1288.57	1053.01	3327
TPRXL	19.17	17.13	23.32	18.9	15.59	10.1	88.18	33.02	46.36	0	8.2	14.95	11.72	0	0	17.02	20.95	3.63	0	15.47	7.88	0	0	0	0	22.09	0	6.36	0	4.31	0	0	42.35	34.97	46.89	73.5	4.34	8.62	32.37	13.86	75.43	28.61
TRIM44	21.47	8.06	18.57	18.18	10.79	6.73	4.3	5.66	46.36	0	8.94	14.95	3.91	8.21	15.53	31.2	7.33	10.9	0	20.11	4.73	26.21	21.78	0	9.71	8.14	1.98	60.46	0	5.74	0	11.57	32.07	66.25	31.26	6	76.76	25.86	36.63	11.08	15.29	46.7
STAT6	0	3.02	9.93	7.27	1.2	3.37	4.3	5.66	7.73	0	0	14.95	0	4.1	6.21	0	4.19	0	0	1.55	0	1.87	0	0	0	1.16	7.92	0	0	0	0	0	0	10.43	3.91	4.5	2.9	4.31	9.37	8.31	13.25	2.92
SPATA2	6.9	7.06	4.75	2.91	3.6	0	0	1.89	0	0	5.22	0	11.72	0	15.53	5.67	1.05	0	0	4.64	3.15	14.98	0	0	0	0	0	0	0	4.31	0	0	0	6.75	10.42	1.5	5.79	4.31	4.26	19.4	3.06	10.51
FBLN1	750.66	196.55	642.29	1227.35	856.23	887.81	615.12	871.69	1444.77	55.3	345.86	7.48	82.07	262.7	220.56	34.03	258.76	105.34	327.49	804.42	33.09	466.25	683.9	163.75	111.61	4.65	91.1	57.27	92.75	167.93	151.01	15.43	442.26	1987.5	406.34	28.5	1023.97	1423.58	858.65	629.04	1104.99	1353.8
POFUT2	6.9	14.11	16.41	4.36	9.59	2.24	0	13.21	7.73	0	23.11	7.48	0	0	0	14.18	6.29	3.63	0	12.38	1.58	14.98	13.07	0	9.71	13.95	1.98	19.09	0	15.79	0	3.86	13.31	15.95	2.6	24	24.62	34.48	11.07	8.31	25.48	29.19
CLCC1	2.3	8.06	6.05	9.45	9.59	2.24	2.15	2.83	0	0	0.75	22.43	0	4.1	0	0	13.62	0	0	0	1.58	0	0	0	0	0	0	12.73	0	1.44	0	0	6.66	5.52	15.63	1.5	10.14	11.85	2.56	8.31	16.31	2.92
SETD6	9.2	21.17	10.8	9.45	13.19	10.1	0	2.83	0	0	1.49	37.38	0	2.05	12.43	2.84	6.29	3.63	0	0	3.15	3.74	0	0	0	1.16	1.98	0	0	1.44	0	7.71	2.42	8.59	14.33	10.5	13.03	21.55	11.93	19.4	10.19	6.42
HMGN2	360.38	1527.03	529.55	1085.56	1325.12	600.48	326.92	677.35	803.51	276.52	336.91	164.47	195.4	110.83	229.88	275.09	395.99	272.44	900.61	1022.54	244.22	537.41	283.14	245.62	266.9	534.89	202.01	270.46	41.22	206.69	402.7	165.86	1393.95	1239.73	381.6	923.99	790.79	1414.95	1506.04	141.33	2953.11	2074.78
KATNBL1	486.9	292.3	239.72	276.3	298.6	186.32	402.19	500.94	162.25	331.82	247.47	201.85	324.37	47.2	49.7	887.66	143.52	98.08	0	80.44	189.07	117.97	100.19	327.49	97.05	115.12	61.4	66.82	41.22	265.53	0	115.72	450.73	671.09	1199.49	313.5	154.97	118.54	546.03	423.98	1073.39	570.36
RUNDC1	26.07	20.16	16.41	10.18	4.8	13.47	12.9	15.09	7.73	0	4.47	0	3.91	2.05	0	0	5.24	0	0	1.55	1.58	1.87	0	0	0	13.95	3.96	0	0	2.87	0	27	12.71	29.44	2.6	4.5	20.28	23.71	8.52	8.31	24.46	24.52
LINC00967	587.34	219.73	237.57	357.01	57.56	537.62	191.42	296.22	108.16	110.61	282.5	284.08	687.82	0	15.53	136.13	228.38	177.99	327.49	297.02	283.61	164.78	0	0	19.41	119.77	83.18	50.91	0	208.12	0	370.29	358.17	284.63	1138.28	214.5	311.39	550.68	543.47	482.17	579	646.84
RFC3	18.4	22.17	27.64	5.82	10.79	13.47	6.45	1.89	0	0	6.71	0	7.82	0	6.21	0	14.67	10.9	0	10.83	0	14.98	17.42	0	0	6.98	5.94	0	0	1.44	0	11.57	13.31	26.99	44.28	30	0	9.7	15.33	5.54	17.33	15.18
INHBA-AS1	9.97	35.28	25.05	28.36	2.4	11.22	19.36	43.4	0	0	13.42	7.48	0	0	0	11.34	7.33	18.16	0	0	3.15	7.49	4.36	0	0	3.49	13.86	0	0	4.31	0	3.86	7.26	44.17	45.58	12	21.72	9.7	6.81	16.63	22.43	15.76
RHBDD1	0	20.16	6.05	2.18	19.19	3.37	4.3	4.72	7.73	0	2.24	7.48	3.91	12.31	9.32	0	1.05	7.27	0	1.55	1.58	3.74	8.71	0	0	4.65	1.98	0	0	0	0	0	3.03	19.02	11.72	4.5	1.45	4.31	18.74	0	17.33	17.51
PREX1	2.3	1.01	5.62	26.18	0	7.86	25.81	0.94	7.73	0	1.49	0	0	4.1	3.11	0	2.1	3.63	0	0	0	0	0	0	4.85	0	1.98	0	10.31	0	0	0	9.68	3.68	15.63	1.5	7.24	3.23	9.37	22.17	7.14	12.26
CSH2	6451.58	2478.52	10838.6	13465.2	7631.72	4843.09	8274.01	12049.9	9526.24	2322.75	3513.75	829.82	9660.74	786.05	1621.62	9761.38	195.9	603	2046.83	14187.2	4605.54	3615.79	18648.2	7614.21	184.4	315.12	1911.2	830.46	350.4	3335.68	3422.93	2595.91	7413.83	18244.5	6214.97	2704.46	13121.9	24983.2	15223.1	6182.35	19238.5	13392.6
AHCY	8.43	23.18	23.76	17.45	21.59	21.33	4.3	8.49	54.08	0	35.03	7.48	11.72	22.58	21.75	8.51	2.1	3.63	0	4.64	18.91	7.49	8.71	81.87	0	0	41.59	0	0	1.44	50.34	7.71	6.05	34.97	20.84	36	17.38	20.48	41.74	69.28	86.65	26.27
MYO5B	4.6	5.04	1.3	8	7.2	5.61	4.3	3.77	0	0	19.38	14.95	3.91	2.05	6.21	14.18	5.24	47.22	0	0	6.3	1.87	0	0	4.85	17.44	7.92	9.55	0	0	0	11.57	4.84	30.06	5.21	22.5	10.14	11.85	15.33	36.02	11.21	4.09
WDSUB1	0.77	21.17	19.87	2.18	19.19	10.1	2.15	0.94	7.73	0	10.44	7.48	31.26	12.31	3.11	0	31.43	0	0	4.64	12.6	1.87	0	0	4.85	9.3	3.96	12.73	0	15.79	0	3.86	9.08	14.72	39.07	15	5.79	18.32	46	11.08	13.25	11.09
GSTK1	51.37	61.48	120.94	90.16	69.55	21.33	58.07	32.08	30.9	110.61	38.01	52.33	42.99	92.36	118.05	22.69	47.14	21.8	0	37.13	22.06	46.81	91.48	0	14.56	18.6	27.73	22.27	61.84	2.87	50.34	11.57	128.87	136.79	98.98	106.5	36.21	102.38	88.59	138.56	305.81	75.31
P2RX4	47.54	68.54	92.43	165.05	82.74	67.34	32.26	87.74	61.81	0	46.21	74.76	62.53	49.26	37.28	79.41	13.62	0	0	159.34	29.94	31.83	39.2	0	38.82	16.28	31.69	3.18	10.31	27.27	0	7.71	71.39	174.21	56	10.5	42	178.89	113.29	30.48	185.52	235.27
GCAT	0	22.17	5.62	4.36	11.99	6.73	4.3	1.89	0	0	3.73	14.95	0	0	0	8.51	17.81	7.27	0	0	0	5.62	4.36	0	4.85	0	0	0	0	1.44	50.34	0	3.03	9.2	10.42	30	1.45	21.55	18.74	16.63	9.17	2.34
FAHD2A	3.83	3.02	6.05	7.27	19.19	2.24	0	0.94	15.45	0	0	0	7.82	0	0	2.84	2.1	0	0	12.38	4.73	0	8.71	0	0	0	0	0	0	4.31	0	0	12.71	8.59	5.21	0	5.79	6.47	4.26	11.08	20.39	14.01
GOT1	26.84	21.17	22.89	39.99	61.16	8.98	0	47.17	23.18	0	13.42	7.48	7.82	6.16	18.64	11.34	11.52	0	0	30.94	0	13.11	4.36	0	4.85	10.47	1.98	3.18	10.31	2.87	0	3.86	7.26	39.87	36.47	16.5	1.45	35.56	21.3	5.54	45.87	78.23
CEP41	9.97	35.28	21.6	32.72	32.38	8.98	10.75	21.7	7.73	0	11.18	14.95	3.91	4.1	3.11	0	1.05	0	0	26.3	9.45	0	4.36	0	0	2.33	21.79	0	0	10.05	0	15.43	32.07	35.58	3.91	45	20.28	14.01	26.41	19.4	33.64	28.61
REEP4	3.83	41.33	58.31	34.17	15.59	20.2	40.86	30.19	54.08	0	24.6	14.95	31.26	14.37	18.64	68.06	3.14	39.96	0	47.96	22.06	18.72	8.71	0	9.71	4.65	7.92	31.82	0	2.87	0	3.86	26.62	47.23	28.65	28.5	14.48	50.65	36.63	121.93	99.9	33.86
USP32P2	1.53	1.01	1.3	0.73	4.8	1.12	0	0	7.73	0	5.96	0	0	4.1	0	0	0	14.53	0	0	0	0	4.36	0	0	4.65	0	0	0	2.87	0	0	4.24	8.59	5.21	4.5	0	5.39	2.56	8.31	2.04	2.34
TUBGCP5	1.53	15.12	9.5	2.91	7.2	0	2.15	4.72	0	0	0.75	0	7.82	0	3.11	0	7.33	7.27	0	0	11.03	0	4.36	0	0	3.49	0	3.18	0	0	0	0	0	8.59	14.33	4.5	0	11.85	7.67	2.77	5.1	5.25
TMED3	88.18	161.27	322.66	229.76	161.89	154.89	86.03	219.81	355.4	0	121.5	82.23	164.14	133.4	105.62	204.19	84.85	58.12	81.87	81.99	152.84	190.99	113.26	0	72.79	15.12	83.18	47.73	72.14	50.24	50.34	57.86	113.74	571.1	151.08	61.5	256.35	313.6	352.66	185.66	361.88	313.49
HEMK1	0.77	11.09	25.48	2.18	6	5.61	8.6	1.89	38.63	0	1.49	0	0	6.16	0	11.34	0	3.63	0	6.19	11.03	0	0	0	0	0	1.98	6.36	0	5.74	0	0	5.45	17.18	3.91	4.5	8.69	29.1	4.26	11.08	17.33	8.17
YIPF2	29.9	170.34	334.75	199.95	152.3	151.52	38.71	100	69.53	55.3	34.29	0	27.36	55.41	74.56	167.32	58.67	21.8	0	105.19	170.17	50.56	69.7	81.87	29.12	24.42	11.88	28.64	41.22	20.09	50.34	19.29	69.58	280.95	31.26	37.5	172.35	210.14	187.4	96.99	383.28	233.51
UCK2	44.47	47.37	120.94	84.34	34.78	67.34	36.56	51.89	15.45	0	11.93	67.28	23.45	2.05	18.64	68.06	57.62	21.8	81.87	32.49	75.63	59.92	135.04	81.87	14.56	45.35	23.77	22.27	10.31	30.14	0	23.14	65.95	120.84	66.42	181.5	34.76	28.02	213.81	96.99	74.41	138.36
PLK3	16.1	81.64	33.69	18.18	34.78	11.22	30.11	22.64	0	0	16.4	0	0	0	3.11	5.67	14.67	3.63	0	12.38	11.03	9.36	0	0	24.26	10.47	11.88	9.55	0	7.18	0	3.86	50.22	41.1	41.68	9	4.34	21.55	20.44	30.48	64.22	52.54
PTCD2	1.53	1.01	4.32	0	2.4	2.24	0	0	0	0	1.49	0	3.91	0	9.32	0	2.1	0	0	4.64	0	3.74	0	0	0	2.33	3.96	0	0	0	0	0	4.24	5.52	6.51	4.5	1.45	1.08	3.41	5.54	0	2.34
MLST8	3.07	10.08	6.91	0.73	3.6	0	10.75	0.94	0	0	0.75	0	0	0	6.21	0	0	0	0	0	1.58	1.87	13.07	0	0	1.16	0	0	0	0	0	0	0.61	6.75	2.6	6	1.45	1.08	3.41	5.54	7.14	4.67
DGAT1	0	9.07	3.46	0	1.2	0	0	0	0	0	0	7.48	0	4.1	9.32	0	0	3.63	0	1.55	3.15	1.87	0	0	9.71	0	0	0	0	0	0	0	1.21	7.36	3.91	0	7.24	1.08	2.56	5.54	2.04	5.25
TCAF1	11.5	6.05	7.77	15.27	6	1.12	4.3	9.43	7.73	0	11.18	0	7.82	10.26	9.32	5.67	16.76	25.43	0	4.64	1.58	29.96	21.78	0	9.71	2.33	15.84	12.73	0	1.44	0	11.57	3.63	39.87	14.33	13.5	8.69	25.86	19.59	22.17	9.17	16.35
DGCR2	19.94	4.03	9.07	5.82	2.4	8.98	0	4.72	7.73	0	2.98	0	19.54	0	0	0	7.33	3.63	0	1.55	9.45	0	0	0	0	11.63	0	0	10.31	2.87	0	0	2.42	9.2	7.81	0	17.38	12.93	11.07	5.54	10.19	9.92
TCTA	15.34	91.72	99.35	20.36	50.37	28.06	23.66	19.81	38.63	0	3.73	29.9	0	6.16	9.32	11.34	19.9	18.16	0	26.3	20.48	18.72	34.85	0	9.71	2.33	27.73	0	0	4.31	0	7.71	16.94	28.22	15.63	57	42	36.64	51.96	52.65	90.72	33.86
DHX30	7.67	11.09	25.48	3.64	25.18	2.24	17.21	9.43	7.73	0	5.96	29.9	0	8.21	12.43	25.52	11.52	10.9	0	15.47	17.33	3.74	4.36	0	0	6.98	25.75	9.55	10.31	8.61	0	3.86	1.82	49.07	16.93	10.5	13.03	31.25	10.22	38.8	9.17	21.6
TRIM62	2.3	4.03	18.14	3.64	22.78	3.37	6.45	0	0	0	10.44	0	11.72	4.1	6.21	8.51	8.38	3.63	0	3.09	0	0	17.42	0	29.12	1.16	5.94	3.18	0	17.22	0	0	4.84	17.79	6.51	7.5	5.79	9.7	11.07	33.25	21.41	8.76
FURIN	43.71	31.03	13.04	94.52	17.29	16.24	124.74	57.55	77.26	0	34.29	74.76	3.91	24.63	12.43	19.85	34.57	10.98	0	75.8	26.79	18.72	8.71	163.75	92.2	19.77	5.94	19.09	0	24.4	0	42.43	49.01	120.84	77.81	45	68.07	92.68	42.59	72.05	106.01	144.78
ATXN7L3B	16.87	19.15	42.76	12.36	33.58	23.57	12.9	5.66	0	0	24.6	14.95	0	59.52	0	14.18	16.76	7.27	0	0	11.03	1.87	4.36	0	0	26.74	7.92	9.55	0	7.18	0	7.71	9.08	28.22	15.63	7.5	8.69	38.8	40.89	22.17	61.16	19.26
PCBD1	4.6	3.02	24.62	17.45	22.78	2.24	17.21	1.89	0	0	4.47	29.9	7.82	34.89	9.32	0	7.33	0	0	0	1.58	22.47	74.05	0	14.56	9.3	35.65	0	10.31	4.31	0	3.86	10.89	36.19	22.14	7.5	4.34	11.85	35.78	38.8	54.03	22.18
ACAA2	19.94	101.8	60.04	29.08	34.78	30.3	124.74	22.64	69.53	0	36.52	44.86	3.91	8.21	12.43	73.74	35.62	0	0	18.56	67.75	16.85	26.14	0	29.12	29.07	23.77	15.91	30.92	41.62	0	30.86	16.34	96.92	70.33	36	49.24	42.03	52.81	44.34	159.02	102.16
LNPEP	70.54	65.52	101.51	175.23	143.9	200.91	124.74	72.64	15.45	0	42.49	89.71	156.32	8.21	3.11	56.72	113.14	21.8	0	34.03	64.6	33.7	4.36	0	19.41	8.14	7.92	3.18	0	18.66	0	65.57	142.18	160.1	5.21	117	120.21	155.18	86.04	58.19	289.5	159.37
COPS7B	3.07	2.02	7.77	1.45	8.39	10.1	2.15	3.77	7.73	0	5.96	0	0	0	6.21	2.84	5.24	7.27	0	0	15.76	3.74	0	0	0	6.98	1.98	0	0	2.87	0	0	3.03	9.2	5.21	7.5	7.24	12.93	2.56	2.77	12.23	7.01
PTPMT1	69.78	141.11	124.83	111.25	122.32	79.69	96.78	109.43	100.44	0	33.54	52.33	78.16	32.84	12.43	28.36	68.09	50.86	0	108.29	119.75	76.77	91.48	0	29.12	44.19	71.3	38.18	51.53	43.06	0	30.86	82.89	180.35	170.61	144	99.93	104.53	133.74	169.04	140.67	148.87
VKORC1L1	4.6	9.07	9.07	3.64	14.39	4.49	10.75	10.38	7.73	0	4.47	0	0	8.21	0	5.67	6.29	3.63	0	1.55	1.58	3.74	4.36	0	0	3.49	9.9	0	20.61	1.44	0	3.86	10.89	14.72	10.42	12	2.9	18.32	8.52	5.54	18.35	9.34
OSMR	25.3	23.18	59.61	59.62	23.98	47.14	51.62	33.02	23.18	55.3	122.24	37.38	93.79	6.16	108.73	147.47	82.76	47.22	0	71.16	53.57	41.19	4.36	0	63.09	3.49	59.42	63.64	0	48.8	0	11.57	68.97	204.27	19.54	141	53.59	65.74	152.48	177.35	70.34	52.54
SOS1	6.13	3.02	3.02	1.45	0	7.86	12.9	1.89	7.73	0	6.71	0	0	4.1	6.21	5.67	15.71	10.9	0	1.55	3.15	20.6	0	0	0	10.47	3.96	0	0	8.61	0	0	6.05	19.63	14.33	7.5	2.9	8.62	6.81	16.63	3.06	10.51
SUN2	0.77	0	5.18	8.73	2.4	7.86	15.06	3.77	7.73	0	1.49	0	0	8.21	0	0	5.24	7.27	0	4.64	3.15	5.62	0	0	4.85	1.16	0	0	10.31	1.44	0	0	1.21	13.5	2.6	10.5	11.59	11.85	2.56	8.31	1.02	2.34
CSTA	0.77	16.13	6.48	7.27	4.8	8.98	0	0	7.73	0	21.62	0	3.91	0	21.75	2.84	0	0	0	0	3.15	26.21	0	0	0	0	1.98	0	0	24.4	0	0	13.92	22.08	15.63	9	0	7.54	19.59	13.86	7.14	8.76
USP40	5.37	11.09	13.39	0.73	13.19	8.98	0	5.66	0	0	10.44	0	0	8.21	27.96	2.84	10.48	7.27	0	0	3.15	5.62	13.07	0	14.56	4.65	1.98	0	0	5.74	0	0	7.26	11.04	19.54	4.5	1.45	8.62	11.07	16.63	10.19	26.27
ACSL3	26.07	25.2	46.65	35.63	97.14	4.49	70.98	28.3	15.45	0	12.67	59.81	11.72	2.05	24.85	85.08	16.76	14.53	0	37.13	72.48	20.6	43.56	0	14.56	16.28	7.92	12.73	0	5.74	0	11.57	37.51	58.28	134.15	42	37.66	11.85	80.07	33.25	30.58	84.07
RPSAP9	2.3	9.07	4.32	2.18	2.4	3.37	0	2.83	0	0	0	14.95	0	2.05	3.11	2.84	7.33	0	0	0	1.58	0	4.36	0	4.85	2.33	3.96	0	0	0	0	0	2.42	7.97	2.6	4.5	10.14	5.39	4.26	2.77	2.04	5.84
TMEM206	9.97	10.08	6.91	16.72	44.37	6.73	8.6	16.98	0	0	15.65	7.48	31.26	2.05	0	2.84	20.95	14.53	0	10.83	17.33	13.11	0	0	9.71	0	7.92	19.09	0	5.74	0	11.57	7.26	15.34	5.21	24	8.69	19.4	35.78	22.17	38.74	19.26
TLR3	32.2	7.06	43.63	45.81	31.18	41.53	30.11	69.81	15.45	0	41.74	142.04	3.91	0	15.53	0	45.05	3.63	0	20.11	29.94	59.92	17.42	0	24.26	24.42	33.67	25.45	0	38.75	0	19.29	96.8	65.64	95.07	55.5	20.28	47.42	88.59	38.8	101.94	52.54
FAM172A	31.44	10.08	19.44	40.72	13.19	7.86	17.21	20.75	7.73	0	29.82	14.95	3.91	2.05	0	2.84	19.9	29.06	0	12.38	1.58	13.11	8.71	0	0	52.33	13.86	12.73	0	14.35	0	15.43	26.62	58.28	48.19	21	24.62	16.16	23.85	8.31	27.52	32.69
TMEM205	69.78	24.19	82.07	97.43	50.37	130.2	19.36	83.96	54.08	0	36.52	29.9	35.17	139.56	130.47	14.18	28.28	0	81.87	29.39	53.57	54.3	87.12	0	87.35	16.28	55.45	28.64	20.61	38.75	0	11.57	58.08	204.88	125.03	63	111.52	91.6	127.78	69.28	72.38	105.08
ITPRIPL2	0	8.06	19.87	4.36	27.58	7.86	23.66	25.47	61.81	0	2.24	0	0	0	0	14.18	12.57	0	0	27.85	3.15	7.49	4.36	0	4.85	0	0	0	0	1.44	50.34	0	4.24	30.67	6.51	1.5	15.93	39.87	13.63	27.71	12.23	35.03
ST3GAL1	33.74	106.84	206.03	207.22	317.79	327.74	81.73	121.7	108.16	0	153.55	112.14	97.7	32.84	24.85	263.74	141.42	148.93	81.87	75.8	115.02	28.09	17.42	0	38.82	5.81	45.55	66.82	10.31	103.34	0	169.72	40.54	496.87	0	184.5	111.52	204.75	122.66	290.97	279.31	240.52
FUCA1	85.11	20.16	53.99	146.15	125.92	106.63	8.6	94.34	15.45	55.3	138.64	0	285.29	51.31	77.66	87.91	23.05	58.12	0	83.54	105.57	159.16	95.83	0	77.64	10.47	29.71	19.09	10.31	67.46	0	11.57	52.64	326.96	52.1	46.5	62.28	148.72	212.96	124.7	127.42	164.04
IPO5	0	16.13	8.21	13.81	10.79	3.37	10.75	0	7.73	0	0	0	0	18.47	6.21	0	9.43	0	0	1.55	0	11.23	0	0	0	2.33	1.98	6.36	0	0	0	0	4.24	14.11	7.81	6	14.48	6.47	3.41	8.31	6.12	11.09
PIK3AP1	72.08	5.04	10.8	40.72	0	15.71	4.3	46.23	7.73	0	57.39	7.48	15.63	0	0	28.36	37.71	61.75	0	43.31	14.18	52.43	0	0	9.71	55.81	13.86	15.91	0	24.4	0	19.29	13.31	66.25	108.1	7.5	21.72	37.72	36.63	33.25	25.48	57.21
CCDC91	16.1	36.29	34.55	37.08	37.18	22.45	19.36	53.77	0	0	5.96	0	0	12.31	18.64	14.18	13.62	7.27	81.87	9.28	4.73	14.98	26.14	0	0	13.95	17.82	3.18	0	18.66	0	7.71	15.73	54.59	62.51	7.5	15.93	28.02	22.15	33.25	46.89	45.54
TOE1	7.67	6.05	4.75	6.54	2.4	3.37	0	4.72	0	0	3.73	0	0	0	0	2.84	3.14	10.9	0	1.55	1.58	14.98	13.07	0	0	13.95	0	0	0	4.31	0	3.86	1.21	15.34	14.33	4.5	0	6.47	6.81	5.54	6.12	5.25
LOC100128988	10.73	65.52	22.89	30.54	34.78	30.3	47.32	56.6	23.18	0	7.45	22.43	31.26	2.05	0	14.18	71.24	21.8	0	40.22	7.88	33.7	0	0	0	37.21	41.59	31.82	0	38.75	0	30.86	7.26	30.06	32.56	78	30.41	4.31	46	63.74	85.63	70.64
GAR1	6.9	19.15	31.53	5.82	15.59	5.61	8.6	3.77	0	0	8.94	0	3.91	4.1	18.64	14.18	26.19	10.9	0	3.09	17.33	5.62	4.36	0	0	6.98	15.84	19.09	0	7.18	0	27	6.66	12.27	23.44	27	7.24	22.63	23.85	19.4	14.27	21.6
DERL3	1028.23	992.82	1622.79	1475.29	629.58	538.74	2481.99	1978.29	1390.69	553.04	524.01	560.69	230.58	30.79	68.34	127.62	38.76	94.45	245.62	915.8	475.84	702.19	21.78	81.87	155.29	124.42	83.18	165.46	103.06	232.52	251.69	34.71	1158	1517	169.31	148.5	2049.39	1570.14	1894.48	371.33	2123.34	1202.6
SLC7A2	21.47	68.54	28.94	95.25	73.15	42.65	30.11	38.68	46.36	0	41.74	0	50.8	12.31	21.75	59.56	128.85	76.28	0	24.75	50.42	41.19	8.71	327.49	33.97	17.44	19.81	15.91	0	14.35	0	30.86	34.49	184.03	3.91	151.5	73.86	99.14	92	85.9	56.07	94.57
ZNF226	29.9	3.02	11.66	15.27	17.99	15.71	2.15	13.21	0	0	24.6	82.23	23.45	2.05	15.53	42.54	5.24	7.27	0	20.11	4.73	14.98	4.36	0	14.56	34.88	3.96	19.09	10.31	34.45	0	15.43	38.12	47.23	41.68	39	7.24	33.41	68.15	19.4	19.37	28.02
TMEM147	82.04	260.05	131.31	219.58	279.41	29.18	62.37	189.62	54.08	0	27.58	74.76	42.99	108.78	124.26	119.11	114.19	25.43	0	71.16	182.77	52.43	165.53	0	29.12	19.77	138.64	3.18	113.37	28.71	0	38.57	133.71	363.15	109.4	82.5	172.35	191.82	189.11	88.68	248.73	237.02
HCG18	6.13	27.21	31.1	7.27	19.19	13.47	6.45	7.55	7.73	0	1.49	22.43	3.91	10.26	0	5.67	14.67	18.16	0	7.73	3.15	7.49	21.78	0	4.85	0	0	0	0	5.74	0	3.86	3.03	20.24	6.51	16.5	33.31	26.94	11.07	8.31	11.21	15.76
CASP2	5.37	8.06	14.25	18.18	6	3.37	10.75	11.32	15.45	0	2.98	14.95	11.72	2.05	6.21	2.84	18.86	3.63	0	3.09	3.15	3.74	17.42	0	4.85	0	1.98	9.55	0	7.18	0	0	1.21	23.92	6.51	9	8.69	18.32	5.96	22.17	15.29	9.92
MGST2	16.87	17.13	31.1	50.17	37.18	43.77	8.6	16.98	7.73	0	14.91	67.28	19.54	45.15	37.28	36.87	1.05	21.8	0	1.55	42.54	11.23	104.55	0	19.41	2.33	49.51	0	0	10.05	0	30.86	72.6	47.85	18.23	84	33.31	46.34	60.48	38.8	106.01	35.61
TRAPPC6A	53.67	176.39	177.96	85.8	212.26	76.32	79.58	66.98	115.89	110.61	55.16	134.57	11.72	63.62	74.56	34.03	34.57	18.16	0	57.24	69.33	22.47	39.2	0	4.85	61.63	108.93	19.09	41.22	30.14	0	42.43	99.22	239.85	50.79	103.5	141.94	125.01	72.41	44.34	253.82	217.75
ST8SIA6-AS1	47.54	12.1	17.71	54.53	22.78	4.49	27.96	25.47	54.08	0	20.13	0	7.82	0	9.32	28.36	44	29.06	0	41.77	39.39	26.21	43.56	0	9.71	33.72	49.51	0	10.31	22.97	0	30.86	36.3	68.09	79.45	43.5	20.28	15.09	39.18	74.82	54.03	34.44
TIMM8A	19.17	50.4	41.47	13.81	40.77	10.1	27.96	22.64	0	0	8.2	0	23.45	0	9.32	34.03	19.9	0	0	21.66	20.48	11.23	0	0	0	8.14	15.84	31.82	30.92	17.22	0	19.29	12.1	25.76	48.19	70.5	14.48	26.94	10.22	13.86	49.95	31.52
CTAGE5	144.92	45.36	63.06	170.87	62.36	33.67	25.81	106.6	15.45	0	44.72	37.38	15.63	18.47	62.13	36.87	24.09	3.63	0	99.01	12.6	24.34	13.07	0	0	33.72	9.9	3.18	10.31	34.45	0	3.86	32.07	94.47	101.59	39	2.9	136.86	110.74	27.71	40.77	120.84
SURF1	8.43	17.13	32.4	20.36	38.37	24.69	40.86	11.32	23.18	0	9.69	22.43	15.63	12.31	0	22.69	24.09	7.27	0	15.47	20.48	22.47	21.78	0	0	15.12	7.92	0	0	5.74	0	11.57	15.73	31.9	33.86	13.5	21.72	26.94	40.04	33.25	32.62	30.94
NBN	31.44	10.08	31.53	24.72	29.98	28.06	0	28.3	0	0	5.96	0	7.82	36.94	37.28	17.02	25.14	54.49	0	23.2	6.3	22.47	47.92	0	0	18.6	1.98	9.55	0	24.4	0	27	30.25	38.03	50.79	46.5	8.69	39.87	44.3	63.74	15.29	20.43
WDR86-AS1	72.84	15.12	11.23	122.88	50.37	81.93	0	200.94	38.63	110.61	79.76	59.81	39.08	0	3.11	42.54	35.62	87.18	0	112.93	39.39	13.11	0	0	0	20.93	31.69	0	0	14.35	0	19.29	88.33	88.95	13.02	88.5	15.93	81.9	157.59	49.88	121.3	166.38
PHTF2	10.73	12.1	7.77	16.72	10.79	2.24	25.81	2.83	0	0	23.11	0	7.82	12.31	15.53	8.51	16.76	7.27	0	3.09	3.15	3.74	8.71	0	4.85	2.33	13.86	3.18	10.31	10.05	0	11.57	14.52	9.81	20.84	22.5	5.79	23.71	16.18	16.63	24.46	11.68
HSD17B8	11.5	30.24	19.01	10.18	20.39	2.24	4.3	3.77	15.45	0	4.47	29.9	0	2.05	6.21	0	7.33	0	0	9.28	12.6	13.11	0	0	38.82	2.33	17.82	0	10.31	2.87	0	23.14	8.47	15.34	35.16	7.5	20.28	20.48	29.81	0	17.33	25.69
SWT1	11.5	17.13	6.05	16	41.97	28.06	17.21	10.38	0	0	9.69	0	19.54	12.31	21.75	22.69	1.05	7.27	0	9.28	1.58	5.62	0	0	0	20.93	7.92	0	0	2.87	0	11.57	33.28	31.9	16.93	1.5	15.93	8.62	14.48	38.8	32.62	26.85
ARL4A	233.1	436.44	606.87	149.78	314.19	38.16	109.69	195.28	77.26	0	46.96	216.8	19.54	8.21	6.21	8.51	126.76	90.81	0	102.1	143.38	69.28	4.36	81.87	53.38	17.44	176.27	130.46	0	97.6	0	73.29	127.05	77.9	390.71	265.5	62.28	341.62	294.73	16.63	256.88	393.47
GOLGA1	5.37	30.24	17.28	15.27	17.99	17.96	15.06	10.38	7.73	0	12.67	14.95	11.72	22.58	3.11	0	9.43	0	0	6.19	7.88	11.23	4.36	0	4.85	16.28	5.94	9.55	0	14.35	0	0	12.1	19.02	13.02	33	2.9	11.85	37.48	13.86	14.27	24.52
TKT	5.37	34.27	10.8	5.09	13.19	10.1	10.75	2.83	7.73	0	8.94	82.23	7.82	10.26	77.66	11.34	32.48	14.53	0	1.55	7.88	16.85	0	0	4.85	1.16	15.84	0	30.92	4.31	0	3.86	4.84	10.43	57.3	19.5	20.28	46.34	20.44	16.63	30.58	22.18
OXNAD1	0	3.02	3.02	12.36	3.6	6.73	10.75	1.89	0	0	0	0	0	2.05	21.75	0	0	0	0	0	0	0	17.42	0	0	2.33	5.94	3.18	0	0	0	11.57	0	8.59	3.91	6	1.45	9.7	6.81	2.77	10.19	9.34
SIPA1L1	10.73	41.33	45.35	8	53.96	30.3	55.92	4.72	0	0	33.54	44.86	58.62	2.05	3.11	2.84	27.24	39.96	0	9.28	37.81	11.23	0	0	0	16.28	0	35	0	33.01	0	30.86	19.36	59.5	14.33	43.5	14.48	37.72	29.81	72.05	55.05	37.36
DDX19A	9.2	9.07	12.09	10.18	14.39	19.08	12.9	7.55	0	0	11.93	0	7.82	0	9.32	8.51	7.33	18.16	0	10.83	20.48	9.36	0	0	9.71	22.09	1.98	0	0	2.87	0	11.57	6.66	7.36	19.54	25.5	20.28	12.93	23	16.63	8.15	7.01
PIP5K1A	13.04	3.02	5.62	9.45	3.6	4.49	17.21	6.6	23.18	0	13.42	14.95	15.63	4.1	3.11	2.84	13.62	10.9	0	9.28	9.45	5.62	0	0	0	6.98	0	12.73	0	7.18	0	3.86	10.29	21.47	14.33	13.5	17.38	1.08	11.07	16.63	17.33	14.59
LDLR	21.47	60.48	37.58	25.45	49.17	22.45	8.6	5.66	15.45	0	32.05	7.48	11.72	12.31	3.11	59.56	61.81	39.96	0	15.47	1.58	20.6	4.36	0	33.97	0	31.69	19.09	0	35.88	0	30.86	4.24	64.41	15.63	39	2.9	67.89	22.15	85.9	34.66	39.11
CIZ1	2.3	6.05	2.59	4.36	8.39	8.98	2.15	2.83	7.73	0	8.2	7.48	0	14.37	6.21	11.34	9.43	0	0	0	1.58	20.6	4.36	0	0	6.98	3.96	0	0	1.44	0	3.86	6.05	15.95	5.21	10.5	8.69	20.48	4.26	5.54	7.14	5.84
LRRC47	33.74	22.17	22.03	18.18	19.19	14.59	2.15	19.81	7.73	0	15.65	7.48	19.54	4.1	6.21	8.51	5.24	14.53	0	7.73	6.3	13.11	0	0	0	1.16	13.86	3.18	0	8.61	0	7.71	7.26	30.67	16.93	4.5	28.97	20.48	4.26	11.08	20.39	33.86
CLMN	18.4	38.3	47.94	17.45	37.18	39.28	70.98	33.02	146.8	0	6.71	0	15.63	0	0	2.84	6.29	0	0	57.24	3.15	0	0	0	4.85	1.16	3.96	15.91	0	1.44	0	0	34.49	49.69	48.19	6	26.07	60.35	11.07	27.71	64.22	39.7
PGLS	13.04	43.34	39.31	35.63	14.39	6.73	6.45	33.96	46.36	0	13.42	29.9	15.63	49.26	12.43	0	10.48	7.27	0	30.94	3.15	9.36	17.42	0	24.26	10.47	19.81	6.36	20.61	14.35	0	0	19.36	34.35	49.49	30	31.86	30.17	20.44	24.94	31.6	52.54
PPAT	13.8	44.35	45.35	17.45	46.77	8.98	6.45	42.45	7.73	0	17.89	14.95	0	18.47	31.07	17.02	19.9	14.53	0	20.11	39.39	28.09	8.71	0	19.41	37.21	5.94	28.64	10.31	11.48	0	11.57	19.97	15.95	41.68	66	34.76	47.42	17.89	16.63	32.62	61.88
APIP	4.6	5.04	6.48	10.91	8.39	1.12	2.15	9.43	7.73	0	5.96	0	3.91	0	0	0	14.67	7.27	0	3.09	4.73	0	17.42	0	4.85	0	0	3.18	10.31	0	0	0	6.05	7.36	7.81	6	1.45	4.31	13.63	13.86	15.29	5.84
WDFY1	17.64	17.13	10.37	18.18	13.19	14.59	8.6	20.75	0	0	2.98	0	7.82	12.31	12.43	0	15.71	3.63	0	40.22	15.76	1.87	0	0	0	12.79	5.94	0	0	0	0	11.57	18.76	31.9	23.44	12	4.34	19.4	9.37	8.31	17.33	29.19
CUTA	200.89	180.42	294.58	219.58	131.91	214.38	105.39	228.3	254.96	165.91	131.93	97.19	82.07	330.43	236.1	31.2	160.28	65.39	0	148.51	83.51	97.37	209.09	163.75	63.09	55.81	182.21	47.73	103.06	58.85	151.01	42.43	218.41	538.59	330.8	79.5	273.73	322.22	387.58	163.5	255.86	262.12
ELL2	20.7	52.41	74.73	23.27	16.79	44.9	113.99	30.19	30.9	0	43.23	52.33	54.71	12.31	15.53	82.24	23.05	32.69	0	24.75	29.94	18.72	8.71	0	82.5	25.58	21.79	25.45	0	54.54	0	61.72	129.47	78.52	6.51	84	144.83	93.76	32.37	44.34	102.96	74.14
STAG3L4	15.34	30.24	21.16	9.45	16.79	11.22	34.41	13.21	0	0	1.49	22.43	39.08	6.16	3.11	25.52	17.81	3.63	81.87	6.19	1.58	20.6	13.07	0	24.26	8.14	11.88	12.73	0	5.74	0	7.71	7.26	16.56	31.26	66	4.34	10.78	28.11	36.02	38.74	26.85
PLA2G12A	133.42	33.26	86.39	85.8	40.77	40.41	36.56	78.3	30.9	0	52.18	59.81	35.17	26.68	62.13	11.34	35.62	7.27	0	103.65	34.66	52.43	39.2	0	29.12	41.86	69.32	44.55	133.98	51.67	100.67	11.57	49.01	118.39	87.26	141	47.79	123.93	97.96	49.88	78.49	140.69
RAB11FIP5	23.77	27.21	30.67	46.53	35.98	29.18	21.51	42.45	15.45	0	34.29	0	0	0	6.21	28.36	36.67	50.86	0	30.94	3.15	13.11	0	0	29.12	4.65	0	3.18	0	22.97	0	11.57	16.94	80.36	7.81	18	21.72	57.12	30.67	30.48	23.45	39.11
POLR3E	3.07	20.16	23.32	9.45	14.39	11.22	6.45	11.32	0	0	3.73	0	0	4.1	0	5.67	9.43	0	0	10.83	1.58	1.87	0	0	0	8.14	3.96	0	0	4.31	0	19.29	3.63	13.5	9.12	12	1.45	11.85	17.04	2.77	17.33	11.09
MRPS25	15.34	58.46	49.67	10.18	11.99	31.43	32.26	13.21	0	55.3	24.6	14.95	27.36	12.31	15.53	22.69	29.33	10.9	0	13.92	29.94	22.47	26.14	81.87	14.56	33.72	37.63	31.82	10.31	11.48	0	42.43	38.72	70.54	50.79	69	17.38	30.17	39.18	74.82	77.47	24.52
CXorf38	6.13	14.11	19.01	12.36	7.2	7.86	4.3	16.98	0	0	5.22	0	0	10.26	9.32	0	13.62	0	0	20.11	1.58	3.74	0	0	0	18.6	0	12.73	20.61	11.48	50.34	0	13.31	23.31	18.23	1.5	15.93	6.47	11.07	19.4	31.6	23.94
TBL2	17.64	36.29	59.61	19.63	38.37	20.2	23.66	37.74	0	0	13.42	14.95	0	4.1	27.96	25.52	11.52	21.8	0	15.47	7.88	9.36	8.71	0	0	5.81	19.81	6.36	0	2.87	0	0	11.5	22.08	22.14	9	18.83	51.73	20.44	36.02	31.6	37.95
EML4	72.84	123.98	101.94	135.24	170.29	66.22	152.7	29.25	69.53	55.3	58.89	29.9	54.71	63.62	90.09	82.24	56.57	3.63	81.87	86.63	64.6	13.11	60.98	0	58.23	17.44	61.4	35	61.84	57.41	50.34	38.57	152.46	179.73	46.89	109.5	114.42	185.36	140.55	196.75	167.18	84.07
CRELD1	11.5	3.02	52.26	45.08	61.16	20.2	8.6	30.19	15.45	165.91	8.2	7.48	62.53	16.42	24.85	17.02	18.86	7.27	0	18.56	3.15	7.49	34.85	0	0	1.16	0	9.55	10.31	8.61	0	0	76.23	46.62	28.65	7.5	46.35	88.37	40.04	66.51	38.74	41.45
C14orf1	16.1	40.32	30.67	62.53	43.17	11.22	43.02	24.53	15.45	0	9.69	0	11.72	57.47	68.34	25.52	7.33	14.53	0	21.66	11.03	29.96	100.19	0	0	4.65	49.51	19.09	41.22	5.74	0	0	27.23	74.22	49.49	37.5	20.28	19.4	58.78	52.65	75.43	40.28
SQLE	288.3	176.39	288.1	278.48	284.21	70.71	318.31	168.87	123.62	0	52.18	112.14	7.82	94.41	251.63	79.41	155.04	98.08	0	180.99	126.05	46.81	100.19	0	24.26	47.68	43.57	41.36	123.67	41.62	50.34	30.86	82.89	206.72	135.45	274.5	115.87	375.02	138	157.95	370.03	272.63
TMEM106B	44.47	25.2	44.06	65.44	71.95	21.33	73.13	37.74	30.9	0	37.27	52.33	46.9	18.47	21.75	56.72	60.76	7.27	0	44.86	53.57	16.85	21.78	81.87	29.12	48.84	23.77	35	30.92	21.53	0	34.71	56.87	71.16	115.91	70.5	13.03	30.17	109.03	116.39	63.2	65.97
ARHGAP1	6.9	11.09	36.28	9.45	20.39	11.22	6.45	2.83	7.73	0	8.2	0	11.72	4.1	12.43	8.51	2.1	14.53	0	4.64	9.45	3.74	13.07	0	19.41	0	17.82	0	10.31	4.31	0	0	5.45	23.31	6.51	22.5	1.45	17.24	3.41	30.48	16.31	19.85
SLC44A1	12.27	32.25	31.1	22.54	76.75	40.41	70.98	25.47	15.45	0	5.96	29.9	11.72	4.1	0	17.02	59.71	29.06	0	24.75	15.76	31.83	8.71	0	24.26	2.33	35.65	9.55	0	8.61	0	38.57	12.1	62.57	16.93	37.5	28.97	49.57	51.96	27.71	38.74	59.55
FBXW4	7.67	6.05	3.46	2.91	0	0	0	4.72	7.73	0	4.47	14.95	0	4.1	3.11	2.84	0	3.63	0	4.64	1.58	0	8.71	0	14.56	6.98	1.98	0	0	2.87	0	3.86	6.66	12.88	5.21	6	8.69	8.62	2.56	0	6.12	12.84
BSPRY	19.17	1.01	4.75	7.27	9.59	15.71	2.15	2.83	0	0	3.73	7.48	39.08	0	0	8.51	15.71	14.53	0	0	6.3	11.23	4.36	0	0	23.26	11.88	0	0	2.87	0	0	13.92	10.43	22.14	19.5	11.59	14.01	8.52	8.31	21.41	4.09
RANBP6	4.6	6.05	21.16	9.45	14.39	10.1	0	16.04	0	0	2.98	14.95	0	4.1	0	5.67	9.43	3.63	0	1.55	6.3	0	0	0	0	10.47	3.96	9.55	0	0	0	0	5.45	10.43	10.42	3	14.48	6.47	5.11	5.54	17.33	12.26
TMEM186	16.1	12.1	44.49	11.63	15.59	13.47	4.3	16.98	0	0	6.71	7.48	7.82	10.26	21.75	8.51	24.09	0	0	12.38	3.15	14.98	0	0	19.41	1.16	7.92	3.18	0	5.74	0	0	12.71	21.47	36.47	13.5	14.48	23.71	17.04	0	10.19	23.35
GOSR2	58.27	168.33	236.27	88.71	233.84	104.38	79.58	100.94	54.08	0	28.32	14.95	35.17	20.52	27.96	17.02	20.95	47.22	0	44.86	40.97	44.94	4.36	0	33.97	30.23	17.82	22.27	51.53	30.14	0	73.29	62.92	75.45	61.21	58.5	73.86	114.23	87.74	85.9	148.83	245.77
TLDC1	39.87	27.21	76.02	49.44	26.38	55	38.71	45.28	23.18	0	18.63	14.95	11.72	16.42	9.32	2.84	12.57	7.27	0	58.78	1.58	24.34	17.42	0	19.41	15.12	21.79	6.36	0	11.48	0	23.14	39.33	42.33	37.77	0	46.35	38.8	17.89	49.88	95.82	49.04
CS	5.37	13.1	14.25	4.36	19.19	4.49	2.15	8.49	15.45	0	4.47	7.48	15.63	6.16	0	2.84	12.57	3.63	0	7.73	7.88	5.62	0	0	0	0	9.9	0	0	0	0	11.57	3.03	11.04	10.42	13.5	8.69	9.7	11.07	5.54	3.06	25.1
IMPACT	8.43	22.17	12.96	16.72	14.39	8.98	8.6	0.94	0	0	16.4	22.43	0	28.73	12.43	42.54	11.52	7.27	0	3.09	4.73	11.23	30.49	0	24.26	4.65	17.82	12.73	51.53	8.61	0	0	13.92	28.83	33.86	12	13.03	12.93	50.26	36.02	16.31	17.51
N4BP2	40.64	78.62	65.22	44.35	91.14	28.06	62.37	35.85	30.9	0	15.65	0	3.91	8.21	15.53	25.52	23.05	0	0	27.85	12.6	24.34	4.36	0	4.85	4.65	15.84	15.91	0	5.74	0	23.14	32.67	76.68	32.56	9	37.66	26.94	39.18	22.17	74.41	72.97
CYHR1	1.53	7.06	5.62	4.36	0	7.86	4.3	3.77	7.73	0	12.67	0	0	8.21	9.32	0	13.62	3.63	0	7.73	11.03	1.87	8.71	0	4.85	3.49	11.88	0	10.31	1.44	0	7.71	3.63	7.97	6.51	9	14.48	4.31	19.59	8.31	10.19	5.25
STAT5A	0.77	18.14	12.96	6.54	9.59	6.73	6.45	0.94	38.63	0	12.67	14.95	3.91	0	0	28.36	12.57	7.27	0	9.28	9.45	3.74	4.36	0	0	1.16	3.96	3.18	0	0	0	23.14	3.03	20.86	10.42	9	10.14	9.7	7.67	24.94	15.29	18.68
ZBTB21	34.5	33.26	19.87	32.72	26.38	30.3	19.36	33.02	23.18	0	11.93	7.48	15.63	22.58	0	5.67	27.24	7.27	0	24.75	20.48	20.6	0	0	9.71	27.91	21.79	6.36	0	4.31	0	11.57	23.6	42.94	44.28	28.5	15.93	22.63	22.15	24.94	34.66	36.78
PCBD2	24.54	34.27	37.15	39.99	11.99	3.37	12.9	17.92	0	0	9.69	52.33	3.91	12.31	0	14.18	3.14	7.27	0	34.03	22.06	13.11	0	0	4.85	23.26	13.86	0	0	7.18	0	11.57	21.78	33.74	19.54	7.5	40.55	19.4	24.7	8.31	32.62	41.45
PPA1	22.24	70.56	82.07	45.81	53.96	14.59	17.21	34.91	0	0	16.4	0	15.63	41.05	37.28	14.18	49.24	7.27	0	13.92	53.57	65.54	34.85	0	24.26	2.33	33.67	9.55	123.67	8.61	0	42.43	55.06	47.23	31.26	84	23.17	64.66	75.81	94.22	42.81	53.12
NDUFA7	101.21	139.1	146.43	161.42	221.85	171.72	92.48	167.92	69.53	0	69.32	14.95	66.44	57.47	55.92	36.87	44	7.27	0	137.68	42.54	37.45	56.63	0	77.64	97.68	81.2	73.18	82.45	76.07	100.67	73.29	127.05	190.78	95.07	103.5	126	127.16	162.7	119.16	237.51	237.02
DPEP2	29.9	2.02	43.19	31.99	27.58	34.79	17.21	19.81	23.18	0	4.47	22.43	23.45	0	0	25.52	11.52	14.53	0	24.75	15.76	11.23	56.63	0	0	0	1.98	3.18	0	2.87	0	0	16.94	50.3	6.51	15	26.07	47.42	18.74	19.4	25.48	32.69
FUT10	15.34	6.05	13.82	4.36	4.8	1.12	4.3	6.6	7.73	0	0.75	0	0	10.26	3.11	11.34	7.33	7.27	0	7.73	4.73	5.62	0	0	9.71	3.49	3.96	6.36	0	11.48	0	11.57	6.66	12.27	14.33	12	7.24	10.78	13.63	2.77	8.15	9.92
ADAM12	1660.05	726.72	979.63	2416.16	1244.77	2089.88	1628.13	1871.68	1985.6	718.95	1612.27	515.83	1711.73	925.61	593.35	2974.92	932.36	1554.71	163.75	1554.7	814.6	1351.94	226.51	1555.59	1353.92	205.82	447.6	706.37	504.99	1159.74	553.71	574.73	856.7	4165.77	272.2	503.99	3297.84	2835.3	2472.87	1643.27	2369.01	2244.08
DDX52	17.64	42.33	25.92	29.08	28.78	5.61	32.26	25.47	7.73	0	3.73	0	0	2.05	15.53	5.67	16.76	10.9	0	17.02	4.73	3.74	4.36	0	0	9.3	9.9	0	10.31	21.53	0	3.86	37.51	25.15	28.65	16.5	24.62	11.85	17.89	13.86	17.33	47.29
FNDC3A	174.82	385.03	329.14	394.09	540.84	414.16	763.52	182.07	177.7	55.3	401.76	29.9	293.1	252.44	232.99	306.28	292.28	148.93	0	335.69	231.62	65.54	191.67	327.49	208.67	223.26	126.75	194.09	92.75	229.65	0	100.29	391.44	683.97	45.58	431.99	411.33	303.9	761.54	568.08	527.01	457.11
KRTCAP2	606.51	803.33	788.72	1043.39	685.94	759.85	468.87	1057.54	216.33	110.61	354.06	156.99	496.32	482.3	509.47	864.97	503.89	177.99	245.62	505.86	485.29	651.63	418.18	0	334.84	181.4	209.93	66.82	340.1	331.56	302.02	470.58	880.29	1390.02	645.98	404.99	899.41	859.96	988.13	454.46	1128.44	1248.14
FAM98A	32.97	115.91	104.53	53.08	131.91	55	96.78	17.92	23.18	0	27.58	0	35.17	43.1	49.7	85.08	79.62	36.33	81.87	43.31	69.33	1.87	56.63	0	43.67	33.72	43.57	35	30.92	18.66	0	42.43	39.93	71.77	48.19	96	27.52	127.16	133.74	91.45	103.98	89.32
GPS1	15.34	89.71	55.29	14.54	58.76	19.08	47.32	54.72	23.18	0	5.96	22.43	19.54	24.63	34.17	5.67	23.05	18.16	0	27.85	29.94	11.23	39.2	0	14.56	24.42	19.81	9.55	0	5.74	0	7.71	24.81	42.33	40.37	49.5	56.48	33.41	12.78	49.88	69.32	30.94
PRLR	60.57	106.84	90.27	88.71	113.92	44.9	88.18	45.28	54.08	0	74.54	0	42.99	0	12.43	130.45	165.52	90.81	0	122.21	81.93	37.45	0	0	48.53	40.7	39.61	44.55	0	40.19	0	30.86	63.53	97.53	50.79	75	102.83	153.03	91.15	63.74	194.7	76.48
EPB41	21.47	23.18	46.65	23.99	34.78	24.69	2.15	20.75	0	0	3.73	0	35.17	28.73	0	36.87	9.43	0	0	0	3.15	13.11	4.36	0	4.85	9.3	3.96	15.91	0	5.74	0	0	7.87	17.18	22.14	10.5	14.48	23.71	51.11	16.63	20.39	18.68
TMEM123	22.24	28.22	44.92	32.72	20.39	32.55	45.17	23.58	0	0	22.36	104.66	7.82	0	15.53	17.02	46.09	18.16	0	29.39	37.81	33.7	4.36	0	29.12	4.65	57.43	3.18	0	5.74	0	19.29	21.18	82.2	33.86	40.5	4.34	37.72	40.04	58.19	41.79	33.86
TSPAN3	8.43	0	17.28	24.72	6	24.69	2.15	28.3	7.73	55.3	7.45	0	27.36	20.52	55.92	28.36	16.76	0	0	35.58	11.03	9.36	17.42	0	4.85	4.65	9.9	3.18	30.92	15.79	0	0	21.18	57.05	5.21	13.5	37.66	33.41	42.59	13.86	30.58	19.26
DCUN1D1	13.8	24.19	18.57	35.63	22.78	23.57	32.26	11.32	7.73	0	18.63	0	7.82	30.79	15.53	11.34	25.14	0	0	30.94	25.21	26.21	39.2	0	9.71	22.09	11.88	6.36	20.61	30.14	0	19.29	30.25	44.78	26.05	48	11.59	6.47	53.67	33.25	35.68	32.11
LOC101928000	27.6	13.1	12.53	18.18	7.2	8.98	8.6	10.38	0	0	7.45	29.9	19.54	0	15.53	2.84	6.29	3.63	0	17.02	4.73	5.62	0	0	0	2.33	15.84	0	0	7.18	0	3.86	13.31	11.66	29.95	10.5	14.48	14.01	13.63	16.63	13.25	9.34
TAF10	1.53	8.06	5.18	11.63	0	11.22	0	2.83	7.73	0	6.71	0	0	12.31	12.43	0	11.52	14.53	0	0	12.6	1.87	8.71	0	33.97	1.16	1.98	9.55	0	1.44	0	0	9.08	21.47	11.72	12	11.59	4.31	8.52	5.54	9.17	10.51
HDDC3	47.54	64.51	53.99	26.18	33.58	34.79	6.45	36.79	15.45	0	21.62	29.9	15.63	2.05	9.32	2.84	17.81	10.9	0	44.86	22.06	48.68	8.71	0	43.67	27.91	53.47	22.27	0	10.05	0	69.43	27.23	41.71	98.98	63	13.03	21.55	48.55	16.63	53.01	54.88
C6orf120	6.13	12.1	7.77	8	1.2	6.73	4.3	2.83	0	0	6.71	0	7.82	10.26	0	0	3.14	10.9	0	7.73	15.76	13.11	0	0	9.71	3.49	9.9	0	0	4.31	0	11.57	7.87	5.52	9.12	6	4.34	6.47	12.78	22.17	13.25	7.59
MTA3	20.7	29.23	42.33	40.72	28.78	21.33	27.96	17.92	15.45	0	19.38	29.9	7.82	2.05	59.02	8.51	22	18.16	0	52.6	7.88	13.11	39.2	0	0	39.54	15.84	12.73	41.22	17.22	0	27	69.58	49.69	22.14	37.5	66.62	19.4	37.48	41.57	63.2	42.62
CKAP5	31.44	50.4	23.76	34.9	43.17	12.35	27.96	25.47	7.73	0	5.96	7.48	3.91	10.26	21.75	17.02	22	14.53	0	13.92	0	3.74	8.71	0	0	8.14	13.86	6.36	30.92	17.22	0	15.43	33.88	47.23	28.65	28.5	13.03	32.33	30.67	24.94	36.7	18.1
PIGP	37.57	18.14	34.55	44.35	40.77	63.98	15.06	34.91	23.18	55.3	58.14	22.43	11.72	12.31	52.81	28.36	33.52	21.8	0	58.78	39.39	43.07	47.92	0	29.12	56.98	31.69	22.27	0	143.53	0	15.43	66.55	76.68	46.89	91.5	43.45	40.95	110.74	83.13	41.79	54.88
METTL12	5.37	0	13.82	6.54	2.4	1.12	4.3	14.15	0	0	6.71	7.48	0	2.05	12.43	0	6.29	3.63	0	0	6.3	5.62	4.36	0	4.85	1.16	7.92	3.18	0	1.44	0	7.71	7.87	7.36	1.3	12	0	8.62	12.78	8.31	7.14	11.68
FKBPL	13.04	2.02	15.12	5.82	0	17.96	0	4.72	0	0	5.96	0	15.63	0	0	0	10.48	3.63	0	21.66	3.15	13.11	0	0	19.41	2.33	0	9.55	0	8.61	0	7.71	4.24	6.13	22.14	12	5.79	10.78	7.67	5.54	8.15	14.59
EIF2B2	38.34	154.21	163.27	72.71	105.53	223.35	101.09	66.04	100.44	0	17.14	89.71	23.45	18.47	34.17	22.69	42.95	61.75	163.75	44.86	55.15	26.21	8.71	0	43.67	113.95	41.59	41.36	10.31	30.14	0	111.86	104.06	90.17	46.89	217.5	76.76	84.06	132.03	138.56	140.67	145.95
MRPL24	9.2	120.95	68.25	40.72	147.5	10.1	49.47	23.58	30.9	55.3	4.47	0	0	22.58	6.21	2.84	2.1	3.63	0	6.19	23.63	29.96	4.36	0	0	3.49	35.65	6.36	92.75	10.05	0	7.71	30.25	67.48	10.42	61.5	50.69	38.8	36.63	19.4	73.39	67.72
GFPT1	378.02	444.5	276.87	499.52	273.42	243.56	195.72	505.66	77.26	276.52	219.89	52.33	136.78	153.93	186.39	411.21	152.95	90.81	81.87	366.63	154.41	232.19	56.63	81.87	29.12	76.75	41.59	136.82	51.53	122	50.34	115.72	73.21	466.2	351.64	81	147.73	597.02	429.32	205.06	367.99	487.46
CST3	143.39	64.51	154.2	165.05	82.74	264.88	43.02	127.36	123.62	0	41	112.14	97.7	106.72	267.16	45.38	47.14	14.53	0	145.41	33.09	144.18	291.86	0	43.67	26.74	41.59	50.91	92.75	45.93	0	0	218.41	363.76	187.54	63	78.21	188.59	152.48	210.6	121.3	154.12
ZBTB38	55.21	89.71	93.73	100.34	82.74	197.54	73.13	27.36	30.9	0	87.96	7.48	121.15	36.94	18.64	82.24	102.66	47.22	0	94.36	48.84	29.96	21.78	0	33.97	18.6	17.82	35	0	11.48	0	19.29	156.09	177.28	23.44	78	91.24	59.27	183.14	41.57	119.27	98.08
ALG9	35.27	39.31	41.47	57.44	43.17	42.65	55.92	50	15.45	0	24.6	7.48	54.71	22.58	74.56	17.02	8.38	14.53	0	15.47	47.27	7.49	60.98	0	14.56	18.6	33.67	12.73	113.37	14.35	0	3.86	49.61	95.69	6.51	25.5	49.24	61.43	27.26	88.68	75.43	68.3
ERLEC1	203.19	175.38	353.32	296.66	340.57	230.09	103.24	224.53	169.97	55.3	122.24	59.81	144.6	158.03	161.54	218.37	99.52	36.33	81.87	116.02	121.32	95.5	165.53	81.87	82.5	74.42	69.32	111.36	61.84	103.34	100.67	23.14	287.99	394.43	49.49	181.5	153.52	349.16	401.21	238.32	202.85	388.8
PARP2	13.04	11.09	17.71	20.36	17.99	11.22	0	15.09	7.73	0	10.44	14.95	23.45	6.16	6.21	0	25.14	3.63	0	13.92	6.3	11.23	21.78	0	0	32.56	13.86	9.55	10.31	27.27	0	15.43	19.36	15.95	42.98	33	10.14	11.85	24.7	22.17	21.41	9.92
ARFIP1	10.73	37.29	31.96	35.63	35.98	50.51	25.81	26.41	38.63	0	38.76	7.48	27.36	38.99	9.32	34.03	16.76	10.9	0	10.83	29.94	11.23	21.78	0	14.56	10.47	15.84	15.91	10.31	18.66	0	11.57	39.33	52.14	23.44	48	11.59	31.25	32.37	36.02	50.97	56.04
FAM63B	116.55	250.98	255.27	203.59	235.04	249.17	178.51	153.77	231.78	110.61	238.52	52.33	82.07	110.83	96.3	235.38	75.43	108.98	327.49	303.2	116.6	54.3	78.41	245.62	111.61	23.26	33.67	28.64	123.67	63.15	100.67	34.71	219.62	475.4	50.79	45	382.36	312.52	206.14	185.66	426.1	325.17
MTCH2	68.24	77.61	48.81	106.16	64.76	65.1	49.47	60.38	38.63	0	46.96	52.33	50.8	36.94	31.07	36.87	78.57	47.22	0	35.58	48.84	44.94	34.85	0	53.38	93.02	73.28	54.09	61.84	60.28	50.34	15.43	68.97	93.85	122.42	112.5	46.35	29.1	92	108.07	97.86	119.68
ZNF114	39.87	1.01	52.7	13.81	9.59	21.33	17.21	8.49	7.73	0	8.94	22.43	15.63	0	15.53	2.84	20.95	47.22	0	7.73	0	5.62	13.07	0	0	15.12	17.82	25.45	0	5.74	0	19.29	47.19	26.38	26.05	39	18.83	34.48	33.22	8.31	23.45	19.85
GSTZ1	5.37	15.12	25.48	12.36	10.79	14.59	0	2.83	0	0	2.24	0	0	0	43.49	2.84	12.57	14.53	0	13.92	7.88	1.87	17.42	0	0	17.44	0	3.18	0	1.44	0	3.86	20.57	9.81	5.21	10.5	18.83	11.85	11.07	8.31	28.54	19.85
TBC1D15	16.87	51.4	43.19	53.08	32.38	21.33	94.63	34.91	15.45	0	14.16	0	23.45	26.68	24.85	22.69	22	7.27	0	64.97	25.21	13.11	13.07	0	0	39.54	17.82	9.55	10.31	10.05	50.34	7.71	49.01	39.87	87.26	22.5	27.52	43.11	48.55	44.34	48.93	42.03
PELO	30.67	68.54	55.29	53.81	21.59	43.77	21.51	38.68	0	0	48.45	37.38	11.72	100.57	118.05	2.84	34.57	47.22	0	32.49	17.33	16.85	87.12	0	4.85	36.05	31.69	25.45	20.61	34.45	50.34	23.14	38.12	73	139.35	91.5	14.48	45.26	69	49.88	44.85	43.2
NUDT2	32.97	19.15	22.89	33.45	15.59	24.69	2.15	33.02	7.73	0	27.58	7.48	15.63	18.47	27.96	0	27.24	10.9	0	29.39	7.88	16.85	30.49	0	0	15.12	9.9	15.91	0	4.31	0	7.71	49.61	40.49	53.4	4.5	11.59	35.56	32.37	19.4	28.54	28.02
TSEN15	12.27	29.23	37.58	28.36	20.39	29.18	12.9	39.62	0	0	19.38	29.9	35.17	32.84	27.96	5.67	32.48	25.43	0	29.39	29.94	20.6	8.71	0	9.71	9.3	1.98	15.91	51.53	15.79	0	11.57	7.87	38.65	58.61	22.5	18.83	29.1	66.44	8.31	24.46	43.2
PRRC1	115.78	80.64	113.6	92.34	115.12	143.67	40.86	130.19	54.08	55.3	43.98	14.95	50.8	90.3	40.39	48.21	77.52	47.22	0	54.14	77.21	46.81	17.42	0	9.71	65.12	23.77	57.27	10.31	31.58	151.01	46.29	63.53	66.86	226.61	114	31.86	95.91	111.59	124.7	108.05	106.83
NDRG3	3.83	8.06	17.71	5.82	2.4	1.12	8.6	6.6	0	0	4.47	0	7.82	0	12.43	14.18	2.1	3.63	0	1.55	11.03	11.23	0	0	29.12	2.33	0	3.18	10.31	1.44	0	0	3.63	13.5	1.3	1.5	11.59	10.78	8.52	11.08	11.21	15.18
ERAL1	15.34	42.33	36.28	31.27	34.78	15.71	27.96	18.87	7.73	0	20.87	22.43	15.63	34.89	49.7	19.85	27.24	14.53	0	27.85	29.94	43.07	34.85	0	9.71	13.95	21.79	19.09	10.31	11.48	0	15.43	12.71	43.55	72.93	58.5	10.14	23.71	25.56	36.02	35.68	28.61
UBE3C	0.77	4.03	5.18	8.73	2.4	23.57	8.6	0.94	0	0	5.96	0	7.82	0	6.21	19.85	7.33	7.27	0	9.28	6.3	3.74	4.36	0	14.56	20.93	5.94	0	20.61	1.44	0	11.57	3.63	19.02	9.12	6	15.93	8.62	6.81	16.63	9.17	11.68
NHP2	115.78	339.67	505.37	92.34	605.6	131.32	255.94	132.07	115.89	0	57.39	171.94	85.98	176.5	130.47	48.21	140.38	54.49	0	57.24	154.41	78.64	204.73	0	53.38	19.77	188.15	9.55	164.9	81.81	0	138.86	124.03	295.67	197.96	322.5	182.49	275.88	152.48	83.13	378.19	269.71
SFSWAP	34.5	28.22	19.87	29.81	3.6	21.33	27.96	33.96	15.45	0	37.27	0	11.72	8.21	9.32	5.67	23.05	39.96	0	26.3	26.79	9.36	0	0	48.53	20.93	15.84	9.55	0	18.66	0	0	60.5	59.5	35.16	15	36.21	31.25	17.04	19.4	43.83	26.27
STAG1	23	13.1	17.71	23.27	19.19	21.33	4.3	13.21	15.45	0	17.14	22.43	3.91	10.26	21.75	0	20.95	10.9	0	12.38	14.18	14.98	0	0	4.85	24.42	1.98	9.55	0	1.44	0	3.86	17.55	14.11	35.16	22.5	4.34	29.1	23	24.94	9.17	12.84
PPP2R1B	9.2	9.07	14.25	8.73	10.79	12.35	2.15	10.38	0	0	0.75	0	0	22.58	3.11	2.84	4.19	3.63	0	9.28	0	3.74	39.2	0	4.85	4.65	3.96	9.55	30.92	1.44	0	7.71	12.1	15.34	16.93	13.5	8.69	16.16	15.33	13.86	6.12	10.51
MAP7	27.6	26.21	26.78	20.36	19.19	33.67	25.81	20.75	0	0	11.18	0	3.91	12.31	52.81	14.18	23.05	0	0	26.3	14.18	5.62	17.42	0	14.56	6.98	5.94	3.18	10.31	0	0	19.29	33.28	30.67	14.33	21	24.62	43.11	27.26	5.54	16.31	45.54
PIH1D1	37.57	103.82	222.88	71.26	111.53	77.44	90.33	49.06	7.73	0	32.05	82.23	19.54	24.63	31.07	34.03	11.52	21.8	0	52.6	39.39	28.09	60.98	0	63.09	19.77	13.86	6.36	20.61	68.9	0	42.43	85.91	69.93	82.05	70.5	97.04	53.88	45.15	52.65	138.63	126.1
ARL6IP5	93.55	313.47	187.46	267.57	368.15	176.21	363.48	173.58	23.18	0	60.38	22.43	78.16	262.7	242.31	235.38	169.71	87.18	0	255.25	83.51	121.71	435.6	0	164.99	65.12	93.08	66.82	247.34	66.02	100.67	65.57	105.27	312.23	42.98	81	256.35	385.8	271.73	171.81	440.37	435.5
PAFAH2	11.5	29.23	50.97	32.72	51.57	46.02	23.66	30.19	15.45	0	31.31	0	7.82	30.79	15.53	2.84	7.33	10.9	0	10.83	26.79	7.49	4.36	0	14.56	6.98	13.86	15.91	10.31	8.61	0	0	10.89	62.57	14.33	12	21.72	21.55	36.63	27.71	31.6	25.1
EVI5	131.88	149.17	118.78	114.15	119.92	90.91	109.69	30.19	54.08	0	44.72	22.43	50.8	75.94	68.34	56.72	58.67	69.02	0	114.48	34.66	22.47	39.2	0	48.53	31.4	29.71	6.36	20.61	61.72	0	19.29	145.81	180.96	35.16	36	55.04	167.04	109.89	85.9	132.52	126.1
RRP8	7.67	33.26	33.69	13.09	22.78	1.12	21.51	11.32	0	0	4.47	22.43	0	16.42	0	0	16.76	3.63	0	3.09	4.73	0	4.36	0	0	12.79	3.96	0	0	1.44	0	7.71	10.89	13.5	16.93	12	7.24	16.16	11.93	5.54	24.46	15.18
CYTH2	18.4	97.77	114.46	66.89	185.88	35.92	64.52	86.79	23.18	0	46.96	37.38	7.82	86.2	37.28	110.6	18.86	29.06	0	55.69	36.24	46.81	69.7	0	67.94	25.58	5.94	38.18	20.61	24.4	0	42.43	30.25	49.69	122.42	46.5	78.21	76.51	63.89	66.51	161.06	67.14
NORAD	12.27	32.25	75.16	18.18	43.17	28.06	4.3	27.36	30.9	0	1.49	14.95	15.63	10.26	12.43	8.51	31.43	25.43	0	4.64	28.36	7.49	0	81.87	14.56	6.98	0	3.18	0	1.44	0	0	12.71	35.58	19.54	19.5	14.48	32.33	28.11	24.94	50.97	37.95
SNAPC5	26.84	35.28	38.87	16.72	56.36	17.96	23.66	33.96	30.9	0	20.13	7.48	54.71	16.42	12.43	22.69	18.86	14.53	0	23.2	50.42	13.11	17.42	0	4.85	36.05	29.71	6.36	20.61	80.38	0	30.86	24.81	30.67	41.68	76.5	15.93	34.48	63.89	22.17	36.7	50.79
MCRS1	11.5	19.15	21.6	17.45	27.58	14.59	8.6	14.15	7.73	0	6.71	7.48	7.82	26.68	27.96	25.52	18.86	14.53	0	15.47	15.76	16.85	17.42	0	14.56	5.81	3.96	25.45	0	2.87	0	0	3.03	19.02	28.65	36	23.17	20.48	13.63	19.4	12.23	16.35
ARFGAP2	6.13	31.25	22.89	8.73	21.59	23.57	25.81	2.83	7.73	0	7.45	7.48	11.72	16.42	12.43	22.69	8.38	18.16	0	26.3	12.6	3.74	13.07	0	0	6.98	0	3.18	0	10.05	0	3.86	3.63	20.86	18.23	10.5	8.69	25.86	13.63	24.94	18.35	19.26
EIF3K	187.86	456.6	340.8	242.85	404.13	221.11	341.97	213.21	131.34	0	79.76	134.57	74.25	88.25	121.16	150.31	164.47	76.28	81.87	160.88	137.08	93.62	117.61	0	116.47	167.44	67.34	98.64	72.14	101.91	100.67	111.86	199.05	236.17	268.29	247.5	162.21	415.97	197.63	185.66	277.27	401.65
ERCC1	4.6	8.06	19.01	11.63	9.59	4.49	0	2.83	0	0	4.47	29.9	0	28.73	3.11	8.51	20.95	0	0	0	4.73	26.21	8.71	0	0	3.49	5.94	9.55	10.31	8.61	0	11.57	6.66	12.88	16.93	7.5	13.03	6.47	22.15	22.17	13.25	4.67
FBXO22	16.87	18.14	20.3	12.36	14.39	13.47	2.15	18.87	0	0	15.65	22.43	0	16.42	0	36.87	12.57	25.43	0	29.39	14.18	16.85	39.2	0	9.71	9.3	15.84	15.91	0	28.71	0	15.43	13.31	30.06	41.68	10.5	30.41	14.01	33.22	19.4	14.27	20.43
TXNDC15	125.75	226.79	315.75	141.78	188.27	69.59	62.37	133.96	23.18	0	60.38	59.81	46.9	47.2	83.88	56.72	105.81	29.06	0	75.8	66.18	97.37	69.7	0	77.64	20.93	81.2	22.27	72.14	77.51	151.01	42.43	94.99	132.5	57.3	45	124.56	201.52	254.7	135.78	143.73	190.31
CD59	778.27	1623.79	2579.52	2230.75	2108.2	3080.95	7562.1	1041.5	2086.04	110.61	497.17	396.22	1457.71	467.94	773.53	1568.29	1949.57	1678.22	1064.35	1236.02	1443.27	1984.85	2347.91	2538.07	1548.03	60.47	831.82	2497.75	742.03	1142.51	100.67	1033.74	1972.95	3424.75	119.82	569.99	3636.75	2904.27	3212.27	3790.88	4180.43	2908.43
TUFM	95.85	187.48	139.95	99.61	151.1	93.16	159.16	77.36	38.63	0	55.16	37.38	54.71	67.73	93.2	85.08	97.43	87.18	0	63.43	74.05	59.92	108.9	0	43.67	41.86	83.18	12.73	10.31	25.84	50.34	27	47.19	139.86	149.77	142.5	123.11	63.58	73.26	160.72	98.88	116.76
NAXE	41.41	85.67	65.22	68.35	82.74	24.69	15.06	26.41	46.36	0	0.75	67.28	27.36	2.05	3.11	19.85	34.57	3.63	0	3.09	11.03	22.47	13.07	0	0	1.16	53.47	19.09	0	15.79	0	11.57	12.71	67.48	27.35	33	31.86	30.17	23.85	27.71	72.38	51.96
MRPS16	98.15	508	202.58	175.23	242.24	148.15	96.78	218.87	54.08	55.3	70.81	119.61	27.36	18.47	43.49	85.08	123.62	36.33	0	162.43	102.42	50.56	104.55	0	33.97	72.09	87.14	25.45	30.92	99.04	0	84.86	170.01	159.49	145.87	211.5	99.93	255.4	143.11	69.28	211.01	275.55
BAZ2B	32.2	262.06	129.58	90.16	134.31	101.01	165.61	42.45	38.63	0	125.97	44.86	62.53	34.89	27.96	42.54	54.47	39.96	0	80.44	31.51	16.85	30.49	0	58.23	47.68	15.84	54.09	20.61	114.83	0	30.86	188.76	233.71	24.75	117	114.42	148.72	107.33	85.9	76.45	86.4
AMOTL1	9.2	50.4	56.58	39.99	27.58	20.2	43.02	16.04	0	0	22.36	7.48	3.91	6.16	6.21	28.36	4.19	18.16	0	23.2	20.48	56.17	8.71	0	38.82	13.95	7.92	15.91	41.22	7.18	0	0	5.45	57.66	23.44	36	27.52	18.32	17.89	36.02	29.56	34.44
STK17A	17.64	76.6	38.87	26.9	71.95	59.49	40.86	22.64	7.73	55.3	73.05	52.33	35.17	2.05	40.39	11.34	69.14	58.12	0	34.03	9.45	28.09	13.07	0	38.82	0	27.73	0	0	51.67	0	27	26.62	67.48	48.19	46.5	7.24	57.12	68.15	44.34	76.45	60.13
GGCX	9.97	10.08	24.62	8.73	22.78	22.45	15.06	13.21	46.36	0	15.65	0	7.82	43.1	12.43	53.88	17.81	10.9	0	20.11	40.97	16.85	17.42	0	14.56	5.81	21.79	28.64	10.31	12.92	0	3.86	7.87	33.74	11.72	42	20.28	14.01	36.63	47.11	30.58	13.43
HSD17B10	46.77	136.07	138.65	96.7	148.7	49.38	101.09	75.47	61.81	0	8.94	0	15.63	73.88	18.64	14.18	44	43.59	0	58.78	20.48	80.52	69.7	0	0	24.42	45.55	19.09	61.84	14.35	0	46.29	74.42	77.29	58.61	52.5	99.93	94.83	74.11	47.11	106.01	127.27
WBSCR22	233.1	245.94	194.8	345.37	152.3	262.64	139.8	294.34	92.71	0	140.13	231.75	105.52	84.15	93.2	141.8	168.66	123.51	0	205.75	162.29	226.57	117.61	0	160.14	86.05	303.02	162.27	103.06	235.39	100.67	273.86	141.57	259.48	574.35	217.5	127.45	122.85	334.77	329.76	253.82	252.2
UQCRQ	710.79	1150.06	868.19	732.19	756.7	554.46	509.73	695.28	424.93	55.3	108.08	276.61	234.48	143.67	142.9	184.34	229.42	141.67	245.62	552.26	343.49	219.08	313.64	491.24	228.08	137.21	231.72	111.36	288.57	221.04	251.69	204.43	624.37	939.15	290.43	514.49	466.36	1019.46	363.73	426.75	848.11	876.85
TIMM50	30.67	97.77	114.9	46.53	130.71	37.04	105.39	46.23	61.81	0	22.36	29.9	42.99	20.52	49.7	45.38	61.81	36.33	0	38.67	37.81	14.98	43.56	0	33.97	16.28	33.67	9.55	0	21.53	50.34	15.43	24.81	60.12	45.58	70.5	66.62	106.69	59.63	22.17	86.65	94.57
SUPT6H	13.04	40.32	33.69	4.36	25.18	19.08	34.41	4.72	38.63	0	11.18	0	0	18.47	9.32	5.67	17.81	3.63	0	26.3	14.18	9.36	13.07	0	4.85	27.91	11.88	9.55	10.31	5.74	0	15.43	15.13	30.06	18.23	34.5	20.28	31.25	8.52	33.25	17.33	11.68
NDUFV3	213.16	177.4	308.83	228.31	292.61	133.56	133.35	215.09	92.71	55.3	208.71	104.66	93.79	55.41	105.62	119.11	117.33	69.02	81.87	128.4	165.44	159.16	34.85	0	63.09	361.63	132.69	76.36	51.53	143.53	0	96.43	268.63	295.67	196.66	256.5	243.32	272.65	173.77	193.98	226.3	208.41
LRRC1	33.74	24.19	53.99	41.44	40.77	33.67	17.21	61.32	15.45	55.3	70.81	37.38	23.45	24.63	15.53	82.24	41.9	54.49	0	41.77	33.09	41.19	47.92	0	43.67	43.02	33.67	38.18	20.61	55.98	0	50.14	58.08	106.74	6.51	51	82.55	91.6	40.04	74.82	56.07	58.38
ZNF691	13.04	15.12	33.26	13.09	6	8.98	15.06	29.25	7.73	0	2.24	14.95	3.91	0	3.11	11.34	12.57	10.9	0	21.66	11.03	3.74	8.71	0	0	4.65	7.92	6.36	30.92	7.18	0	23.14	26.62	13.5	9.12	10.5	26.07	32.33	15.33	13.86	19.37	21.6
CEBPZOS	48.31	41.33	67.38	42.17	20.39	46.02	23.66	30.19	7.73	0	43.23	67.28	31.26	57.47	27.96	22.69	50.28	14.53	0	32.49	28.36	22.47	43.56	0	0	45.35	39.61	9.55	0	43.06	0	34.71	66.55	52.14	79.45	42	33.31	43.11	68.15	58.19	24.46	61.3
SLC26A6	73.61	32.25	106.26	52.35	122.32	61.73	43.02	47.17	115.89	55.3	38.01	52.33	15.63	16.42	18.64	25.52	88	87.18	0	15.47	25.21	18.72	4.36	0	38.82	23.26	9.9	12.73	0	20.09	0	7.71	42.96	59.5	2.6	49.5	46.35	73.28	81.78	80.36	69.32	118.51
ENTPD1	134.95	104.83	133.04	181.05	161.89	127.95	62.37	138.68	46.36	0	128.21	14.95	93.79	69.78	59.02	45.38	158.19	69.02	0	128.4	85.08	80.52	21.78	81.87	77.64	47.68	23.77	19.09	30.92	80.38	0	46.29	150.65	220.83	71.63	28.5	84	195.05	155.89	121.93	114.17	197.9
ATP6V0B	699.29	942.42	851.78	1158.27	751.9	447.83	382.84	1029.24	834.41	165.91	254.92	515.83	508.05	211.39	295.12	331.81	460.94	167.1	163.75	572.38	316.7	202.23	187.31	409.37	262.05	273.26	267.37	213.18	226.73	238.26	201.35	289.29	370.87	1131.77	567.84	539.99	330.22	789.92	899.54	410.12	735.98	1081.76
CCT6A	53.67	154.21	163.7	95.25	151.1	144.79	60.22	76.41	15.45	55.3	35.03	44.86	58.62	43.1	71.45	59.56	159.23	58.12	0	64.97	83.51	61.79	91.48	0	53.38	45.35	37.63	38.18	30.92	22.97	0	127.29	47.19	125.14	76.84	192	76.76	112.08	108.18	113.62	106.01	91.65
PSMD2	60.57	86.68	98.91	58.9	103.13	98.77	79.58	52.83	15.45	0	27.58	119.61	31.26	34.89	21.75	39.7	51.33	25.43	81.87	51.05	36.24	14.98	47.92	0	14.56	27.91	21.79	12.73	72.14	24.4	50.34	30.86	18.76	94.47	80.75	52.5	76.76	159.49	55.37	47.11	35.68	84.65
KPNA4	33.74	28.22	19.44	31.99	29.98	24.69	45.17	35.85	15.45	0	17.89	0	19.54	30.79	27.96	11.34	33.52	32.69	0	18.56	14.18	3.74	30.49	0	9.71	30.23	3.96	0	41.22	15.79	0	3.86	14.52	57.66	15.63	13.5	36.21	52.8	23.85	16.63	30.58	36.78
RARS	30.67	57.45	93.3	63.98	70.75	67.34	30.11	43.4	15.45	0	21.62	22.43	7.82	67.73	55.92	36.87	37.71	29.06	0	32.49	42.54	69.28	47.92	0	4.85	29.07	27.73	50.91	82.45	55.98	50.34	42.43	41.75	85.88	42.98	90	53.59	58.19	86.04	58.19	48.93	79.4
YIF1B	2.3	10.08	34.12	15.27	14.39	5.61	2.15	5.66	15.45	0	3.73	0	3.91	16.42	9.32	39.7	12.57	7.27	0	4.64	23.63	7.49	13.07	0	4.85	8.14	5.94	3.18	30.92	5.74	0	0	15.13	19.63	16.93	13.5	11.59	15.09	23.85	16.63	14.27	14.01
ITGB1BP1	52.14	35.28	38.87	45.08	14.39	30.3	25.81	12.26	23.18	0	9.69	22.43	11.72	30.79	21.75	17.02	11.52	25.43	0	6.19	20.48	48.68	30.49	0	53.38	40.7	9.9	22.27	20.61	14.35	0	54	31.46	42.94	54.7	24	27.52	47.42	57.07	49.88	18.35	30.94
TMED7	35.27	44.35	92.87	21.81	77.95	31.43	12.9	29.25	23.18	0	26.09	22.43	42.99	61.57	77.66	79.41	81.71	58.12	0	27.85	42.54	46.81	39.2	0	19.41	13.95	25.75	15.91	10.31	21.53	100.67	27	47.19	49.69	35.16	58.5	55.04	77.59	62.18	105.3	63.2	60.71
MTFR1	2.3	8.06	3.02	5.09	14.39	0	4.3	5.66	7.73	0	5.22	0	3.91	2.05	9.32	11.34	9.43	7.27	0	3.09	14.18	11.23	17.42	0	14.56	8.14	1.98	15.91	10.31	14.35	0	38.57	6.66	13.5	15.63	18	2.9	7.54	18.74	19.4	7.14	12.26
C15orf40	30.67	27.21	39.31	29.08	59.96	51.63	32.26	15.09	0	0	15.65	29.9	3.91	8.21	15.53	22.69	28.28	3.63	0	30.94	59.87	13.11	52.27	0	14.56	40.7	37.63	15.91	51.53	22.97	0	30.86	21.78	25.76	62.51	39	24.62	30.17	59.63	8.31	55.05	57.21
MRPL15	75.91	428.37	265.21	80.71	279.41	143.67	195.72	125.47	154.52	0	64.1	179.42	66.44	82.09	77.66	172.99	125.71	65.39	245.62	51.05	217.44	110.48	91.48	0	140.73	116.28	166.36	89.09	51.53	97.6	0	243	111.93	153.97	246.15	335.99	107.18	149.79	148.22	149.64	384.3	265.04
TIMM10	16.1	60.48	79.04	38.54	37.18	37.04	17.21	14.15	38.63	0	23.85	37.38	11.72	26.68	59.02	36.87	11.52	0	0	7.73	26.79	13.11	13.07	0	63.09	12.79	27.73	19.09	20.61	35.88	50.34	50.14	25.41	46.62	69.03	49.5	30.41	33.41	31.52	19.4	39.76	89.32
ELL	19.17	16.13	31.96	21.09	13.19	15.71	19.36	21.7	23.18	0	37.27	0	15.63	30.79	34.17	31.2	24.09	25.43	0	10.83	9.45	9.36	13.07	81.87	9.71	31.4	23.77	0	0	20.09	0	7.71	61.71	44.78	39.07	39	23.17	28.02	11.07	30.48	46.89	33.28
LOC101929128	312.07	157.24	330	171.6	147.5	159.38	124.74	166.04	77.26	0	114.04	134.57	109.43	32.84	18.64	133.29	128.85	119.87	0	139.23	138.65	168.52	60.98	163.75	77.64	231.4	138.64	101.82	103.06	157.89	50.34	327.86	193.6	302.42	272.2	253.5	126	192.9	187.4	182.89	300.71	193.82
URM1	10.73	35.28	42.33	8.73	17.99	13.47	4.3	9.43	0	0	9.69	22.43	15.63	18.47	34.17	25.52	14.67	3.63	0	13.92	20.48	9.36	26.14	0	14.56	11.63	1.98	6.36	0	1.44	0	3.86	9.68	14.11	14.33	18	11.59	31.25	23.85	22.17	33.64	12.84
TMEM43	124.98	130.02	144.7	94.52	115.12	69.59	94.63	81.13	54.08	0	53.67	59.81	11.72	67.73	46.6	36.87	50.28	39.96	0	116.02	28.36	41.19	39.2	0	121.32	16.28	41.59	6.36	20.61	5.74	50.34	7.71	18.15	135.57	57.3	46.5	60.83	114.23	52.81	69.28	161.06	103.33
SYNGR2	55.97	42.33	141.68	144.69	80.35	138.05	53.77	100.94	38.63	0	102.12	29.9	54.71	94.41	208.14	141.8	48.19	18.16	0	109.83	58.3	73.03	95.83	0	164.99	67.44	39.61	57.27	61.84	25.84	50.34	19.29	66.55	136.18	39.07	81	84	156.26	119.26	149.64	205.91	95.16
RCN1	198.59	241.91	605.58	379.55	358.56	560.07	481.77	301.88	231.78	276.52	314.55	261.65	996.56	190.87	372.79	621.08	173.9	79.92	163.75	191.82	456.93	239.68	252.65	327.49	397.92	18.6	194.09	92.27	20.61	279.89	0	173.57	331.55	933.02	343.83	295.5	425.81	481.71	551.14	473.86	407.75	454.77
PRMT2	75.91	112.89	70.84	113.43	16.79	38.16	49.47	34.91	7.73	0	36.52	7.48	19.54	18.47	74.56	19.85	38.76	10.9	0	85.08	7.88	16.85	47.92	0	19.41	63.95	33.67	12.73	0	33.01	100.67	23.14	148.23	84.65	49.49	28.5	81.11	66.81	41.74	55.42	120.29	68.3
STYXL1	78.98	132.04	129.58	194.86	143.9	52.75	88.18	106.6	61.81	110.61	58.14	7.48	62.53	34.89	74.56	59.56	63.9	39.96	0	134.59	108.72	59.92	43.56	0	43.67	122.09	79.22	38.18	20.61	109.08	100.67	50.14	164.56	134.34	74.24	114	133.25	70.05	124.37	83.13	193.68	219.5
FAM3A	13.04	48.38	38.44	13.81	35.98	21.33	21.51	10.38	61.81	0	11.18	0	7.82	8.21	24.85	19.85	29.33	18.16	0	13.92	20.48	7.49	13.07	0	9.71	13.95	17.82	3.18	0	14.35	0	3.86	12.1	46.01	22.14	16.5	31.86	19.4	16.18	19.4	37.72	19.26
MFSD14B	9.97	11.09	7.77	16	13.19	2.24	4.3	9.43	0	0	26.09	22.43	0	26.68	0	25.52	19.9	18.16	0	23.2	11.03	7.49	0	0	14.56	6.98	21.79	9.55	0	18.66	0	15.43	2.42	27.6	10.42	25.5	11.59	17.24	15.33	13.86	6.12	25.1
GSDMD	7.67	62.49	41.9	26.18	57.56	35.92	62.37	21.7	38.63	0	11.18	0	0	16.42	9.32	11.34	14.67	3.63	0	30.94	4.73	5.62	13.07	0	0	0	0	25.45	10.31	1.44	50.34	7.71	15.73	28.22	27.35	9	37.66	18.32	17.89	38.8	42.81	39.7
YIF1A	143.39	1041.2	599.96	287.21	548.04	295.19	187.12	199.05	154.52	110.61	61.12	186.9	156.32	348.9	242.31	482.11	237.8	225.22	81.87	205.75	367.12	176.01	126.33	409.37	126.17	75.58	162.4	120.91	175.2	63.15	0	216	76.84	399.95	32.56	328.49	217.25	421.36	436.14	606.87	536.19	514.9
ATOX1	113.48	166.31	153.34	257.39	129.51	97.65	120.44	133.02	115.89	0	144.6	52.33	66.44	324.27	167.75	73.74	45.05	79.92	81.87	148.51	119.75	61.79	213.45	0	48.53	151.16	271.33	54.09	206.12	88.99	0	115.72	175.45	279.72	281.31	199.5	108.62	191.82	194.22	169.04	203.87	132.52
BORCS7	44.47	92.73	155.07	58.17	173.88	150.4	361.33	82.07	46.36	0	17.14	29.9	23.45	18.47	90.09	87.91	61.81	43.59	0	43.31	48.84	13.11	87.12	0	33.97	40.7	65.36	38.18	20.61	30.14	100.67	127.29	116.77	212.86	46.89	87	86.9	113.15	109.03	119.16	127.42	115.01
RABAC1	355.78	807.36	1076.39	300.29	412.53	338.96	462.42	400	594.91	0	137.15	194.37	269.66	398.16	366.57	482.11	305.9	159.83	245.62	377.46	323	271.51	222.16	409.37	325.13	84.88	235.68	140	278.26	147.84	50.34	200.58	427.74	508.53	184.94	147	504.02	830.87	592.88	529.28	858.31	615.31
PMM2	36.8	117.93	180.12	55.99	154.7	142.54	51.62	42.45	69.53	0	14.91	37.38	11.72	43.1	83.88	136.13	74.38	43.59	0	49.5	39.39	63.66	47.92	0	82.5	39.54	41.59	70	30.92	12.92	0	34.71	17.55	89.56	87.26	73.5	47.79	121.77	102.22	83.13	138.63	62.47
RABIF	105.05	137.08	148.15	130.88	93.54	80.81	111.84	49.06	77.26	0	35.78	74.76	42.99	32.84	52.81	39.7	73.33	18.16	0	30.94	96.11	39.32	100.19	0	29.12	38.37	122.79	28.64	144.28	93.3	0	142.72	104.06	136.79	92.47	160.5	55.04	70.05	103.07	80.36	119.27	185.64
MRPL47	16.87	21.17	25.92	16	17.99	25.81	19.36	12.26	0	0	8.2	0	3.91	30.79	21.75	19.85	28.28	7.27	0	17.02	11.03	22.47	34.85	0	0	11.63	15.84	31.82	72.14	18.66	0	15.43	15.73	27.6	32.56	39	4.34	25.86	38.33	11.08	23.45	36.78
GABARAPL1	39.87	152.2	216.83	80.71	122.32	83.06	292.5	66.04	77.26	55.3	91.68	59.81	132.87	41.05	80.77	79.41	59.71	39.96	163.75	52.6	20.48	16.85	52.27	0	9.71	156.98	61.4	19.09	51.53	45.93	50.34	38.57	116.16	133.11	88.56	93	42	125.01	94.55	149.64	222.22	209
CBWD1	99.68	57.45	80.34	78.53	65.96	59.49	98.94	57.55	7.73	0	12.67	7.48	7.82	12.31	40.39	17.02	39.81	25.43	81.87	41.77	31.51	26.21	74.05	0	24.26	13.95	55.45	31.82	10.31	30.14	100.67	38.57	34.49	72.38	63.82	43.5	63.73	45.26	73.26	52.65	62.18	123.76
GLA	77.44	107.85	62.2	93.07	145.1	89.79	103.24	128.3	38.63	0	86.46	52.33	85.98	16.42	12.43	96.42	71.24	101.71	0	64.97	92.96	29.96	65.34	0	24.26	18.6	65.36	44.55	10.31	73.2	0	34.71	65.95	98.76	109.4	64.5	49.24	159.49	80.07	63.74	90.72	146.53
NDUFB8	241.53	265.09	234.97	415.17	295	152.64	137.65	214.15	100.44	110.61	70.81	74.76	152.41	176.5	189.5	133.29	147.71	83.55	81.87	163.98	204.83	176.01	317.99	0	106.76	211.63	235.68	89.09	608.05	294.24	100.67	424.29	320.05	365.6	161.5	431.99	379.46	227.38	224.88	157.95	545.36	376.54
ZMPSTE24	21.47	50.4	38.01	16.72	58.76	24.69	43.02	31.13	0	55.3	10.44	7.48	7.82	32.84	40.39	19.85	23.05	18.16	81.87	23.2	58.3	28.09	43.56	0	4.85	3.49	21.79	3.18	10.31	27.27	0	54	7.87	42.94	22.14	51	26.07	56.04	60.48	72.05	18.35	32.11
DERL1	75.91	86.68	193.51	114.88	131.91	163.87	53.77	88.68	23.18	55.3	59.63	29.9	27.36	67.73	43.49	42.54	46.09	0	0	77.35	40.97	56.17	30.49	0	4.85	25.58	45.55	9.55	41.22	15.79	0	30.86	72	112.26	48.19	81	28.97	95.91	69	66.51	148.83	119.09
ATP6V1F	346.58	651.13	1290.63	522.79	1433.05	1295.23	845.25	359.43	363.13	276.52	470.34	201.85	1219.32	172.4	493.94	246.73	287.04	363.25	327.49	349.61	228.46	275.26	257.01	163.75	169.85	354.66	295.1	273.64	371.02	434.9	0	443.58	1168.89	1044.66	188.85	413.99	666.23	778.06	740.24	853.5	1358.82	945.73
INO80D	65.94	26.21	41.9	29.08	26.38	49.38	45.17	29.25	15.45	0	5.96	22.43	7.82	16.42	21.75	19.85	20.95	14.53	0	18.56	3.15	5.62	13.07	0	19.41	17.44	13.86	3.18	20.61	4.31	0	23.14	47.19	32.51	14.33	28.5	43.45	40.95	21.3	13.86	47.91	40.28
HEATR5A	40.64	162.28	166.3	64.71	103.13	41.53	83.88	120.75	100.44	0	16.4	52.33	11.72	12.31	24.85	62.39	37.71	14.53	0	23.2	59.87	11.23	8.71	0	0	36.05	71.3	35	10.31	43.06	0	23.14	33.88	80.97	31.26	70.5	49.24	72.2	101.37	88.68	64.22	84.07
BCAP29	566.64	303.39	217.7	482.8	243.44	180.7	303.26	298.11	146.8	55.3	245.23	201.85	152.41	92.36	121.16	232.55	268.18	156.2	0	352.71	167.02	151.67	126.33	0	145.58	350	106.95	165.46	133.98	252.62	0	115.72	323.68	352.72	65.12	611.99	318.63	282.34	304.96	238.32	359.84	371.29
TMBIM4	220.83	213.68	191.35	324.29	274.62	180.7	163.46	242.45	30.9	331.82	166.97	149.52	101.61	197.03	142.9	107.77	205.33	116.24	245.62	292.38	129.2	290.24	470.45	245.62	14.56	93.02	293.12	194.09	72.14	272.71	151.01	73.29	300.09	456.39	407.65	208.5	221.59	197.21	429.32	321.45	226.3	361.95
TMEM234	84.34	30.24	20.73	46.53	21.59	30.3	2.15	45.28	7.73	0	19.38	0	23.45	18.47	24.85	2.84	13.62	29.06	0	77.35	15.76	43.07	34.85	0	38.82	5.81	33.67	9.55	0	12.92	0	3.86	26.02	44.78	29.95	39	21.72	60.35	26.41	11.08	47.91	32.69
IPO7	52.91	19.15	33.26	23.27	17.99	14.59	27.96	17.92	30.9	0	36.52	7.48	74.25	18.47	18.64	36.87	56.57	36.33	0	13.92	25.21	44.94	30.49	0	87.35	1.16	15.84	28.64	20.61	31.58	0	34.71	36.91	84.04	24.75	22.5	44.9	47.42	57.07	49.88	25.48	31.52
NDUFB2	253.03	609.8	514.44	375.91	392.14	189.68	498.98	286.79	254.96	110.61	54.41	194.37	101.61	256.54	152.22	53.88	103.71	76.28	0	180.99	103.99	136.69	383.33	0	33.97	48.84	273.31	60.46	309.18	107.65	0	231.43	297.06	484.61	151.08	274.5	257.8	354.55	188.26	227.23	493.37	434.92
THOC7	93.55	73.58	82.07	95.25	98.33	89.79	49.47	85.85	30.9	0	74.54	22.43	19.54	34.89	55.92	39.7	83.81	54.49	0	69.61	55.15	37.45	56.63	163.75	14.56	131.4	29.71	25.45	61.84	86.12	0	7.71	81.68	130.05	50.79	64.5	128.9	72.2	103.92	94.22	95.82	77.64
DNAJC1	286	303.39	430.21	321.38	152.3	186.32	103.24	356.6	92.71	276.52	412.94	52.33	324.37	203.18	447.34	255.24	174.95	177.99	0	352.71	129.2	284.62	287.5	0	97.05	319.77	261.43	44.55	82.45	173.67	100.67	123.43	270.44	502.4	268.29	219	194.08	352.39	289.62	520.97	223.24	470.53
SRSF5	92.01	106.84	278.17	112.7	76.75	352.43	152.7	161.32	131.34	110.61	166.22	224.28	511.96	41.05	245.42	195.68	328.94	116.24	163.75	91.27	124.47	101.11	313.64	81.87	164.99	411.63	346.59	194.09	92.75	277.02	251.69	196.72	189.97	291.99	106.8	322.5	288.22	184.28	556.25	379.64	408.77	206.08
ALG8	78.98	52.41	85.52	106.16	81.55	55	66.67	114.15	30.9	110.61	17.14	59.81	19.54	41.05	59.02	34.03	47.14	32.69	0	66.52	77.21	18.72	8.71	0	0	1.16	41.59	22.27	20.61	30.14	0	23.14	62.32	99.99	59.91	45	91.24	68.97	60.48	19.4	62.18	119.09
FNDC3B	240	59.47	199.99	256.67	225.45	164.99	43.02	161.32	61.81	55.3	263.87	74.76	58.62	215.5	167.75	62.39	231.52	119.87	163.75	97.46	23.63	119.84	117.61	0	101.91	160.47	57.43	50.91	216.43	156.45	50.34	104.14	133.1	178.51	79.45	168	254.91	183.2	253.85	160.72	204.89	318.75
UBA6	24.54	14.11	26.78	29.08	26.38	22.45	19.36	28.3	0	0	28.32	22.43	19.54	28.73	21.75	28.36	41.9	32.69	0	9.28	14.18	18.72	26.14	0	9.71	22.09	21.79	22.27	0	33.01	0	11.57	42.35	43.55	27.35	40.5	23.17	34.48	25.56	27.71	24.46	29.19
AP3M1	16.1	5.04	9.07	13.81	8.39	5.61	8.6	11.32	7.73	0	8.2	0	3.91	16.42	21.75	14.18	8.38	10.9	0	7.73	12.6	11.23	17.42	0	4.85	1.16	7.92	0	41.22	7.18	0	3.86	8.47	17.79	18.23	16.5	13.03	10.78	9.37	19.4	9.17	10.51
TTI1	13.04	11.09	21.16	14.54	15.59	14.59	12.9	9.43	7.73	0	7.45	0	11.72	8.21	3.11	11.34	6.29	7.27	0	18.56	1.58	3.74	8.71	0	4.85	10.47	11.88	0	0	11.48	0	7.71	8.47	19.02	13.02	4.5	13.03	5.39	8.52	19.4	13.25	15.76
LOC105369340	280.64	181.43	360.24	240.67	107.93	312.02	118.29	196.22	54.08	55.3	163.98	112.14	168.05	75.94	40.39	79.41	93.24	65.39	245.62	262.98	85.08	250.91	17.42	0	67.94	190.7	154.48	73.18	0	219.6	0	96.43	311.58	242.3	143.26	262.5	194.08	63.58	288.77	360.24	178.39	256.87
PRPSAP1	37.57	12.1	9.5	24.72	10.79	20.2	17.21	13.21	23.18	0	8.94	7.48	15.63	45.15	40.39	2.84	24.09	18.16	0	23.2	15.76	18.72	60.98	0	4.85	20.93	21.79	6.36	10.31	14.35	0	7.71	27.23	38.65	32.56	13.5	15.93	25.86	19.59	27.71	35.68	29.77
ABCA5	49.84	80.64	56.58	42.17	62.36	62.85	47.32	17.92	30.9	0	19.38	29.9	42.99	0	6.21	11.34	60.76	7.27	0	40.22	18.91	59.92	17.42	0	4.85	26.74	39.61	38.18	0	20.09	0	23.14	64.13	92.01	40.37	28.5	27.52	40.95	47.7	49.88	46.89	42.62
PIN4	92.01	60.48	95.46	112.7	99.53	78.57	68.82	53.77	38.63	0	38.76	97.19	19.54	22.58	27.96	8.51	68.09	25.43	0	72.71	50.42	39.32	108.9	81.87	19.41	81.4	61.4	76.36	61.84	87.55	50.34	23.14	129.47	131.27	102.89	91.5	65.17	73.28	89.44	44.34	78.49	151.78
PRKDC	16.87	54.43	32.83	19.63	49.17	80.81	36.56	19.81	15.45	0	21.62	37.38	54.71	51.31	59.02	73.74	67.05	50.86	0	13.92	40.97	58.05	47.92	0	0	61.63	29.71	12.73	0	28.71	0	19.29	12.71	47.23	74.24	66	63.73	17.24	64.74	49.88	32.62	36.19
SIGMAR1	12.27	35.28	62.2	42.17	104.33	22.45	60.22	30.19	38.63	0	11.93	29.9	42.99	20.52	9.32	36.87	61.81	7.27	0	29.39	25.21	20.6	30.49	0	0	5.81	23.77	19.09	0	1.44	0	23.14	26.02	58.28	27.35	48	18.83	16.16	46.85	41.57	37.72	57.21
TFG	228.5	404.18	627.17	352.64	527.65	451.2	322.62	533.01	92.71	0	114.04	119.61	160.23	242.18	267.16	320.46	238.85	177.99	0	428.51	196.95	239.68	161.17	81.87	184.4	220.93	170.32	200.46	123.67	277.02	0	208.29	310.98	250.28	304.76	322.5	490.98	493.56	402.92	238.32	458.72	407.48
STRA6	22.24	69.55	129.15	47.99	26.38	81.93	103.24	13.21	30.9	55.3	29.82	127.09	74.25	0	31.07	79.41	101.62	72.65	81.87	34.03	20.48	39.32	0	0	58.23	38.37	43.57	41.36	0	15.79	50.34	46.29	40.54	68.09	88.56	75	57.93	39.87	57.07	108.07	133.54	49.04
OXA1L	23.77	67.53	69.54	21.09	47.97	16.84	38.71	46.23	15.45	55.3	24.6	22.43	50.8	6.16	12.43	0	15.71	7.27	0	20.11	3.15	43.07	21.78	0	0	15.12	23.77	6.36	0	21.53	50.34	23.14	27.83	36.19	69.03	19.5	28.97	37.72	39.18	19.4	41.79	44.37
ARL1	144.15	173.37	367.58	124.33	266.22	103.26	135.5	186.79	69.53	0	74.54	52.33	42.99	116.98	77.66	167.32	176	83.55	245.62	92.82	160.71	144.18	60.98	0	43.67	80.23	71.3	63.64	144.28	88.99	0	131.15	86.52	99.99	138.05	156	139.04	254.33	225.74	243.86	103.98	229.43
NDUFB11	214.69	337.66	528.69	247.21	261.43	249.17	210.78	218.87	231.78	110.61	210.94	156.99	183.68	262.7	232.99	167.32	222.09	94.45	81.87	252.15	159.14	237.81	121.97	0	155.29	146.51	207.95	136.82	123.67	143.53	151.01	46.29	393.86	314.07	221.4	235.5	289.67	406.27	257.25	263.26	361.88	383.55
PYM1	19.17	37.29	44.06	39.26	32.38	20.2	27.96	35.85	0	0	26.83	22.43	23.45	14.37	49.7	25.52	38.76	18.16	0	29.39	22.06	35.58	13.07	0	9.71	26.74	21.79	15.91	20.61	33.01	0	23.14	61.11	39.87	39.07	52.5	21.72	56.04	34.93	22.17	29.56	35.03
SEPHS1	9.2	32.25	19.87	37.81	17.99	7.86	4.3	26.41	0	0	5.22	22.43	3.91	12.31	6.21	5.67	10.48	0	0	23.2	17.33	20.6	8.71	0	0	16.28	9.9	9.55	20.61	8.61	0	27	13.31	22.7	14.33	22.5	10.14	26.94	16.18	13.86	19.37	20.43
YIPF3	92.78	133.05	241.02	202.86	203.86	99.89	159.16	151.89	61.81	0	55.16	7.48	31.26	135.46	158.43	209.86	68.09	61.75	81.87	162.43	69.33	82.39	100.19	0	97.05	86.05	29.71	63.64	41.22	33.01	0	50.14	108.3	196.3	71.63	75	110.07	177.81	129.48	182.89	197.76	148.28
IER3IP1	258.4	362.86	308.4	147.6	236.24	211.01	122.59	218.87	69.53	0	137.9	269.13	42.99	162.14	170.86	258.07	328.94	210.69	245.62	187.18	231.62	318.32	95.83	0	164.99	210.47	233.7	203.64	61.84	205.25	50.34	185.15	158.51	151.52	403.74	349.49	86.9	232.77	393.55	407.35	218.14	288.39
UTP18	26.84	54.43	79.91	51.62	55.16	32.55	58.07	66.98	69.53	0	26.09	7.48	19.54	55.41	68.34	73.74	28.28	54.49	0	64.97	56.72	26.21	21.78	0	24.26	18.6	45.55	47.73	10.31	47.37	0	42.43	55.66	26.38	83.35	58.5	73.86	54.96	45.15	49.88	89.7	56.04
CTDSPL2	151.82	84.67	70.41	91.61	106.73	32.55	81.73	50	7.73	55.3	34.29	0	19.54	55.41	43.49	28.36	31.43	0	0	43.31	40.97	14.98	13.07	0	33.97	86.05	43.57	50.91	72.14	24.4	0	38.57	133.71	111.64	96.38	31.5	39.1	92.68	79.22	63.74	60.14	64.8
ABCF3	1.53	13.1	23.32	8	14.39	10.1	17.21	9.43	0	0	9.69	0	15.63	16.42	21.75	11.34	8.38	14.53	0	10.83	17.33	9.36	4.36	0	14.56	22.09	0	3.18	0	5.74	0	15.43	10.29	15.34	11.72	21	7.24	16.16	23	13.86	11.21	8.17
GPC3	966.13	394.1	871.22	956.87	563.62	1113.41	877.51	1444.33	270.41	276.52	725.26	164.47	664.37	219.6	403.85	252.4	195.9	919.02	0	1027.18	1293.58	810.79	505.3	163.75	1489.79	254.65	1160.58	875.01	61.84	795.17	201.35	636.44	566.29	1125.63	571.75	790.49	1358.53	840.57	891.02	1127.84	944.95	1094.6
IDH3B	62.11	103.82	119.65	122.15	116.32	75.2	68.82	83.02	38.63	0	14.91	14.95	39.08	43.1	71.45	68.06	31.43	29.06	0	29.39	17.33	22.47	30.49	81.87	33.97	20.93	27.73	60.46	0	5.74	0	34.71	62.92	53.37	58.61	82.5	102.83	78.67	40.89	27.71	89.7	98.08
CREB3L2	45.24	118.94	97.62	80.71	94.74	58.36	79.58	81.13	30.9	0	66.34	29.9	42.99	47.2	86.98	133.29	86.95	127.14	0	26.3	80.36	52.43	82.76	245.62	29.12	59.3	19.81	35	20.61	34.45	0	92.57	64.74	110.42	35.16	132	36.21	82.98	121.81	113.62	137.61	119.09
NDUFA4	246.9	732.77	663.02	522.06	1111.66	211.01	221.53	398.11	285.86	331.82	317.53	523.31	238.39	357.11	304.44	416.89	261.9	330.56	409.37	245.97	546.74	456.89	387.69	491.24	194.11	150	619.9	159.09	597.75	460.74	302.02	543.87	473.12	677.22	448.02	587.99	322.98	837.33	695.1	260.48	859.33	886.19
CETN2	51.37	90.71	46.22	78.53	88.74	1.12	55.92	47.17	30.9	0	34.29	0	7.82	51.31	31.07	28.36	12.57	14.53	0	72.71	23.63	44.94	21.78	0	0	8.14	39.61	12.73	51.53	25.84	0	0	33.28	41.1	39.07	16.5	44.9	63.58	40.89	33.25	76.45	58.38
MFSD8	25.3	7.06	37.15	32.72	26.38	23.57	19.36	31.13	30.9	0	16.4	59.81	11.72	8.21	6.21	2.84	23.05	0	0	27.85	26.79	11.23	8.71	0	4.85	39.54	13.86	38.18	20.61	18.66	0	11.57	24.2	32.51	19.54	28.5	17.38	38.8	31.52	22.17	24.46	35.61
FAM136A	49.07	30.24	60.04	74.16	45.57	21.33	21.51	53.77	0	0	15.65	82.23	23.45	67.73	18.64	25.52	42.95	7.27	0	41.77	20.48	41.19	56.63	0	19.41	19.77	41.59	15.91	113.37	51.67	0	38.57	53.24	58.28	52.1	58.5	70.97	49.57	40.04	41.57	44.85	58.38
OSGEP	11.5	27.21	24.19	3.64	27.58	5.61	21.51	5.66	7.73	0	8.2	0	23.45	18.47	6.21	19.85	10.48	10.9	0	3.09	14.18	7.49	52.27	0	0	13.95	11.88	6.36	0	12.92	0	0	14.52	17.18	15.63	7.5	11.59	24.79	22.15	24.94	13.25	14.59
PARK7	120.38	362.86	272.98	277.03	211.06	122.34	195.72	258.49	278.14	0	111.06	358.84	140.69	229.86	195.71	266.58	265.04	138.04	163.75	128.4	289.91	247.17	278.79	409.37	111.61	174.42	287.17	92.27	298.87	231.09	151.01	165.86	180.9	360.08	332.11	457.49	215.8	229.54	409.73	241.09	313.97	319.33
PSMD5-AS1	29.9	54.43	36.28	19.63	21.59	14.59	19.36	30.19	7.73	0	17.89	22.43	23.45	20.52	0	2.84	29.33	25.43	0	21.66	6.3	5.62	17.42	0	0	34.88	13.86	6.36	30.92	11.48	0	0	26.62	22.08	22.14	21	15.93	30.17	39.18	24.94	16.31	33.86
NMD3	43.71	71.56	78.61	37.81	73.15	57.24	12.9	40.57	15.45	0	38.76	29.9	11.72	34.89	34.17	34.03	42.95	36.33	0	40.22	18.91	52.43	34.85	0	4.85	55.81	35.65	22.27	10.31	51.67	0	73.29	44.77	80.36	69.03	57	39.1	19.4	63.89	58.19	23.45	55.46
MPV17	103.51	91.72	119.65	70.53	98.33	26.94	77.43	108.49	23.18	0	87.21	104.66	31.26	65.68	46.6	51.05	89.05	76.28	0	160.88	116.6	78.64	91.48	0	101.91	109.3	134.68	41.36	72.14	55.98	0	57.86	99.83	71.16	123.73	159	84	148.72	105.63	63.74	89.7	131.35
USO1	112.71	255.01	195.24	193.41	248.23	76.32	137.65	278.3	115.89	55.3	87.96	119.61	66.44	82.09	121.16	170.16	83.81	83.55	0	198.01	130.78	80.52	30.49	0	82.5	103.49	31.69	85.91	41.22	51.67	0	50.14	137.34	201.2	78.14	112.5	123.11	231.69	166.11	138.56	174.31	203.74
SPG21	39.11	46.37	51.83	52.35	103.13	66.22	79.58	59.43	15.45	0	48.45	89.71	132.87	30.79	40.39	39.7	39.81	79.92	0	46.41	42.54	11.23	43.56	81.87	33.97	39.54	53.47	22.27	0	15.79	0	27	39.33	83.43	65.12	63	43.45	47.42	106.48	66.51	50.97	73.56
PFDN2	180.19	211.67	209.92	232.67	230.25	160.5	146.25	252.83	123.62	0	86.46	209.32	93.79	141.61	80.77	93.59	226.28	112.61	0	160.88	220.59	97.37	87.12	81.87	53.38	239.54	225.78	98.64	257.65	248.31	201.35	277.72	106.48	200.59	315.18	355.49	59.38	190.74	207	227.23	232.42	308.24
STRAP	36.8	102.81	107.98	61.8	92.34	79.69	81.73	61.32	15.45	276.52	35.78	59.81	27.36	59.52	77.66	76.57	68.09	50.86	0	69.61	80.36	44.94	95.83	81.87	33.97	52.33	43.57	70	82.45	63.15	0	81	38.72	80.36	114.61	121.5	59.38	86.21	98.81	169.04	78.49	91.07
AK2	155.65	430.39	444.46	216.68	566.02	236.82	301.11	242.45	154.52	221.21	44.72	231.75	42.99	127.25	195.71	110.6	166.57	39.96	327.49	143.87	241.07	101.11	100.19	0	82.5	39.54	172.3	114.55	61.84	100.47	100.67	246.86	121.61	236.17	226.61	448.49	214.35	295.28	192.51	94.22	360.86	318.75
ATPAF2	26.07	21.17	25.48	29.81	23.98	30.3	4.3	19.81	15.45	0	19.38	29.9	70.35	32.84	0	14.18	6.29	10.9	0	27.85	12.6	20.6	8.71	0	0	12.79	7.92	12.73	30.92	14.35	0	0	20.57	34.97	33.86	7.5	24.62	19.4	18.74	30.48	23.45	29.77
RER1	161.02	533.2	470.81	279.93	619.99	270.49	288.2	225.47	208.6	55.3	320.52	381.27	203.22	194.97	180.18	414.05	187.52	239.75	81.87	283.09	415.96	312.71	287.5	81.87	92.2	412.8	273.31	159.09	350.4	256.92	151.01	293.15	307.35	299.96	158.89	494.99	285.32	329.76	408.88	412.9	620.8	628.15
TMED4	298.27	271.14	399.54	498.06	263.82	361.41	178.51	487.73	108.16	276.52	223.62	179.42	171.95	75.94	121.16	221.21	181.23	61.75	0	346.52	255.25	254.66	252.65	0	300.87	62.79	186.17	124.09	51.53	133.48	0	165.86	263.79	434.3	183.64	190.5	221.59	304.97	353.51	152.41	490.32	410.99
RPP14	36.04	42.33	61.77	46.53	87.54	32.55	32.26	54.72	15.45	0	20.87	22.43	3.91	32.84	40.39	0	19.9	7.27	0	38.67	17.33	24.34	39.2	0	0	12.79	9.9	44.55	41.22	4.31	0	3.86	44.17	40.49	37.77	22.5	27.52	47.42	34.93	30.48	41.79	54.88
ERLIN2	36.8	52.41	62.63	81.44	74.35	84.18	21.51	58.49	54.08	55.3	42.49	0	35.17	22.58	34.17	2.84	46.09	87.18	0	32.49	100.84	93.62	17.42	0	29.12	20.93	59.42	22.27	0	43.06	50.34	46.29	32.67	99.99	59.91	40.5	50.69	52.8	53.67	55.42	61.16	90.49
MCL1	24.54	34.27	57.88	55.26	47.97	31.43	36.56	45.28	30.9	0	49.2	67.28	15.63	41.05	62.13	34.03	33.52	69.02	163.75	34.03	29.94	29.96	30.49	81.87	53.38	31.4	37.63	44.55	20.61	47.37	50.34	42.43	73.81	60.12	67.72	109.5	37.66	43.11	63.04	63.74	60.14	102.75
CSRNP1	9.2	32.25	37.15	18.18	16.79	24.69	17.21	14.15	38.63	0	55.9	14.95	15.63	6.16	37.28	8.51	30.38	39.96	0	12.38	9.45	14.98	21.78	0	24.26	9.3	31.69	12.73	0	20.09	50.34	19.29	36.3	39.87	33.86	24	14.48	22.63	39.18	24.94	39.76	35.03
NDUFS6	213.93	409.22	430.64	297.38	214.66	131.32	296.81	255.66	448.11	0	42.49	97.19	128.97	71.83	155.33	241.06	184.38	101.71	245.62	239.78	222.16	63.66	65.34	0	63.09	134.89	51.49	140	0	111.95	50.34	185.15	213.57	295.67	149.77	237	211.46	307.13	183.14	113.62	311.93	401.65
GMPR2	40.64	62.49	82.93	46.53	51.57	66.22	58.07	50	15.45	55.3	38.01	22.43	7.82	10.26	59.02	36.87	20.95	7.27	0	57.24	29.94	29.96	60.98	0	4.85	44.19	7.92	9.55	0	10.05	0	34.71	32.07	62.57	39.07	34.5	27.52	63.58	46	27.71	62.18	59.55
RNASEH2C	119.62	385.03	320.5	92.34	340.57	268.25	346.27	87.74	100.44	0	77.52	112.14	168.05	12.31	59.02	207.03	155.04	141.67	0	100.55	305.67	121.71	95.83	0	174.7	76.75	136.66	108.18	30.92	77.51	0	96.43	219.62	325.12	170.61	129	204.21	174.58	143.11	207.83	208.97	253.95
POLDIP3	19.17	38.3	33.69	16	25.18	33.67	12.9	15.09	7.73	0	11.18	29.9	15.63	18.47	21.75	31.2	29.33	7.27	0	10.83	23.63	11.23	4.36	0	14.56	24.42	13.86	6.36	30.92	31.58	0	7.71	30.25	38.03	19.54	31.5	21.72	33.41	7.67	24.94	31.6	21.6
KDM5B	120.38	99.79	92.43	127.97	44.37	93.16	94.63	70.75	100.44	0	87.21	29.9	58.62	102.62	77.66	76.57	99.52	76.28	0	77.35	47.27	48.68	65.34	0	9.71	118.61	57.43	70	0	41.62	0	46.29	210.54	130.66	82.05	90	81.11	65.74	83.48	102.53	184.51	75.89
SNHG16	62.87	69.55	195.67	40.72	92.34	67.34	58.07	66.04	46.36	0	35.78	104.66	35.17	63.62	77.66	99.26	66	116.24	81.87	29.39	81.93	78.64	30.49	81.87	43.67	18.6	63.38	28.64	10.31	64.59	100.67	57.86	38.12	122.69	98.98	126	65.17	86.21	107.33	74.82	72.38	86.98
ZFAND5	63.64	102.81	58.31	66.89	38.37	28.06	53.77	42.45	54.08	0	29.07	52.33	7.82	84.15	96.3	17.02	57.62	25.43	0	35.58	20.48	31.83	39.2	163.75	4.85	19.77	35.65	12.73	30.92	21.53	0	34.71	64.13	69.32	76.84	18	37.66	93.76	60.48	72.05	69.32	57.79
SDHC	20.7	15.12	20.73	15.27	11.99	20.2	2.15	14.15	0	0	10.44	0	39.08	22.58	49.7	22.69	17.81	39.96	0	18.56	20.48	18.72	39.2	0	4.85	4.65	21.79	28.64	41.22	27.27	0	0	10.89	22.7	27.35	31.5	17.38	17.24	23.85	36.02	21.41	23.94
RASA1	824.27	873.88	427.19	933.6	588.81	439.97	1096.89	630.18	394.03	165.91	408.47	515.83	199.31	53.36	273.38	660.78	608.65	697.44	81.87	539.89	601.89	258.4	335.42	1146.23	388.22	360.47	245.58	490	10.31	239.7	251.69	474.44	905.1	1050.18	294.34	653.99	729.96	587.32	1144.01	429.52	774.72	722.14
RMDN3	50.61	61.48	108.85	34.9	125.92	67.34	32.26	66.98	15.45	0	56.65	74.76	62.53	26.68	83.88	51.05	83.81	90.81	0	37.13	88.23	35.58	26.14	0	38.82	38.37	55.45	44.55	10.31	37.32	50.34	27	45.98	101.22	58.61	58.5	39.1	72.2	103.07	77.59	67.28	67.72
DDX1	133.42	443.49	307.11	223.22	327.38	299.68	402.19	184.9	46.36	55.3	76.03	22.43	58.62	145.72	189.5	90.75	179.14	141.67	0	238.23	92.96	76.77	178.6	0	111.61	162.79	75.26	76.36	113.37	193.77	0	88.72	214.78	236.78	131.54	231	308.49	321.14	144.81	119.16	218.14	249.28
EEF1D	201.66	248.96	453.97	253.03	250.63	237.95	238.74	334.9	355.4	165.91	287.72	59.81	195.4	135.46	142.9	215.53	132	134.4	0	198.01	122.9	254.66	104.55	245.62	63.09	100	148.54	140	92.75	88.99	0	185.15	308.56	371.74	342.53	88.5	337.46	259.71	206.14	238.32	278.29	291.89
SLC25A3	35.27	101.8	111.01	72.71	131.91	59.49	66.67	43.4	61.81	55.3	57.39	59.81	62.53	131.35	71.45	87.91	68.09	87.18	0	58.78	94.54	93.62	52.27	0	92.2	117.44	59.42	31.82	92.75	60.28	100.67	61.72	55.06	121.46	35.16	136.5	37.66	106.69	114.15	130.24	108.05	134.85
COL4A3BP	58.27	51.4	19.01	68.35	23.98	5.61	73.13	28.3	0	0	46.21	22.43	35.17	32.84	24.85	39.7	55.52	14.53	0	20.11	23.63	22.47	4.36	0	38.82	23.26	21.79	38.18	0	38.75	0	0	25.41	27.6	16.93	9	14.48	16.16	13.63	2.77	15.29	12.26
SUPT20H	17.64	2.02	17.28	4.36	6	0	10.75	5.66	0	55.3	5.96	0	7.82	30.79	55.92	8.51	19.9	18.16	0	6.19	6.3	3.74	17.42	0	4.85	43.02	3.96	19.09	10.31	14.35	0	3.86	21.78	6.75	13.02	6	2.9	6.47	13.63	2.77	2.04	8.76
NPRL2	32.2	62.49	52.7	19.63	0	16.84	32.26	21.7	15.45	0	25.34	52.33	3.91	12.31	15.53	14.18	18.86	21.8	0	32.49	20.48	14.98	30.49	81.87	0	18.6	37.63	15.91	10.31	24.4	151.01	15.43	20.57	7.36	28.65	6	5.79	20.48	28.96	2.77	17.33	14.59
NGLY1	193.99	8.06	52.26	53.81	46.77	50.51	15.06	85.85	0	110.61	64.1	149.52	23.45	34.89	31.07	14.18	93.24	170.73	81.87	51.05	25.21	110.48	30.49	0	87.35	196.51	41.59	152.73	10.31	130.61	0	23.14	231.72	14.11	96.38	34.5	72.42	25.86	29.81	30.48	20.39	25.69
SPON2	350.41	458.61	222.02	202.86	293.8	222.23	129.05	802.82	154.52	165.91	160.26	515.83	74.25	420.73	65.24	289.27	209.52	570.3	0	1003.98	170.17	241.55	335.42	81.87	155.29	246.51	35.65	111.36	237.04	44.49	0	38.57	125.84	109.19	82.05	21	250.56	324.37	48.55	44.34	57.08	252.78
FER1L4	72.08	31.25	24.62	49.44	9.59	131.32	23.66	22.64	92.71	0	111.06	284.08	35.17	14.37	24.85	19.85	97.43	105.34	0	24.75	55.15	26.21	60.98	81.87	29.12	124.42	146.56	50.91	0	15.79	251.69	0	117.37	77.9	31.26	15	27.52	35.56	18.74	58.19	23.45	22.18
DMXL1	17.64	13.1	20.73	17.45	4.8	4.49	6.45	2.83	30.9	55.3	81.25	0	54.71	49.26	62.13	28.36	22	39.96	0	12.38	9.45	3.74	4.36	0	24.26	138.37	15.84	31.82	30.92	22.97	0	3.86	64.13	22.08	23.44	13.5	23.17	4.31	22.15	13.86	0	3.5
PCMTD1	72.08	21.17	28.08	40.72	20.39	44.9	58.07	32.08	7.73	165.91	40.25	14.95	23.45	57.47	62.13	22.69	54.47	32.69	245.62	27.85	31.51	46.81	100.19	0	9.71	94.19	23.77	31.82	0	27.27	100.67	19.29	62.32	14.11	54.7	19.5	21.72	6.47	33.22	58.19	8.15	16.93
PYGL	1.53	1.01	2.16	2.91	4.8	4.49	0	0.94	23.18	0	35.03	14.95	7.82	43.1	62.13	14.18	19.9	29.06	0	0	11.03	16.85	26.14	0	19.41	10.47	19.81	19.09	20.61	12.92	0	11.57	10.29	4.29	2.6	6	14.48	7.54	7.67	13.86	2.04	4.67
GNAI1	9.97	32.25	23.32	5.82	34.78	39.28	86.03	2.83	0	110.61	64.85	7.48	109.43	151.87	74.56	42.54	83.81	94.45	0	32.49	52	22.47	108.9	81.87	77.64	38.37	41.59	73.18	92.75	77.51	50.34	69.43	12.1	13.5	6.51	75	36.21	7.54	51.11	36.02	17.33	12.26
CALD1	128.05	59.47	165.86	146.87	55.16	331.1	98.94	78.3	169.97	0	27.58	89.71	42.99	775.79	304.44	116.27	49.24	87.18	0	51.05	85.08	121.71	392.04	81.87	179.55	419.77	67.34	63.64	494.69	88.99	805.4	42.43	436.82	97.53	88.56	129	199.87	36.64	112.44	16.63	144.75	30.94
ZMYM5	44.47	9.07	16.41	20.36	6	13.47	6.45	6.6	7.73	0	25.34	0	19.54	34.89	3.11	5.67	42.95	18.16	0	10.83	17.33	11.23	26.14	0	4.85	100	23.77	25.45	10.31	28.71	0	3.86	76.23	6.75	23.44	10.5	2.9	11.85	10.22	13.86	0	7.59
GLI3	32.97	14.11	13.39	10.18	0	5.61	15.06	17.92	0	0	9.69	0	15.63	4.1	15.53	0	13.62	29.06	0	21.66	0	28.09	8.71	0	14.56	5.81	9.9	6.36	0	12.92	0	3.86	24.2	7.36	9.12	0	1.45	6.47	5.11	0	7.14	9.92
PRKAB2	211.63	17.13	66.52	125.79	11.99	37.04	47.32	138.68	23.18	221.21	124.48	156.99	54.71	51.31	71.45	31.2	108.95	185.26	0	72.71	34.66	71.15	139.39	0	116.47	406.98	53.47	95.46	10.31	66.02	100.67	38.57	58.69	20.86	123.73	48	88.35	19.4	42.59	30.48	5.1	32.11
HSD17B11	10.73	19.15	13.82	13.81	8.39	8.98	17.21	19.81	0	0	43.23	22.43	23.45	30.79	55.92	8.51	35.62	10.9	0	26.3	34.66	18.72	91.48	0	53.38	17.44	63.38	15.91	20.61	61.72	0	7.71	13.92	10.43	15.63	27	7.24	6.47	15.33	5.54	5.1	14.01
C9orf142	36.8	37.29	68.68	49.44	28.78	10.1	19.36	47.17	46.36	0	21.62	22.43	19.54	8.21	0	34.03	13.62	76.28	0	47.96	31.51	24.34	0	0	48.53	72.09	13.86	60.46	10.31	37.32	0	15.43	50.22	19.02	3.91	13.5	17.38	23.71	5.96	5.54	23.45	17.51
INSIG2	39.87	8.06	16.85	5.09	3.6	24.69	2.15	2.83	0	0	76.77	74.76	62.53	18.47	6.21	2.84	22	29.06	0	6.19	14.18	44.94	8.71	0	38.82	69.77	67.34	12.73	20.61	68.9	0	27	93.78	8.59	29.95	30	14.48	10.78	13.63	2.77	1.02	7.01
ZNF765	42.17	4.03	12.53	18.18	3.6	28.06	15.06	19.81	0	55.3	23.85	22.43	3.91	24.63	3.11	11.34	27.24	79.92	0	24.75	12.6	39.32	17.42	163.75	0	58.14	11.88	25.45	0	15.79	0	3.86	52.64	10.43	16.93	9	24.62	14.01	17.04	2.77	5.1	11.09
GALK2	10.73	4.03	6.91	8	10.79	2.24	8.6	2.83	0	0	20.87	0	11.72	34.89	31.07	0	13.62	50.86	0	1.55	9.45	18.72	17.42	0	9.71	20.93	33.67	9.55	20.61	25.84	0	3.86	7.26	1.84	16.93	7.5	2.9	0	5.11	13.86	0	5.25
LOC730098	8.43	6.05	15.12	9.45	11.99	0	12.9	8.49	0	55.3	4.47	0	0	38.99	12.43	5.67	0	0	0	1.55	4.73	9.36	21.78	0	29.12	11.63	0	12.73	30.92	0	0	19.29	9.08	1.23	2.6	10.5	2.9	5.39	7.67	0	7.14	8.17
TMEM45A	386.45	83.66	219.86	61.08	20.39	237.95	202.17	59.43	38.63	0	468.1	306.51	70.35	92.36	111.84	493.46	531.13	1623.73	327.49	94.36	797.26	415.69	56.63	0	684.24	862.8	647.63	442.28	154.59	275.58	151.01	46.29	231.12	127.59	244.85	319.5	185.39	94.83	85.18	246.63	14.27	35.03
PAIP1	4.6	4.03	3.89	6.54	1.2	1.12	6.45	7.55	0	55.3	14.16	22.43	11.72	26.68	21.75	8.51	16.76	47.22	0	6.19	31.51	28.09	78.41	0	14.56	19.77	19.81	3.18	20.61	14.35	0	7.71	10.29	6.75	15.63	9	1.45	4.31	11.93	11.08	1.02	7.01
ACOX1	16.87	7.06	14.25	10.18	6	16.84	2.15	15.09	23.18	0	8.2	7.48	0	10.26	18.64	5.67	13.62	0	0	9.28	11.03	18.72	91.48	81.87	19.41	16.28	5.94	6.36	30.92	4.31	50.34	7.71	42.96	15.95	11.72	7.5	2.9	4.31	2.56	0	17.33	13.43
CKS1B	78.98	12.1	75.16	67.62	17.99	24.69	62.37	58.49	7.73	0	93.92	0	42.99	355.06	251.63	53.88	49.24	43.59	0	119.12	39.39	112.35	583.71	491.24	48.53	41.86	27.73	25.45	267.96	117.7	100.67	46.29	42.35	52.14	114.61	54	42	42.03	57.07	11.08	15.29	56.04
SNX3	38.34	54.43	39.74	32.72	35.98	30.3	36.56	25.47	7.73	110.61	99.88	82.23	23.45	176.5	111.84	121.95	71.24	94.45	0	20.11	137.08	127.33	257.01	654.99	87.35	67.44	91.1	50.91	226.73	68.9	50.34	38.57	21.78	32.51	113.31	28.5	8.69	20.48	79.22	85.9	16.31	22.77
HNRNPH1	39.87	74.59	103.23	79.98	117.52	43.77	131.2	39.62	177.7	663.64	12.67	127.09	3.91	63.62	55.92	62.39	122.57	65.39	0	55.69	34.66	59.92	43.56	409.37	38.82	51.16	29.71	54.09	185.51	18.66	50.34	23.14	84.1	61.96	27.35	19.5	42	25.86	29.81	66.51	70.34	66.55
SH3BGRL3	409.45	472.72	390.04	271.94	189.47	274.98	268.85	341.51	193.15	221.21	235.54	299.03	78.16	1524.9	282.7	388.53	125.71	239.75	491.24	448.62	241.07	352.03	500.95	163.75	232.93	148.84	455.52	184.55	886.31	199.51	453.04	196.72	291.62	98.15	109.4	127.5	246.22	363.17	182.29	44.34	111.11	217.75
MAZ	6.9	5.04	5.62	4.36	10.79	0	6.45	5.66	0	0	3.73	22.43	3.91	32.84	31.07	0	16.76	0	0	6.19	0	16.85	13.07	0	19.41	2.33	9.9	6.36	10.31	2.87	0	0	2.42	8.59	3.91	3	0	0	5.11	2.77	3.06	5.25
RNF168	25.3	23.18	36.71	6.54	8.39	11.22	10.75	22.64	15.45	221.21	55.9	74.76	11.72	49.26	77.66	22.69	14.67	47.22	0	34.03	14.18	22.47	8.71	81.87	4.85	34.88	45.55	15.91	20.61	22.97	0	11.57	30.25	13.5	15.63	6	47.79	11.85	15.33	11.08	3.06	14.59
HMG20B	139.55	36.29	82.07	66.17	61.16	94.28	47.32	87.74	30.9	110.61	251.94	493.41	179.77	53.36	74.56	147.47	269.23	479.49	0	216.57	129.2	147.93	135.04	81.87	266.9	603.5	180.23	273.64	51.53	130.61	50.34	27	232.93	98.76	41.68	54	52.14	66.81	75.81	166.27	39.76	75.31
PLEKHA1	111.18	140.1	206.47	63.26	92.34	273.86	148.4	73.58	30.9	110.61	237.03	313.99	128.97	281.17	183.29	124.78	239.9	312.4	0	103.65	195.38	211.59	117.61	163.75	135.88	300	192.11	276.82	113.37	173.67	50.34	150.43	83.49	124.53	105.49	48	56.48	65.74	76.67	85.9	24.46	92.82
BNIP3L	650.99	111.88	274.71	294.48	121.12	347.94	232.28	366.98	30.9	55.3	529.97	642.92	340	178.56	195.71	178.67	327.9	606.63	818.73	341.88	223.74	194.74	152.46	163.75	621.15	1480.25	812.01	257.73	154.59	763.59	352.36	150.43	596.54	101.22	221.4	415.49	280.98	109.92	116.7	119.16	91.74	136.02
PDCD11	32.97	87.69	23.32	8	43.17	26.94	10.75	6.6	54.08	0	7.45	7.48	0	22.58	9.32	17.02	9.43	25.43	163.75	6.19	11.03	3.74	13.07	81.87	29.12	1.16	13.86	3.18	10.31	5.74	100.67	3.86	4.84	17.79	22.14	15	1.45	9.7	3.41	2.77	14.27	20.43
GPC1	21.47	25.2	10.8	14.54	3.6	25.81	19.36	9.43	15.45	0	54.41	37.38	3.91	24.63	18.64	5.67	20.95	39.96	0	10.83	18.91	5.62	39.2	0	0	13.95	15.84	3.18	0	27.27	100.67	0	10.29	26.38	6.51	1.5	14.48	0	8.52	11.08	1.02	5.84
MORC3	28.37	14.11	7.77	18.9	6	11.22	17.21	8.49	0	165.91	61.87	0	23.45	30.79	77.66	56.72	41.9	43.59	81.87	7.73	25.21	16.85	43.56	0	19.41	108.14	21.79	54.09	30.92	41.62	0	65.57	33.28	12.88	22.14	43.5	10.14	11.85	23	2.77	6.12	13.43
TBC1D9B	9.97	10.08	5.18	8	2.4	21.33	0	0	0	0	13.42	0	0	6.16	18.64	19.85	9.43	43.59	0	1.55	11.03	20.6	13.07	0	4.85	5.81	11.88	6.36	41.22	0	0	0	5.45	9.81	0	0	7.24	2.16	5.11	5.54	5.1	1.17
ZNF654	19.17	4.03	8.64	5.82	3.6	10.1	0	11.32	7.73	0	24.6	0	0	10.26	9.32	8.51	8.38	14.53	0	15.47	14.18	14.98	8.71	0	14.56	26.74	15.84	0	0	20.09	0	0	32.07	1.84	5.21	1.5	7.24	5.39	4.26	2.77	3.06	7.01
CD9	10.73	64.51	127.42	5.82	10.79	153.77	258.09	8.49	15.45	165.91	430.83	657.88	222.76	433.05	139.79	377.18	450.46	708.34	0	9.28	565.65	440.04	496.59	0	601.74	376.75	610	499.55	577.14	208.12	151.01	304.72	184.53	34.35	44.28	79.5	299.8	6.47	192.51	465.55	10.19	13.43
DENND5A	15.34	15.12	7.77	4.36	14.39	4.49	4.3	0.94	0	0	14.91	14.95	15.63	10.26	24.85	11.34	9.43	36.33	0	0	7.88	7.49	39.2	0	29.12	6.98	9.9	9.55	0	8.61	0	19.29	20.57	11.66	2.6	3	4.34	4.31	5.11	2.77	4.08	7.01
FAM110A	19.94	4.03	22.46	13.81	2.4	1.12	34.41	8.49	7.73	0	6.71	0	7.82	53.36	27.96	19.85	2.1	10.9	81.87	23.2	11.03	7.49	21.78	0	0	3.49	3.96	3.18	72.14	0	0	0	17.55	7.36	9.12	0	4.34	11.85	5.96	0	7.14	14.59
RAPGEF2	6.9	6.05	6.05	1.45	11.99	6.73	2.15	0.94	0	0	15.65	0	0	26.68	12.43	22.69	8.38	32.69	0	0	6.3	3.74	21.78	81.87	9.71	13.95	23.77	12.73	20.61	4.31	0	11.57	0.61	10.43	6.51	0	0	6.47	5.11	0	8.15	8.76
CPSF3L	9.97	14.11	9.07	8.73	19.19	14.59	0	14.15	0	0	5.96	14.95	7.82	18.47	18.64	11.34	10.48	36.33	81.87	10.83	9.45	0	17.42	0	4.85	6.98	3.96	9.55	0	0	0	0	3.63	1.84	5.21	7.5	1.45	8.62	2.56	8.31	6.12	2.34
PDXDC2P	22.24	18.14	26.78	4.36	13.19	12.35	15.06	4.72	30.9	0	7.45	0	3.91	14.37	18.64	22.69	7.33	10.9	0	3.09	7.88	0	4.36	0	14.56	2.33	0	0	0	4.31	0	7.71	4.24	9.81	0	4.5	0	0	6.81	2.77	10.19	0
HTRA4	546.7	594.68	352.03	434.08	888.61	186.32	36.56	512.26	247.23	940.16	1935.77	37.38	2536.34	4231.97	1105.93	2243.25	80.66	1187.83	982.48	317.13	501.05	387.61	1319.88	2374.32	189.26	45.35	491.17	852.73	3174.24	1100.89	402.7	123.43	690.93	107.35	376.39	19.5	606.85	584.09	977.05	230	134.56	714.56
STARD3NL	5.37	9.07	11.23	11.63	6	15.71	0	2.83	23.18	55.3	27.58	7.48	19.54	108.78	83.88	11.34	30.38	10.9	81.87	6.19	17.33	35.58	87.12	0	14.56	24.42	35.65	22.27	103.06	30.14	0	30.86	10.89	13.5	7.81	15	1.45	4.31	30.67	27.71	7.14	5.84
YBX1	29.9	34.27	17.71	18.18	27.58	8.98	51.62	16.04	15.45	0	29.07	14.95	27.36	258.6	195.71	36.87	64.95	21.8	81.87	20.11	42.54	84.26	196.02	0	48.53	32.56	51.49	28.64	175.2	18.66	352.36	23.14	23.6	19.02	19.54	33	52.14	16.16	49.41	36.02	4.08	17.51
FPGS	8.43	4.03	12.09	5.09	1.2	4.49	2.15	22.64	7.73	0	28.32	0	7.82	8.21	3.11	5.67	19.9	58.12	0	15.47	31.51	1.87	0	0	38.82	58.14	9.9	44.55	0	10.05	0	0	23.6	0.61	9.12	13.5	7.24	2.16	8.52	0	3.06	7.59
PXN	41.41	18.14	9.07	34.17	2.4	17.96	15.06	13.21	15.45	55.3	72.3	22.43	11.72	127.25	167.75	0	1.05	61.75	0	21.66	4.73	48.68	117.61	81.87	29.12	44.19	13.86	12.73	41.22	12.92	201.35	3.86	29.65	4.91	63.82	1.5	43.45	22.63	2.56	8.31	6.12	7.01
TUBE1	2.3	13.1	7.34	2.91	3.6	2.24	0	5.66	7.73	0	18.63	14.95	31.26	14.37	31.07	0	17.81	10.9	0	13.92	15.76	13.11	17.42	81.87	4.85	13.95	9.9	9.55	20.61	10.05	0	7.71	3.63	7.36	13.02	3	1.45	1.08	11.93	5.54	0	4.67
TPP2	3.83	34.27	19.01	1.45	21.59	19.08	34.41	3.77	15.45	55.3	65.59	37.38	58.62	38.99	27.96	39.7	63.9	47.22	81.87	7.73	3.15	24.34	34.85	245.62	48.53	111.63	33.67	15.91	10.31	43.06	50.34	15.43	23.6	17.79	10.42	33	14.48	5.39	31.52	27.71	10.19	6.42
ITSN2	19.17	49.39	31.96	24.72	1.2	14.59	34.41	14.15	7.73	0	0.75	0	15.63	24.63	52.81	0	25.14	21.8	0	10.83	7.88	14.98	43.56	0	0	4.65	0	19.09	113.37	4.31	100.67	34.71	45.38	18.4	7.81	0	7.24	20.48	2.56	2.77	1.02	25.69
BIN2	56.74	8.06	44.06	42.17	49.17	65.1	43.02	74.53	54.08	110.61	141.62	59.81	11.72	170.35	146.01	130.45	31.43	116.24	0	32.49	23.63	116.09	126.33	0	58.23	223.26	61.4	60.46	257.65	88.99	100.67	11.57	55.66	32.51	18.23	6	146.28	38.8	21.3	13.86	9.17	13.43
AIF1L	28.37	64.51	66.95	13.09	26.38	55	135.5	9.43	54.08	55.3	99.14	74.76	62.53	236.02	245.42	102.09	100.57	177.99	0	40.22	179.62	86.13	113.26	81.87	179.55	160.47	75.26	114.55	391.63	74.64	50.34	57.86	72.6	40.49	6.51	58.5	98.49	38.8	69	22.17	31.6	15.76
DUSP28	15.34	14.11	14.25	9.45	2.4	15.71	0	13.21	0	0	17.14	37.38	0	2.05	0	5.67	5.24	18.16	0	10.83	12.6	16.85	0	0	14.56	22.09	5.94	9.55	0	10.05	0	3.86	16.94	2.45	3.91	0	4.34	2.16	8.52	2.77	6.12	3.5
CAMTA1	38.34	10.08	57.02	22.54	21.59	11.22	4.3	16.04	7.73	0	51.43	44.86	62.53	377.63	149.11	65.23	24.09	3.63	0	29.39	48.84	0	78.41	163.75	24.26	101.16	77.24	12.73	154.59	83.25	0	19.29	24.2	23.31	22.14	25.5	27.52	9.7	14.48	58.19	4.08	20.43
CINP	9.97	15.12	7.77	6.54	6	7.86	8.6	25.47	7.73	0	46.21	37.38	58.62	36.94	34.17	36.87	16.76	39.96	0	6.19	44.12	22.47	43.56	0	24.26	73.26	17.82	15.91	82.45	31.58	50.34	50.14	18.15	7.97	9.12	16.5	13.03	11.85	17.04	11.08	7.14	7.59
FBXL12	3.07	0	2.59	2.18	1.2	4.49	0	5.66	0	0	4.47	7.48	3.91	18.47	15.53	14.18	7.33	7.27	0	10.83	3.15	1.87	8.71	0	0	8.14	11.88	12.73	0	10.05	0	11.57	5.45	1.84	5.21	3	0	3.23	3.41	0	1.02	2.92
RNF24	41.41	2.02	21.16	29.81	2.4	0	0	19.81	7.73	55.3	29.07	7.48	27.36	43.1	37.28	5.67	0	29.06	0	24.75	9.45	22.47	8.71	0	4.85	22.09	11.88	0	20.61	10.05	0	0	36.91	1.84	27.35	0	21.72	1.08	3.41	0	1.02	3.5
EGLN3	1240.63	106.84	695.85	464.62	76.75	920.36	451.66	1389.61	185.43	1327.29	1761.35	1502.65	1246.67	903.04	938.18	2521.17	788.84	2026.94	900.61	790.5	1613.43	1155.33	361.55	1473.72	1960.51	1163.97	1031.85	1905.93	886.31	961.66	100.67	324.01	509.42	103.06	817.9	376.49	1116.66	259.71	258.11	687.24	23.45	158.21
CLEC11A	38.34	8.06	22.03	2.91	4.8	33.67	17.21	7.55	7.73	0	19.38	29.9	3.91	32.84	52.81	0	22	18.16	81.87	6.19	12.6	9.36	0	0	14.56	44.19	67.34	9.55	61.84	17.22	0	27	10.89	6.13	15.63	12	13.03	17.24	5.11	2.77	0	5.25
SLC25A30	13.04	8.06	6.48	5.82	1.2	7.86	4.3	2.83	15.45	55.3	67.83	22.43	11.72	0	0	2.84	17.81	25.43	0	4.64	6.3	41.19	0	0	14.56	50	43.57	25.45	0	70.33	0	7.71	10.29	11.04	2.6	3	4.34	4.31	11.93	22.17	0	1.75
DNAAF2	19.94	8.06	17.28	8	1.2	17.96	0	5.66	0	0	17.14	29.9	0	8.21	6.21	14.18	14.67	36.33	0	1.55	4.73	20.6	0	0	9.71	2.33	25.75	15.91	10.31	21.53	0	7.71	7.87	1.84	11.72	1.5	0	4.31	4.26	5.54	0	8.17
MYO9B	23	6.05	5.18	3.64	2.4	11.22	10.75	4.72	23.18	0	10.44	0	0	24.63	59.02	2.84	5.24	0	0	29.39	0	5.62	4.36	0	9.71	5.81	11.88	19.09	20.61	8.61	0	19.29	6.05	4.91	0	0	1.45	15.09	4.26	5.54	0	5.84
LOC100129034	0	0	0.86	0.73	0	0	0	1.89	7.73	0	11.93	0	7.82	10.26	12.43	2.84	0	0	0	0	0	11.23	8.71	0	14.56	20.93	3.96	0	0	1.44	0	0	3.63	4.29	2.6	1.5	1.45	0	1.7	0	0	1.75
PPDPF	3.83	11.09	5.18	0	1.2	1.12	12.9	0	0	0	0.75	0	0	20.52	9.32	5.67	1.05	0	0	7.73	1.58	0	13.07	0	0	23.26	5.94	0	0	0	0	0	2.42	3.07	1.3	1.5	1.45	1.08	1.7	0	2.04	1.75
GRB2	249.97	84.67	168.02	117.79	94.74	158.26	96.78	161.32	54.08	0	336.91	194.37	42.99	779.9	602.67	82.24	110	421.37	163.75	117.57	91.39	213.46	418.18	0	213.52	798.85	205.97	178.18	855.4	150.71	352.36	73.29	292.22	66.86	205.78	55.5	228.84	65.74	92	38.8	29.56	80.56
FAM43A	23.77	9.07	45.79	21.09	2.4	97.65	60.22	16.98	38.63	276.52	104.35	89.71	54.71	16.42	83.88	68.06	68.09	83.55	0	38.67	34.66	95.5	0	818.73	111.61	29.07	77.24	133.64	10.31	123.44	201.35	69.43	47.19	55.82	22.14	46.5	65.17	35.56	19.59	44.34	20.39	13.43
CFAP36	59.81	11.09	4.32	23.99	2.4	15.71	0	36.79	0	110.61	28.32	0	19.54	30.79	18.64	19.85	15.71	36.33	0	38.67	9.45	7.49	13.07	0	24.26	54.65	9.9	0	30.92	30.14	0	0	11.5	5.52	3.91	12	14.48	0	13.63	8.31	8.15	6.42
HMOX1	71.31	2.02	31.96	47.99	1.2	21.33	15.06	33.96	0	0	157.28	29.9	23.45	30.79	338.61	22.69	41.9	65.39	163.75	57.24	9.45	46.81	60.98	0	48.53	143.03	7.92	41.36	41.22	35.88	151.01	0	209.94	14.72	24.75	27	17.38	14.01	14.48	22.17	59.12	19.26
PCSK1N	52.91	30.24	36.28	40.72	11.99	22.45	2.15	9.43	15.45	0	196.04	29.9	58.62	63.62	307.55	36.87	24.09	156.2	0	20.11	26.79	243.42	87.12	81.87	53.38	82.56	53.47	66.82	92.75	103.34	0	3.86	85.31	63.18	41.68	1.5	23.17	6.47	46.85	27.71	8.15	7.01
TIMP3	21.47	82.65	337.77	101.07	324.98	700.37	83.88	77.36	115.89	553.04	266.1	201.85	74.25	2990.29	1258.15	3428.68	57.62	225.22	81.87	38.67	625.52	136.69	1280.68	573.11	985.11	91.86	714.97	19.09	484.38	122	1963.15	34.71	150.65	121.46	368.57	81	224.49	73.28	129.48	421.21	173.29	362.53
PPIA	141.85	191.51	127.42	222.49	71.95	70.71	182.82	137.73	7.73	110.61	131.19	269.13	27.36	2076.99	1161.85	17.02	302.75	94.45	163.75	85.08	141.81	190.99	1285.03	0	232.93	209.31	406.01	175	1360.39	104.78	402.7	54	117.98	27.6	454.53	234	183.94	33.41	51.96	24.94	17.33	70.05
TARBP2	10.73	14.11	15.98	2.18	1.2	3.37	8.6	3.77	0	0	7.45	7.48	19.54	16.42	18.64	8.51	11.52	3.63	0	4.64	11.03	9.36	34.85	81.87	38.82	8.14	15.84	15.91	0	0	0	11.57	5.45	4.29	2.6	10.5	7.24	4.31	1.7	5.54	2.04	2.34
BLNK	43.71	1.01	15.12	7.27	1.2	4.49	8.6	13.21	7.73	0	12.67	44.86	31.26	0	6.21	0	50.28	7.27	0	3.09	12.6	20.6	0	0	19.41	63.95	17.82	9.55	0	44.49	0	19.29	25.41	1.23	10.42	21	0	1.08	2.56	5.54	4.08	4.67
MOB1B	9.2	0	0	2.91	0	0	0	0	0	0	0	0	0	2.05	3.11	2.84	6.29	0	0	3.09	0	0	4.36	0	0	4.65	1.98	6.36	10.31	2.87	0	0	0.61	1.23	1.3	1.5	0	0	0	0	1.02	1.17
ZNF254	2.3	3.02	2.59	0	0	7.86	0	1.89	0	55.3	5.96	0	3.91	6.16	31.07	14.18	3.14	0	0	0	4.73	5.62	26.14	0	0	12.79	21.79	0	0	7.18	0	7.71	9.08	4.29	3.91	1.5	0	0	7.67	0	4.08	2.34
ACTB	92.78	353.79	315.75	268.3	188.27	74.08	126.9	206.6	270.41	276.52	55.9	657.88	117.24	4486.46	1655.79	445.25	127.81	210.69	491.24	241.33	225.31	264.02	670.83	818.73	271.75	109.3	89.12	127.27	1803.55	129.18	604.05	266.15	217.2	208.56	237.03	60	254.91	171.35	102.22	83.13	354.74	175.14
BMS1P4	4.6	9.07	6.91	4.36	2.4	1.12	0	2.83	15.45	0	9.69	0	0	4.1	15.53	19.85	3.14	3.63	0	7.73	3.15	0	4.36	0	0	4.65	0	0	0	0	0	0	5.45	4.91	0	4.5	0	0	0	0	0	3.5
WASH1	0	1.01	3.02	2.91	0	3.37	0	3.77	7.73	0	1.49	7.48	0	0	12.43	0	7.33	0	0	7.73	3.15	0	0	0	0	2.33	7.92	3.18	0	0	0	0	0.61	2.45	1.3	1.5	0	0	1.7	0	0	0.58
FERMT2	36.04	33.26	96.32	50.9	26.38	49.38	17.21	43.4	0	110.61	70.81	74.76	70.35	365.32	183.29	39.7	40.86	87.18	0	40.22	39.39	20.6	104.55	81.87	63.09	91.86	29.71	22.27	288.57	50.24	0	19.29	111.93	38.65	2.6	18	34.76	25.86	35.78	11.08	11.21	56.04
BID	0	0	0.43	0	1.2	0	0	0	0	0	11.18	0	0	0	3.11	0	0	14.53	0	0	6.3	3.74	4.36	0	14.56	12.79	0	12.73	0	10.05	0	0	10.89	1.23	2.6	0	4.34	0	1.7	0	0	0.58
LY6K	3.07	2.02	5.18	2.18	1.2	1.12	2.15	5.66	0	0	15.65	0	3.91	10.26	9.32	2.84	9.43	0	0	0	1.58	5.62	17.42	0	4.85	0	17.82	0	10.31	7.18	0	0	0	1.23	5.21	1.5	2.9	0	1.7	0	1.02	0
ZNF430	33.74	14.11	6.48	16.72	2.4	1.12	12.9	29.25	0	0	5.96	0	0	10.26	21.75	0	6.29	0	0	9.28	0	3.74	17.42	0	0	13.95	19.81	9.55	20.61	8.61	100.67	0	10.29	9.2	14.33	0	0	3.23	3.41	0	4.08	2.34
CDC42EP1	8.43	5.04	15.12	16.72	6	12.35	38.71	8.49	0	221.21	48.45	29.9	15.63	36.94	105.62	28.36	15.71	145.3	0	7.73	15.76	74.9	17.42	0	29.12	54.65	31.69	28.64	10.31	7.18	100.67	46.29	11.5	14.72	6.51	4.5	15.93	8.62	5.11	55.42	0	5.25
PDE10A	0	0	0.86	0.73	0	1.12	0	0.94	0	0	11.18	0	3.91	12.31	24.85	5.67	0	10.9	0	0	0	3.74	8.71	0	4.85	19.77	0	3.18	30.92	14.35	0	0	1.82	2.45	0	0	4.34	1.08	0.85	5.54	1.02	0
ATG2A	0.77	6.05	8.64	1.45	3.6	4.49	6.45	5.66	7.73	0	2.98	7.48	19.54	0	0	14.18	4.19	0	0	1.55	6.3	7.49	0	0	14.56	0	5.94	6.36	0	0	0	0	1.82	4.29	0	6	0	1.08	0	0	0	1.75
CCDC57	4.6	1.01	22.46	7.27	2.4	0	0	14.15	7.73	0	29.07	0	3.91	20.52	74.56	2.84	3.14	3.63	0	3.09	1.58	1.87	0	0	14.56	41.86	27.73	0	20.61	11.48	0	0	13.31	1.84	6.51	0	10.14	7.54	2.56	0	2.04	1.17
IFNAR2	1.53	0	5.18	1.45	3.6	0	2.15	0.94	7.73	0	35.03	0	3.91	61.57	90.09	8.51	9.43	0	81.87	1.55	4.73	5.62	21.78	0	19.41	19.77	23.77	3.18	72.14	12.92	0	0	4.84	13.5	5.21	1.5	8.69	1.08	2.56	8.31	1.02	5.84
GPR32	4.6	4.03	1.3	8.73	6	3.37	0	0	0	0	4.47	0	0	2.05	0	0	4.19	0	0	0	4.73	1.87	8.71	0	0	1.16	1.98	3.18	0	1.44	0	0	0	0.61	0	0	0	3.23	0.85	0	0	1.17
PTGDS	65.18	41.33	156.79	30.54	21.59	104.38	21.51	34.91	46.36	221.21	600.04	620.5	218.85	6.16	90.09	153.14	222.09	156.2	900.61	72.71	441.17	445.65	26.14	163.75	436.75	1033.73	503.05	369.09	41.22	401.89	0	169.72	124.63	10.43	19.54	321	146.28	47.42	79.22	85.9	12.23	19.26
PLOD2	83.58	0	41.03	20.36	2.4	23.57	40.86	2.83	0	0	62.61	14.95	140.69	77.99	83.88	147.47	147.71	108.98	0	3.09	52	1.87	8.71	327.49	271.75	34.88	101.01	47.73	72.14	27.27	0	0	0.61	27.6	41.68	13.5	59.38	18.32	10.22	5.54	0	5.25
BAX	1.53	9.07	7.34	2.91	3.6	5.61	4.3	5.66	7.73	0	2.24	14.95	15.63	4.1	0	2.84	5.24	18.16	0	12.38	3.15	11.23	8.71	0	4.85	3.49	5.94	0	0	20.09	50.34	0	0.61	3.07	2.6	4.5	0	3.23	0	2.77	3.06	2.34
SLC29A3	4.6	1.01	3.46	9.45	11.99	5.61	6.45	8.49	7.73	0	3.73	0	0	16.42	31.07	14.18	6.29	10.9	0	4.64	12.6	7.49	78.41	0	0	6.98	0	0	20.61	4.31	0	0	7.87	5.52	7.81	0	2.9	0	2.56	0	1.02	6.42
INTS8	1.53	0	2.16	8.73	2.4	2.24	4.3	5.66	0	0	7.45	0	3.91	8.21	6.21	11.34	6.29	7.27	0	0	3.15	5.62	13.07	0	0	12.79	3.96	6.36	0	7.18	0	11.57	3.03	0.61	2.6	6	0	3.23	0.85	0	0	0
H19	0	1.01	0.86	0	1.2	1.12	36.56	0	0	0	21.62	0	7.82	49.26	27.96	39.7	0	14.53	0	13.92	11.03	0	47.92	0	0	18.6	13.86	0	10.31	2.87	0	0	0.61	3.07	13.02	0	1.45	0	0	11.08	0	0
PAK3	1.53	11.09	3.89	10.18	3.6	6.73	0	10.38	23.18	0	0	0	0	0	0	0	0	7.27	0	12.38	0	0	0	0	0	3.49	9.9	9.55	0	0	0	0	1.82	2.45	1.3	1.5	0	3.23	0	0	0	1.75
DLEU2	46.01	7.06	7.77	6.54	0	16.84	10.75	9.43	0	0	12.67	0	3.91	0	0	0	18.86	18.16	81.87	1.55	1.58	0	0	0	19.41	6.98	0	6.36	10.31	5.74	0	7.71	17.55	0.61	13.02	1.5	0	0	3.41	5.54	0	4.09
TNRC6B	31.44	8.06	64.79	13.09	0	7.86	6.45	32.08	0	55.3	14.91	0	7.82	38.99	34.17	0	14.67	25.43	0	15.47	3.15	16.85	65.34	81.87	29.12	52.33	15.84	3.18	20.61	11.48	0	0	32.07	11.04	28.65	0	1.45	9.7	1.7	5.54	1.02	2.92
DOT1L	7.67	3.02	1.3	5.82	4.8	2.24	12.9	10.38	15.45	0	1.49	0	0	6.16	0	0	1.05	0	0	0	3.15	0	0	0	0	9.3	1.98	3.18	0	1.44	0	0	0	3.07	0	0	0	3.23	1.7	0	0	0
PNCK	8.43	1.01	4.75	3.64	0	3.37	2.15	4.72	0	0	11.93	52.33	11.72	0	3.11	2.84	44	7.27	0	7.73	4.73	5.62	4.36	0	14.56	32.56	7.92	31.82	0	1.44	100.67	0	6.66	3.68	14.33	9	1.45	0	2.56	0	1.02	1.17
APBB3	4.6	1.01	7.77	1.45	10.79	13.47	0	0	7.73	0	2.24	0	15.63	4.1	0	0	3.14	0	0	7.73	0	7.49	0	0	0	3.49	0	0	0	7.18	0	0	1.82	0	1.3	0	0	0	0.85	5.54	1.02	0
SLC46A3	8.43	3.02	3.46	1.45	1.2	8.98	0	11.32	0	0	16.4	0	0	0	0	0	8.38	32.69	0	3.09	7.88	9.36	0	0	0	5.81	3.96	0	0	4.31	0	0	9.68	0.61	2.6	4.5	2.9	0	0.85	0	0	0.58
RALBP1	95.08	125.99	436.69	49.44	29.98	67.34	86.03	65.09	46.36	221.21	195.29	74.76	54.71	2068.78	869.83	138.96	27.24	334.19	163.75	72.71	178.05	22.47	1707.57	163.75	218.37	1027.92	376.3	3.18	1494.37	218.17	201.35	61.72	78.05	125.75	33.86	82.5	318.63	82.98	30.67	2.77	103.98	161.71
RAP2A	8.43	2.02	1.3	5.82	0	0	0	0.94	0	0	12.67	7.48	0	10.26	0	14.18	5.24	3.63	0	9.28	6.3	16.85	0	0	0	4.65	15.84	19.09	0	1.44	50.34	0	0.61	3.68	5.21	1.5	2.9	0	0.85	0	2.04	0.58
ARMS2	46.01	5.04	41.03	10.91	25.18	424.26	8.6	61.32	0	0	19.38	89.71	0	0	0	314.79	188.57	228.85	0	1.55	113.44	129.2	0	81.87	0	1.16	13.86	0	0	10.05	0	34.71	1.21	19.02	5.21	0	13.03	6.47	33.22	16.63	36.7	25.69
IQSEC1	37.57	4.03	24.19	12.36	2.4	37.04	8.6	16.98	7.73	0	11.93	37.38	27.36	65.68	83.88	34.03	26.19	105.34	0	17.02	6.3	26.21	65.34	245.62	38.82	38.37	35.65	6.36	51.53	2.87	0	23.14	18.76	29.44	5.21	0	14.48	12.93	3.41	11.08	5.1	12.26
FLJ20021	1.53	0	5.62	4.36	7.2	2.24	2.15	4.72	0	0	1.49	0	0	8.21	0	0	9.43	14.53	0	3.09	0	0	8.71	0	0	6.98	7.92	0	10.31	5.74	0	0	3.63	4.29	0	1.5	0	0	0.85	0	0	2.34
VEGFA	9.2	0	3.89	0.73	1.2	1.12	2.15	2.83	0	0	59.63	14.95	3.91	4.1	62.13	0	4.19	7.27	0	7.73	1.58	18.72	0	0	19.41	19.77	39.61	6.36	0	24.4	100.67	0	24.81	2.45	5.21	0	11.59	3.23	10.22	2.77	1.02	0
HSPA1B	6.13	5.04	3.89	20.36	11.99	0	10.75	14.15	0	0	16.4	104.66	0	92.36	0	45.38	44	21.8	0	1.55	59.87	22.47	74.05	245.62	14.56	27.91	19.81	3.18	195.81	43.06	251.69	19.29	27.83	1.84	78.14	0	1.45	1.08	10.22	13.86	6.12	2.92
SLC35E2	9.97	2.02	11.23	0	3.6	0	6.45	1.89	0	0	2.98	0	3.91	0	6.21	5.67	3.14	0	0	4.64	4.73	1.87	0	0	0	9.3	3.96	0	10.31	8.61	50.34	0	6.05	3.07	1.3	3	0	4.31	0	0	0	1.17
SLC39A4	1.53	0	1.73	0	6	6.73	2.15	0	15.45	55.3	4.47	7.48	0	32.84	37.28	0	7.33	3.63	81.87	0	0	9.36	26.14	0	0	3.49	7.92	0	10.31	0	0	0	1.21	2.45	11.72	3	0	1.08	1.7	0	4.08	2.34
PFKFB4	19.17	0	3.89	7.27	1.2	22.45	6.45	13.21	0	0	40.25	67.28	3.91	53.36	55.92	28.36	14.67	72.65	0	3.09	3.15	35.58	30.49	0	4.85	36.05	7.92	15.91	0	33.01	50.34	15.43	12.71	5.52	14.33	10.5	2.9	0	0.85	16.63	3.06	0
UBASH3B	19.94	0	6.48	4.36	0	12.35	2.15	10.38	0	0	15.65	14.95	15.63	137.51	164.65	5.67	12.57	32.69	81.87	3.09	1.58	26.21	30.49	0	33.97	74.42	35.65	3.18	82.45	1.44	0	0	20.57	1.84	35.16	0	10.14	3.23	12.78	2.77	1.02	1.75
ADAMTS20	6.13	0	2.59	0	0	0	4.3	0	0	0	2.98	7.48	0	14.37	34.17	0	0	14.53	0	9.28	1.58	5.62	21.78	0	0	10.47	5.94	0	41.22	1.44	0	0	3.63	0	1.3	9	1.45	0	0	2.77	0	0.58
PADI1	0.77	0	1.3	12.36	4.8	0	0	0.94	7.73	0	27.58	0	3.91	94.41	164.65	11.34	2.1	7.27	0	47.96	0	0	13.07	0	33.97	29.07	5.94	0	51.53	7.18	50.34	7.71	21.18	11.04	16.93	7.5	0	1.08	0	11.08	1.02	0
RBM24	0	1.01	1.73	0	6	13.47	0	0	0	0	0.75	44.86	0	14.37	9.32	14.18	20.95	14.53	0	0	0	0	0	0	0	10.47	0	6.36	30.92	0	0	11.57	0	0	1.3	6	0	0	0	0	0	8.76
IL6ST	18.4	4.03	6.48	21.81	0	31.43	17.21	6.6	15.45	110.61	67.83	52.33	46.9	572.61	139.79	31.2	5.24	43.59	0	18.56	6.3	16.85	74.05	0	24.26	90.7	51.49	12.73	226.73	35.88	151.01	0	27.83	40.49	42.98	4.5	30.41	4.31	15.33	2.77	4.08	9.34
PCP4L1	1.53	0	0.43	3.64	0	0	4.3	0	0	0	0	0	0	16.42	9.32	0	24.09	25.43	0	0	12.6	9.36	8.71	0	0	1.16	0	3.18	0	0	0	0	4.24	0	2.6	0	0	0	0.85	2.77	3.06	0.58
VRK2	1.53	0	5.62	6.54	1.2	1.12	17.21	7.55	0	0	2.98	0	0	20.52	9.32	0	3.14	0	0	0	0	3.74	4.36	0	0	3.49	0	0	0	1.44	0	0	2.42	3.68	0	0	0	0	0.85	2.77	0	0
TENM3	0.77	0	3.89	0	1.2	12.35	4.3	0.94	0	0	26.09	7.48	0	55.41	46.6	19.85	4.19	39.96	0	1.55	1.58	26.21	69.7	0	19.41	38.37	31.69	19.09	123.67	5.74	0	3.86	4.24	10.43	7.81	0	13.03	0	2.56	11.08	0	0
AHCYL2	2.3	3.02	3.02	1.45	0	2.24	4.3	8.49	0	0	5.96	0	0	6.16	0	2.84	3.14	0	0	10.83	0	7.49	17.42	0	0	5.81	0	0	0	10.05	0	0	1.82	5.52	0	0	0	1.08	0.85	0	0	0
OXGR1	1.53	1.01	0.43	0.73	2.4	0	0	3.77	0	0	1.49	0	0	0	0	0	32.48	7.27	0	6.19	9.45	7.49	21.78	0	9.71	1.16	9.9	15.91	0	1.44	50.34	0	4.84	1.23	2.6	0	4.34	3.23	2.56	0	0	0.58
AGXT	24.54	2.02	4.75	8.73	1.2	2.24	0	4.72	0	55.3	7.45	14.95	0	0	21.75	2.84	0	0	0	3.09	28.36	3.74	21.78	0	4.85	83.72	3.96	50.91	0	0	0	0	12.71	4.29	1.3	3	10.14	2.16	4.26	0	1.02	1.75
WDR41	1.53	8.06	3.46	5.82	2.4	0	2.15	0	7.73	0	1.49	0	0	16.42	9.32	0	0	0	0	0	0	0	26.14	0	4.85	0	0	0	10.31	0	0	0	0.61	2.45	0	0	2.9	0	0	0	0	2.34
FARP2	3.07	1.01	0.43	0	2.4	4.49	4.3	5.66	0	0	5.96	14.95	3.91	6.16	0	0	0	0	0	0	4.73	0	0	0	0	9.3	5.94	0	0	2.87	0	0	5.45	0.61	0	3	0	0	2.56	0	0	0
ZFY	0	0	0	0	0	0	0	0	0	0	9.69	7.48	7.82	12.31	6.21	0	0	0	0	0	4.73	0	0	0	4.85	12.79	1.98	3.18	0	8.61	0	11.57	0	0	0	6	0	0	0.85	0	0	0
MTDH	0.77	2.02	2.59	2.18	0	0	4.3	0	15.45	0	5.22	0	3.91	36.94	21.75	8.51	1.05	0	0	0	0	9.36	56.63	0	9.71	26.74	23.77	0	51.53	4.31	100.67	0	3.03	1.84	3.91	4.5	13.03	3.23	0.85	0	1.02	0.58
MVB12A	5.37	15.12	29.37	1.45	7.2	3.37	10.75	6.6	0	0	2.24	7.48	0	24.63	71.45	0	6.29	0	0	1.55	0	3.74	34.85	0	14.56	4.65	5.94	0	30.92	0	0	0	10.29	3.07	0	1.5	0	9.7	2.56	0	1.02	4.09
GREB1	1.53	1.01	2.16	0	2.4	2.24	0	0	7.73	0	0	0	0	0	6.21	0	0	0	0	1.55	4.73	3.74	0	0	4.85	0	3.96	0	0	1.44	0	0	4.24	0.61	0	0	2.9	0	0	0	0	0
TMCO4	0.77	23.18	29.37	7.27	3.6	20.2	15.06	1.89	7.73	0	5.22	44.86	62.53	116.98	27.96	5.67	8.38	14.53	81.87	0	9.45	0	4.36	81.87	33.97	2.33	51.49	9.55	51.53	2.87	100.67	3.86	4.24	11.66	2.6	12	7.24	3.23	1.7	2.77	13.25	6.42
KLF8	3.07	1.01	2.59	0	1.2	1.12	0	0.94	0	0	1.49	0	0	12.31	12.43	8.51	2.1	0	0	1.55	1.58	0	17.42	0	0	2.33	0	0	30.92	0	0	3.86	6.66	3.07	0	0	2.9	0	0.85	0	0	1.17
IFI6	539.04	105.83	310.56	293.75	147.5	812.61	68.82	239.62	115.89	165.91	361.51	67.28	254.02	3856.38	2205.65	56.72	129.9	39.96	81.87	176.35	37.81	215.34	2626.7	1555.59	412.48	22.09	308.96	54.09	1009.99	328.69	151.01	19.29	557.22	143.54	50.79	61.5	154.97	149.79	93.7	299.28	76.45	202.57
LOC105447648	207.03	11.09	17.28	133.79	8.39	17.96	8.6	66.98	30.9	55.3	90.19	7.48	7.82	8.21	3.11	39.7	2.1	90.81	0	13.92	42.54	5.62	4.36	0	19.41	90.7	102.99	28.64	0	30.14	251.69	11.57	70.18	18.4	5.21	4.5	46.35	2.16	5.11	2.77	12.23	8.17
CACNB2	0	8.06	0	3.64	3.6	0	6.45	0	7.73	0	2.24	0	0	0	0	0	2.1	0	0	0	0	0	0	0	0	3.49	3.96	0	0	0	0	0	0	1.84	0	0	0	1.08	0	0	0	0
PEPD	68.24	10.08	33.26	2.91	3.6	30.3	4.3	29.25	15.45	55.3	148.33	231.75	42.99	18.47	46.6	42.54	39.81	337.82	0	1.55	55.15	20.6	26.14	163.75	169.85	151.16	126.75	159.09	0	53.11	302.02	23.14	41.75	4.29	29.95	22.5	17.38	2.16	9.37	69.28	7.14	9.92
COL27A1	3.07	4.03	1.73	0	6	52.75	2.15	1.89	0	221.21	328.72	29.9	148.51	108.78	15.53	48.21	50.28	83.55	81.87	4.64	42.54	33.7	21.78	818.73	77.64	9.3	13.86	38.18	133.98	41.62	0	23.14	59.9	15.95	0	3	37.66	3.23	10.22	102.53	0	2.34
SLC2A3	1740.56	138.09	182.71	916.87	56.36	286.21	243.04	1296.22	177.7	165.91	512.08	1375.56	27.36	149.82	618.2	85.08	575.13	1264.11	409.37	1602.65	245.8	913.78	182.95	81.87	470.72	903.5	257.47	1492.29	185.51	292.81	704.72	77.14	1386.09	147.84	87.26	9	499.67	253.25	113.29	8.31	38.74	161.13
RAP2B	19.17	5.04	5.62	15.27	0	3.37	0	10.38	7.73	110.61	1.49	37.38	0	67.73	9.32	2.84	1.05	7.27	0	6.19	0	9.36	30.49	0	0	2.33	5.94	0	195.81	5.74	100.67	0	6.05	3.07	15.63	1.5	8.69	4.31	1.7	2.77	5.1	2.92
ASCL2	0	0	0.86	0	0	8.98	2.15	0	7.73	0	2.98	0	0	32.84	49.7	5.67	4.19	3.63	0	0	0	9.36	21.78	0	0	13.95	7.92	0	10.31	0	50.34	0	1.21	2.45	0	0	7.24	1.08	0	2.77	0	2.34
GUSBP4	2.3	2.02	3.89	0.73	0	0	6.45	0.94	0	0	1.49	0	7.82	8.21	0	0	3.14	10.9	0	3.09	0	0	17.42	0	0	1.16	0	0	0	1.44	0	0	0	3.68	0	0	0	1.08	0	0	0	0
SEMA4C	4.6	3.02	9.07	4.36	2.4	3.37	0	5.66	7.73	0	18.63	0	3.91	38.99	9.32	2.84	3.14	32.69	0	1.55	4.73	3.74	13.07	0	29.12	5.81	5.94	0	30.92	11.48	0	0	4.84	1.23	3.91	0	1.45	4.31	2.56	0	1.02	2.92
PRDM15	1.53	8.06	0.43	0.73	0	7.86	4.3	4.72	7.73	0	0.75	0	0	0	0	5.67	9.43	0	0	0	0	0	0	0	0	0	0	0	0	0	0	0	0	1.23	0	0	0	2.16	0	0	0	0
ACOT11	1.53	0	2.59	9.45	0	1.12	0	0.94	0	0	20.87	14.95	0	6.16	6.21	8.51	4.19	10.9	0	3.09	4.73	7.49	43.56	81.87	29.12	48.84	27.73	6.36	0	0	151.01	0	10.29	6.13	0	0	4.34	1.08	2.56	16.63	0	2.34
CDKN1C	31.44	28.22	100.21	63.26	41.97	189.68	161.31	51.89	200.88	608.34	1058.45	14.95	7.82	2760.42	2373.4	68.06	17.81	617.53	245.62	27.85	170.17	176.01	2169.31	982.48	509.54	2423.29	1425.97	12.73	5554.93	444.95	1258.43	3.86	325.5	55.82	11.72	33	1319.43	50.65	17.04	8.31	24.46	67.14
LGALS3BP	25.3	29.23	56.15	36.36	28.78	68.47	36.56	16.98	100.44	165.91	61.87	7.48	46.9	1188.32	382.11	5.67	38.76	36.33	0	7.73	29.94	22.47	1067.23	245.62	82.5	8.14	93.08	0	742.03	7.18	100.67	0	37.51	40.49	46.89	15	72.42	25.86	18.74	44.34	17.33	30.36
CMTM4	4.6	0	2.16	5.82	2.4	3.37	2.15	2.83	0	0	0	0	0	34.89	18.64	2.84	4.19	3.63	0	1.55	0	0	34.85	0	0	4.65	0	3.18	30.92	0	50.34	0	13.31	2.45	0	0	2.9	0	2.56	2.77	2.04	1.75
KIAA0586	1.53	8.06	3.89	0.73	3.6	2.24	0	0.94	0	0	3.73	0	3.91	10.26	0	0	4.19	7.27	0	0	1.58	1.87	8.71	0	0	2.33	7.92	15.91	0	0	0	0	3.03	0.61	2.6	1.5	0	0	0	0	1.02	0
KLHDC9	24.54	0	0.86	5.09	0	0	0	4.72	0	0	2.24	0	15.63	2.05	0	0	0	7.27	0	0	0	0	0	0	0	2.33	3.96	0	20.61	8.61	0	0	0.61	1.23	0	0	0	0	1.7	0	2.04	1.17
LAIR2	239.23	1152.07	2391.63	500.97	1493.01	1241.36	1144.21	463.2	1166.64	4037.16	5295.97	231.75	3997.95	31193.8	14184.5	3408.83	375.04	1383.99	2538.07	570.83	3171.72	196.61	19563	11216.6	5750.5	5891.94	9526.28	213.18	46150.2	3878.23	704.72	867.87	2800	753.9	14.33	1904.97	5991.74	559.3	28.96	1133.38	96.84	1123.21
MXRA7	2.3	0	0.86	3.64	0	0	2.15	0.94	7.73	0	38.76	0	7.82	41.05	55.92	0	0	0	0	0	14.18	0	21.78	0	9.71	12.79	5.94	0	51.53	11.48	0	0	1.21	0.61	0	4.5	5.79	0	6.81	0	0	0
TRIO	0	3.02	0.43	1.45	1.2	0	0	0	15.45	0	2.24	0	0	24.63	24.85	22.69	1.05	7.27	0	9.28	14.18	1.87	0	0	0	8.14	3.96	0	0	0	50.34	0	1.21	1.23	9.12	0	0	0	0.85	0	0	0.58
IFNGR2	39.11	3.02	20.73	23.27	16.79	23.57	6.45	25.47	15.45	110.61	185.6	119.61	39.08	231.92	167.75	31.2	27.24	101.71	0	18.56	69.33	86.13	117.61	81.87	121.32	189.54	122.79	70	226.73	76.07	0	15.43	60.5	12.88	9.12	16.5	60.83	8.62	16.18	13.86	4.08	4.09
PTPRE	5.37	14.11	10.8	8.73	3.6	3.37	17.21	0	0	165.91	90.94	22.43	27.36	231.92	118.05	19.85	7.33	65.39	81.87	3.09	6.3	22.47	178.6	0	53.38	41.86	23.77	0	206.12	27.27	0	0	48.4	27.6	0	0	43.45	3.23	11.07	0	2.04	1.75
CAPG	15.34	5.04	35.42	17.45	14.39	7.86	25.81	12.26	61.81	55.3	5.22	74.76	11.72	925.61	602.67	39.7	45.05	18.16	81.87	29.39	40.97	46.81	522.73	0	116.47	19.77	39.61	12.73	515.3	8.61	151.01	11.57	18.76	31.28	33.86	19.5	28.97	10.78	25.56	19.4	19.37	19.85
IL10RB-AS1	4.6	0	0.86	0	0	0	0	0	7.73	0	14.16	7.48	7.82	6.16	9.32	2.84	5.24	0	0	0	9.45	5.62	0	0	0	27.91	11.88	0	0	2.87	50.34	0	2.42	0	0	0	1.45	0	2.56	0	6.12	0
ACTN1	1.53	1.01	4.32	1.45	4.8	1.12	0	1.89	15.45	55.3	0.75	0	11.72	139.56	40.39	19.85	0	3.63	0	1.55	1.58	18.72	52.27	0	0	0	0	0	92.75	0	0	0	3.03	0.61	1.3	1.5	14.48	3.23	0	0	0	5.84
CYP26A1	16.1	4.03	25.05	5.09	41.97	69.59	43.02	16.04	23.18	110.61	111.81	254.18	97.7	0	77.66	85.08	427.42	199.79	0	13.92	146.53	43.07	0	0	727.91	188.37	1513.11	181.37	0	133.48	50.34	7.71	47.8	21.47	13.02	40.5	81.11	17.24	51.11	24.94	2.04	14.01
BMP7	9.97	3.02	1.73	10.18	4.8	2.24	0	0.94	7.73	110.61	87.21	0	19.54	2.05	12.43	31.2	11.52	39.96	163.75	0	26.79	46.81	0	81.87	14.56	38.37	21.79	12.73	0	51.67	0	3.86	12.71	2.45	10.42	3	17.38	2.16	6.81	0	2.04	2.92
PLAUR	3.83	17.13	27.21	2.91	21.59	4.49	2.15	8.49	7.73	0	23.85	149.52	31.26	158.03	298.23	5.67	66	32.69	0	18.56	83.51	61.79	126.33	81.87	155.29	3.49	65.36	47.73	504.99	17.22	0	7.71	16.94	4.91	11.72	15	27.52	6.47	37.48	5.54	2.04	5.25
TYMSOS	9.2	11.09	9.93	0	4.8	7.86	0	0	0	0	0	0	0	0	0	0	9.43	14.53	0	0	0	7.49	4.36	0	0	0	0	0	0	0	0	0	0	0	0	3	0	0	0.85	0	0	0.58
PDE4D	6.13	1.01	0.43	1.45	0	0	0	0	15.45	0	9.69	0	3.91	12.31	65.24	0	6.29	18.16	0	0	0	0	0	0	0	12.79	0	6.36	30.92	5.74	0	0	3.63	3.07	5.21	0	0	1.08	0.85	0	1.02	0
CRYZ	3.07	2.02	1.73	0.73	4.8	2.24	0	0	0	0	8.94	0	3.91	14.37	34.17	11.34	9.43	18.16	0	0	25.21	11.23	21.78	0	0	9.3	27.73	19.09	0	5.74	0	0	1.82	0	9.12	0	0	0	1.7	0	1.02	1.17
TRDN	0	0	0.43	0	0	0	0	0	0	0	15.65	0	0	0	0	0	0	32.69	0	0	6.3	3.74	0	0	0	24.42	17.82	15.91	0	14.35	0	7.71	18.76	1.23	0	0	1.45	0	5.96	0	0	0
LGALS3	6.13	14.11	8.64	23.99	3.6	6.73	21.51	18.87	15.45	110.61	0.75	0	7.82	582.87	232.99	17.02	8.38	29.06	81.87	15.47	9.45	41.19	126.33	0	9.71	0	1.98	6.36	175.2	1.44	0	3.86	10.29	11.04	22.14	3	4.34	5.39	5.11	0	21.41	14.59
RNU6-2	4.6	0	0	5.09	1.2	0	2.15	0	0	0	11.18	67.28	0	0	6.21	0	54.47	7.27	0	0	11.03	0	0	0	0	24.42	1.98	12.73	10.31	21.53	0	15.43	0.61	1.23	0	7.5	0	1.08	4.26	0	0	0
CCNB1	4.6	1.01	3.46	2.91	6	7.86	6.45	6.6	0	0	0	0	7.82	6.16	15.53	0	1.05	0	81.87	1.55	4.73	88.01	26.14	0	4.85	6.98	5.94	0	51.53	2.87	50.34	3.86	1.82	5.52	5.21	6	1.45	1.08	0	0	0	2.34
CORIN	1.53	2.02	1.3	0.73	0	0	15.06	0	0	0	0	14.95	0	0	0	11.34	7.33	0	0	0	4.73	0	4.36	0	0	0	0	0	0	0	0	11.57	0.61	0	0	1.5	0	0	2.56	0	0	0
C8orf31	2.3	2.02	3.02	2.18	2.4	2.24	2.15	0	15.45	0	0	0	0	43.1	24.85	0	1.05	0	81.87	0	0	0	30.49	0	4.85	0	0	0	41.22	0	0	0	1.82	4.91	0	0	0	4.31	0	0	3.06	1.75
TWF2	0	2.02	3.46	4.36	0	3.37	0	2.83	0	0	4.47	22.43	0	71.83	34.17	5.67	15.71	7.27	81.87	0	3.15	11.23	4.36	81.87	0	3.49	3.96	15.91	82.45	0	0	3.86	0	3.68	10.42	3	1.45	0	1.7	2.77	0	1.75
CNN2	3.07	2.02	11.66	5.82	4.8	3.37	8.6	5.66	15.45	0	18.63	0	0	112.88	27.96	2.84	0	65.39	0	6.19	3.15	26.21	21.78	81.87	0	20.93	3.96	0	41.22	0	201.35	11.57	10.29	5.52	5.21	3	10.14	7.54	1.7	0	0	4.67
THSD1	2.3	2.02	2.16	0	7.2	2.24	0	0	0	0	1.49	0	11.72	0	18.64	0	2.1	0	0	0	0	0	0	0	0	0	3.96	0	0	2.87	0	7.71	0.61	0	0	0	0	0	3.41	0	0	0
GRB10	0.77	4.03	1.3	4.36	0	0	2.15	0.94	0	0	13.42	0	0	28.73	55.92	0	3.14	0	0	3.09	3.15	13.11	13.07	0	19.41	5.81	0	0	61.84	1.44	0	0	6.05	1.23	2.6	0	1.45	0	6.81	0	0	0.58
CTSV	9.2	0	4.32	3.64	2.4	24.69	4.3	2.83	0	55.3	27.58	37.38	7.82	106.72	301.33	5.67	18.86	0	0	0	3.15	41.19	69.7	0	9.71	0	45.55	12.73	133.98	12.92	0	7.71	10.29	1.23	10.42	6	2.9	5.39	5.96	13.86	3.06	0.58
AP1S2	3.07	0	2.59	1.45	1.2	0	2.15	7.55	0	0	0	0	0	0	12.43	2.84	1.05	0	0	0	0	0	4.36	0	4.85	1.16	0	0	0	0	0	0	0	0	0	0	0	0	1.7	0	0	0.58
TUBB6	3.83	2.02	7.77	2.91	4.8	3.37	6.45	3.77	0	0	0.75	0	19.54	192.92	90.09	5.67	2.1	0	0	0	0	26.21	30.49	0	0	0	1.98	0	144.28	8.61	50.34	0	13.92	3.68	0	1.5	5.79	2.16	3.41	2.77	4.08	8.17
TPTE2P5	3.07	0	3.02	0	0	0	0	0	0	0	0.75	0	0	4.1	0	0	0	3.63	0	0	4.73	5.62	8.71	0	0	1.16	0	0	0	0	0	0	0	0	0	0	0	0	0	0	0	1.75
TEAD1	0.77	6.05	4.75	2.91	1.2	6.73	15.06	0.94	23.18	0	2.24	0	3.91	127.25	62.13	17.02	1.05	25.43	81.87	0	3.15	3.74	26.14	81.87	9.71	2.33	0	3.18	154.59	2.87	201.35	0	3.03	3.68	3.91	1.5	21.72	3.23	1.7	0	5.1	2.92
ITPR3	0	2.02	1.3	0	0	0	0	0	0	0	2.98	0	0	8.21	6.21	2.84	0	10.9	0	6.19	0	0	17.42	0	0	2.33	0	0	20.61	0	0	0	0	1.23	0	0	0	0	0	2.77	0	0
STBD1	0	5.04	12.09	2.91	0	1.12	0	3.77	0	0	1.49	14.95	0	4.1	0	2.84	0	0	0	0	1.58	1.87	0	0	0	11.63	3.96	0	0	1.44	0	3.86	2.42	0	0	0	0	1.08	0.85	0	0	1.75
LINC00960	2.3	0	3.02	0	0	7.86	0	3.77	0	0	0	0	0	4.1	0	0	2.1	0	0	4.64	0	1.87	13.07	0	0	0	0	0	0	0	0	3.86	1.21	0	0	0	0	0	0	0	0	2.34
MMP19	3.07	4.03	3.46	2.18	6	1.12	4.3	2.83	7.73	0	3.73	0	0	36.94	31.07	0	3.14	0	81.87	1.55	0	0	43.56	0	0	0	0	0	41.22	0	0	0	4.24	6.75	0	0	1.45	1.08	1.7	0	1.02	1.75
GRAMD1C	0	0	0	0	1.2	1.12	8.6	0	0	0	0	0	0	6.16	15.53	8.51	0	0	0	0	1.58	0	13.07	0	4.85	2.33	0	0	10.31	0	0	0	0	0.61	0	1.5	1.45	0	0	0	0	0
LOC101927877	26.07	28.22	0	18.9	0	10.1	4.3	0	0	0	0	0	0	0	0	0	4.19	29.06	0	0	3.15	1.87	0	0	0	0	0	0	0	0	0	0	0	0	1.3	0	0	0	0.85	0	1.02	2.92
GNPTAB	1.53	0	0.86	0	1.2	1.12	0	0.94	7.73	0	0	0	0	8.21	18.64	0	0	0	0	6.19	0	0	8.71	0	9.71	1.16	0	3.18	10.31	0	0	0	1.21	2.45	0	0	1.45	0	0	0	0	0
TMSB10	286.77	229.81	334.32	353.37	323.78	301.92	466.72	313.2	1406.14	829.55	202	97.19	289.2	17816.5	7011.47	190.01	92.19	210.69	491.24	249.06	162.29	396.97	8263.42	982.48	475.57	240.7	915	140	17035.8	136.36	4329	219.86	508.82	453.32	209.68	109.5	485.19	357.78	396.1	454.46	258.92	423.25
C15orf48	3.07	4.03	5.18	1.45	2.4	42.65	12.9	7.55	30.9	110.61	94.66	0	109.43	864.04	493.94	499.13	11.52	36.33	0	1.55	75.63	28.09	52.27	0	184.4	46.51	51.49	44.55	752.34	74.64	0	0	16.94	5.52	1.3	1.5	84	8.62	48.55	16.63	6.12	4.09
MZB1	31.44	4.03	3.46	33.45	4.8	5.61	34.41	21.7	7.73	55.3	130.44	0	62.53	0	9.32	0	0	0	0	6.19	1.58	7.49	0	0	4.85	0	5.94	0	0	12.92	0	0	121.61	1.84	1.3	0	5.79	2.16	2.56	0	4.08	9.34
CENPW	0	6.05	0.43	0.73	1.2	2.24	0	1.89	0	0	0	0	0	0	0	5.67	3.14	0	0	0	0	13.11	8.71	0	0	0	0	0	20.61	0	0	0	0.61	0.61	1.3	0	0	0	0	0	0	1.17
CD68	0.77	6.05	3.46	0	0	1.12	0	0.94	7.73	55.3	4.47	7.48	3.91	14.37	24.85	0	2.1	0	0	0	3.15	0	13.07	0	14.56	0	17.82	0	61.84	0	0	0	2.42	2.45	1.3	4.5	1.45	0	0.85	0	0	1.17
PID1	2.3	5.04	4.75	0.73	9.59	11.22	0	0	0	0	32.05	0	11.72	112.88	108.73	0	4.19	61.75	0	1.55	11.03	13.11	21.78	0	19.41	15.12	27.73	25.45	10.31	2.87	100.67	3.86	1.82	0.61	0	0	2.9	4.31	1.7	16.63	1.02	2.34
DUSP27	0	0	0	0	0	1.12	0	0	0	0	4.47	0	0	4.1	9.32	0	0	3.63	0	0	0	0	4.36	0	0	0	3.96	0	0	0	0	7.71	0	1.84	0	0	0	0	0	0	0	0
CTPS2	0	7.06	6.48	0.73	0	2.24	0	2.83	0	0	0	7.48	0	0	6.21	0	0	10.9	0	0	1.58	0	0	0	24.26	0	1.98	0	0	0	0	0	4.24	0.61	0	3	0	0	0	0	0	0
TMEM191A	2.3	0	0.43	0.73	0	1.12	0	0	0	0	2.24	0	0	6.16	0	0	0	0	0	3.09	0	1.87	0	0	0	0	5.94	0	0	2.87	0	0	1.21	0	1.3	0	0	0	0	0	0	0
RASA4	1.53	2.02	4.32	5.09	0	8.98	0	5.66	0	0	8.2	14.95	11.72	0	0	5.67	4.19	14.53	0	0	1.58	3.74	0	0	0	0	0	0	0	2.87	0	0	4.24	0	0	0	1.45	0	2.56	0	0	0.58
ABAT	3.83	1.01	0	0	0	0	0	0	0	0	12.67	0	3.91	0	0	0	0	36.33	0	0	0	37.45	17.42	0	4.85	37.21	0	9.55	0	1.44	0	0	10.29	1.84	0	0	0	0	5.11	0	0	1.17
DSEL	3.07	0	0	0.73	7.2	2.24	36.56	0.94	0	0	7.45	0	35.17	104.67	40.39	19.85	13.62	14.53	0	0	6.3	0	39.2	81.87	0	6.98	1.98	9.55	92.75	1.44	0	0	0.61	0.61	0	1.5	2.9	1.08	0.85	16.63	0	0.58
LZTS2	6.9	2.02	0.43	5.09	0	1.12	0	0	0	0	3.73	14.95	0	0	3.11	0	2.1	0	0	15.47	4.73	3.74	0	0	0	11.63	3.96	0	0	0	0	0	2.42	0.61	0	0	0	1.08	0.85	0	0	1.17
PPARG	13.8	15.12	4.75	13.09	0	1.12	2.15	8.49	7.73	0	13.42	0	19.54	385.84	217.46	17.02	48.19	18.16	0	24.75	11.03	29.96	540.15	0	82.5	81.4	7.92	15.91	401.93	5.74	0	3.86	7.26	8.59	16.93	7.5	8.69	9.7	9.37	19.4	1.02	8.76
MTSS1L	3.83	0	0.86	1.45	1.2	7.86	12.9	0.94	23.18	55.3	5.96	7.48	3.91	2.05	0	5.67	2.1	7.27	0	1.55	6.3	0	0	81.87	19.41	12.79	1.98	9.55	0	4.31	151.01	3.86	9.08	1.23	1.3	0	5.79	4.31	1.7	0	2.04	3.5
C3orf52	0	1.01	0.86	0	0	0	0	0	0	0	1.49	0	0	6.16	18.64	0	2.1	0	0	0	0	1.87	26.14	0	0	13.95	9.9	3.18	20.61	0	0	0	0.61	0	3.91	0	0	0	0.85	0	0	0
RAB20	0	0	9.07	0.73	4.8	5.61	10.75	1.89	0	0	102.12	67.28	62.53	53.36	43.49	8.51	6.29	163.46	0	0	12.6	95.5	34.85	0	29.12	45.35	19.81	19.09	20.61	44.49	0	7.71	19.36	1.23	0	1.5	21.72	0	6.81	5.54	1.02	1.75
TTC39C	0	0	0.86	0.73	2.4	0	0	0	0	0	0	0	3.91	2.05	6.21	0	0	0	0	0	0	0	4.36	0	0	1.16	0	0	10.31	0	0	3.86	0.61	0	0	0	0	0	0	0	1.02	0.58
RPS4Y1	0	0	0	0	0	0	0	0	0	774.25	181.87	224.28	101.61	174.45	180.18	62.39	0	7.27	0	0	118.17	1.87	0	245.62	135.88	148.84	207.95	0	113.37	146.4	0	142.72	0	0	0	127.5	0	0	1.7	0	0	0
PGBD1	0.77	1.01	0	0	0	3.37	0	0.94	0	0	0	0	0	0	0	2.84	0	0	0	0	0	0	0	0	0	2.33	0	0	0	2.87	0	0	0	0.61	0	0	0	0	0	0	0	0
GADD45A	4.6	26.21	2.16	0.73	2.4	0	0	0.94	0	0	0	59.81	0	49.26	27.96	11.34	3.14	7.27	0	0	3.15	11.23	60.98	0	0	0	3.96	6.36	10.31	2.87	151.01	7.71	0.61	1.23	5.21	7.5	0	0	1.7	2.77	0	1.17
TET3	2.3	0	1.3	3.64	3.6	1.12	0	0.94	0	0	38.01	52.33	0	34.89	65.24	2.84	15.71	98.08	81.87	0	1.58	22.47	39.2	81.87	48.53	38.37	41.59	3.18	0	17.22	100.67	3.86	6.66	3.68	1.3	0	5.79	9.7	3.41	2.77	8.15	0
FN1	57.51	81.64	85.52	69.07	81.55	78.57	167.76	61.32	424.93	221.21	43.98	89.71	152.41	9672.77	5405.39	153.14	69.14	112.61	982.48	37.13	52	185.38	10293.3	1473.72	427.04	281.4	455.52	73.18	7770.71	12.92	3624.28	81	104.67	84.04	296.94	103.5	968.93	87.29	37.48	113.62	55.05	86.4
CNFN	8.43	1.01	72.13	0	0	0	0	0	0	0	0	89.71	82.07	0	0	59.56	0	0	0	0	34.66	0	0	0	0	2.33	0	0	0	0	100.67	131.15	1.82	5.52	0	12	0	3.23	0	0	1.02	2.92
ECHDC2	0	2.02	0.43	7.27	0	0	0	6.6	0	0	1.49	0	0	8.21	40.39	0	0	0	0	0	0	1.87	34.85	0	0	0	5.94	0	30.92	1.44	0	0	9.08	1.23	0	0	0	1.08	1.7	0	0	2.34
PLA2G10	3.83	9.07	6.91	5.82	2.4	3.37	4.3	6.6	15.45	55.3	10.44	22.43	19.54	219.6	130.47	5.67	0	14.53	0	0	1.58	5.62	156.82	0	4.85	38.37	5.94	0	164.9	7.18	50.34	7.71	22.39	7.36	0	6	13.03	9.7	0	0	2.04	4.09
ZNF558	0.77	0	0	1.45	0	0	0	0.94	0	0	3.73	0	7.82	6.16	9.32	2.84	1.05	3.63	0	0	1.58	7.49	8.71	0	4.85	2.33	0	0	0	2.87	0	0	0	1.23	0	1.5	0	0	0	0	0	0
FAM132A	0	0	15.12	0.73	17.99	2.24	2.15	0	7.73	0	2.24	0	0	41.05	31.07	0	2.1	0	0	1.55	0	0	13.07	0	4.85	10.47	0	0	10.31	0	0	0	1.82	1.84	0	0	0	0	0	0	2.04	2.92
UGCG	1.53	1.01	0.86	0	2.4	4.49	0	0	0	0	16.4	7.48	0	30.79	9.32	8.51	0	7.27	0	0	0	16.85	0	0	53.38	54.65	29.71	3.18	51.53	10.05	0	0	3.63	0.61	0	0	1.45	3.23	6.81	0	0	0.58
MLLT3	0.77	5.04	0	0	0	1.12	0	0	0	0	7.45	7.48	7.82	4.1	6.21	5.67	33.52	32.69	0	0	0	11.23	13.07	0	4.85	5.81	27.73	19.09	0	4.31	0	0	3.03	0	3.91	0	1.45	1.08	1.7	0	0	0
MAPRE2	0	1.01	9.5	0.73	2.4	2.24	4.3	0	0	0	5.22	0	0	73.88	173.97	0	0	47.22	0	0	9.45	0	174.24	0	38.82	168.61	25.75	0	133.98	0	0	0	11.5	1.23	0	6	26.07	0	0	0	1.02	1.17
IFITM1	10.73	15.12	18.57	31.27	32.38	33.67	60.22	33.02	115.89	55.3	64.85	0	27.36	3316.61	2575.33	11.34	1.05	3.63	0	18.56	293.07	26.21	1472.34	0	97.05	518.61	493.15	6.36	1308.86	2.87	201.35	7.71	58.69	50.3	0	61.5	205.66	23.71	10.22	24.94	15.29	39.7
LRRFIP1	0.77	5.04	4.32	7.27	2.4	3.37	10.75	3.77	7.73	0	0	0	7.82	262.7	90.09	2.84	12.57	0	0	7.73	3.15	24.34	326.7	0	9.71	5.81	7.92	0	113.37	1.44	100.67	0	7.26	7.97	10.42	0	11.59	1.08	3.41	0	2.04	4.09
PTTG1	0.77	0	0	0	1.2	1.12	0	3.77	0	0	0	0	0	0	0	0	0	21.8	0	0	4.73	24.34	17.42	0	4.85	0	0	6.36	0	0	0	0	0.61	1.23	0	0	0	2.16	0	0	0	0
DPY19L2	2.3	1.01	0.43	0	0	0	0	0	0	0	1.49	0	0	4.1	6.21	0	0	0	0	1.55	1.58	0	0	0	0	3.49	0	0	0	0	0	0	0	0	0	0	0	0	0.85	0	0	0
CCNG2	5.37	0	1.3	4.36	1.2	1.12	0	4.72	0	0	37.27	7.48	11.72	63.62	146.01	11.34	10.48	0	0	0	17.33	3.74	52.27	81.87	9.71	32.56	13.86	0	72.14	28.71	201.35	0	19.36	2.45	14.33	0	5.79	1.08	5.11	2.77	0	0.58
DDX3Y	0	0	0	0	0	0	0	0	0	0	61.12	97.19	42.99	38.99	99.41	102.09	0	3.63	0	0	99.26	0	0	163.75	111.61	72.09	47.53	0	0	67.46	0	50.14	0	0	0	37.5	0	0	1.7	0	0	0
SOX4	93.55	33.26	76.45	54.53	23.98	22.45	86.03	51.89	38.63	110.61	5.22	22.43	0	1266.31	559.18	14.18	8.38	10.9	327.49	23.2	7.88	61.79	1150	0	24.26	2.33	7.92	9.55	1587.12	0	100.67	0	53.85	36.19	3.91	6	65.17	42.03	0.85	2.77	18.35	39.7
ISG15	33.74	32.25	66.09	39.99	50.37	41.53	96.78	60.38	270.41	55.3	17.89	14.95	31.26	2805.58	1488.04	11.34	4.19	39.96	0	54.14	88.23	16.85	801.51	163.75	24.26	103.49	237.66	6.36	2823.84	5.74	151.01	15.43	85.31	68.09	9.12	61.5	89.8	38.8	0.85	0	24.46	64.22
LPCAT2	0	2.02	0.43	0	0	1.12	2.15	0	0	0	1.49	0	0	8.21	18.64	8.51	0	0	0	0	4.73	0	4.36	0	29.12	16.28	7.92	0	0	0	0	0	0	1.23	0	0	1.45	0	0	0	1.02	0
CXCR4	0	0	0	0	0	4.49	0	0	0	0	0.75	0	0	8.21	0	0	0	0	0	6.19	1.58	11.23	0	0	0	6.98	0	0	0	0	0	0	19.97	0	0	1.5	0	0	0	0	0	0.58
MX1	7.67	4.03	1.73	2.18	3.6	1.12	2.15	4.72	7.73	0	20.87	14.95	0	98.51	161.54	0	27.24	58.12	245.62	34.03	15.76	13.11	365.91	0	9.71	23.26	35.65	3.18	61.84	20.09	151.01	3.86	3.63	3.68	13.02	13.5	4.34	3.23	5.11	0	3.06	2.92
AARD	0.77	4.03	5.62	0	0	1.12	0	0	0	0	0	0	0	0	0	0	0	0	0	12.38	0	5.62	0	0	0	2.33	0	6.36	0	1.44	0	0	2.42	0	0	0	1.45	0	0	0	0	0
LOC100996693	3.07	5.04	8.64	0.73	1.2	0	0	0	0	0	2.24	0	0	12.31	0	0	0	0	0	1.55	0	0	0	0	0	0	0	0	0	0	0	0	8.47	0	0	0	1.45	0	0	0	0	0
HCAR2	2.3	0	2.16	0	1.2	1.12	12.9	0	0	0	0.75	7.48	0	6.16	27.96	28.36	2.1	0	0	0	20.48	5.62	104.55	0	9.71	11.63	23.77	3.18	20.61	0	50.34	0	2.42	1.84	3.91	0	4.34	0	0.85	0	0	0.58
GDF11	5.37	3.02	0.43	0	3.6	0	0	0	0	0	0	0	0	0	0	0	3.14	7.27	0	0	0	0	0	0	0	0	0	0	0	0	0	0	3.03	0	0	0	0	0	0.85	0	0	0
ZNF280C	0	1.01	2.59	0.73	9.59	1.12	0	0	0	0	2.24	22.43	0	0	0	0	4.19	3.63	0	1.55	0	0	0	0	0	1.16	0	0	0	0	0	7.71	0.61	0.61	1.3	0	0	0	0	0	0	0
KLC2	0.77	0	0.86	0	1.2	3.37	0	0.94	0	0	0.75	0	0	0	0	0	1.05	0	0	0	0	0	0	0	0	0	0	0	0	4.31	0	3.86	1.21	0	0	0	0	0	0	0	0	0.58
VAV2	0	2.02	0.43	0	0	0	0	0	0	0	2.24	0	0	6.16	9.32	0	0	0	0	6.19	0	1.87	17.42	0	0	0	0	0	0	1.44	0	0	0	0.61	0	0	0	0	0.85	0	0	0
PTH1R	0	1.01	1.73	0.73	1.2	6.73	2.15	0.94	0	0	3.73	0	0	96.46	40.39	0	1.05	0	0	0	0	0	26.14	0	0	1.16	3.96	0	51.53	0	100.67	0	2.42	0.61	0	4.5	0	1.08	1.7	0	2.04	0.58
TRIQK	2.3	0	0.86	0	0	0	4.3	0	0	55.3	0	0	0	59.52	37.28	0	0	0	0	0	0	0	13.07	0	0	0	0	0	51.53	0	0	0	0	0	2.6	0	0	0	4.26	0	0	0
DNAJC6	0	0	1.3	0	2.4	0	8.6	0.94	0	0	7.45	22.43	7.82	0	0	8.51	6.29	32.69	0	0	3.15	0	0	81.87	4.85	1.16	0	6.36	0	0	50.34	0	1.21	0.61	0	0	5.79	0	0	0	1.02	0
SPATA33	5.37	0	1.3	3.64	0	0	0	0	7.73	0	0	0	0	24.63	0	0	0	7.27	0	0	0	0	0	0	0	0	1.98	0	10.31	0	0	0	3.03	0.61	1.3	0	0	0	0	0	0	0
TCP10L	0.77	0	0.43	2.91	0	0	2.15	0	0	0	1.49	0	0	0	15.53	0	0	7.27	0	0	0	1.87	0	0	0	3.49	0	0	0	4.31	0	0	0	0	0	0	0	0	0	0	0	1.17
MAATS1	0	2.02	0	0	0	0	0	0	0	0	6.71	0	7.82	0	0	11.34	0	0	0	0	0	0	0	0	0	1.16	9.9	0	0	1.44	0	0	0	0	0	0	0	0	0	0	0	1.17
ARL13B	3.07	0	4.75	0	0	1.12	0	0.94	7.73	0	0	0	0	0	3.11	0	3.14	0	0	0	0	0	4.36	0	0	0	0	0	0	4.31	0	0	3.63	0	0	0	0	0	0	0	1.02	0
PTMS	0.77	0	0.43	0	0	1.12	0	0	15.45	0	0	0	0	6.16	6.21	0	3.14	0	0	0	0	0	17.42	0	0	0	11.88	0	0	0	0	0	0	0	0	0	0	0	0	0	0	1.75
CRTAP	0.77	0	0	0.73	0	0	0	0.94	7.73	0	0	0	0	104.67	90.09	5.67	1.05	0	0	0	0	0	30.49	0	0	2.33	0	0	51.53	0	50.34	0	0	1.84	0	0	0	0	1.7	5.54	0	0.58
CDC14B	3.07	0	0.43	0	2.4	0	21.51	0.94	0	0	0	7.48	0	8.21	6.21	0	1.05	0	0	1.55	0	0	8.71	0	0	0	0	0	0	4.31	0	0	0.61	1.84	0	0	0	0	0	0	0	0
MXRA8	1.53	0	0.43	0.73	0	0	0	0.94	0	0	12.67	7.48	3.91	92.36	96.3	0	2.1	0	0	0	0	0	108.9	81.87	9.71	1.16	9.9	0	30.92	1.44	0	0	2.42	0.61	0	9	1.45	0	0	0	0	1.75
LOC400927	1.53	0	0	0.73	0	0	0	1.89	0	0	1.49	0	0	6.16	0	0	6.29	0	0	0	0	0	0	0	0	5.81	0	0	0	0	0	0	7.26	0	0	0	0	0	0.85	0	0	0
GOLGA8B	0	0	0	0	0	0	0	0	0	0	14.91	0	0	6.16	9.32	0	4.19	0	0	0	0	0	0	0	0	6.98	1.98	0	0	4.31	0	0	0	0	1.3	0	0	0	0	0	0	0
LOC101928595	0	0	2.59	2.91	1.2	5.61	2.15	0.94	0	0	0.75	0	0	0	0	0	0	0	0	4.64	0	0	0	0	0	0	0	0	0	0	0	0	0.61	0	0	0	0	0	0	0	0	0.58
GLUD1P3	0	0	0	0	0	0	0	0	0	0	4.47	0	0	0	0	0	7.33	10.9	0	0	0	1.87	0	0	0	3.49	0	0	0	4.31	0	0	0.61	0	0	0	0	0	0.85	0	0	0
PASK	2.3	1.01	0	0	0	0	8.6	0	0	0	0	0	0	2.05	0	0	0	0	0	0	0	1.87	0	0	0	3.49	1.98	3.18	0	0	0	0	0	0.61	0	0	0	0	0	0	0	0
TBC1D22A-AS1	0.77	0	0	0	0	0	0	0	0	0	1.49	0	0	0	0	0	2.1	10.9	0	0	0	0	8.71	0	0	2.33	1.98	9.55	0	0	0	0	3.63	0	0	0	0	0	0	0	1.02	0
SOAT1	0.77	0	0.86	2.18	0	0	2.15	0.94	0	110.61	1.49	0	0	98.51	93.2	0	2.1	7.27	0	0	0	5.62	187.31	0	24.26	43.02	13.86	6.36	113.37	0	0	0	0.61	0.61	0	3	11.59	0	1.7	0	0	0.58
UBE2L6	2.3	4.03	6.91	5.09	4.8	4.49	2.15	2.83	15.45	0	3.73	0	66.44	229.86	478.41	2.84	3.14	0	81.87	1.55	4.73	3.74	561.93	0	14.56	5.81	5.94	0	422.55	1.44	352.36	7.71	2.42	2.45	7.81	6	13.03	8.62	11.07	0	1.02	5.25
CETP	0	0	2.59	0	0	12.35	0	0	0	0	10.44	29.9	0	0	0	107.77	0	0	0	7.73	22.06	0	0	0	19.41	5.81	55.45	3.18	10.31	67.46	0	27	0	0.61	0	0	1.45	0	0	5.54	1.02	0
NEIL1	0	4.03	3.89	0	3.6	3.37	0	0	0	0	0.75	7.48	0	0	15.53	0	0	0	0	0	0	0	8.71	0	0	0	7.92	0	0	0	0	0	3.03	0	1.3	0	0	0	0	0	0	0
CDH1	6.9	0	0.43	0	0	4.49	0	1.89	0	0	0	0	0	71.83	37.28	0	1.05	0	0	0	0	1.87	43.56	0	0	0	3.96	9.55	103.06	0	0	0	7.87	1.23	2.6	0	0.24	0	0.85	0	0.12	1.17
FGF7	0	1.01	0	0	0	0	0	0	0	0	5.22	0	0	0	0	0	0	0	0	0	0	9.36	0	0	4.85	0	0	0	0	7.18	0	0	1.82	0.61	0	0	0	0	0	0	0	0
COL4A2	0	1.01	5.62	2.18	1.2	2.24	6.45	1.89	0	0	8.94	7.48	23.45	591.08	136.69	79.41	5.24	21.8	0	0	17.33	20.6	339.77	81.87	9.71	4.65	13.86	9.55	566.83	0	553.71	3.86	2.42	6.75	0	0	33.31	2.16	2.56	2.77	2.04	1.17
EIF1AY	0	0	0	0	0	0	0	0	0	165.91	64.85	7.48	31.26	41.05	74.56	19.85	0	0	0	0	34.66	0	0	0	14.56	82.56	43.57	0	61.84	83.25	0	7.71	0	0	0	13.5	0	0	0.85	0	0	0
TNR	0	0	0.43	0	0	10.1	0	0	0	0	5.22	0	0	0	0	0	1.05	7.27	0	0	15.76	0	0	0	0	0	0	0	0	0	0	3.86	0	0	0	0	0	0	0.85	0	0	0
LY6E	25.3	20.16	34.99	23.99	23.98	23.57	38.71	23.58	123.62	55.3	5.96	14.95	50.8	2764.53	813.91	14.18	1.05	3.63	409.37	18.56	12.6	86.13	2687.68	163.75	38.82	6.98	15.84	15.91	1618.04	0	50.34	15.43	53.24	36.19	1.3	1.5	18.83	47.42	2.56	2.77	19.37	31.52
WIPF1	0	0	0.43	1.45	0	0	4.3	0	0	0	1.49	0	3.91	30.79	55.92	0	0	3.63	0	0	0	16.85	47.92	0	0	22.09	0	0	41.22	0	0	0	2.42	1.84	0	0	1.45	0	0	0	0	0.58
CEP78	0	11.09	1.73	0	0	0	0	0	0	0	0.75	0	3.91	6.16	3.11	0	2.1	0	0	0	0	3.74	0	0	0	0	0	0	0	0	0	3.86	0.61	0.61	0	0	0	0	0	0	0	0
GBP4	1.53	14.11	0.43	0.73	1.2	10.1	0	1.89	0	0	2.24	0	0	2.05	0	0	0	0	0	0	0	0	0	0	0	0	0	0	0	0	0	0	2.42	0	0	0	0	0	0	0	0	0.58
MCAM	0.77	0	0.43	2.91	6	3.37	2.15	0	0	331.82	87.21	0	3.91	248.34	46.6	8.51	0	0	81.87	1.55	0	1.87	13.07	0	19.41	0	3.96	3.18	51.53	2.87	50.34	0	0.61	0.61	0	1.5	1.45	0	0	11.08	0	0
LHFP	0.77	1.01	1.73	0.73	0	0	2.15	0	0	55.3	0	0	7.82	266.81	80.77	2.84	1.05	0	81.87	0	0	0	34.85	0	0	18.6	0	0	20.61	0	151.01	0	5.45	0.61	5.21	0	1.45	1.08	0	0	1.02	1.17
SLC16A2	6.13	0	2.16	0	0	0	0	0	0	0	15.65	37.38	11.72	2.05	0	0	0	0	0	0	0	31.83	34.85	0	29.12	3.49	11.88	0	10.31	4.31	0	0	2.42	0	0	0	2.9	0	0	0	0	0
PLS3	0	1.01	0	0	0	3.37	2.15	0.94	0	0	7.45	0	0	168.29	118.05	0	1.05	0	81.87	0	0	1.87	196.02	163.75	0	10.47	25.75	0	154.59	14.35	0	0	0	0	0	3	4.34	1.08	0	2.77	0	1.75
ALDH2	0	0	1.3	0	0	0	0	1.89	7.73	0	0	0	0	43.1	40.39	39.7	0	3.63	0	0	0	5.62	52.27	0	0	0	1.98	0	51.53	0	0	0	0.61	0	1.3	0	0	0	0	0	2.04	0
BAK1	0	0	0.86	2.18	0	0	0	0.94	0	0	0	0	7.82	18.47	3.11	0	2.1	10.9	0	1.55	0	0	4.36	0	0	3.49	3.96	0	0	2.87	0	0	4.84	0	0	0	0	0	0.85	0	0	0
TMEM160	0.77	0	0.86	0	0	0	0	0	0	0	0	0	0	20.52	0	0	0	3.63	0	0	9.45	3.74	26.14	0	0	0	0	0	30.92	0	0	0	0	0.61	0	0	0	0	0	0	0	0.58
PLAC8	0.77	0	2.16	2.91	1.2	3.37	10.75	2.83	7.73	0	6.71	7.48	7.82	1923.06	493.94	17.02	0	25.43	81.87	15.47	14.18	3.74	696.97	81.87	43.67	93.02	9.9	9.55	628.67	1.44	201.35	3.86	5.45	4.91	11.72	3	14.48	10.78	1.7	0	0	4.67
LOC101805491	13.8	7.06	2.16	2.91	0	5.61	0	0	0	0	10.44	0	0	0	0	5.67	7.33	0	0	0	4.73	16.85	0	0	43.67	15.12	0	0	0	18.66	0	0	3.03	1.23	0	0	0	0	0	0	0	0.58
COL4A1	5.37	0	12.96	7.27	3.6	4.49	27.96	7.55	23.18	55.3	11.18	14.95	0	1056.97	167.75	68.06	2.1	36.33	245.62	4.64	29.94	20.6	683.9	81.87	14.56	4.65	11.88	12.73	1989.06	1.44	553.71	0	7.26	3.68	0	4.5	28.97	1.08	3.41	8.31	4.08	5.25
NWD1	0.77	1.01	0	0	0	0	12.9	0	15.45	0	0	0	0	0	0	8.51	0	0	0	7.73	0	3.74	0	0	0	0	0	0	0	0	0	0	0.61	0	0	0	0	0	0	0	0	0.58
PLTP	3.07	2.02	2.16	0	4.8	1.12	2.15	0	0	55.3	29.82	0	85.98	281.17	62.13	0	4.19	10.9	0	0	0	9.36	113.26	0	4.85	0	0	9.55	103.06	2.87	0	0	1.21	0	5.21	0	0	1.08	0.85	0	0	1.75
MRLN	0	1.01	1.3	0	0	0	0	0	0	0	54.41	0	3.91	38.99	142.9	2.84	0	18.16	81.87	0	0	0	17.42	0	0	61.63	0	0	0	22.97	0	0	0	0	0	4.5	0	0	0	0	0	0
HLA-C	0	0	0.43	2.18	1.2	2.24	0	0	0	0	79.01	7.48	54.71	1079.54	400.74	5.67	2.1	0	81.87	0	33.09	1.87	291.86	81.87	43.67	0	17.82	9.55	463.77	17.22	0	3.86	0	0	1.3	12	4.34	1.08	0.85	5.54	1.02	0.58
CCDC28B	0.77	0	2.16	0	0	3.37	0	0	0	0	0	0	0	0	15.53	8.51	2.1	3.63	0	0	0	0	0	0	0	0	0	3.18	20.61	0	0	0	1.82	0.61	0	0	0	0	0	0	0	0
TSC22D3	3.07	11.09	9.07	2.18	4.8	1.12	6.45	0.94	15.45	0	130.44	0	7.82	759.37	1876.35	0	26.19	29.06	0	0	7.88	11.23	810.22	245.62	19.41	39.54	221.82	0	257.65	28.71	50.34	3.86	52.03	5.52	1.3	4.5	11.59	1.08	11.93	0	0	9.34
NOTUM	3.07	7.06	3.46	2.18	2.4	0	4.3	3.77	23.18	55.3	16.4	22.43	11.72	1485.91	400.74	82.24	14.67	21.8	163.75	3.09	12.6	44.94	570.64	163.75	58.23	5.81	29.71	19.09	906.93	1.44	1006.75	11.57	7.26	1.84	13.02	3	0	2.16	9.37	11.08	1.02	8.17
ADAM28	0.77	4.03	6.48	0	0	0	0	0	15.45	0	12.67	0	0	20.52	46.6	8.51	2.1	87.18	0	0	20.48	5.62	161.17	0	0	48.84	0	0	10.31	0	0	0	3.03	0	0	0	4.34	0	0	0	0	0
SLC22A18AS	0	0	0	0	0	0	0	0	0	0	2.98	0	0	18.47	12.43	0	0	0	0	0	4.73	0	0	0	0	8.14	17.82	0	0	0	0	0	0	0.61	0	0	0	0	0	0	0	0
RUNX1	0	0	0	0	0	0	0	0	0	0	2.24	0	11.72	28.73	21.75	2.84	1.05	0	0	0	0	5.62	4.36	0	9.71	0	0	0	0	0	0	0	4.84	0	0	0	0	0	0.85	0	0	0
ZWINT	0	8.06	0	0	0	0	0	0	0	0	0	0	0	10.26	9.32	0	0	0	0	1.55	0	11.23	8.71	0	0	0	0	0	20.61	0	0	0	0	0.61	0	0	0	0	0	0	0	0
HPGD	9.97	87.69	20.73	16	14.39	13.47	98.94	14.15	30.9	110.61	11.18	0	78.16	4667.07	1463.18	11.34	5.24	10.9	573.11	6.19	17.33	33.7	1454.92	163.75	53.38	11.63	97.05	9.55	1607.73	5.74	302.02	3.86	27.83	15.95	3.91	3	11.59	6.47	8.52	5.54	10.19	19.85
EPSTI1	1.53	0	0.43	0.73	0	0	4.3	0	0	0	0	29.9	0	246.28	164.65	0	0	3.63	163.75	0	0	0	331.06	0	0	18.6	5.94	0	164.9	0	0	0	0.61	1.84	0	0	4.34	0	0	0	0	0.58
CA2	0	1.01	1.3	0	1.2	0	6.45	0.94	0	0	0	0	3.91	605.45	375.89	0	0	3.63	163.75	3.09	1.58	16.85	378.98	0	0	2.33	0	12.73	1113.05	0	0	3.86	1.82	0.61	0	1.5	7.24	2.16	0.85	0	0	1.75
CTNNAL1	0	0	0	0	0	0	4.3	0	0	0	0	0	0	151.87	68.34	0	0	0	0	0	0	16.85	130.68	0	0	2.33	0	0	92.75	0	0	0	2.42	1.23	0	0	0	0	0	0	0	1.17
FAT2	0	0	0.43	0	0	0	0	0	0	0	0.75	7.48	0	41.05	6.21	2.84	0	0	0	1.55	1.58	0	17.42	0	4.85	1.16	0	3.18	20.61	0	50.34	0	0	0.61	0	0	0	0	0	0	0	0
ACRC	0	0	2.59	0	0	0	0	1.89	0	0	0.75	0	0	0	0	0	0	0	0	0	0	0	0	0	0	0	1.98	0	0	0	0	0	0.61	0	0	0	0	0	0	0	0	0
ASAP2	0	0	0	0	0	0	2.15	0.94	0	0	0	0	0	2.05	0	0	2.1	0	0	0	0	0	0	0	0	0	0	0	0	0	0	0	0	0	0	0	0	0	0	0	0	0
ASGR1	0	0	1.73	0	0	0	0	0	0	0	0	0	0	0	0	0	1.05	0	0	0	1.58	0	4.36	0	0	0	0	0	0	0	0	0	1.82	0	0	0	0	0	0	0	0	0
C1orf106	1.53	0	0	0.73	0	0	2.15	0	0	0	0	0	0	0	3.11	0	0	0	0	0	0	0	4.36	0	0	0	0	0	0	0	0	0	0.61	0	0	0	0	0	0	0	0	0
C2	0.77	0	1.3	0	0	0	0	0.94	0	0	0	0	0	6.16	9.32	0	0	0	0	6.19	0	0	4.36	0	0	3.49	0	0	10.31	0	0	0	0	0	0	0	0	0	0	0	0	0
CAMK4	2.3	0	2.16	0.73	1.2	0	2.15	0	0	0	0	0	0	0	0	0	2.1	0	0	0	0	0	0	0	0	0	0	0	0	0	0	0	0	0	0	0	0	0	0	0	0	0
CCDC168	2.3	0	1.3	2.18	2.4	0	0	0	0	0	0	0	0	0	0	0	1.05	3.63	0	0	0	0	0	0	0	2.33	0	0	0	0	0	0	0	0	0	0	0	0	0	0	0	0
CCDC34	0	0	3.46	0	0	5.61	6.45	0	0	0	3.73	0	0	0	0	0	0	0	0	0	0	3.74	0	0	0	0	3.96	0	0	0	0	0	0.61	0	0	0	0	0	0	0	0	0
CCDC8	0.77	0	0.86	0	1.2	0	0	0	0	0	0	0	0	0	0	0	1.05	0	0	0	0	0	0	0	0	0	0	0	0	0	0	0	2.42	0	0	0	0	0	0	0	0	0
CDIP1	0	8.06	0	0	0	2.24	0	0	0	0	0	0	0	0	6.21	0	4.19	3.63	0	0	0	1.87	0	0	0	1.16	0	0	0	0	0	0	0.61	0	0	0	0	0	0	0	0	0
CEMIP	0	0	0.43	0	0	0	0	0	0	0	6.71	0	3.91	2.05	0	0	0	7.27	0	0	0	0	0	0	0	1.16	0	0	0	0	0	0	0.61	0	0	0	0	0	0	0	0	0
COL4A5	0	1.01	0	0	1.2	0	0	0	0	0	0	0	0	0	0	0	0	0	0	0	3.15	0	0	0	4.85	0	3.96	0	0	0	0	0	3.63	0	0	0	0	0	0	0	0	0
DDR2	1.53	0	0.86	0	0	1.12	2.15	0	0	0	0	0	0	0	0	0	0	0	0	1.55	3.15	0	0	0	0	3.49	1.98	0	0	0	0	0	1.82	0	0	0	0	0	0	0	0	0
DQX1	5.37	9.07	5.18	0	0	0	0	0	0	0	0	0	0	0	0	0	0	0	0	1.55	0	1.87	0	0	0	0	0	0	0	0	0	0	0.61	0	0	0	0	0	0	0	0	0
DUXAP8	0	0	0	0	0	0	0	0	0	0	0.75	0	0	8.21	3.11	0	0	0	0	0	0	3.74	4.36	0	0	0	0	0	0	0	0	0	0	0	0	0	0	0	0	0	0	0
FABP5P3	3.07	0	0	1.45	0	0	0	1.89	0	0	0	0	0	0	0	0	2.1	0	0	0	0	0	0	0	0	0	0	0	0	0	0	0	0	0	0	0	0	0	0	0	0	0
FAM78A	0	0	0.86	0	0	1.12	0	0	0	0	3.73	0	0	20.52	49.7	0	0	0	0	0	0	0	39.2	0	0	24.42	7.92	0	41.22	0	151.01	0	1.82	0	0	0	0	0	0	0	0	0
FKBP1AP1	3.83	0	0.86	0	0	0	0	3.77	0	0	0.75	0	0	0	0	0	0	0	0	0	0	0	0	0	0	1.16	1.98	3.18	0	0	0	0	0	0	0	0	0	0	0	0	0	0
GAS6-AS1	0	4.03	1.73	3.64	2.4	0	0	0	0	0	0	0	0	0	0	0	0	0	0	0	0	0	0	0	0	0	0	0	0	0	0	0	0	0	0	0	0	0	0	0	0	0
GPR37L1	3.07	1.01	0.43	0	0	0	0	0	0	0	0.75	0	0	0	0	0	1.05	3.63	0	0	0	0	0	0	0	1.16	0	0	0	0	0	0	0	0	0	0	0	0	0	0	0	0
HCG14	3.07	0	2.16	1.45	3.6	0	0	0	0	0	0	0	0	0	0	0	0	0	0	0	0	0	0	0	0	2.33	0	0	0	0	0	0	2.42	0	0	0	0	0	0	0	0	0
HCG4	0	0	2.16	0	0	0	0	0	0	0	0	7.48	3.91	6.16	0	0	0	7.27	0	0	0	0	4.36	0	0	3.49	5.94	0	0	0	0	0	0.61	0	0	0	0	0	0	0	0	0
HEXDC	0	6.05	2.59	0	3.6	0	0	0.94	0	0	0	0	0	0	0	0	0	0	0	0	6.3	0	0	0	0	0	0	0	0	0	0	3.86	0	0	0	0	0	0	0	0	0	0
HIST1H2AK	0	1.01	0.43	0	0	0	0	1.89	0	0	0	0	3.91	4.1	0	0	7.33	3.63	0	0	1.58	0	0	0	0	3.49	0	0	0	0	0	0	0	0	0	0	0	0	0	0	0	0
HIST1H3A	3.83	0	2.59	0	0	0	0	2.83	0	0	2.98	0	0	2.05	0	8.51	7.33	0	0	0	0	0	0	0	4.85	1.16	3.96	0	0	1.44	0	0	1.21	0	0	0	0	0	0	0	0	0
HIST1H4D	0	0	2.59	0	0	0	0	0.94	0	0	0.75	0	0	0	0	0	0	0	0	0	3.15	0	0	0	0	0	0	0	0	1.44	0	0	0	0	0	0	0	0	0	0	0	0
HIST1H4E	0	0	2.16	2.18	0	0	19.36	4.72	0	0	2.24	0	0	0	0	0	2.1	0	0	1.55	3.15	0	8.71	0	0	1.16	0	0	0	8.61	0	0	7.26	0	0	0	0	0	0	0	0	0
HIST1H4K	2.3	0	0	0	0	0	0	0	0	0	0	0	0	0	0	0	2.1	0	0	0	0	0	0	0	0	1.16	0	0	0	4.31	0	0	6.05	0	0	0	0	0	0	0	0	0
INPP1	0	0	2.59	0	0	0	0	0	0	0	1.49	7.48	0	0	0	0	0	0	0	0	0	0	8.71	0	0	2.33	0	0	0	0	0	0	0.61	0	0	0	0	0	0	0	0	0
KANK2	0.77	0	3.02	0	0	2.24	0	2.83	0	0	1.49	0	0	0	21.75	0	0	3.63	0	0	0	0	17.42	0	9.71	0	0	0	0	0	0	0	0.61	0	0	0	0	0	0	0	0	0
LINC00456	0	0	0	0	0	0	0	0	0	0	2.98	0	0	4.1	0	0	1.05	7.27	0	0	0	0	0	0	0	4.65	0	0	0	0	0	0	0	0	0	0	0	0	0	0	0	0
LINC00654	0	0	0.43	0	0	0	0	0	0	0	0	0	0	2.05	6.21	0	0	3.63	0	0	0	0	0	0	0	0	5.94	0	0	0	0	0	0	0	0	0	0	0	0	0	0	0
LINC01087	1.53	2.02	0.43	0.73	0	0	0	0.94	0	0	0	0	0	0	0	0	0	0	0	0	0	0	0	0	0	0	0	0	0	0	0	0	0.61	0	0	0	0	0	0	0	0	0
LINC01191	0	0	0.43	0.73	0	0	0	0	0	0	0	0	0	0	0	0	0	0	0	0	6.3	0	0	0	0	6.98	0	0	0	5.74	0	0	1.82	0	0	0	0	0	0	0	0	0
LINC01419	0	1.01	0	0	0	0	0	0	0	0	0	0	0	0	0	0	1.05	0	0	0	0	1.87	0	0	0	1.16	0	0	0	0	0	0	0	0	0	0	0	0	0	0	0	0
LNP1	1.53	0	4.75	2.18	2.4	2.24	0	0	0	0	0	0	0	2.05	0	2.84	4.19	14.53	0	0	3.15	0	0	0	0	0	0	0	0	0	0	0	0.61	0	0	0	0	0	0	0	0	0
LOC100505658	0	3.02	0	0	0	0	0	0	0	0	0	0	0	0	3.11	0	4.19	0	0	0	0	0	0	0	0	0	0	0	0	2.87	0	0	0	0	0	0	0	0	0	0	0	0
LOC100505716	1.53	0	0	0	0	0	0	1.89	0	0	0	0	0	0	0	0	1.05	0	0	0	0	0	0	0	0	1.16	0	0	0	0	0	0	0	0	0	0	0	0	0	0	0	0
LOC103344931	0	1.01	0	0	0	0	0	0.94	0	0	1.49	0	0	0	0	0	0	0	0	0	0	0	0	0	0	0	0	0	0	0	0	0	0.61	0	0	0	0	0	0	0	0	0
LOC105274304	2.3	1.01	0	0	0	0	0	0	0	0	0	0	0	0	0	0	2.1	0	0	0	1.58	0	0	0	0	0	0	0	0	0	0	0	0	0	0	0	0	0	0	0	0	0
LOC105371849	0.77	0	0.43	0	0	1.12	0	1.89	0	0	0	0	0	0	0	0	0	0	0	0	0	0	0	0	0	0	0	0	0	0	0	0	0.61	0	0	0	0	0	0	0	0	0
LOC171391	0	0	4.75	4.36	0	7.86	0	0	0	0	0	0	0	0	0	0	0	0	0	0	0	0	0	0	0	6.98	3.96	0	0	1.44	0	0	0.61	0	0	0	0	0	0	0	0	0
MEIOC	0.77	0	0	0	0	0	0	0	0	0	0	7.48	0	0	0	0	0	0	0	0	4.73	3.74	0	0	0	0	3.96	0	0	0	0	0	0	0	0	0	0	0	0	0	0	0
MYO18A	0	0	0	0	0	12.35	0	0	0	0	2.98	0	0	2.05	12.43	0	0	0	0	0	0	0	8.71	0	0	0	0	0	0	0	0	0	4.84	0	0	0	0	0	0	0	0	0
NACC1	0.77	0	0	0.73	0	1.12	0	0	0	0	0	0	0	0	3.11	0	0	7.27	0	0	0	3.74	0	0	0	0	0	0	0	1.44	0	0	0	0	0	0	0	0	0	0	0	0
NDUFA4L2	1.53	0	0	0.73	0	0	0	1.89	0	0	2.98	14.95	0	0	0	0	0	0	0	1.55	1.58	0	0	0	0	0	3.96	0	0	2.87	0	0	0.61	0	0	0	0	0	0	0	0	0
NEK5	0	1.01	0	0	1.2	0	0	0	0	0	0.75	0	0	2.05	0	0	0	0	0	1.55	0	0	0	0	0	0	0	0	0	0	0	0	0	0	0	0	0	0	0	0	0	0
NUDT13	0.77	0	0.86	3.64	7.2	0	2.15	3.77	0	0	2.24	0	0	6.16	0	0	1.05	0	0	0	0	0	0	0	0	0	0	0	0	0	0	0	1.21	0	0	0	0	0	0	0	0	0
OAS3	0.77	0	0	0	0	0	0	0	0	0	0	0	0	26.68	18.64	0	0	0	0	0	0	1.87	17.42	0	0	0	5.94	0	0	0	0	0	0.61	0	0	0	0	0	0	0	0	0
OPN3	2.3	8.06	0	0	0	0	0	0	0	0	0	0	0	4.1	0	8.51	0	0	0	0	0	0	0	0	0	5.81	0	0	0	0	0	0	0	0	0	0	0	0	0	0	0	0
PARD6G	0	1.01	0	0	1.2	0	0	0	0	0	0	0	0	4.1	3.11	0	1.05	0	0	1.55	0	0	0	0	0	0	0	3.18	10.31	0	0	0	0.61	0	0	0	0	0	0	0	0	0
PCDHB9	0.77	2.02	0.86	0	1.2	2.24	2.15	0	0	0	0	0	0	0	0	0	0	0	0	0	0	0	0	0	0	0	0	0	0	0	0	0	0.61	0	0	0	0	0	0	0	0	0
PDIA3P1	2.3	0	0.43	0	1.2	2.24	0	0	0	0	2.24	0	0	0	3.11	2.84	4.19	0	0	0	0	0	0	0	0	0	0	0	0	0	0	0	0	0	0	0	0	0	0	0	0	0
PDSS1	0	0	0	2.91	0	0	0	0	0	0	1.49	0	0	0	0	0	2.1	0	0	0	0	0	0	0	0	1.16	0	3.18	0	0	0	0	0	0	0	0	0	0	0	0	0	0
PLEKHG2	0	0	0.86	1.45	0	0	0	0	0	0	0	0	0	6.16	0	8.51	0	0	0	0	0	3.74	0	0	0	0	0	0	10.31	0	0	0	3.03	0	0	0	0	0	0	0	0	0
PRC1-AS1	0	0	0.86	0	0	0	0	0	0	0	2.24	0	0	2.05	0	0	0	0	0	0	0	0	0	0	0	1.16	0	0	0	0	0	0	1.21	0	0	0	0	0	0	0	0	0
PRPS1	0	0	0.43	0	1.2	1.12	0	0	0	0	0	0	0	2.05	3.11	0	0	0	0	0	0	0	0	0	0	0	0	0	0	0	0	0	0.61	0	0	0	0	0	0	0	0	0
RAB42	0	4.03	2.59	0	0	0	0	0	0	0	0	7.48	0	0	0	0	0	0	0	0	0	7.49	0	0	0	0	0	0	0	0	0	0	3.03	0	0	0	0	0	0	0	0	0
RAD9A	0	1.01	0.86	0	0	0	2.15	0	0	0	0.75	0	0	0	0	0	0	0	0	0	0	0	0	0	0	0	0	0	0	0	0	0	1.21	0	0	0	0	0	0	0	0	0
RBBP8NL	0	1.01	4.32	0	3.6	0	0	0	0	0	0	0	0	0	3.11	0	0	0	0	1.55	0	0	0	0	0	0	1.98	0	0	0	0	0	0	0	0	0	0	0	0	0	0	0
RGP1	0	1.01	1.73	1.45	0	0	8.6	0.94	0	0	0	0	0	0	0	0	0	0	0	1.55	0	0	0	0	9.71	0	0	0	0	0	0	0	0.61	0	0	0	0	0	0	0	0	0
SLC1A2	0	0	0	0	0	0	2.15	0	0	0	0	0	0	0	0	0	0	0	0	0	3.15	3.74	0	0	0	0	0	0	0	0	0	0	1.82	0	0	0	0	0	0	0	0	0
SLC22A15	0	0	0	1.45	1.2	0	0	2.83	0	0	0	0	0	0	0	0	0	0	0	0	0	0	0	0	0	0	0	0	0	1.44	0	0	0.61	0	0	0	0	0	0	0	0	0
SLC25A20	0	3.02	3.89	0.73	3.6	2.24	0	0	0	0	0	0	0	6.16	0	0	1.05	3.63	0	0	0	0	0	0	0	0	0	3.18	0	2.87	0	0	0	0	0	0	0	0	0	0	0	0
SLC2A14	0	0	0	0	0	0	0	4.72	0	0	1.49	0	0	0	0	0	0	3.63	0	7.73	0	0	4.36	0	0	16.28	19.81	0	0	1.44	0	0	3.03	0	0	0	0	0	0	0	0	0
SMG7-AS1	2.3	0	8.21	0	0	1.12	6.45	0	0	0	0	0	0	0	0	0	0	7.27	0	0	0	7.49	0	0	0	0	1.98	3.18	0	0	0	0	6.05	0	0	0	0	0	0	0	0	0
SPATA22	0	0	0	0	0	0	0	0	0	0	0	0	0	22.58	9.32	0	0	0	0	0	0	0	30.49	0	0	0	0	0	30.92	0	50.34	0	0	0	0	0	0	0	0	0	0	0
SPC25	1.53	0	0.43	0	0	1.12	0	0.94	0	0	0	0	0	0	0	0	0	0	0	0	0	0	0	0	0	1.16	0	0	0	0	0	0	0.61	0	0	0	0	0	0	0	0	0
SPDYA	3.07	0	0.86	0	0	0	0	0	0	0	1.49	0	0	0	0	0	5.24	0	0	3.09	0	11.23	0	0	0	1.16	0	0	0	0	0	0	0	0	0	0	0	0	0	0	0	0
SPDYE6	0.77	0	0	0	0	1.12	0	0	0	0	0.75	0	0	0	0	0	0	0	0	0	1.58	0	0	0	0	0	0	0	0	0	0	0	0.61	0	0	0	0	0	0	0	0	0
ST8SIA1	0	0	0	0	1.2	0	0	0	0	0	0	7.48	0	14.37	12.43	0	0	0	0	0	0	0	0	0	0	0	0	3.18	0	0	0	0	1.21	0	0	0	0	0	0	0	0	0
TMEM191B	2.3	0	0	0	0	0	0	0	0	0	0.75	0	0	2.05	0	0	0	0	0	0	0	1.87	0	0	0	6.98	1.98	0	0	1.44	0	0	2.42	0	0	0	0	0	0	0	0	0
TNK1	0	0	0	0	0	0	0	0	0	0	0	7.48	0	6.16	0	0	0	0	0	0	4.73	0	0	0	9.71	1.16	0	0	0	0	0	0	0	0	0	0	0	0	0	0	0	0
TP73	0	0	0	0.73	0	11.22	0	0	0	0	0	0	0	0	0	0	3.14	0	0	0	0	7.49	0	0	0	0	0	0	0	0	0	3.86	1.82	0	0	0	0	0	0	0	0	0
TSNARE1	0	0	0	0	0	0	0	0	0	0	2.24	0	0	0	0	0	0	0	0	0	0	1.87	0	0	0	2.33	0	0	0	0	0	0	1.82	0	0	0	0	0	0	0	0	0
TTC23	6.13	1.01	0.43	0	0	0	0	4.72	0	0	14.16	0	3.91	4.1	3.11	0	0	3.63	0	0	4.73	0	0	0	9.71	0	7.92	0	10.31	5.74	0	0	1.21	0	0	0	0	0	0	0	0	0
TTTY15	0	0	0	0	0	0	0	0	0	55.3	11.18	14.95	7.82	14.37	24.85	0	0	0	0	0	3.15	0	0	0	4.85	2.33	0	0	20.61	0	0	0	0	0	0	0	0	0	0	0	0	0
UBAP1L	2.3	1.01	2.59	0	1.2	0	0	0	0	0	0	0	0	0	0	0	0	0	0	0	0	0	0	0	0	0	0	0	0	0	0	0	0.61	0	0	0	0	0	0	0	0	0
USP9Y	0	0	0	0	0	0	0	0	0	0	5.22	7.48	0	14.37	9.32	0	1.05	0	0	0	0	0	0	0	9.71	1.16	0	0	30.92	0	0	0	0	0	0	0	0	0	0	0	0	0
ZBTB20	0	0	0	2.91	0	0	2.15	0	0	0	2.24	0	0	0	0	0	0	0	0	3.09	0	0	0	0	0	2.33	0	0	0	0	0	0	0	0	0	0	0	0	0	0	0	0
ZNF337	3.83	0	0.43	2.18	0	0	0	0	7.73	0	0.75	0	3.91	0	0	0	0	0	0	0	0	0	0	0	0	0	0	0	0	1.44	0	0	7.26	0	0	0	0	0	0	0	0	0
ZNF607	0	0	2.16	1.45	0	0	0	0	0	0	2.24	0	0	2.05	0	0	1.05	0	0	0	0	1.87	0	0	0	0	3.96	0	0	0	0	0	0	0	0	0	0	0	0	0	0	0
ZNF687	0	5.04	3.46	0	0	0	0	0	0	0	0	0	0	0	6.21	0	0	0	0	0	1.58	0	0	0	0	0	3.96	0	0	0	0	0	0	0	0	0	0	0	0	0	0	0
ZSCAN20	3.07	0	0	0	0	0	0	0	0	0	3.73	0	0	0	0	0	0	0	0	0	0	3.74	0	0	0	0	5.94	0	0	0	0	0	0	0	0	0	0	0	0	0	0	0
