# Supplementary material for: Single-Cell RNA-seq Identifies Cell Subsets in Human Placenta That Highly Expresses Factors Driving Pathogenesis of SARS-CoV-2
Source: Front Cell Dev Biol. 2020 Aug 19;8:783. doi: 10.3389/fcell.2020.00783 (PMC7466449; doi:10.3389/fcell.2020.00783)
Supplement: Supplementary file 11 [file Table_5.XLSX]

## Sheet: 2nd Trimester EVT
Supplementary Table 5: Differentially abundant genes in ACE2+ TMPRSS2+ and ACE2- TMPRSS2- cells of second trimester EVT. Data is from Liu et al 2018 (Accession number GSE89497).
Gene	ACE2-TMPRSS-1	ACE2-TMPRSS-2	ACE2-TMPRSS-3	ACE2-TMPRSS-4	ACE2-TMPRSS-5	ACE2-TMPRSS-6	ACE2-TMPRSS-7	ACE2-TMPRSS-8	ACE2-TMPRSS-9	ACE2-TMPRSS-10	ACE2-TMPRSS-11	ACE2-TMPRSS-12	ACE2-TMPRSS-13	ACE2-TMPRSS-14	ACE2-TMPRSS-15	ACE2-TMPRSS-16	ACE2-TMPRSS-17	ACE2-TMPRSS-18	ACE2-TMPRSS-19	ACE2-TMPRSS-20	ACE2-TMPRSS-21	ACE2-TMPRSS-22	ACE2-TMPRSS-23	ACE2-TMPRSS-24	ACE2-TMPRSS-25	ACE2-TMPRSS-26	ACE2-TMPRSS-27	ACE2-TMPRSS-28	ACE2-TMPRSS-29	ACE2-TMPRSS-30	ACE2-TMPRSS-31	ACE2-TMPRSS-32	ACE2-TMPRSS-33	ACE2-TMPRSS-34	ACE2-TMPRSS-35	ACE2-TMPRSS-36	ACE2-TMPRSS-37	ACE2-TMPRSS-38	ACE2-TMPRSS-39	ACE2-TMPRSS-40	ACE2-TMPRSS-41	ACE2-TMPRSS-42	ACE2-TMPRSS-43	ACE2-TMPRSS-44	ACE2-TMPRSS-45	ACE2-TMPRSS-46	ACE2-TMPRSS-47	ACE2-TMPRSS-48	ACE2-TMPRSS-49
ACE2	0	0	0	0	0	0	0	0	0	0	0	0	0	0	0	0	0	0	0	0	0	0	0	0	0	0	0	0	0	0	0	0	0	0	0	0	0	0	0	0	0	0	0	0	0	0	0	0	0
TMPRSS2	0	0	0	0	0	0	0	0	0	0	0	0	0	0	0	0	0	0	0	0	0	0	0	0	0	0	0	0	0	0	0	0	0	0	0	0	0	0	0	0	0	0	0	0	0	0	0	0	0
MAOB	0	0	0	0	0	0	0	0	0	0	0	0	0	0	0	0	0	0	0	0	0	0	0	0	0	0	0	0	0	0	0	0	0	0	0	0	0	0	0	0	0	0	0	0	0	0	0	0	0
KCNE2	0	0	0	0	0	0	0	0	0	0	0	0	0	0	0	0	0	0	0	0	0	0	0	0	0	0	0	0	0	0	0	0	0	0	0	0	0	0	0	0	0	0	0	0	0	0	0	0	0
SMIM3	0	0	0	0	0	0	0	0	0	0	0	0	0	0	0	0	0	0	0	0	0	0	0	0	0	0	0	0	0	0	0	0	0	0	0	0	0	0	0	0	0	0	0	0	0	0	0	0	0
LOC101929523	0	0	0	0	0	0	0	0	0	0	0	0	0	0	0	0	0	0	0	0	0	0	0	0	0	0	0	0	0	0	0	0	0	0	0	0	0	0	0	0	0	0	0	0	0	0	0	0	0
TRPC1	0	0	0	0	0	0	0	0	0	0	0	0	0	0	0	0	0	0	0	0	0	0	0	0	0	0	0	0	0	0	0	0	0	0	0	0	0	0	0	0	0	0	0	0	0	0	0	0	0
POT1-AS1	0	0	0	0	0	0	0	0	0	0	0	0	0	0	0	0	0	0	0	0	0	0	0	0	0	0	0	0	0	0	0	0	0	0	0	0	0	0	0	0	0	0	0	0	0	0	0	0	0
AEBP1	0	0	0	0	0	0	0	0	0	0	0	0	0	0	0	0	0	0	0	0	0	0	0	0	0	0	0	0	0	0	0	0	0	0	0	0	0	0	0	0	0	0	0	0	0	0	0	0	0
TFEC	0	0	0	0	0	0	0	0	0	0	0	0	0	0	0	0	0	0	0	0	0	0	0	0	0	0	0	0	0	0	0	0	0	0	0	0	0	0	0	0	0	0	0	0	0	0	0	0	0
VCAM1	0	0	0	0	0	0	0	0	0	0	0	0	0	0	0	0	0	0	0	0	0	0	0	0	0	0	0	0	0	0	0	0	0	0	0	0	0	0	0	0	0	0	0	0	0	0	0	0	0
TRIM47	0	0	0	0	0	0	0	0	0	0	0	0	0	0	0	0	0	0	0	0	0	0	0	0	0	0	0	0	0	0	0	0	0	0	0	0	0	0	0	0	0	0	0	0	0	0	0	0	0
MKRN2OS	0	0	0	0	0	0	0	0	0	0	0	0	0	0	0	0	0	0	0	0	0	0	0	0	0	0	0	0	0	0	0	0	0	0	0	0	0	0	0	0	0	0	0	0	0	0	0	0	0
LINC01426	0	0	0	0	0	0	0	0	0	0	0	0	0	0	0	0	0	0	0	0	0	0	0	0	0	0	0	0	0	0	0	0	0	0	0	0	0	0	0	0	0	0	0	0	0	0	0	0	0
IL32	0	0	0	0	0	0	0	0	0	0	0	0	0	0	0	0	0	0	0	0	0	0	0	0	0	0	0	0	0	0	0	0	0	0	0	0	0	0	0	0	0	0	0	0	0	0	0	0	0
ZNF470	0	0	0	0	0	0	0	0	0	0	0	0	0	0	0	0	0	0	0	0	0	0	0	0	0	0	0	0	0	0	0	0	0	0	0	0	0	0	0	0	0	0	0	0	0	0	0	0	0
METRNL	0	0	0	0	0	0	0	0	0	0	0	0	0	0	0	0	0	0	0	0	0	0	0	0	0	0	0	0	0	0	0	0	0	0	0	0	0	0	0	0	0	0	0	0	0	0	0	0	0
RAMP2	0	0	0	0	0	0	0	0	0	0	0	0	0	0	0	0	0	0	0	0	0	0	0	0	0	0	0	0	0	0	0	0	0	0	0	0	0	0	0	0	0	0	0	0	0	0	0	0	0
SLC28A2	0.87	0	0	0	0	0	0	0	0	0	0	0	0	0	0	0	0	0	0	0	0	0	0	0	0	0	0	0	0	0	0	0	0	0	0	0	0	0	0	0	0	0	0	0	0	0	0	0	0
SALL4	0.87	0	0	0	0	0	0	0	0	0	0	0	0	0	0	0	0	0	0	0	0	0	0	0	0	0	0	0	0	0	0	0	0	0	0	0	0	0	0	0	0	0	0	0	0	0	0	0	0
LOC105372440	0.87	0	0	0	0	0	0	0	0	0	0	0	0	0	0	0	0	0	0	0	0	0	0	0	0	0	0	0	0	0	0	0	0	0	0	0	0	0	0	0	0	0	0	0	0	0	0	0	0
SLC51A	0	0	0	0	0	0	0	0	0	0	0	0	0	0	0	0	0	0	0	0	0	0	0	0	0	0	0	0	0	0	0	0	0	0	0	0	0	0	0	0	0	0	0	0	0	0	0	0	0
ATP1A2	0	0	0	0	0	0	0	0	0	0	0	0	0	0	0	0	0	0	0	0	0	0	0	0	0	0	0	0	0	0	0	0	0	0	0	0	0	0	0	0	0	0	0	0	0	0	0	0	0
BIK	0	0	0	0	0	0	0	0	0	0	0	0	0	0	0	0	0	0	0	0	0	0	0	0	0	0	0	0	0	1.81	0	0	0	0	0	0	0	0	0	0	0	0	0	0	0	0	0	0	0
DNHD1	0	0	0	0	0	0	0	0	0	0	0	0	0	0	0	0	0	0	0	0	0	0	0	0	0	0	0	0	0	1.81	0	0	0	0	0	0	0	0	0	0	0	0	0	0	0	0	0	0	0
ZNF382	0	0	0	0	0	0	0	0	0	0	0	0	0	0	0	0	0	0	0	0	0	0	0	0	0	0	0	0	0	0	0	0	0	0	0	0	0	0	0	0	0	0	0	0	0	0	1.83	0	0
LCMT1-AS1	0	0	0	0	0	0	1.88	0	0	0	0	0	0	0	0	0	0	0	0	0	0	0	0	0	0	0	0	0	0	0	0	0	0	0	0	0	0	0	0	0	0	0	0	0	0	0	0	0	0
WEE2-AS1	0	0	0	0	0	0	0	0	0	0	0	0	0	0	0	2.53	0	0	0	0	0	0	0	0	0	0	0	0	0	0	0	0	0	0	0	0	0	0	0	0	0	0	0	0	0	0	0	0	0
MDFI	0	0	0	0	0	0	0	0	0	0	0	0	0	0	0	2.53	0	0	0	0	0	0	0	0	0	0	0	0	0	0	0	0	0	0	0	0	0	0	0	0	0	0	0	0	0	0	0	0	0
HIST3H2BB	0	0	0	0	0	0	0	0	0	0	0	0	0	0	0	2.53	0	0	0	0	0	0	0	0	0	0	0	0	0	0	0	0	0	0	0	0	0	0	0	0	0	0	0	0	0	0	0	0	0
LOC101928371	0	0	0	0	0	0	0	0	0	0	1.13	0	0	0	0	0	0	0	0	0	0	0	0	0	0	0	0	0	0	0	0	0	0	0	0	0	0	0	0	0	0	0	0	0	0	0	0	0	0
LOC101927151	0	0	0	0	0	0	0	0	0	0	0	0	0	0	0	0	0	0	0	0	0	0	0	0	0	0	0	0	0	1.81	0	0	0	0	0	0	0	0	0	0	0	0	0	0	0	0	0	0	0
C2orf81	0	0	0	0	0	0	0	0	0	0	3.4	0	0	0	0	0	0	0	0	0	0	0	0	0	0	0	0	0	0	0	0	0	0	0	0	0	0	0	0	0	0	0	0	0	0	0	0	0	0
CDK1	0.87	0	0	0	0	0	0	0	0	0	0	0	0	0	0	0	0	0	0	0	0	0	0	0	0	0	0	0	0	0	0	0	2.59	0	0	0	0	0	0	0	0	0	0	0	0	0	0	0	0
LINC01556	0	0	0	0	0	0	0	0	0	0	0	0	0	0	0	0	0	0	0	0	0	0	0	0	0	0	0	0	0	1.81	0	0	0	1.94	0	0	0	0	0	0	0	0	0	0	0	0	0	0	0
CGN	0	0	0	0	0	0	0	0	0	0	0	0	0	0	0	0	0	0	0	0	4.2	0	0	0	0	0	0	0	0	0	0	0	0	0	0	0	0	0	0	0	0	0	0	0	0	0	0	0	0
ESRG	0	0	0	0	0	0	0	0	0	0	0	0	0	0	0	0	0	0	0	0	0	0	0	0	0	2.4	0	0	0	0	0	0	0	0	0	0	0	0	0	0	0	0	0	0	0	0	1.83	0	0
FRMD6-AS2	0	0	0	0	0	0	0	0	0	0	0	0	0	0	0	2.53	0	0	0	0	0	0	0	0	0	0	0	0	0	1.81	0	0	0	0	0	0	0	0	0	0	0	0	0	0	0	0	0	0	0
LOC101928617	0	0	0	0	0	0	0	0	0	0	0	0	0	0	0	2.53	0	0	0	0	0	0	0	0	0	0	0	0	0	0	0	0	0	1.94	0	0	0	0	0	0	0	0	0	0	0	0	0	0	0
CYP2W1	1.75	0	0	0	0	0	0	1.21	0	0	0	0	0	0	0	0	0	0	0	0	0	1.91	0	0	0	0	0	0	0	0	0	0	0	0	0	0	0	0	0	0	0	0	0	0	0	0	0	0	0
RGL1	0	0	0	0	0	0	0	0	0	0	0	0	0	0	0	2.53	0	0	0	0	0	0	0	0	0	0	0	0	0	0	0	0	0	0	2.56	0	0	0	0	0	0	0	0	0	0	0	0	0	0
JMJD7	0	0	0	0	0	0	0	0	0	0	0	0	0	0	0	0	0	0	0	2.58	0	0	0	0	0	0	0	0	0	0	0	0	2.59	0	0	0	0	0	0	0	0	0	0	0	0	0	0	0	0
LINC00342	0	0	0	0	0	0	0	0	0	0	0	0	0	0	0	0	0	0	3.37	0	0	0	0	0	0	0	0	0	0	1.81	0	0	0	0	0	0	0	0	0	0	0	0	0	0	0	0	0	0	0
LOC101927447	0	0	0	0	0	0	0	0	0	0	0	0	0	0	0	0	0	0	0	0	0	0	0	0	0	0	0	0	0	1.81	0	0	0	0	0	0	0	0	0	0	0	0	0	0	0	0	0	0	0
ARHGEF10L	0	0	0	0	0	0	0	0	0	0	0	0	0	0	0	0	0	0	0	0	0	0	0	0	0	0	0	0	0	0	0	0	0	0	0	0	0	0	0	0	0	0	0	0	0	0	0	0	0
OVGP1	0	0	0	0	0	0	0	0	0	0	0	0	0	0	0	2.53	0	0	0	0	0	0	0	0	0	0	0	0	0	3.62	0	0	0	0	0	0	0	0	0	0	0	0	0	0	0	0	0	0	0
WDFY3-AS2	0	0	0	0	0	0	0	0	0	0	0	0	0	0	0	0	0	0	0	0	0	0	0	0	0	0	0	0	0	3.62	0	0	2.59	0	0	0	0	0	0	0	0	0	0	0	0	0	0	0	0
PIAS2	0.87	0	0	0	0	0	0	0	0	0	0	0	0	0	0	0	0	0	0	0	0	0	0	0	0	0	0	0	0	5.43	0	0	0	0	0	0	0	0	0	0	0	0	0	0	0	0	0	0	0
C11orf45	2.62	0	0	0	0	0	1.88	0	0	0	0	0	0	0	0	0	0	0	0	0	0	0	0	0	0	0	0	0	0	0	0	0	0	1.94	0	0	0	0	0	0	0	0	0	0	0	0	0	0	0
ZNF658	0	0	0	0	0	0	0	0	0	0	0	0	0	0	0	0	0	0	0	0	0	0	0	0	0	0	0	0	0	1.81	0	0	0	0	2.56	0	0	0	0	0	0	0	0	0	0	0	0	0	0
CEP295NL	0	0	0	0	0	0	0	0	0	0	0	0	0	0	0	0	0	0	3.37	0	0	0	0	0	0	0	0	0	0	0	0	0	0	0	0	0	0	0	0	0	0	0	0	0	0	0	0	0	0
PARD3B	0	0	0	0	0	0	0	0	0	0	1.13	0	0	0	0	0	0	0	3.37	0	0	0	0	0	0	0	0	0	0	0	0	0	0	0	2.56	0	0	0	0	0	0	0	0	0	0	0	0	0	0
TTC28	0	0	0	0	0	0	0	0	0	0	0	0	0	0	0	0	0	0	0	0	0	0	0	0	0	0	0	0	0	0	0	0	0	0	0	0	0	0	5.01	0	0	0	0	0	0	0	0	0	0
PECR	0	0	0	0	0	0	0	0	0	0	0	0	2.86	0	0	0	0	0	0	0	0	0	0	0	0	0	0	0	0	0	0	0	0	0	0	0	0	0	0	0	0	0	0	0	0	0	0	0	0
LOC645967	0	0	0	0	0	0	0	0	0	0	0	0	0	0	0	0	0	0	0	0	0	0	0	0	0	0	0	0	0	0	0	0	0	0	5.13	0	0	0	0	0	0	0	0	0	0	0	0	0	0
ENST00000387342.1	0	0	0	0	0	0	0	0	0	0	0	0	0	2.3	0	0	0	0	0	0	0	0	0	0	0	0	0	0	0	0	0	0	2.59	0	2.56	0	0	0	0	0	0	0	0	0	0	0	0	0	0
LOC100133985	1.75	0	0	0	0	0	0	0	0	0	0	0	0	0	0	2.53	0	0	0	0	0	0	0	0	0	0	0	0	0	0	0	0	0	0	0	0	0	0	0	0	0	0	0	0	3.23	0	0	0	0
NDUFA6-AS1	0	0	3.29	0	1.86	0	0	0	0	0	0	0	0	0	0	2.53	0	0	0	0	0	0	0	0	0	0	0	0	0	0	0	0	0	0	0	0	0	0	0	0	0	0	0	0	0	0	0	0	0
LOC646214	0	0	0	0	0	0	1.88	0	0	0	0	0	0	0	0	0	0	0	0	3.86	0	0	0	0	0	0	0	0	0	0	0	0	0	0	2.56	0	0	0	0	0	0	0	0	0	0	0	0	0	0
LOC100506497	0	0	0	0	0	0	0	0	0	0	0	0	0	0	0	2.53	0	0	0	0	0	0	0	0	0	0	0	0	0	0	0	0	2.59	0	0	0	0	0	0	0	0	0	0	0	0	0	0	0	0
LOC389765	0	0	0	0	0	0	0	0	0	0	0	0	0	0	0	0	0	0	3.37	0	0	0	0	0	0	0	0	0	0	1.81	0	0	0	3.88	0	0	0	0	0	0	0	0	0	0	0	0	0	0	0
FLVCR1-AS1	0	0	0	0	0	0	0	0	0	0	0	0	0	0	0	0	0	0	0	0	0	0	0	0	0	0	0	0	0	9.06	0	0	0	0	0	0	0	0	0	0	0	0	0	0	0	0	0	0	0
BMF	0	0	0	0	0	0	0	0	0	0	0	0	0	0	0	0	0	0	0	0	0	0	0	0	0	0	0	0	0	0	0	0	0	0	0	0	3.07	0	0	0	0	0	0	0	0	0	0	0	0
MEIS1	0	0	0	0	0	0	0	0	0	0	1.13	0	0	0	0	2.53	0	0	3.37	0	0	0	0	0	0	0	0	0	0	0	0	0	0	0	0	0	0	2.57	0	0	0	0	0	0	0	0	0	0	0
LOC101929504	0	0	0	0	0	0	0	0	0	0	0	0	0	0	0	0	0	0	3.37	0	0	0	0	0	0	0	0	0	0	0	0	3.4	0	1.94	0	0	0	0	0	0	0	0	0	0	0	0	0	0	0
LINC00462	0	0	0	0	0	0	0	0	0	0	0	0	0	0	0	0	0	0	6.74	0	0	0	0	0	0	0	0	0	0	3.62	0	0	0	0	0	0	0	0	0	0	0	0	0	0	0	0	0	0	0
PROCA1	0	0	0	0	0	2.5	0	0	0	0	0	0	0	0	0	0	0	0	0	0	0	0	0	0	0	0	0	0	0	0	0	0	0	1.94	0	0	0	0	0	0	0	0	0	0	0	0	0	0	0
STAT5A	0	0	0	0	0	0	0	0	0	0	0	0	0	6.91	0	0	0	0	0	3.86	0	0	0	0	0	0	0	0	0	0	0	0	0	0	0	0	0	0	0	0	0	0	0	0	0	0	0	0	0
KPNA7	0.87	0	0	0	0	0	0	0	0	0	0	0	0	0	0	2.53	0	0	0	0	0	0	0	0	0	0	0	0	0	0	0	0	0	0	0	0	3.07	0	0	0	0	0	0	0	0	0	0	0	0
LINC00305	6.11	0	0	0	0	0	0	0	0	0	0	0	0	0	0	0	0	0	0	0	0	0	0	0	0	0	0	0	0	0	0	0	0	0	0	0	0	0	0	0	0	0	0	0	0	0	0	0	0
NOXO1	0	0	1.64	0	0	0	0	0	0	0	0	0	0	0	0	0	0	0	3.37	3.86	0	0	0	0	0	2.4	0	0	0	0	0	0	0	0	0	0	0	0	0	0	0	0	0	0	0	0	0	0	0
C6orf99	0	2.65	0	0	0	0	0	0	0	0	0	0	0	0	0	5.06	0	0	0	0	0	0	0	0	0	0	0	0	0	1.81	0	0	2.59	0	0	0	0	0	0	0	0	0	0	0	0	0	0	0	0
C1orf226	0	0	4.93	0	0	0	1.88	0	0	0	0	0	0	0	0	0	0	0	0	0	0	0	0	0	0	0	0	0	0	3.62	0	0	0	0	0	0	0	0	0	0	0	0	0	0	0	0	0	0	0
TMC8	0	0	0	0	0	0	0	0	0	0	0	0	0	0	0	2.53	0	0	0	0	0	0	0	0	0	0	0	0	0	0	0	0	0	0	0	0	3.07	2.57	0	0	0	0	0	4.24	0	0	0	0	0
GPR22	0	0	0	0	0	0	0	1.21	0	0	0	0	0	0	0	5.06	0	0	0	0	0	0	0	0	2.4	0	0	0	0	1.81	0	0	0	1.94	0	0	0	0	0	0	0	0	0	0	0	0	0	0	0
VSIG2	0	0	0	0	0	0	0	0	0	0	0	0	0	0	0	0	0	0	0	0	0	0	2.73	0	0	0	0	0	0	0	0	3.4	0	0	0	0	0	0	0	0	0	0	0	0	0	0	0	0	0
VLDLR-AS1	0	0	0	0	0	0	0	0	0	0	0	0	0	0	0	0	0	0	0	0	0	0	0	0	0	0	9.19	0	0	0	0	3.4	0	0	0	0	0	0	0	0	0	0	0	0	0	0	0	0	0
E2F2	0	0	0	0	0	0	0	0	0	0	0	0	0	0	0	0	0	0	0	0	0	1.91	0	0	0	0	0	0	0	0	0	0	2.59	0	0	0	0	0	0	0	0	0	0	0	6.47	0	0	0	0
POU6F2-AS2	0	0	0	0	0	0	0	0	0	0	0	0	0	0	0	0	0	0	0	0	0	0	0	0	0	0	0	0	0	0	0	0	0	1.94	7.69	0	0	0	0	0	0	0	0	0	0	0	0	0	0
TTC30B	0	0	0	0	0	0	0	0	0	0	0	0	0	0	0	5.06	0	0	0	0	0	0	0	0	0	0	0	0	0	0	0	0	0	3.88	0	0	0	0	0	0	0	0	0	0	0	2.42	0	0	0
WDR35	0	0	0	0	0	0	0	0	0	0	0	0	0	0	0	0	0	0	0	0	0	0	0	0	0	0	0	0	0	0	0	0	0	11.64	0	0	0	0	0	0	0	0	0	0	0	0	0	0	0
C19orf67	0	0	4.93	0	0	0	0	0	0	0	0	0	0	0	0	0	0	0	3.37	0	0	0	0	0	0	0	0	0	0	0	0	0	0	0	0	0	0	0	0	0	0	0	0	0	0	0	0	0	0
TCFL5	1.75	0	0	0	0	0	0	0	0	0	0	0	0	0	0	5.06	0	0	0	0	0	0	0	0	0	0	0	0	0	0	0	0	2.59	3.88	0	0	0	0	0	0	0	0	0	0	0	0	0	0	0
ITGB5	0	0	0	0	0	0	0	4.83	0	0	0	0	0	0	0	5.06	0	0	3.37	0	0	0	0	0	0	0	0	0	0	0	0	0	0	0	0	0	0	0	0	0	0	0	0	0	0	0	0	0	0
ID2-AS1	5.24	0	0	0	0	0	0	0	0	0	1.13	0	0	0	0	0	0	0	3.37	3.86	0	0	0	0	0	2.4	0	0	0	0	0	0	0	0	0	0	0	0	0	0	0	0	0	0	0	0	0	0	0
NIPBL-AS1	0	0	0	0	0	0	0	0	0	0	0	0	0	0	0	0	0	0	0	0	0	0	0	0	0	0	0	0	0	0	0	0	0	0	0	0	3.07	0	0	0	5.91	3.81	0	0	0	0	0	0	0
LOC101929595	0	0	1.64	0	0	0	0	0	0	0	0	0	0	2.3	0	0	0	0	0	0	0	0	0	0	0	2.4	0	0	0	1.81	0	0	0	3.88	5.13	0	0	0	0	0	0	0	0	0	0	0	0	0	0
LOC105376736	3.49	0	0	0	0	0	0	0	0	0	0	0	0	0	0	0	0	0	0	0	0	0	0	0	0	0	0	0	0	0	0	0	0	0	2.56	0	0	0	0	0	0	0	0	0	0	0	0	0	0
TTC21A	0	0	0	0	0	0	0	0	0	0	0	0	0	0	9.39	0	0	0	6.74	0	0	0	0	0	0	0	0	0	0	0	0	0	0	1.94	0	0	0	0	0	0	0	0	0	0	0	0	0	0	0
OCLN	5.24	0	1.64	0	0	2.5	0	0	0	0	0	0	0	0	0	0	0	0	0	0	0	0	0	0	0	0	3.06	0	0	0	0	3.4	2.59	0	0	0	0	0	0	0	0	0	0	0	0	0	0	0	0
RNF223	0	0	0	0	0	0	0	2.41	0	0	0	0	0	0	4.7	0	0	0	0	0	0	0	0	0	2.4	0	0	0	0	1.81	0	0	0	0	0	0	0	0	0	0	0	0	0	0	0	0	0	0	0
CAGE1	0	0	0	0	1.86	0	0	0	0	0	0	0	0	0	0	15.17	0	0	0	0	0	0	0	0	0	0	0	0	0	1.81	0	0	0	0	0	0	0	0	0	0	0	0	0	0	0	0	0	0	0
CLUHP3	0	2.65	0	0	0	0	0	0	0	0	0	0	0	0	0	0	0	0	0	0	0	0	0	0	0	0	0	0	0	0	0	0	0	0	0	0	0	0	0	0	14.78	0	0	0	0	0	0	0	0
BAIAP2-AS1	1.75	0	0	0	0	0	0	0	0	0	0	0	0	0	4.7	0	0	0	6.74	0	0	0	0	0	0	0	0	0	0	0	0	0	2.59	0	0	0	0	0	0	0	0	0	0	0	0	0	0	0	0
MAP1LC3C	0	0	3.29	0	3.72	2.5	0	0	0	0	0	0	0	0	0	0	0	0	0	0	0	0	0	0	0	0	0	0	0	0	0	0	0	0	0	3.83	0	0	0	0	0	0	0	0	0	0	0	6.85	0
DGCR11	0	0	0	0	0	0	0	0	0	0	0	0	0	0	0	0	0	0	3.37	7.73	0	0	0	0	0	0	0	0	0	0	0	3.4	0	0	2.56	3.83	0	0	0	0	0	0	0	0	0	0	0	0	0
BFSP1	0	0	0	0	0	0	7.51	0	0	3.85	0	0	0	0	0	0	0	0	0	0	0	0	0	0	0	0	0	0	0	0	0	3.4	2.59	3.88	0	0	0	0	0	0	0	0	0	0	0	0	0	0	0
LOC728613	4.37	0	0	0	0	0	0	1.21	0	0	0	0	0	0	0	10.11	0	0	0	0	0	0	0	0	0	0	0	0	0	0	0	0	0	3.88	0	0	0	0	0	0	0	0	0	0	0	0	0	0	0
MFSD13B	0	0	0	0	9.31	0	0	0	0	0	0	0	0	0	0	0	0	0	0	0	0	0	0	0	0	0	0	0	0	3.62	0	0	0	3.88	5.13	0	0	0	0	0	0	0	0	0	0	0	0	0	0
KCNS1	0	0	0	0	0	0	0	0	0	0	0	0	0	0	9.39	0	0	0	3.37	0	0	0	0	0	0	0	0	0	0	3.62	0	0	0	3.88	0	0	0	0	0	0	0	0	0	0	0	0	0	0	0
C3orf62	0	0	0	0	0	0	0	0	0	0	0	0	0	0	0	0	0	0	10.11	0	0	0	0	0	0	0	0	0	0	1.81	0	0	2.59	5.82	0	0	0	0	0	0	0	0	0	0	0	0	0	0	0
CCDC28B	6.11	0	0	0	0	0	0	0	0	0	4.53	0	0	0	0	2.53	0	0	0	0	0	0	0	0	0	0	0	0	0	3.62	0	0	0	0	0	0	0	0	0	0	0	0	0	0	0	0	0	0	0
WDR27	0	0	0	0	3.72	0	0	3.62	0	0	0	0	0	0	0	0	0	7.85	3.37	0	0	0	0	0	0	0	0	0	0	1.81	0	0	0	1.94	0	0	0	0	0	0	0	0	0	0	0	0	0	0	0
SLC9C1	0	0	0	0	0	0	0	0	0	0	0	0	0	0	0	0	0	0	0	0	0	0	0	0	0	0	0	0	0	0	0	0	0	7.76	0	0	15.36	0	0	0	0	0	0	0	0	0	0	0	0
PTTG1	4.37	0	0	0	0	0	0	2.41	0	0	0	0	0	2.3	0	2.53	0	0	0	0	0	0	0	0	0	0	0	0	0	0	0	0	0	7.76	0	0	0	0	0	0	0	0	0	0	0	0	0	0	0
A2ML1	5.24	0	0	0	0	0	0	0	0	0	0	0	0	0	4.7	0	0	0	0	1.29	0	1.91	0	0	0	0	0	0	0	1.81	0	0	0	3.88	0	0	0	0	0	0	0	0	0	0	0	0	0	0	0
FAM153C	0	0	0	0	0	0	0	0	0	0	0	0	0	0	0	2.53	0	11.78	6.74	0	0	0	0	0	0	0	0	0	0	0	0	0	0	0	0	0	0	0	0	0	0	0	0	0	0	0	0	0	0
PER1	0	0	4.93	0	0	0	0	3.62	0	0	5.67	0	0	0	0	2.53	0	0	3.37	1.29	0	0	0	0	0	0	0	0	0	1.81	0	0	2.59	0	0	0	0	0	0	0	0	0	0	0	0	0	0	0	0
CHST2	3.49	0	0	0	1.86	0	0	0	0	0	0	0	0	0	0	0	0	0	3.37	0	0	9.56	0	0	0	0	0	0	0	0	0	0	0	5.82	0	0	0	0	0	0	0	0	0	0	0	0	0	0	0
SLC1A1	1.75	0	0	0	0	0	0	0	0	0	1.13	0	0	0	0	0	0	0	6.74	0	0	0	0	0	0	0	0	0	0	0	0	0	2.59	0	0	0	0	0	0	0	0	0	0	0	0	0	0	0	0
ZNF818P	2.62	0	3.29	0	0	0	0	0	0	0	0	0	2.86	2.3	0	0	0	0	0	0	0	0	0	0	0	0	0	0	0	0	0	0	0	0	0	0	0	0	0	0	0	0	0	0	0	0	0	0	3.5
AARD	0.87	0	0	0	0	0	0	0	0	0	0	0	0	0	0	2.53	0	0	0	0	0	0	0	0	0	0	0	0	0	0	0	0	0	0	0	0	0	0	0	0	0	0	22.85	0	0	0	0	0	0
SYCE3	2.62	0	8.22	0	3.72	0	0	0	0	0	7.93	0	0	0	0	0	0	0	0	0	0	0	0	4.04	0	0	0	0	0	0	0	0	0	0	0	0	0	0	0	0	0	0	0	0	0	0	0	0	0
EML1	1.75	0	1.64	0	0	0	0	0	0	0	1.13	9.43	0	0	9.39	0	0	0	0	0	0	0	0	0	0	0	0	0	0	0	0	0	5.18	0	0	0	0	0	0	0	0	0	0	0	0	0	0	0	0
ATP6V1C2	0	10.6	0	0	0	0	0	2.41	0	0	0	0	0	0	0	7.58	0	0	0	0	0	0	0	0	0	0	0	0	0	1.81	0	0	0	0	0	0	0	0	0	0	0	0	0	0	0	0	0	0	0
ATP6AP1L	0	2.65	0	0	0	0	0	0	0	0	0	0	0	0	0	0	0	3.93	0	0	0	0	0	0	7.21	0	0	0	0	0	0	0	0	5.82	0	0	0	0	0	0	5.91	0	0	0	0	0	0	0	0
LOC101927257	0	0	1.64	0	0	0	0	0	0	0	0	0	0	0	0	0	0	0	3.37	0	0	0	0	0	0	0	0	0	0	7.25	0	0	0	7.76	2.56	0	0	0	0	0	0	0	0	0	0	0	0	0	0
PALM2	0	0	0	0	0	0	0	0	0	0	0	0	0	0	0	5.06	0	0	0	0	0	0	0	0	0	0	0	0	8.58	7.25	0	0	2.59	1.94	0	0	0	0	0	0	0	0	0	0	0	0	0	0	0
CYP2U1	0	0	1.64	0	0	0	0	0	0	0	1.13	0	0	2.3	0	5.06	0	0	0	0	0	0	0	0	0	0	0	0	0	1.81	0	0	2.59	7.76	0	0	0	0	0	0	5.91	0	0	0	0	0	0	0	0
DISP1	0	0	0	0	0	0	0	6.03	0	0	0	0	0	0	0	0	0	0	0	0	0	0	0	0	0	0	0	0	0	5.43	0	0	5.18	0	0	0	0	0	0	0	0	0	0	0	0	0	0	0	0
SSX2IP	0	0	0	0	18.61	0	0	0	0	0	2.27	0	5.71	0	0	0	0	0	0	0	0	0	0	0	0	0	0	0	0	0	0	0	0	1.94	0	0	0	0	0	0	0	0	0	0	0	0	0	0	0
SERPINB4	0	0	0	0	0	0	0	28.96	0	0	0	0	0	0	0	0	0	0	0	0	0	0	0	0	0	0	0	0	0	0	0	0	2.59	0	0	0	0	0	0	0	0	0	0	0	0	0	0	0	0
NAGS	0	0	0	0	0	0	0	0	0	0	0	0	0	0	9.39	2.53	0	0	0	0	0	0	0	0	4.8	0	3.06	0	0	0	0	3.4	0	0	0	0	0	0	0	0	0	0	0	0	0	0	0	0	0
TTC5	11.36	0	0	0	0	0	0	0	0	0	0	0	0	0	0	0	0	0	0	0	0	0	8.19	0	0	0	0	0	0	5.43	0	0	0	0	7.69	0	0	0	0	0	0	0	0	0	0	0	0	0	0
PGAM5	0	0	0	0	0	0	0	0	0	3.85	0	0	0	2.3	0	2.53	0	0	0	0	0	0	2.73	0	2.4	0	0	0	0	5.43	0	0	2.59	3.88	0	0	0	0	0	0	0	0	0	0	3.23	0	0	0	0
PRKG1	0	0	0	0	0	0	0	0	0	0	0	0	0	2.3	0	2.53	0	0	0	6.44	0	0	0	4.04	0	7.21	0	0	0	3.62	0	0	2.59	0	0	0	0	0	0	0	0	0	0	0	0	0	0	0	0
PLEKHH3	0	2.65	0	0	0	0	0	0	0	0	0	0	0	0	0	0	0	0	6.74	0	0	7.65	0	0	0	0	0	0	0	3.62	0	6.8	5.18	0	0	0	0	0	0	0	0	0	0	0	0	0	0	0	0
CARD6	1.75	0	0	0	0	0	0	2.41	0	0	7.93	0	0	0	0	5.06	0	0	0	0	0	0	0	0	0	0	0	0	0	1.81	0	0	0	3.88	5.13	0	0	0	0	0	0	0	0	0	0	0	0	0	3.5
ZNF662	0	0	0	0	0	0	0	0	0	0	5.67	0	0	0	0	5.06	0	0	3.37	0	0	0	0	0	0	0	0	0	0	1.81	0	0	2.59	0	0	0	0	0	0	0	0	0	0	4.24	0	0	0	0	0
GPR18	4.37	0	0	0	0	0	0	0	0	0	0	0	0	0	0	0	0	0	0	0	0	0	0	0	0	0	0	0	0	3.62	0	0	0	3.88	0	0	0	7.72	0	0	0	0	0	0	0	0	16.44	0	0
LCMT2	0	0	0	0	0	0	0	4.83	0	0	0	0	0	0	0	12.64	0	0	0	0	0	0	0	0	0	0	0	0	0	0	0	0	5.18	3.88	0	0	0	0	0	0	0	0	0	0	6.47	0	0	0	0
CHAF1A	0	0	0	0	5.58	0	0	0	0	0	0	0	0	11.51	0	0	0	0	3.37	0	0	0	5.46	0	0	0	0	0	0	7.25	0	0	2.59	1.94	0	0	0	0	0	0	0	0	0	0	0	0	0	0	0
MARK1	0	0	0	0	0	0	13.14	0	0	0	2.27	0	0	0	4.7	2.53	0	0	0	0	0	0	0	0	0	0	3.06	0	0	10.87	0	0	0	1.94	0	0	0	0	0	0	0	0	0	0	0	0	0	0	0
INSL3	5.24	0	0	0	0	0	0	0	0	0	0	0	0	0	9.39	0	0	0	6.74	0	0	0	0	0	0	0	0	0	8.58	0	0	0	2.59	0	0	0	0	0	0	0	0	0	0	0	0	0	0	0	0
PRKAR1B	0	5.3	0	0	0	0	0	0	0	0	0	0	0	0	4.7	0	0	0	0	0	0	0	8.19	0	0	0	0	0	0	0	0	0	0	0	0	0	0	0	0	0	11.82	0	0	0	0	0	0	0	0
LRCH4	4.37	0	0	0	0	0	0	0	0	0	0	0	0	0	4.7	0	0	0	3.37	0	0	0	0	0	0	0	0	0	0	0	0	0	0	3.88	0	0	0	0	0	0	14.78	0	0	0	0	0	0	0	0
LOC100505771	6.99	0	6.58	0	7.44	0	0	0	0	0	0	0	0	0	0	0	0	0	0	0	0	0	0	0	0	0	0	0	0	1.81	0	0	0	1.94	0	0	0	0	0	0	0	0	0	0	0	0	0	0	0
KRT33B	0	7.95	0	0	0	0	0	0	0	0	17	0	0	0	0	0	0	0	0	5.15	0	0	0	0	0	0	0	0	0	0	0	0	5.18	3.88	0	0	0	0	0	0	0	0	0	0	0	0	0	0	0
SH3BGRL2	0	0	0	0	0	0	0	0	0	0	0	0	8.57	0	0	0	0	0	0	0	0	0	0	0	0	7.21	0	0	0	0	0	0	0	3.88	2.56	0	0	0	0	0	0	19.05	0	0	0	0	0	0	0
FMO5	10.48	2.65	0	0	0	0	0	0	0	0	0	0	0	0	0	2.53	0	0	0	0	0	0	2.73	0	0	0	0	0	0	1.81	0	0	2.59	0	5.13	0	0	0	0	0	5.91	0	0	0	0	0	0	0	0
MIGA2	0	0	0	0	0	0	0	0	0	0	0	0	0	0	0	0	0	0	0	0	0	0	0	0	0	9.62	0	0	0	1.81	0	0	0	0	0	0	9.21	0	0	0	0	0	0	0	0	0	14.61	0	0
OVOL2	0.87	0	0	0	0	0	0	0	0	0	0	0	0	4.6	9.39	5.06	0	0	0	0	0	0	0	0	0	0	0	0	0	3.62	0	10.2	0	3.88	5.13	0	0	0	0	0	0	0	0	0	0	0	0	0	0
FAM175A	7.86	0	0	0	0	0	0	0	0	0	0	0	0	0	0	2.53	0	0	0	0	0	0	0	0	0	0	0	0	0	1.81	0	0	0	0	0	0	0	0	0	0	0	0	0	0	0	0	0	0	0
SLC35D1	0	0	0	0	0	0	0	0	0	0	0	0	0	0	9.39	7.58	0	0	6.74	3.86	0	0	0	0	0	0	0	0	0	0	0	0	7.77	1.94	2.56	0	0	0	0	0	0	0	0	0	0	0	0	0	0
ADGRG4	0	0	0	0	1.86	0	0	0	0	0	0	0	0	0	0	0	0	0	0	0	0	9.56	0	0	0	0	0	0	0	0	0	0	0	9.7	2.56	0	0	0	0	0	0	0	0	0	0	0	0	0	0
RASEF	3.49	2.65	0	0	1.86	0	11.26	0	0	0	1.13	9.43	0	0	0	0	0	0	0	0	0	0	0	0	0	0	0	0	0	1.81	0	0	0	0	2.56	0	0	0	0	0	0	0	0	0	0	0	0	0	0
MGC72080	0	0	8.22	0	0	0	0	0	0	0	0	0	0	0	0	0	0	0	0	0	0	0	0	0	0	0	0	0	0	3.62	0	0	0	1.94	0	0	0	5.15	0	0	0	15.24	0	0	0	0	0	0	0
LSS	0	0	1.64	0	3.72	0	0	0	0	0	0	0	0	0	0	0	0	0	0	0	0	0	0	0	0	0	0	0	0	3.62	0	0	2.59	1.94	0	0	0	0	0	0	2.96	0	0	0	0	2.42	0	0	0
ZSCAN16	0	0	0	0	0	0	0	0	0	0	9.07	0	8.57	0	4.7	0	0	0	0	0	0	0	0	0	0	0	0	0	0	5.43	0	0	2.59	0	0	0	0	0	0	0	0	0	0	0	0	0	0	0	0
CTSK	0	0	0	0	9.31	0	0	0	0	0	0	0	0	0	0	0	0	0	0	0	4.2	1.91	0	0	9.61	0	0	0	0	1.81	0	0	0	1.94	2.56	0	0	0	0	0	0	0	0	0	0	0	0	0	0
LOC285074	1.75	0	0	0	29.78	0	0	0	0	0	2.27	0	0	0	0	0	0	0	0	0	0	0	2.73	0	0	0	0	0	0	1.81	0	0	5.18	0	0	0	0	0	0	0	0	0	0	0	0	0	0	0	0
FAM83E	4.37	18.55	0	0	0	0	0	0	0	0	0	0	0	0	0	0	0	0	0	0	0	0	0	0	0	0	0	0	0	9.06	0	0	0	3.88	0	0	0	0	0	0	0	0	0	0	0	0	0	0	0
ZNF266	1.75	0	0	0	0	0	0	0	0	0	0	0	0	0	0	0	0	0	0	0	0	0	0	0	0	0	0	0	0	0	0	3.4	5.18	0	7.69	0	0	0	0	0	0	3.81	0	0	0	0	0	0	0
OPN3	5.24	0	0	0	0	0	0	0	0	0	1.13	0	0	0	0	0	0	7.85	0	0	0	0	0	0	0	0	0	0	0	18.11	0	3.4	2.59	3.88	0	0	0	0	0	0	0	0	0	0	0	0	0	0	0
ZNF230	0	0	0	0	0	0	0	0	0	0	3.4	0	0	0	9.39	0	0	0	0	3.86	0	0	0	0	0	0	6.13	0	0	9.06	0	0	0	1.94	2.56	0	0	0	0	0	0	0	0	0	0	0	0	0	0
KIAA1024	0	0	0	0	0	0	0	0	12.45	0	10.2	0	0	0	0	0	0	0	0	0	0	0	0	0	0	0	6.13	0	0	3.62	0	3.4	2.59	0	0	0	0	0	0	0	11.82	0	0	0	0	0	0	0	0
LONRF1	4.37	0	0	0	0	0	0	0	0	0	0	0	2.86	0	0	2.53	0	0	3.37	19.31	0	0	0	0	4.8	0	3.06	0	0	0	0	0	0	3.88	2.56	0	0	0	0	0	0	0	0	0	0	0	0	0	0
RPA4	0	0	0	0	0	0	0	0	0	0	6.8	0	11.42	0	0	0	0	0	6.74	0	0	0	24.56	0	0	0	0	0	0	0	0	0	0	0	0	0	0	0	0	0	0	0	0	0	0	0	0	0	0
FANCG	0	0	0	0	3.72	0	0	1.21	0	0	0	0	0	0	0	0	0	0	0	0	0	0	0	0	0	2.4	12.25	0	0	0	0	0	2.59	3.88	0	0	0	0	0	0	0	0	0	0	0	0	0	3.42	0
TSNARE1	0	5.3	0	0	0	0	3.75	3.62	0	0	0	0	0	0	0	0	0	0	0	0	0	0	0	0	0	2.4	0	0	0	0	0	0	5.18	0	0	0	0	0	0	0	0	0	0	4.24	0	0	0	0	0
MAPK7	0.87	0	1.64	0	1.86	0	0	1.21	0	0	2.27	0	0	0	4.7	2.53	0	3.93	3.37	0	0	0	0	4.04	0	7.21	0	0	0	1.81	0	0	0	0	0	0	3.07	0	0	0	0	7.62	0	0	0	0	0	0	3.5
ABLIM3	0	0	0	0	3.72	7.5	0	0	0	0	0	0	0	2.3	0	2.53	0	0	0	0	0	0	0	0	0	0	0	0	0	1.81	0	3.4	0	0	2.56	0	0	0	0	0	0	15.24	3.81	0	0	0	0	0	0
ANKRD36	2.62	0	0	0	0	2.5	0	0	0	0	1.13	0	0	4.6	0	0	0	0	3.37	0	0	0	0	0	0	0	0	0	0	5.43	0	3.4	0	13.58	2.56	0	0	0	0	0	2.96	0	0	0	0	0	0	0	0
TRPM4	7.86	0	0	0	0	0	1.88	0	0	0	4.53	0	0	0	0	0	0	0	3.37	0	0	0	0	0	0	0	0	0	0	7.25	0	3.4	0	3.88	2.56	0	0	0	0	0	14.78	0	0	0	0	0	0	0	0
STX2	0	0	0	0	9.31	0	0	0	0	0	10.2	0	0	0	4.7	2.53	0	0	6.74	0	0	0	0	0	0	0	0	0	0	9.06	0	0	0	9.7	0	0	0	0	0	0	0	0	0	0	0	0	0	0	0
B4GALT1-AS1	0	0	4.93	0	0	0	0	0	0	0	0	0	8.57	2.3	4.7	0	0	0	3.37	0	0	0	0	0	0	0	0	0	0	0	0	3.4	0	3.88	12.81	0	0	0	0	0	0	0	0	0	0	0	0	0	3.5
SLC18A2	0	0	0	0	0	0	5.63	0	0	0	7.93	0	14.28	2.3	0	0	0	0	0	0	0	0	0	0	0	0	0	0	0	1.81	0	6.8	2.59	5.82	0	7.67	0	0	0	0	0	0	0	0	0	0	0	0	0
CXorf67	9.61	0	0	0	9.31	0	0	0	0	0	0	0	0	0	0	0	0	0	0	0	0	0	0	0	0	0	0	0	0	0	0	0	0	0	0	0	0	0	0	0	0	0	0	0	0	0	0	0	21.01
PRC1	0.87	0	0	0	0	0	0	0	0	0	0	0	5.71	4.6	0	5.06	0	0	0	1.29	0	0	0	8.08	0	0	0	0	0	1.81	0	0	0	1.94	0	0	0	0	0	0	0	0	0	0	0	0	14.61	0	3.5
LOC105377348	4.37	0	9.87	0	13.03	0	0	0	0	0	0	0	0	0	0	5.06	0	0	3.37	0	0	0	0	0	0	0	0	0	0	0	0	0	0	0	0	0	0	0	0	0	2.96	0	0	0	3.23	0	0	0	0
PRR26	0	0	0	0	0	0	0	0	0	0	0	0	0	0	0	0	0	0	0	0	0	0	0	0	0	0	0	0	8.58	14.49	0	0	2.59	0	0	0	0	0	0	0	0	7.62	0	0	0	0	0	23.96	0
ANK3	3.49	0	0	0	0	7.5	0	2.41	0	0	0	0	0	6.91	0	2.53	0	0	0	6.44	0	0	0	12.11	12.01	0	0	0	0	0	0	0	0	3.88	0	0	0	0	0	0	0	0	0	0	0	0	0	0	0
CHMP3	0	0	0	0	0	0	0	0	0	3.85	0	0	0	0	0	2.53	0	0	3.37	0	0	0	0	0	9.61	0	0	0	0	3.62	0	6.8	0	1.94	5.13	0	0	0	0	0	0	0	0	0	0	0	0	0	0
ZNF174	4.37	15.9	1.64	0	0	0	0	0	0	0	0	0	0	0	4.7	0	0	0	3.37	0	0	5.74	0	0	0	0	0	0	0	5.43	0	0	0	9.7	5.13	0	3.07	0	0	0	0	0	0	0	0	0	1.83	0	0
CDH5	1.75	0	0	0	1.86	0	0	0	0	0	0	0	0	2.3	0	0	0	0	0	2.58	0	3.83	5.46	0	0	0	0	0	0	7.25	0	0	0	7.76	0	0	0	0	0	0	0	6.68	0	4.24	0	0	0	0	0
QPCTL	0	0	0	0	0	5	1.88	0	0	0	6.8	0	0	0	0	0	0	0	0	1.29	0	1.91	0	0	0	2.4	0	0	0	1.81	0	3.4	2.59	1.94	0	0	0	0	0	0	2.96	0	0	0	0	2.42	1.83	10.27	0
TCAM1P	0.87	0	0	0	1.86	0	5.63	0	0	0	0	18.87	0	18.41	0	0	0	0	0	0	0	0	0	0	0	0	0	0	0	0	0	0	0	1.94	0	0	0	2.57	0	0	0	0	0	0	0	0	0	0	0
SOAT2	0.87	7.95	14.8	0	3.72	0	0	20.51	0	0	0	0	0	0	0	0	0	0	0	0	0	0	13.64	0	0	0	0	0	0	0	0	0	0	0	2.56	0	0	0	0	0	0	0	0	0	0	0	0	0	0
FIZ1	0.87	0	0	0	0	0	0	0	0	0	0	0	0	0	0	7.58	0	0	0	1.29	0	0	0	0	33.63	0	0	0	0	7.25	0	6.8	0	1.94	0	0	0	0	0	0	0	0	0	0	0	0	0	3.42	0
CYBA	13.1	0	4.93	0	0	0	0	0	0	0	0	0	0	0	0	7.58	0	0	0	1.29	0	0	0	0	0	0	0	0	0	12.68	0	3.4	12.95	0	0	0	0	0	0	0	0	0	0	0	0	0	0	0	0
FIGNL1	9.61	0	0	0	1.86	0	0	0	0	0	0	0	0	0	0	5.06	0	0	3.37	0	4.2	3.83	2.73	0	0	0	0	0	0	3.62	0	0	0	3.88	2.56	0	0	0	0	0	0	0	0	0	12.94	0	5.48	0	0
TNFSF4	4.37	0	1.64	0	0	0	0	0	0	0	3.4	0	2.86	0	0	0	0	0	0	0	0	0	2.73	0	0	7.21	0	0	0	0	0	17	2.59	3.88	0	0	0	0	0	0	0	15.24	0	0	0	0	0	0	0
CTAGE9	0	0	0	0	0	5	0	0	0	0	4.53	0	5.71	0	4.7	2.53	0	0	3.37	0	0	0	0	0	0	0	0	0	0	0	0	0	20.71	5.82	0	0	0	0	0	0	0	0	0	0	0	0	0	0	0
ARHGAP35	8.73	0	1.64	0	0	7.5	0	13.27	0	0	0	0	0	0	0	5.06	0	0	0	0	0	0	0	0	0	2.4	0	0	0	5.43	0	0	7.77	0	2.56	0	0	0	0	0	0	3.81	0	0	0	0	0	0	0
BTN3A2	4.37	0	13.16	0	0	7.5	0	0	0	0	0	0	0	4.6	0	2.53	0	0	0	0	0	0	0	0	0	0	3.06	0	0	3.62	0	0	0	9.7	2.56	0	0	0	0	0	0	0	0	0	0	0	0	0	0
GATSL2	0	2.65	0	0	1.86	0	0	0	0	3.85	1.13	9.43	2.86	0	0	2.53	0	0	3.37	7.73	0	0	0	0	0	2.4	0	0	0	5.43	0	0	5.18	0	0	0	0	0	0	0	0	0	0	0	0	0	0	0	10.5
C14orf169	0	0	0	0	0	0	0	6.03	0	0	0	0	2.86	0	0	7.58	0	0	0	0	0	0	2.73	0	7.21	2.4	0	0	0	3.62	0	3.4	0	3.88	2.56	0	0	0	0	0	0	0	0	0	0	0	0	0	0
PHEX	0	0	11.51	0	0	0	0	8.45	0	0	0	0	0	0	0	0	0	3.93	3.37	1.29	0	0	0	0	4.8	0	0	0	0	10.87	0	0	2.59	13.58	5.13	0	0	0	0	0	0	0	0	0	0	0	0	0	0
GINS3	2.62	2.65	3.29	0	0	0	0	6.03	0	0	0	9.43	0	0	0	0	0	0	0	1.29	0	0	0	0	0	0	0	0	0	3.62	0	0	0	0	0	0	0	0	0	0	0	0	0	0	0	19.39	5.48	0	0
C21orf62-AS1	0	0	6.58	0	0	0	0	0	0	0	0	0	0	0	0	0	0	0	0	0	0	0	0	0	0	0	15.32	0	0	0	0	0	0	0	0	0	0	0	10.01	0	14.78	0	3.81	0	0	0	0	0	0
CCDC149	1.75	0	0	0	1.86	0	0	2.41	0	0	0	0	0	2.3	0	0	0	3.93	6.74	0	0	0	5.46	0	0	2.4	0	0	0	3.62	0	0	0	0	0	0	0	0	0	0	0	0	0	0	0	0	0	0	0
FIGN	0	0	0	0	0	0	0	20.51	0	0	0	0	0	0	0	2.53	0	7.85	0	0	0	0	0	0	0	0	0	0	8.58	3.62	0	0	0	0	5.13	0	0	0	0	0	0	0	0	0	0	9.69	0	0	0
TPT1-AS1	0	0	0	0	0	0	0	0	0	0	0	0	0	0	0	0	0	0	0	0	0	19.13	0	0	0	0	0	0	0	0	0	3.4	0	1.94	5.13	0	0	5.15	0	0	2.96	0	0	0	0	0	0	0	7
MAST2	0.87	0	8.22	0	5.58	0	0	0	0	3.85	0	0	0	0	0	12.64	0	0	0	3.86	0	1.91	10.91	0	0	0	0	0	0	7.25	0	0	2.59	0	2.56	0	0	0	0	0	0	0	0	0	0	0	0	0	0
TRIM8	0.87	0	0	0	0	0	1.88	0	0	11.56	0	9.43	2.86	0	0	0	0	0	0	3.86	0	0	0	0	0	0	0	0	0	3.62	0	0	2.59	7.76	7.69	0	0	0	0	0	2.96	0	0	0	0	0	1.83	0	0
DDT	4.37	0	0	0	1.86	7.5	1.88	1.21	0	0	4.53	0	0	6.91	0	2.53	0	0	0	0	0	7.65	0	0	0	0	0	0	0	0	0	3.4	2.59	0	5.13	0	0	0	0	0	0	0	0	0	0	0	7.31	0	3.5
C2CD2L	0	18.55	0	0	0	0	0	0	0	3.85	0	0	2.86	0	0	2.53	0	0	3.37	1.29	0	0	0	0	7.21	0	12.25	0	0	0	0	3.4	15.54	0	0	0	0	0	0	0	0	0	0	0	0	0	0	0	0
B3GNT5	0.87	0	0	0	3.72	0	0	2.41	0	0	0	0	0	0	4.7	0	0	7.85	0	0	0	7.65	0	0	0	0	0	0	0	0	0	0	0	0	0	0	0	0	0	4.99	0	0	0	0	0	4.85	7.31	0	3.5
PHYHIP	0.87	2.65	0	0	7.44	0	0	3.62	0	0	22.67	0	0	0	0	0	0	0	0	0	0	1.91	5.46	0	0	0	0	0	0	0	0	0	0	3.88	0	0	0	0	0	0	0	0	0	0	0	2.42	0	0	0
IVD	0.87	0	11.51	0	0	0	0	0	0	3.85	0	0	0	0	4.7	5.06	0	0	6.74	0	0	0	0	0	4.8	0	0	0	0	1.81	0	0	0	3.88	5.13	0	0	0	0	0	0	0	0	0	0	0	5.48	0	0
FCHSD1	2.62	5.3	0	0	5.58	0	1.88	0	0	0	1.13	0	2.86	0	4.7	2.53	0	0	0	5.15	0	3.83	0	0	0	0	0	0	0	1.81	0	3.4	2.59	0	0	3.83	3.07	0	0	0	0	0	0	0	3.23	0	0	0	0
RNF103-CHMP3	0	0	0	0	0	0	0	3.62	0	0	0	0	0	0	0	5.06	0	0	0	0	0	0	0	0	0	0	0	0	0	0	0	0	0	0	0	0	0	0	0	0	20.69	0	7.62	0	0	4.85	0	3.42	0
ZZEF1	0	0	0	0	0	7.5	0	0	0	0	1.13	0	2.86	0	4.7	12.64	0	0	3.37	0	0	0	2.73	0	0	0	0	0	0	1.81	0	0	18.12	3.88	2.56	0	0	0	0	0	0	0	0	0	0	0	0	0	0
CC2D1A	0	0	0	0	14.89	0	0	0	0	0	0	0	0	0	14.09	5.06	0	3.93	0	0	4.2	0	0	0	0	0	0	0	0	1.81	0	0	5.18	0	2.56	0	0	0	0	0	0	3.81	0	0	0	0	0	0	0
ERMAP	0	0	8.22	0	0	0	0	0	0	34.69	0	0	0	0	0	0	0	0	3.37	0	0	0	0	0	0	0	0	0	0	9.06	0	3.4	5.18	1.94	5.13	0	0	0	0	0	0	0	0	0	0	0	0	0	0
LOC101927752	0	7.95	13.16	0	0	0	0	0	24.9	0	0	0	0	0	0	0	0	7.85	0	0	0	0	0	0	0	0	0	0	0	1.81	0	3.4	5.18	5.82	0	0	0	0	0	0	0	0	0	0	0	0	0	0	0
SUSD6	0	0	3.29	0	0	0	0	0	0	0	6.8	0	0	0	0	7.58	0	0	0	9.01	0	0	0	0	0	0	0	0	0	5.43	0	10.2	0	5.82	0	0	0	0	0	0	11.82	3.81	0	0	3.23	0	0	0	0
RYR3	0	10.6	0	0	0	0	0	12.07	0	0	0	0	0	0	0	5.06	0	0	13.48	0	0	0	0	0	0	0	0	0	0	5.43	0	3.4	0	7.76	5.13	0	12.29	0	0	0	0	0	0	0	0	0	0	0	0
MAT2A	8.73	2.65	0	0	9.31	7.5	0	9.65	0	0	0	0	0	0	0	0	0	0	0	0	0	0	0	4.04	0	0	0	0	8.58	7.25	0	0	0	1.94	0	3.83	0	0	0	0	0	0	0	0	0	2.42	0	0	0
DNAJC11	0.87	5.3	0	0	7.44	0	0	1.21	0	0	3.4	0	0	0	0	10.11	0	0	0	0	0	1.91	0	8.08	2.4	2.4	3.06	0	0	0	0	3.4	2.59	3.88	5.13	0	0	0	0	0	0	0	0	0	0	0	0	0	0
ZMYND19	13.98	0	0	0	0	0	0	0	0	0	0	0	0	0	0	2.53	0	0	0	10.3	0	0	0	0	0	0	0	0	0	1.81	0	6.8	0	5.82	0	0	0	0	0	0	0	0	0	0	0	0	0	0	0
KIAA1551	10.48	0	0	0	7.44	0	0	0	0	0	0	0	0	2.3	0	7.58	0	0	3.37	0	0	1.91	0	0	21.62	0	0	0	0	5.43	0	0	2.59	3.88	2.56	0	0	0	0	0	0	0	0	0	0	0	3.65	0	0
TTL	0.87	0	0	0	0	0	0	7.24	0	0	0	0	0	0	4.7	0	0	0	0	0	0	3.83	0	0	0	2.4	3.06	0	0	3.62	0	3.4	2.59	1.94	2.56	0	0	0	0	0	17.74	0	0	0	0	0	0	0	0
JAZF1	0.87	0	1.64	0	0	0	0	0	0	0	0	0	2.86	16.11	0	0	0	0	0	0	0	0	24.56	0	4.8	0	3.06	0	0	1.81	0	0	2.59	5.82	0	0	0	0	0	0	2.96	0	0	0	0	0	0	0	3.5
KPTN	0	7.95	4.93	0	0	10.01	1.88	6.03	0	0	10.2	9.43	5.71	0	0	0	0	0	0	5.15	4.2	0	0	0	0	0	0	0	0	3.62	0	0	7.77	0	0	3.83	0	0	0	0	0	0	0	0	0	0	0	0	0
LMCD1	3.49	0	16.45	0	0	0	0	0	0	0	0	0	0	0	4.7	0	0	0	3.37	0	0	0	0	0	9.61	0	0	0	0	3.62	0	0	2.59	3.88	0	0	0	0	0	0	0	0	0	0	0	0	0	0	0
CASC8	0.87	0	1.64	0	0	0	0	10.86	0	0	14.73	0	0	0	0	0	0	0	0	0	0	0	0	4.04	0	0	0	0	0	0	0	0	0	9.7	7.69	0	0	0	0	0	0	0	0	0	0	0	0	0	0
RAB17	7.86	0	1.64	0	11.17	0	0	0	0	0	4.53	0	0	0	0	2.53	0	0	10.11	0	0	7.65	8.19	8.08	0	0	0	0	0	0	0	3.4	5.18	5.82	0	0	0	0	0	0	0	0	0	0	0	0	0	0	0
SH3BP1	8.73	0	0	0	5.58	0	0	0	0	0	0	18.87	0	0	0	2.53	0	0	0	2.58	0	0	0	12.11	2.4	0	3.06	0	0	0	0	0	5.18	5.82	0	0	3.07	0	0	0	0	0	0	0	0	0	0	0	0
PTCD2	2.62	0	0	0	0	0	0	0	0	0	0	0	0	0	0	0	0	0	0	1.29	0	0	10.91	0	0	0	0	0	0	0	0	3.4	0	3.88	7.69	0	0	0	0	24.93	0	0	0	0	0	0	0	0	0
GALNT10	0	0	3.29	0	7.44	0	0	1.21	0	0	9.07	0	0	0	0	0	0	0	20.22	7.73	0	1.91	0	0	0	0	0	0	0	0	0	0	2.59	0	0	0	0	0	5.01	0	0	0	0	0	0	0	16.44	0	0
ARHGAP44	6.11	10.6	0	0	0	10.01	0	0	0	0	13.6	0	0	0	0	0	0	0	0	0	0	0	0	0	7.21	0	0	0	0	9.06	0	0	2.59	13.58	0	0	0	0	10.01	0	0	0	0	0	0	0	0	0	0
NIPA1	0	7.95	0	0	9.31	0	0	0	0	19.27	0	0	0	0	0	0	0	0	3.37	0	12.6	0	0	0	0	0	0	0	0	0	0	3.4	2.59	3.88	0	0	18.43	0	0	0	0	0	0	0	0	0	0	0	0
PTPRG	0	0	1.64	0	0	7.5	11.26	0	0	0	0	0	5.71	0	4.7	2.53	0	3.93	3.37	0	0	1.91	0	0	0	0	0	0	0	0	0	0	5.18	0	0	0	0	0	0	0	0	0	0	0	0	0	1.83	0	0
RNF19B	6.99	0	0	0	0	0	0	3.62	0	0	3.4	0	8.57	0	0	5.06	0	0	0	0	0	0	0	0	0	0	0	0	0	5.43	0	3.4	2.59	9.7	0	0	0	0	0	0	0	0	0	0	6.47	0	0	0	0
ADAP2	0	5.3	0	0	0	0	0	0	0	0	22.67	0	0	0	0	0	0	3.93	0	0	0	11.48	46.38	0	0	0	0	0	0	0	0	0	0	1.94	0	0	0	0	0	0	0	0	0	0	0	0	0	0	0
BCL9	0.87	0	0	0	0	0	0	0	0	0	0	0	0	0	0	10.11	0	0	0	1.29	0	0	0	0	0	0	0	0	0	16.3	0	10.2	2.59	1.94	2.56	0	0	0	0	0	0	0	0	0	0	0	0	0	0
NTF4	4.37	0	0	0	0	0	0	0	0	0	4.53	0	0	2.3	9.39	0	0	0	0	14.16	0	0	16.37	0	0	0	0	0	0	0	0	0	0	0	7.69	0	0	25.74	0	0	0	0	0	0	0	0	0	0	0
TTLL12	4.37	0	0	0	0	2.5	0	0	0	0	0	9.43	0	0	0	0	0	0	3.37	1.29	0	3.83	0	0	0	0	0	0	0	7.25	0	6.8	5.18	3.88	0	0	0	0	0	0	0	0	0	0	0	0	7.31	0	0
NXPE3	6.99	0	0	0	0	0	0	0	0	0	0	0	0	0	14.09	5.06	0	0	0	0	8.4	0	0	0	0	0	0	0	0	5.43	0	0	10.36	0	5.13	0	0	0	0	0	0	3.81	0	8.49	0	0	0	0	0
LINC00882	0	0	0	0	1.86	0	0	0	0	0	13.6	0	2.86	0	0	0	0	0	3.37	0	0	3.83	0	0	0	2.4	0	0	0	3.62	0	3.4	5.18	0	0	0	0	0	0	0	29.56	0	0	4.24	0	0	0	0	0
PARP10	2.62	0	1.64	0	0	5	0	0	12.45	0	0	0	5.71	0	0	5.06	0	0	3.37	0	0	1.91	2.73	0	0	0	0	0	0	10.87	0	3.4	2.59	1.94	0	0	3.07	0	0	0	0	3.81	11.43	4.24	0	4.85	0	0	0
MADD	0	0	0	0	5.58	0	7.51	0	0	0	0	0	0	6.91	0	2.53	0	0	6.74	0	0	0	2.73	0	0	0	0	0	8.58	1.81	0	0	2.59	5.82	0	3.83	0	0	0	19.95	2.96	0	0	16.97	0	0	0	0	0
THNSL1	0	0	3.29	0	0	0	0	0	0	0	0	0	0	0	0	0	0	0	3.37	5.15	0	0	0	0	0	7.21	0	0	8.58	0	0	0	2.59	1.94	0	0	3.07	0	0	0	0	0	0	21.21	0	0	0	0	0
TMPRSS13	0	0	3.29	0	0	0	0	2.41	0	0	4.53	0	0	11.51	0	2.53	0	0	0	0	12.6	0	5.46	0	0	0	0	0	8.58	1.81	0	0	12.95	5.82	0	0	0	0	0	4.99	0	0	0	0	0	0	0	0	0
SLC27A3	6.11	0	0	0	0	0	1.88	0	0	0	0	0	5.71	0	0	2.53	0	0	6.74	9.01	0	0	0	12.11	0	0	0	0	0	10.87	0	0	2.59	3.88	0	3.83	3.07	0	0	0	0	0	0	0	0	0	0	0	0
SSPN	0	0	4.93	0	0	32.52	0	0	0	0	0	0	0	2.3	0	5.06	0	0	6.74	0	0	0	0	0	0	0	0	0	0	12.68	0	0	0	5.82	0	0	18.43	0	0	0	0	0	0	0	0	2.42	0	0	0
ATP8B1	0	0	0	0	0	0	0	0	0	15.42	3.4	0	0	6.91	4.7	5.06	0	0	3.37	0	0	0	0	8.08	0	0	0	0	0	12.68	0	0	10.36	5.82	2.56	0	0	0	0	0	0	0	3.81	0	0	2.42	0	0	0
LIN9	6.11	2.65	4.93	0	7.44	0	0	0	0	0	9.07	0	0	0	4.7	0	0	0	3.37	1.29	0	3.83	0	16.15	14.41	0	0	0	0	7.25	0	0	2.59	0	2.56	0	0	2.57	0	0	0	0	3.81	0	0	0	0	0	0
PIP5K1C	12.23	0	0	0	0	0	0	0	0	19.27	1.13	0	0	0	0	7.58	0	0	0	5.15	4.2	5.74	0	0	0	0	0	0	0	10.87	0	0	2.59	1.94	0	0	0	0	0	14.96	0	0	0	0	0	0	0	0	0
FKRP	0	0	6.58	0	1.86	0	0	0	0	3.85	4.53	0	5.71	13.81	9.39	0	0	0	6.74	5.15	0	5.74	0	0	0	0	0	0	0	1.81	0	0	2.59	5.82	2.56	0	0	0	0	0	0	0	0	0	0	14.54	0	0	0
GFPT2	0	0	0	0	0	0	0	0	0	0	0	0	0	0	9.39	7.58	0	0	13.48	1.29	0	0	8.19	20.19	0	0	6.13	0	0	1.81	0	6.8	2.59	5.82	2.56	0	0	0	0	0	0	0	0	0	12.94	0	0	0	0
N6AMT1	4.37	0	14.8	0	7.44	0	0	0	0	0	13.6	0	0	0	4.7	10.11	0	0	0	0	0	7.65	13.64	0	0	0	0	0	0	7.25	0	0	0	0	2.56	0	0	0	10.01	0	0	0	0	0	0	0	0	0	0
OTUD3	0	0	0	0	0	0	0	0	0	0	0	0	0	0	0	5.06	0	0	3.37	9.01	0	0	0	0	0	0	0	0	0	7.25	0	0	0	3.88	0	0	0	0	0	0	0	0	0	0	0	0	0	0	0
NFKBIL1	0	0	4.93	0	0	0	0	12.07	0	0	10.2	9.43	0	0	0	2.53	0	0	0	1.29	0	0	0	0	0	0	0	0	0	5.43	0	0	0	1.94	2.56	0	0	0	0	0	0	0	7.62	0	0	2.42	1.83	0	0
TRANK1	0.87	0	0	0	0	17.51	0	0	0	0	0	0	14.28	0	0	5.06	0	0	6.74	2.58	4.2	0	8.19	0	0	0	0	0	0	3.62	0	6.8	7.77	9.7	0	0	9.21	0	0	0	0	0	0	0	0	0	0	0	0
LOC101927851	0.87	26.49	0	0	0	0	0	0	0	0	0	0	0	0	9.39	0	0	3.93	0	10.3	0	0	0	0	0	0	0	0	0	0	0	6.8	0	0	0	0	0	12.87	0	0	0	0	0	0	0	7.27	0	0	0
ALYREF	5.24	2.65	1.64	0	0	2.5	0	0	0	0	0	0	0	0	4.7	0	0	7.85	3.37	1.29	0	0	0	0	0	12.02	0	0	0	7.25	0	0	12.95	1.94	10.25	0	0	0	0	0	0	0	0	0	3.23	0	0	0	7
U2AF2	3.49	5.3	0	0	0	0	11.26	0	0	0	0	0	5.71	0	0	2.53	0	0	6.74	1.29	0	0	0	0	0	0	0	0	0	1.81	0	6.8	10.36	1.94	7.69	0	0	0	0	0	0	0	0	4.24	3.23	2.42	0	0	3.5
ZNF529	2.62	2.65	1.64	0	9.31	0	9.38	0	0	0	2.27	0	2.86	0	0	7.58	0	0	3.37	0	0	0	0	0	0	0	21.45	0	0	10.87	0	0	0	3.88	5.13	3.83	0	0	0	0	0	11.43	0	0	0	0	1.83	0	0
SRXN1	0	0	6.58	0	0	0	0	0	0	0	0	18.87	0	0	0	2.53	0	3.93	0	0	0	0	0	20.19	0	12.02	0	0	0	9.06	0	0	23.3	0	2.56	0	0	0	0	0	0	0	7.62	0	0	0	0	0	0
TRAPPC10	0.87	0	9.87	0	5.58	0	1.88	0	0	0	1.13	0	2.86	0	9.39	5.06	0	0	0	0	0	0	0	4.04	0	0	0	0	0	12.68	0	6.8	5.18	17.46	2.56	0	0	0	0	0	0	0	0	0	12.94	0	0	0	0
NSUN3	0	0	0	0	0	2.5	16.89	0	0	0	0	9.43	0	0	0	5.06	0	0	0	0	12.6	0	0	0	16.81	0	0	0	0	0	0	0	0	0	2.56	0	0	0	0	0	0	0	0	0	0	0	12.79	0	0
IQCH-AS1	0.87	0	3.29	0	0	2.5	0	2.41	0	34.69	0	0	0	0	9.39	2.53	0	0	0	1.29	8.4	0	0	0	0	0	0	0	0	3.62	0	0	2.59	0	10.25	0	0	2.57	0	0	2.96	15.24	0	0	0	0	0	0	0
MBTD1	5.24	21.19	6.58	0	0	0	5.63	0	0	0	0	0	0	0	9.39	2.53	0	0	3.37	0	0	0	0	0	0	0	0	0	0	10.87	0	3.4	7.77	17.46	2.56	0	0	0	0	0	0	0	0	0	0	0	0	0	0
LOC100190986	2.62	0	6.58	0	0	10.01	0	6.03	0	0	0	0	0	9.21	0	7.58	0	0	13.48	0	0	1.91	2.73	0	0	0	0	0	0	14.49	0	6.8	0	1.94	2.56	0	0	0	0	0	0	0	0	0	0	0	0	13.69	0
PPP1R36	0	18.55	11.51	0	0	0	0	0	0	0	0	0	0	0	0	7.58	0	0	0	0	0	0	0	0	0	0	0	0	0	0	0	3.4	2.59	5.82	2.56	0	0	0	0	0	23.65	0	0	0	0	0	0	0	0
ZC3H3	5.24	0	0	0	0	0	0	1.21	0	7.71	0	0	0	0	0	2.53	0	0	3.37	0	0	1.91	2.73	0	0	4.81	9.19	0	8.58	3.62	0	6.8	5.18	11.64	0	0	0	0	0	0	0	0	0	0	0	0	3.65	6.85	0
CD36	5.24	0	6.58	0	7.44	0	0	0	0	0	3.4	0	0	0	4.7	5.06	0	0	16.85	0	0	0	0	0	0	2.4	0	0	0	14.49	0	6.8	7.77	5.82	5.13	0	0	0	0	4.99	0	0	0	0	0	0	0	0	0
CASD1	8.73	13.25	3.29	0	0	12.51	0	0	0	0	0	0	0	4.6	9.39	10.11	0	0	6.74	0	0	0	0	12.11	0	0	0	0	0	14.49	0	6.8	0	1.94	5.13	0	0	0	0	0	0	0	3.81	0	0	0	0	0	3.5
SNTB1	3.49	0	0	0	1.86	0	0	1.21	0	0	10.2	0	0	0	0	0	0	0	10.11	0	29.4	0	0	0	0	0	6.13	0	0	16.3	0	0	0	13.58	0	0	9.21	0	0	0	0	0	0	0	0	0	12.79	0	0
GEMIN5	2.62	0	0	0	1.86	0	0	3.62	0	0	10.2	0	0	0	0	5.06	0	0	0	1.29	0	1.91	0	4.04	0	0	0	0	0	10.87	0	0	5.18	0	0	0	0	0	25.03	14.96	0	0	0	0	0	0	0	0	0
CRTC2	0	0	3.29	0	1.86	0	0	6.03	0	3.85	0	0	0	0	4.7	0	0	0	6.74	0	0	0	10.91	0	0	7.21	0	0	0	3.62	0	3.4	0	0	0	0	0	0	0	0	0	3.81	26.66	0	0	0	0	3.42	0
SERPINI1	2.62	10.6	3.29	0	0	0	7.51	2.41	0	0	0	0	0	0	0	0	0	0	16.85	0	0	0	0	0	12.01	0	0	0	0	0	0	6.8	5.18	0	2.56	0	0	0	0	0	0	0	0	0	0	0	0	0	0
FAM95C	0	0	1.64	0	0	7.5	1.88	0	0	0	0	0	0	0	0	7.58	0	3.93	0	1.29	0	11.48	0	0	0	2.4	0	0	8.58	7.25	0	0	2.59	3.88	2.56	3.83	0	0	0	0	2.96	11.43	0	0	0	2.42	0	0	0
ALMS1	1.75	0	0	0	0	0	1.88	0	0	0	10.2	9.43	0	0	9.39	2.53	0	0	10.11	0	0	0	21.83	4.04	0	0	3.06	0	0	3.62	0	0	0	3.88	5.13	0	3.07	0	0	0	0	0	0	0	9.7	0	0	0	0
LOC100996255	0	0	3.29	0	5.58	2.5	0	4.83	0	0	7.93	0	34.27	0	0	10.11	0	0	6.74	0	12.6	0	0	0	0	4.81	0	0	0	7.25	0	0	0	0	5.13	0	0	10.29	0	0	0	0	0	0	0	0	0	0	0
ZSCAN25	0	0	11.51	0	0	0	0	10.86	0	0	18.13	0	0	0	14.09	0	0	0	3.37	0	0	0	5.46	20.19	0	0	0	0	0	1.81	0	0	2.59	0	0	0	0	0	0	0	0	0	0	0	0	0	0	0	0
MEN1	0.87	7.95	0	0	0	12.51	0	0	0	0	2.27	0	0	4.6	4.7	5.06	0	0	0	0	0	17.21	0	0	0	0	0	0	0	0	0	0	2.59	3.88	2.56	0	0	0	0	0	0	0	0	0	0	0	0	0	0
ENPP5	6.99	0	0	0	14.89	0	0	6.03	0	0	3.4	0	0	0	0	2.53	0	0	0	0	0	0	0	0	0	0	0	0	0	0	0	0	0	15.52	5.13	0	0	0	0	0	0	0	0	0	0	0	0	0	0
MLYCD	2.62	0	0	0	0	0	0	0	0	3.85	1.13	0	0	0	0	12.64	0	31.41	6.74	0	0	0	0	0	0	0	3.06	0	0	1.81	0	6.8	7.77	7.76	5.13	0	0	0	0	0	0	0	0	0	0	0	0	17.12	0
WASF1	0	2.65	1.64	0	0	0	0	0	0	0	0	0	0	0	0	15.17	0	3.93	0	0	0	3.83	8.19	0	0	0	3.06	0	0	0	0	0	2.59	7.76	5.13	0	0	0	5.01	0	0	0	0	0	0	21.81	0	0	0
NT5DC3	2.62	0	6.58	0	0	0	0	0	0	0	0	9.43	5.71	9.21	0	5.06	0	0	20.22	21.89	0	0	0	0	0	0	0	0	0	10.87	0	0	0	3.88	2.56	0	0	0	0	0	0	0	15.23	0	0	0	0	0	0
ZNF580	3.49	0	6.58	0	9.31	0	0	0	0	3.85	0	0	0	0	4.7	2.53	0	0	3.37	3.86	0	0	16.37	0	0	2.4	0	0	0	5.43	0	6.8	0	5.82	0	0	0	0	0	4.99	0	0	0	0	0	0	0	0	0
UTRN	0	5.3	3.29	0	0	0	0	4.83	0	0	0	0	5.71	0	4.7	0	0	0	23.59	0	0	9.56	0	12.11	0	0	0	0	0	0	0	0	2.59	5.82	7.69	0	0	7.72	0	0	20.69	0	0	0	0	0	0	0	0
UBTD1	0	0	6.58	0	1.86	0	0	0	0	0	6.8	0	2.86	0	0	0	0	0	3.37	2.58	21	0	0	0	24.02	0	0	0	0	0	0	3.4	2.59	5.82	7.69	0	0	0	0	0	0	0	0	0	0	0	12.79	0	0
KLRG2	0.87	0	0	0	0	0	3.75	0	0	0	0	0	0	0	4.7	5.06	0	0	10.11	5.15	0	0	0	0	0	0	18.38	0	0	9.06	0	0	2.59	5.82	0	0	0	0	0	0	0	0	19.04	0	0	4.85	0	0	0
IKBKB	8.73	0	0	0	0	0	0	0	0	0	0	0	0	0	0	0	0	0	0	24.47	0	0	0	16.15	0	0	0	0	0	7.25	0	0	7.77	0	5.13	0	6.14	0	0	0	0	0	0	0	0	0	1.83	0	0
IFT80	0	0	0	0	11.17	0	0	0	0	3.85	5.67	0	0	0	9.39	2.53	0	0	20.22	0	0	9.56	0	0	0	0	0	0	17.15	3.62	0	0	5.18	5.82	0	0	0	0	15.02	0	0	0	0	0	0	4.85	0	0	0
UBA6-AS1	2.62	18.55	0	0	9.31	0	0	1.21	0	0	0	0	0	4.6	0	2.53	0	0	0	6.44	0	3.83	0	0	0	0	0	0	0	0	0	0	2.59	3.88	0	0	3.07	0	0	0	0	19.05	0	0	0	0	23.75	0	0
C1orf74	0.87	0	0	0	9.31	12.51	0	4.83	0	0	0	0	11.42	2.3	0	2.53	0	0	6.74	0	0	0	0	0	0	0	0	0	8.58	3.62	0	6.8	5.18	3.88	5.13	0	0	0	0	0	0	0	0	0	0	0	18.27	0	0
CTNNBIP1	5.24	0	4.93	0	0	0	0	12.07	12.45	0	0	0	0	0	4.7	2.53	0	0	6.74	0	0	0	10.91	16.15	0	0	12.25	0	0	5.43	0	0	10.36	5.82	0	0	0	0	0	0	0	0	0	0	0	0	0	0	0
TMEM231	0	2.65	0	0	0	15.01	0	0	0	0	1.13	0	2.86	0	4.7	0	0	11.78	20.22	1.29	8.4	1.91	0	0	0	0	0	0	0	0	0	6.8	0	1.94	5.13	0	0	0	0	0	20.69	0	0	0	0	19.39	0	0	0
LZTR1	0	0	3.29	0	3.72	0	0	0	0	0	0	0	0	0	4.7	7.58	0	0	16.85	1.29	0	0	32.74	0	0	0	0	0	0	1.81	0	3.4	7.77	5.82	2.56	0	0	0	0	0	0	0	0	0	3.23	0	0	0	0
VSTM2L	0	2.65	1.64	0	0	0	30.03	1.21	0	0	0	0	0	0	14.09	2.53	0	11.78	0	16.74	0	7.65	0	0	2.4	0	0	0	0	0	0	0	10.36	1.94	0	0	0	0	0	0	0	0	0	0	0	0	0	0	0
ADO	9.61	0	0	0	0	0	0	0	0	0	0	37.74	0	0	4.7	2.53	0	0	10.11	0	0	1.91	0	0	0	0	0	0	0	5.43	0	3.4	12.95	1.94	0	0	0	0	0	4.99	0	0	0	0	0	19.39	0	0	0
CRB3	0	0	0	0	0	0	0	0	0	0	0	0	0	0	0	0	0	11.78	0	0	42	0	0	0	7.21	0	0	0	0	0	0	0	0	0	0	0	0	0	0	34.91	0	0	0	0	0	0	0	0	0
ACSS2	6.99	0	0	0	1.86	0	0	10.86	0	0	0	0	0	18.41	4.7	0	0	0	0	5.15	0	0	10.91	0	0	0	15.32	0	8.58	0	0	0	2.59	3.88	7.69	0	0	0	0	0	0	0	0	0	0	0	21.92	0	14.01
SMPD4	2.62	2.65	3.29	0	1.86	0	9.38	3.62	0	0	1.13	0	0	0	9.39	2.53	0	0	3.37	0	0	0	0	0	0	2.4	3.06	0	0	1.81	0	0	5.18	7.76	0	0	0	0	0	0	0	0	0	4.24	16.17	0	5.48	13.69	0
ANKDD1A	9.61	15.9	3.29	0	0	2.5	0	14.48	12.45	0	7.93	0	0	0	4.7	0	0	0	3.37	0	4.2	0	10.91	0	0	0	0	0	0	0	0	3.4	5.18	9.7	2.56	0	0	0	0	0	0	0	0	0	0	0	0	0	0
JADE2	0	7.95	1.64	0	0	0	0	0	0	0	0	0	0	2.3	0	5.06	0	0	0	0	0	0	8.19	0	0	0	15.32	0	0	7.25	0	0	2.59	9.7	0	0	0	0	0	19.95	0	22.87	0	0	0	0	32.88	0	0
PLEKHG1	2.62	0	1.64	0	7.44	5	0	2.41	0	0	18.13	0	0	0	0	0	0	0	10.11	0	0	9.56	19.1	0	0	0	0	0	8.58	5.43	0	3.4	10.36	9.7	0	0	0	0	10.01	0	0	0	0	0	0	0	0	0	0
ZBTB14	4.37	0	1.64	0	9.31	12.51	0	0	0	0	0	0	0	2.3	0	0	0	0	0	2.58	0	9.56	0	0	0	0	0	0	0	3.62	0	3.4	0	5.82	0	0	21.5	10.29	0	0	8.87	0	0	0	3.23	0	1.83	0	0
ABHD2	0	18.55	6.58	0	3.72	2.5	9.38	1.21	0	0	1.13	0	0	0	14.09	7.58	0	0	6.74	3.86	0	9.56	5.46	0	0	0	0	0	0	7.25	0	0	7.77	5.82	7.69	0	0	0	0	0	0	0	0	0	0	2.42	0	3.42	3.5
STRIP2	0	0	4.93	0	0	0	0	10.86	0	0	0	0	8.57	0	9.39	0	0	7.85	0	5.15	0	3.83	0	0	0	0	0	0	0	3.62	0	0	2.59	5.82	0	23	0	0	0	0	0	19.05	0	0	0	9.69	10.96	0	0
ZBTB24	0	0	0	0	0	0	5.63	0	0	0	0	0	0	0	0	2.53	0	0	0	20.6	0	0	0	0	0	43.27	0	0	34.31	7.25	0	0	5.18	15.52	0	0	0	0	0	0	0	0	0	0	0	4.85	0	0	0
CLHC1	1.75	0	0	0	13.03	0	0	0	0	0	0	0	0	0	4.7	5.06	0	7.85	3.37	0	0	15.3	0	0	14.41	0	3.06	0	0	5.43	0	0	2.59	0	0	0	0	0	0	0	0	0	0	12.73	0	0	21.92	0	0
PCED1B	5.24	0	6.58	0	0	0	16.89	9.65	0	0	0	0	0	2.3	0	5.06	0	0	0	0	0	22.95	0	0	0	0	0	0	0	5.43	0	0	0	5.82	2.56	26.84	0	0	0	0	0	0	0	0	6.47	0	0	0	0
CHAF1B	2.62	0	0	0	7.44	0	0	0	0	0	0	0	2.86	11.51	0	2.53	0	15.7	3.37	1.29	4.2	0	5.46	0	0	0	0	0	0	3.62	0	0	12.95	5.82	0	0	21.5	0	0	0	0	0	0	0	0	0	0	0	0
HIST1H2BG	1.75	0	0	0	0	0	0	0	0	0	11.33	0	0	0	4.7	7.58	0	15.7	3.37	0	4.2	0	0	0	0	0	3.06	0	0	5.43	0	0	0	1.94	2.56	3.83	6.14	0	0	0	0	0	0	0	3.23	31.5	0	10.27	17.51
LOXL1-AS1	6.11	0	0	0	0	0	0	1.21	0	0	0	0	0	13.81	0	0	0	3.93	3.37	3.86	0	0	0	4.04	0	4.81	0	0	8.58	5.43	0	0	12.95	13.58	12.81	0	0	0	0	0	0	0	0	0	0	21.81	0	0	0
TMEM155	9.61	0	0	0	0	7.5	0	10.86	0	3.85	2.27	0	0	0	0	12.64	0	0	0	2.58	0	0	8.19	0	0	0	0	0	0	0	0	3.4	5.18	7.76	5.13	0	30.71	0	0	0	0	0	0	0	0	0	0	0	0
ANKRD13D	11.36	0	0	0	0	2.5	0	0	0	0	0	0	2.86	0	4.7	7.58	0	0	3.37	0	0	19.13	0	0	4.8	14.42	0	0	0	3.62	0	0	10.36	9.7	0	0	0	0	0	0	5.91	0	0	0	0	0	0	0	31.51
PEX1	0	0	0	0	3.72	0	0	0	0	0	7.93	9.43	0	11.51	14.09	5.06	0	0	3.37	0	0	0	0	0	0	0	0	0	0	7.25	0	3.4	7.77	7.76	15.38	0	0	0	0	0	0	0	0	0	12.94	2.42	0	0	10.5
TMEM74B	9.61	2.65	0	0	18.61	2.5	0	9.65	0	0	0	0	2.86	0	0	0	0	3.93	3.37	11.59	0	0	0	0	0	0	0	0	0	0	0	0	0	3.88	0	0	0	0	0	0	8.87	0	0	0	0	0	0	0	0
RCCD1	3.49	10.6	0	0	0	0	0	6.03	0	0	0	0	0	6.91	0	0	0	15.7	6.74	0	0	0	0	0	0	0	0	0	0	14.49	0	0	5.18	1.94	5.13	0	0	0	0	0	0	15.24	7.62	0	0	46.04	0	0	0
ASB7	1.75	13.25	0	0	0	0	0	7.24	0	0	4.53	0	0	0	9.39	2.53	0	0	20.22	0	0	5.74	5.46	0	0	0	21.45	0	0	7.25	0	3.4	7.77	9.7	2.56	0	0	0	0	0	0	0	0	0	0	0	0	0	0
RAPGEF3	0	2.65	16.45	0	0	0	11.26	1.21	0	0	4.53	0	0	0	0	0	0	0	3.37	12.88	0	3.83	0	16.15	14.41	0	0	0	0	1.81	0	17	7.77	1.94	0	0	0	0	0	4.99	0	0	0	0	0	16.96	0	0	0
COL12A1	5.24	5.3	0	0	1.86	0	0	0	0	38.54	0	9.43	0	0	9.39	2.53	0	0	0	5.15	0	0	0	0	0	0	0	0	17.15	0	0	0	10.36	1.94	5.13	0	3.07	0	0	0	0	0	0	0	0	0	0	0	0
TEAD2	5.24	13.25	6.58	0	0	0	13.14	0	0	0	0	0	0	0	0	2.53	0	0	3.37	0	0	0	0	12.11	2.4	0	9.19	0	0	5.43	0	0	0	5.82	5.13	0	0	0	0	0	17.74	0	0	0	9.7	24.23	0	0	0
PEX6	4.37	0	0	0	0	0	1.88	0	0	3.85	0	0	0	0	4.7	12.64	0	0	6.74	0	0	0	0	0	0	0	15.32	0	0	0	0	17	5.18	7.76	0	0	0	0	35.04	0	5.91	7.62	0	0	0	24.23	0	0	0
UBQLN4	1.75	0	4.93	0	0	0	0	7.24	0	0	0	0	0	0	4.7	5.06	0	0	3.37	9.01	0	0	0	0	0	2.4	0	0	0	1.81	0	6.8	5.18	3.88	0	0	61.43	5.15	0	0	0	3.81	0	0	0	0	0	0	0
TH	0	13.25	3.29	0	0	0	20.64	10.86	0	0	1.13	0	0	0	0	0	0	3.93	0	10.3	0	0	0	0	33.63	2.4	0	0	0	0	0	0	0	0	0	0	36.86	0	0	0	0	0	0	0	0	0	0	0	0
SEMA6D	0	0	0	0	0	7.5	1.88	9.65	0	23.12	3.4	0	0	6.91	0	5.06	0	0	3.37	0	0	1.91	0	0	0	7.21	0	0	0	14.49	0	0	0	1.94	7.69	0	0	0	0	0	0	0	0	0	29.11	16.96	0	0	0
LOC101929340	2.62	15.9	11.51	0	0	0	0	4.83	0	0	0	0	0	0	0	2.53	0	0	16.85	12.88	0	0	10.91	0	0	0	0	0	0	5.43	0	0	5.18	3.88	0	0	0	0	0	0	0	0	0	42.43	0	0	0	0	0
SLC7A6	4.37	5.3	0	0	9.31	2.5	1.88	8.45	0	0	0	28.3	0	0	0	7.58	0	0	30.33	1.29	0	1.91	0	0	0	0	0	0	8.58	1.81	0	0	0	9.7	2.56	0	15.36	0	0	0	0	0	15.23	0	0	2.42	0	0	0
ZNF436	0.87	0	0	0	1.86	5	0	4.83	0	0	6.8	0	0	4.6	4.7	0	0	3.93	0	0	0	3.83	0	0	0	0	18.38	0	0	12.68	0	0	2.59	21.35	0	0	0	0	0	0	0	7.62	0	0	0	0	0	13.69	0
MAP3K5	5.24	0	14.8	0	1.86	0	0	7.24	0	0	7.93	0	0	0	0	5.06	0	0	6.74	0	37.8	0	0	0	0	24.04	0	0	0	0	0	0	18.12	7.76	2.56	0	0	0	0	0	0	0	0	0	0	2.42	0	0	0
RASGEF1A	0	0	0	0	14.89	0	0	0	0	0	3.4	0	0	0	0	0	0	7.85	0	1.29	0	0	0	0	0	0	0	0	0	10.87	0	0	5.18	7.76	0	0	0	0	0	0	5.91	0	45.7	0	0	7.27	0	0	21.01
FAM200A	4.37	2.65	6.58	0	0	0	0	0	0	15.42	0	0	0	0	0	2.53	0	3.93	3.37	0	0	0	0	0	0	9.62	0	0	0	0	0	3.4	0	7.76	7.69	0	0	15.44	0	0	0	0	26.66	0	3.23	0	3.65	0	7
RBPMS-AS1	0	0	0	0	0	0	0	0	0	0	0	0	0	0	0	5.06	0	0	0	9.01	12.6	17.21	0	0	0	19.23	0	0	0	0	0	0	5.18	1.94	0	0	46.07	0	0	0	0	15.24	0	0	0	0	0	0	0
UEVLD	4.37	0	6.58	0	0	0	1.88	1.21	0	0	13.6	0	0	13.81	0	15.17	0	0	16.85	15.45	0	1.91	0	0	0	0	0	0	0	3.62	0	3.4	5.18	7.76	0	11.5	0	2.57	0	4.99	5.91	0	0	0	0	0	0	0	0
PI4K2A	0	2.65	1.64	0	0	12.51	0	0	0	23.12	0	0	0	0	0	12.64	0	0	43.81	0	0	0	2.73	0	0	0	0	0	0	5.43	0	0	7.77	5.82	5.13	0	0	0	0	4.99	0	0	0	0	0	0	0	0	0
ST18	28.83	15.9	0	0	0	2.5	0	1.21	0	0	13.6	0	0	0	4.7	2.53	0	0	6.74	0	0	0	0	0	19.21	0	0	0	0	0	0	0	20.71	5.82	0	0	21.5	0	0	0	14.78	0	7.62	0	0	0	0	0	0
GANC	3.49	0	3.29	0	1.86	0	0	7.24	0	0	6.8	0	0	0	9.39	2.53	0	7.85	6.74	3.86	0	0	5.46	0	12.01	0	0	0	0	0	0	3.4	2.59	9.7	15.38	0	0	2.57	0	0	0	34.3	0	0	0	0	0	0	0
HDAC7	6.11	5.3	6.58	0	0	0	0	2.41	0	0	4.53	0	0	0	9.39	0	0	7.85	10.11	3.86	0	15.3	5.46	16.15	0	0	42.89	0	0	9.06	0	6.8	2.59	1.94	0	0	0	0	0	0	0	0	0	0	0	0	0	0	0
TSPAN17	2.62	2.65	3.29	0	5.58	12.51	0	14.48	0	0	5.67	0	2.86	0	0	2.53	0	0	3.37	7.73	0	0	13.64	0	0	0	0	0	0	7.25	0	3.4	2.59	0	2.56	0	24.57	0	0	0	11.82	0	0	4.24	22.64	0	0	0	0
CRYBB2	5.24	7.95	9.87	0	1.86	0	3.75	3.62	0	0	10.2	0	2.86	0	9.39	7.58	0	0	6.74	2.58	0	3.83	0	8.08	0	0	3.06	0	8.58	1.81	0	3.4	2.59	3.88	5.13	0	3.07	5.15	0	0	0	0	15.23	0	0	9.69	0	0	0
IER5L	7.86	0	0	0	14.89	5	0	0	0	23.12	0	0	0	0	0	0	0	0	6.74	7.73	4.2	0	8.19	0	2.4	24.04	3.06	0	0	3.62	0	0	23.3	0	0	0	0	0	0	0	0	3.81	7.62	0	6.47	2.42	0	0	0
RAB27A	0	2.65	13.16	0	7.44	0	0	0	0	0	0	0	0	4.6	0	17.7	0	19.63	10.11	0	0	0	0	0	0	0	0	0	0	12.68	0	0	0	1.94	2.56	0	0	10.29	0	0	0	0	0	0	16.17	14.54	0	0	0
IP6K1	5.24	0	0	0	11.17	5	0	0	0	0	0	0	0	0	9.39	5.06	0	11.78	0	2.58	0	3.83	0	4.04	0	0	0	0	0	3.62	0	0	5.18	0	2.56	0	0	0	0	19.95	29.56	0	0	0	0	0	0	0	17.51
ULK2	1.75	0	3.29	0	0	0	0	0	0	0	0	0	5.71	0	23.48	0	0	0	0	34.77	0	0	2.73	0	0	0	6.13	0	0	12.68	0	10.2	5.18	1.94	12.81	0	9.21	0	0	0	0	0	0	0	0	0	0	0	0
RNF31	5.24	5.3	0	0	0	0	5.63	1.21	0	0	2.27	0	8.57	0	4.7	5.06	0	0	3.37	20.6	0	0	0	16.15	0	4.81	3.06	0	0	3.62	0	3.4	0	17.46	0	0	0	0	0	0	2.96	0	11.43	0	9.7	0	0	0	3.5
ZBTB7B	0	5.3	1.64	0	0	0	0	4.83	0	0	15.87	0	0	4.6	18.78	5.06	0	19.63	0	0	0	0	0	0	0	12.02	0	0	0	3.62	0	0	5.18	0	0	0	0	0	0	4.99	5.91	7.62	7.62	8.49	0	0	29.23	0	0
WDHD1	3.49	0	0	0	0	0	33.78	0	0	0	0	0	8.57	0	0	0	0	0	3.37	1.29	12.6	5.74	0	0	0	4.81	0	0	0	1.81	0	6.8	2.59	5.82	0	0	0	23.16	0	0	0	0	0	0	0	0	0	0	0
THBS3	0.87	0	1.64	0	1.86	0	0	0	0	0	9.07	18.87	11.42	0	9.39	10.11	0	0	3.37	0	0	9.56	0	12.11	7.21	0	0	0	0	5.43	0	0	0	5.82	2.56	0	9.21	0	0	0	0	0	0	0	3.23	0	0	0	0
CAMSAP1	0.87	2.65	0	0	0	7.5	0	3.62	0	0	0	0	14.28	23.02	0	10.11	0	0	0	2.58	0	0	21.83	0	0	0	0	0	17.15	14.49	0	0	5.18	15.52	5.13	0	0	2.57	0	0	14.78	0	7.62	0	6.47	0	0	3.42	0
FAM219B	7.86	7.95	0	0	9.31	0	0	2.41	0	3.85	9.07	0	14.28	18.41	0	0	0	0	0	0	0	3.83	0	0	0	0	0	0	0	5.43	0	0	2.59	1.94	0	0	0	0	0	0	0	0	0	0	12.94	0	0	37.66	10.5
LOC100288181	9.61	13.25	0	0	5.58	0	0	0	0	0	0	0	0	4.6	0	5.06	0	0	0	0	0	15.3	0	0	0	0	45.96	0	0	7.25	0	10.2	0	5.82	0	0	0	0	0	0	0	26.68	0	12.73	3.23	7.27	0	0	0
HHLA1	6.11	10.6	9.87	0	3.72	0	1.88	1.21	0	0	0	0	0	0	0	35.4	0	15.7	0	0	0	0	0	0	24.02	0	0	0	8.58	9.06	0	0	0	9.7	5.13	0	0	0	0	0	2.96	0	0	0	0	0	0	0	0
PAXBP1	6.99	0	16.45	0	0	0	0	3.62	0	0	22.67	0	0	0	4.7	7.58	0	0	3.37	5.15	0	7.65	2.73	0	14.41	0	3.06	0	0	7.25	0	0	0	11.64	0	0	3.07	2.57	0	0	0	0	7.62	0	3.23	0	0	0	0
LINC00470	15.72	2.65	0	0	18.61	0	0	0	0	3.85	0	0	0	16.11	0	15.17	0	0	0	6.44	0	1.91	0	0	12.01	26.45	3.06	0	0	9.06	0	10.2	5.18	9.7	2.56	0	0	0	0	0	0	0	0	0	0	2.42	0	0	7
DPH5	6.11	0	8.22	0	1.86	0	0	6.03	0	0	0	0	14.28	4.6	0	7.58	0	0	3.37	6.44	0	0	8.19	0	0	0	0	0	8.58	1.81	0	3.4	0	1.94	2.56	0	0	18.02	0	0	0	0	0	0	0	0	0	0	0
PTBP2	0	0	0	0	5.58	0	0	2.41	0	0	0	18.87	2.86	0	4.7	0	0	0	6.74	24.47	8.4	5.74	0	0	0	0	6.13	0	0	3.62	0	0	0	11.64	0	0	0	0	0	0	0	0	3.81	0	0	2.42	1.83	10.27	0
SYNJ1	0.87	0	0	0	1.86	0	0	0	0	3.85	0	0	0	2.3	0	12.64	0	0	13.48	0	0	26.78	0	0	31.22	0	3.06	0	0	7.25	0	6.8	7.77	11.64	5.13	0	0	0	0	0	0	3.81	0	0	0	0	20.09	0	7
TMEM136	6.99	0	1.64	0	5.58	5	0	0	0	0	0	0	0	4.6	0	5.06	0	0	50.55	6.44	16.8	0	0	0	0	0	0	0	0	9.06	0	3.4	18.12	9.7	23.06	0	0	0	5.01	0	0	0	0	0	0	0	0	0	0
CASQ1	3.49	0	0	0	9.31	0	0	0	0	0	0	0	0	0	0	2.53	0	11.78	6.74	6.44	0	0	21.83	0	0	7.21	0	0	0	5.43	0	0	2.59	19.41	0	0	43	0	0	0	0	0	0	0	0	0	0	0	0
ZNF420	0.87	0	0	0	3.72	7.5	0	3.62	0	0	0	0	5.71	9.21	0	7.58	0	0	3.37	2.58	0	0	8.19	0	0	0	3.06	0	0	5.43	0	3.4	0	5.82	2.56	0	36.86	0	0	0	5.91	0	19.04	29.7	0	0	0	0	0
TRIM11	6.11	2.65	8.22	0	5.58	0	11.26	10.86	0	0	9.07	0	8.57	4.6	4.7	2.53	0	0	0	0	0	13.39	0	0	0	4.81	0	0	0	1.81	0	0	7.77	3.88	0	3.83	0	0	0	0	5.91	30.49	19.04	0	0	0	0	0	0
WDR53	0	0	0	0	5.58	0	0	10.86	0	0	19.27	9.43	0	4.6	4.7	5.06	0	3.93	6.74	5.15	21	0	10.91	0	24.02	0	0	0	8.58	9.06	0	6.8	2.59	1.94	5.13	0	0	0	0	0	0	0	0	0	0	0	0	0	0
TDP1	11.36	0	0	0	13.03	5	0	1.21	0	0	0	0	0	0	0	5.06	0	0	3.37	7.73	0	0	0	0	0	7.21	0	0	0	7.25	0	3.4	7.77	7.76	0	7.67	0	2.57	0	0	0	22.87	0	0	0	0	0	0	0
C1orf105	4.37	13.25	6.58	0	0	0	0	0	0	0	0	0	0	43.73	4.7	5.06	0	0	0	0	0	0	5.46	0	21.62	0	0	0	17.15	0	0	0	5.18	0	10.25	0	27.64	2.57	0	0	0	0	0	0	0	0	0	0	0
B9D1	0.87	15.9	9.87	0	11.17	0	0	0	0	0	0	0	0	0	9.39	12.64	0	3.93	0	24.47	0	0	2.73	0	0	0	0	0	0	9.06	0	3.4	0	9.7	5.13	0	36.86	0	0	0	0	3.81	0	0	3.23	0	0	3.42	0
MR1	5.24	5.3	11.51	0	13.03	0	3.75	0	0	0	0	0	11.42	6.91	14.09	2.53	0	19.63	10.11	19.31	0	0	13.64	0	2.4	0	0	0	0	0	0	0	10.36	1.94	7.69	0	0	0	0	0	0	0	0	0	0	0	0	0	0
SNX7	6.11	0	11.51	0	0	0	0	0	0	0	1.13	0	0	2.3	9.39	15.17	0	0	0	0	0	0	0	4.04	0	0	12.25	0	0	14.49	0	6.8	15.54	9.7	2.56	0	0	0	0	19.95	0	0	0	0	32.34	0	20.09	0	0
UBALD2	7.86	2.65	0	0	0	0	1.88	2.41	0	15.42	0	0	0	0	4.7	7.58	0	7.85	3.37	0	0	7.65	0	0	0	0	0	0	0	23.55	0	0	0	0	2.56	0	6.14	33.46	0	0	0	41.92	0	0	0	2.42	0	0	0
RCC1L	2.62	0	4.93	0	0	0	0	0	0	0	0	0	0	0	0	10.11	0	0	0	11.59	0	0	0	4.04	0	0	24.51	0	0	5.43	0	0	15.54	3.88	0	3.83	36.86	2.57	5.01	0	11.82	0	0	0	0	0	0	0	31.51
CTPS2	1.75	5.3	0	0	0	0	16.89	8.45	0	0	13.6	0	2.86	0	0	2.53	0	0	10.11	3.86	0	0	0	0	0	0	0	0	0	10.87	0	0	0	3.88	0	0	0	0	0	0	23.65	0	41.9	0	0	0	0	0	21.01
C16orf70	0.87	0	1.64	0	13.03	2.5	3.75	6.03	0	0	1.13	0	8.57	0	0	2.53	0	0	6.74	3.86	0	0	0	0	4.8	0	0	0	0	9.06	0	0	7.77	1.94	2.56	0	9.21	10.29	0	0	5.91	0	0	4.24	3.23	2.42	0	0	3.5
MIF4GD	2.62	2.65	0	0	11.17	0	3.75	10.86	0	0	3.4	0	19.99	16.11	0	0	0	0	3.37	0	16.8	0	0	0	0	0	0	0	0	1.81	0	0	0	7.76	5.13	0	0	0	0	0	5.91	11.43	0	0	0	0	20.09	20.54	3.5
IQCE	3.49	0	0	0	0	0	0	6.03	0	0	3.4	0	0	11.51	9.39	7.58	0	3.93	0	9.01	0	7.65	0	12.11	0	2.4	12.25	0	8.58	9.06	0	3.4	0	7.76	5.13	0	18.43	0	0	29.92	0	0	0	0	0	0	0	0	0
MAP3K11	10.48	5.3	1.64	0	7.44	15.01	18.77	1.21	0	0	0	0	0	13.81	9.39	2.53	0	0	3.37	0	0	0	0	0	2.4	21.64	9.19	0	0	12.68	0	3.4	15.54	7.76	2.56	0	0	0	0	0	0	0	15.23	0	0	7.27	1.83	0	0
RNF41	3.49	2.65	21.38	0	0	7.5	0	1.21	0	0	9.07	0	0	0	9.39	2.53	0	3.93	16.85	1.29	0	1.91	0	0	9.61	7.21	0	0	0	9.06	0	6.8	0	1.94	10.25	0	0	0	20.02	0	2.96	0	0	21.21	0	12.12	0	0	0
SIRT1	13.1	7.95	0	0	0	0	0	3.62	0	0	1.13	56.61	0	0	4.7	2.53	0	0	0	6.44	0	0	0	0	16.81	0	0	0	0	1.81	0	3.4	7.77	11.64	5.13	0	0	0	0	0	0	0	0	0	0	0	0	0	28.01
SART1	16.6	15.9	0	0	1.86	10.01	0	0	0	0	0	0	11.42	9.21	9.39	0	0	0	6.74	6.44	0	7.65	0	0	2.4	2.4	6.13	0	0	5.43	0	6.8	12.95	7.76	7.69	0	0	0	0	0	0	0	0	0	0	0	0	0	0
HRAS	5.24	0	1.64	0	1.86	5	0	0	0	0	0	28.3	0	13.81	4.7	7.58	0	0	16.85	1.29	0	0	0	0	0	0	0	0	0	7.25	0	0	12.95	1.94	5.13	0	0	0	0	0	38.43	0	0	0	0	0	1.83	0	0
RIC8B	0	0	0	0	0	0	0	0	0	0	13.6	9.43	0	0	0	7.58	0	0	6.74	9.01	0	9.56	13.64	0	0	0	3.06	0	25.73	23.55	0	6.8	0	7.76	2.56	0	0	0	0	0	0	26.68	0	0	0	7.27	5.48	0	7
ZNF264	3.49	15.9	14.8	0	1.86	0	3.75	9.65	0	0	0	0	19.99	0	0	7.58	0	0	6.74	2.58	0	0	0	0	0	0	0	0	0	7.25	0	6.8	10.36	3.88	2.56	0	3.07	2.57	5.01	0	2.96	11.43	0	4.24	0	0	1.83	0	21.01
EPT1	5.24	18.55	6.58	0	1.86	10.01	0	0	0	0	14.73	0	0	0	18.78	7.58	0	0	10.11	23.18	0	0	0	0	0	0	0	0	0	5.43	0	10.2	2.59	3.88	2.56	0	0	0	0	0	0	0	0	12.73	0	0	0	0	7
WDR25	0.87	0	8.22	0	0	0	0	3.62	0	0	0	0	5.71	13.81	0	2.53	0	3.93	6.74	6.44	0	0	0	0	0	0	0	0	8.58	7.25	0	0	2.59	3.88	0	0	0	0	0	0	0	45.73	15.23	0	0	0	0	0	17.51
ACTR3B	4.37	0	0	0	0	7.5	0	4.83	0	0	2.27	0	0	0	0	10.11	0	0	0	6.44	0	0	43.66	0	0	0	6.13	0	0	9.06	0	10.2	7.77	5.82	2.56	0	0	0	0	0	0	0	0	0	0	4.85	0	0	0
ITGB6	0	5.3	3.29	0	0	0	0	0	0	0	12.47	0	5.71	0	46.96	15.17	0	0	53.92	0	4.2	0	0	0	0	0	0	0	0	9.06	0	0	2.59	0	41	0	0	0	0	0	5.91	0	0	0	0	9.69	0	0	0
LDLRAP1	7.86	0	3.29	0	18.61	0	0	0	0	0	0	0	0	0	0	12.64	0	0	3.37	1.29	0	0	8.19	0	0	0	0	0	0	16.3	0	3.4	7.77	13.58	0	0	0	0	0	0	26.61	0	0	0	0	24.23	0	0	0
TSTD2	0.87	0	9.87	0	1.86	0	0	13.27	0	0	0	0	5.71	0	4.7	2.53	0	0	0	0	0	3.83	0	12.11	0	0	0	0	0	3.62	0	3.4	10.36	7.76	5.13	0	0	2.57	0	19.95	0	0	0	50.91	0	31.5	0	0	0
CEP76	2.62	0	13.16	0	0	0	0	21.72	0	15.42	4.53	0	0	9.21	4.7	7.58	0	3.93	0	9.01	0	1.91	24.56	0	0	9.62	0	0	0	5.43	0	0	7.77	7.76	0	0	27.64	0	0	0	0	22.87	0	0	3.23	0	7.31	0	0
PRSS36	5.24	0	0	0	0	0	11.26	0	0	0	6.8	0	0	0	0	2.53	0	0	6.74	0	0	1.91	0	12.11	0	31.25	0	0	0	0	0	0	0	0	2.56	0	0	0	0	0	0	0	0	0	3.23	0	0	0	0
ATXN7L3	9.61	2.65	0	0	5.58	5	5.63	7.24	0	0	22.67	0	2.86	4.6	0	10.11	0	3.93	10.11	3.86	0	5.74	0	0	2.4	4.81	3.06	0	8.58	14.49	0	3.4	12.95	1.94	5.13	11.5	3.07	0	0	0	14.78	0	0	0	0	0	9.13	0	0
ZBTB25	0	2.65	0	0	5.58	20.01	0	0	0	0	0	0	0	0	4.7	0	0	0	10.11	11.59	0	0	0	0	45.64	4.81	0	0	25.73	0	0	0	0	5.82	5.13	15.34	0	5.15	0	0	0	0	0	0	12.94	2.42	7.31	13.69	0
C7orf43	9.61	0	1.64	0	0	0	0	0	0	0	4.53	0	0	4.6	9.39	7.58	0	15.7	13.48	3.86	0	7.65	0	0	0	0	0	0	0	12.68	0	0	10.36	9.7	2.56	0	0	0	20.02	0	0	7.62	0	4.24	0	0	0	0	0
RTN4R	0	0	0	0	1.86	0	13.14	0	0	0	3.4	0	0	0	0	5.06	0	0	0	0	0	3.83	10.91	0	0	0	0	0	0	10.87	0	0	7.77	1.94	0	19.17	0	23.16	40.05	0	0	0	0	0	19.4	0	0	0	0
CXorf23	0.87	2.65	4.93	0	0	32.52	0	14.48	0	0	2.27	9.43	2.86	2.3	4.7	2.53	0	0	6.74	6.44	0	28.69	8.19	0	0	0	6.13	0	0	12.68	0	0	10.36	13.58	0	0	0	0	0	0	29.56	0	0	0	0	0	0	0	0
NOSTRIN	3.49	0	8.22	0	0	0	0	0	0	0	10.2	0	0	4.6	9.39	2.53	0	3.93	13.48	0	0	0	13.64	0	43.23	24.04	3.06	0	17.15	7.25	0	0	0	5.82	0	0	0	0	0	0	0	0	0	0	0	0	0	0	14.01
MAP3K1	6.99	18.55	0	0	1.86	2.5	0	0	0	7.71	0	0	0	6.91	0	2.53	0	0	0	7.73	0	0	0	4.04	0	0	0	0	0	7.25	0	3.4	15.54	3.88	0	42.17	0	0	0	0	0	7.62	0	0	3.23	9.69	0	0	14.01
CELSR1	0.87	13.25	18.09	0	0	15.01	0	0	0	15.42	12.47	0	0	0	0	17.7	0	0	20.22	0	0	0	0	0	2.4	0	0	0	0	10.87	0	17	7.77	0	2.56	15.34	0	12.87	5.01	0	0	0	0	0	0	0	0	0	0
SMOC2	0	0	0	0	3.72	2.5	0	7.24	0	0	1.13	0	0	0	9.39	7.58	0	0	20.22	0	0	0	0	8.08	0	0	0	0	0	14.49	0	3.4	5.18	5.82	5.13	0	0	0	0	0	0	0	0	38.19	12.94	7.27	25.57	3.42	0
CP	26.2	0	13.16	0	0	2.5	1.88	66.36	0	0	0	0	0	0	0	10.11	0	0	0	0	0	0	0	0	2.4	12.02	0	0	0	3.62	0	3.4	10.36	40.75	2.56	0	0	0	0	0	0	0	0	0	0	0	0	0	0
SSBP2	0	0	0	0	0	20.01	11.26	2.41	24.9	0	1.13	18.87	0	13.81	0	0	0	0	10.11	1.29	0	1.91	0	12.11	0	0	0	0	17.15	7.25	0	3.4	2.59	0	0	0	0	0	50.06	0	5.91	0	0	0	0	0	0	0	0
ZBED5-AS1	4.37	0	6.58	0	11.17	0	0	14.48	0	0	13.6	0	5.71	4.6	14.09	15.17	0	0	6.74	0	0	0	2.73	0	0	0	24.51	0	0	5.43	0	3.4	5.18	3.88	5.13	0	18.43	0	0	0	0	0	0	0	0	0	0	0	0
COL6A1	0	0	0	0	0	0	0	10.86	0	0	1.13	0	22.85	13.81	0	5.06	0	0	10.11	1.29	0	0	2.73	0	0	0	0	0	0	1.81	0	0	0	3.88	0	0	0	0	0	0	17.74	0	0	0	3.23	0	0	0	0
NFRKB	5.24	0	8.22	0	0	0	1.88	13.27	0	0	9.07	9.43	0	4.6	0	0	0	0	10.11	0	0	0	5.46	0	36.03	0	3.06	0	8.58	14.49	0	3.4	10.36	7.76	7.69	0	30.71	0	0	0	14.78	0	0	0	0	0	0	0	3.5
HS1BP3-IT1	1.75	2.65	1.64	0	0	0	0	0	0	42.39	10.2	0	0	6.91	4.7	0	0	0	10.11	1.29	0	19.13	0	0	0	2.4	36.76	0	0	1.81	0	0	15.54	9.7	5.13	0	0	0	0	0	0	0	15.23	0	3.23	2.42	16.44	3.42	10.5
LOC105747689	0	0	0	0	26.06	0	0	1.21	0	0	0	47.17	0	0	0	0	0	0	10.11	0	0	0	0	0	0	0	0	0	68.62	0	0	0	7.77	0	0	0	0	0	0	0	0	57.16	0	0	0	0	0	0	0
CMPK2	0.87	0	0	0	0	0	0	6.03	0	0	6.8	0	0	16.11	9.39	17.7	0	0	0	7.73	0	0	21.83	0	0	0	0	0	34.31	16.3	0	0	0	7.76	0	0	0	0	0	0	2.96	11.43	0	0	0	12.12	9.13	0	0
PAQR3	0	13.25	0	0	1.86	10.01	11.26	0	0	0	0	9.43	25.7	0	4.7	10.11	0	0	16.85	0	25.2	0	2.73	0	0	0	0	0	0	12.68	0	17	7.77	13.58	5.13	0	0	0	0	0	0	0	0	0	0	0	0	0	0
IQCB1	6.11	0	3.29	0	5.58	10.01	5.63	12.07	0	0	0	0	5.71	0	4.7	17.7	0	11.78	0	3.86	0	0	0	0	16.81	0	3.06	0	0	10.87	0	0	0	7.76	17.94	0	18.43	0	0	0	0	26.68	0	16.97	12.94	2.42	10.96	0	0
ASTE1	8.73	7.95	0	0	0	2.5	0	0	0	0	3.4	0	0	0	0	0	0	0	0	11.59	0	1.91	5.46	0	0	4.81	3.06	0	8.58	7.25	0	6.8	5.18	5.82	2.56	3.83	6.14	0	0	0	32.52	19.05	3.81	0	0	24.23	0	3.42	0
PI4K2B	12.23	0	6.58	0	0	0	0	0	0	0	0	0	2.86	2.3	14.09	0	0	0	16.85	9.01	0	1.91	8.19	0	26.42	12.02	18.38	0	0	12.68	0	0	7.77	3.88	2.56	0	0	0	0	0	0	0	0	0	0	14.54	0	0	0
EXOC3	7.86	0	6.58	0	1.86	5	0	0	0	3.85	1.13	0	25.7	20.72	4.7	0	0	3.93	20.22	2.58	0	5.74	0	8.08	9.61	0	0	0	0	12.68	0	10.2	33.66	5.82	7.69	0	0	0	0	0	0	0	3.81	0	0	2.42	0	0	0
SYT17	10.48	18.55	0	0	18.61	30.02	0	0	0	0	0	0	8.57	0	0	20.23	0	0	6.74	15.45	0	1.91	27.28	0	0	0	0	0	17.15	16.3	0	3.4	15.54	11.64	5.13	0	0	0	0	0	0	0	0	0	0	0	0	0	0
ZBTB7A	13.1	5.3	0	0	7.44	2.5	0	0	12.45	0	7.93	0	0	0	14.09	10.11	0	3.93	33.7	11.59	0	0	0	12.11	0	4.81	0	0	8.58	19.92	0	10.2	15.54	11.64	7.69	0	12.29	0	0	4.99	0	0	0	0	0	0	3.65	0	0
RANBP9	3.49	0	3.29	0	3.72	10.01	0	0	0	3.85	0	18.87	0	0	9.39	5.06	0	0	6.74	3.86	0	0	0	4.04	45.64	14.42	0	0	0	7.25	0	6.8	7.77	9.7	0	0	0	0	0	0	0	3.81	0	8.49	0	21.81	0	10.27	3.5
KLHL12	5.24	10.6	4.93	0	0	2.5	13.14	6.03	0	0	5.67	0	5.71	0	4.7	7.58	0	0	6.74	6.44	0	1.91	5.46	4.04	0	31.25	6.13	0	0	14.49	0	6.8	2.59	5.82	2.56	0	0	0	35.04	0	0	0	30.47	8.49	0	0	0	0	0
TRAF3	5.24	2.65	4.93	0	5.58	0	30.03	3.62	0	0	4.53	0	0	6.91	14.09	0	0	0	3.37	7.73	0	3.83	0	0	0	14.42	0	0	0	5.43	0	0	12.95	9.7	2.56	0	0	0	0	0	44.34	0	0	0	0	0	0	0	0
TFCP2	4.37	2.65	0	0	1.86	0	0	4.83	12.45	3.85	1.13	0	14.28	13.81	37.57	2.53	0	15.7	6.74	16.74	0	3.83	10.91	0	12.01	0	0	0	0	7.25	0	3.4	12.95	3.88	2.56	0	0	0	0	0	0	0	0	0	0	0	7.31	0	3.5
ZW10	0.87	0	0	0	3.72	0	0	9.65	0	0	12.47	0	5.71	0	0	12.64	0	7.85	0	12.88	0	0	21.83	8.08	0	12.02	0	0	0	7.25	0	0	5.18	15.52	2.56	0	0	20.59	0	0	0	7.62	26.66	0	0	4.85	0	0	0
ZNF236	6.99	18.55	6.58	0	0	0	0	0	0	0	0	0	0	0	0	5.06	0	0	3.37	6.44	0	0	0	0	21.62	2.4	0	0	0	12.68	0	6.8	5.18	7.76	2.56	0	0	0	0	0	0	0	0	0	0	0	0	51.35	0
C16orf52	6.11	0	16.45	0	0	10.01	0	1.21	0	0	0	0	0	0	0	0	0	0	16.85	3.86	21	0	0	0	0	0	0	0	0	14.49	0	0	31.07	11.64	12.81	0	18.43	0	0	19.95	8.87	0	0	4.24	3.23	4.85	1.83	0	0
NR2F2	6.11	0	0	0	0	0	1.88	3.62	0	0	7.93	18.87	0	9.21	9.39	15.17	0	0	3.37	20.6	0	0	0	0	4.8	2.4	0	0	0	18.11	0	10.2	12.95	5.82	5.13	0	0	5.15	0	9.97	0	0	0	4.24	0	0	0	0	0
MCTP2	0.87	2.65	0	0	5.58	0	0	0	0	0	0	0	0	0	4.7	7.58	0	0	10.11	2.58	0	0	0	12.11	0	21.64	0	0	0	21.74	0	6.8	10.36	17.46	0	0	21.5	0	0	0	0	11.43	11.43	0	51.75	0	0	10.27	0
ERICH2	0.87	0	3.29	0	3.72	0	22.52	6.03	0	0	18.13	0	2.86	0	0	2.53	0	0	10.11	7.73	0	3.83	0	0	0	38.47	21.45	0	0	3.62	0	10.2	12.95	0	12.81	0	0	15.44	0	0	0	0	0	0	0	0	0	0	0
ATP5S	13.1	0	0	0	5.58	7.5	3.75	12.07	0	26.98	12.47	0	0	6.91	0	2.53	0	0	10.11	0	0	0	8.19	0	21.62	0	12.25	0	0	1.81	0	0	5.18	5.82	5.13	0	0	0	0	0	8.87	0	26.66	0	0	0	0	0	0
GSK3A	11.36	0	0	0	3.72	7.5	0	6.03	0	0	6.8	0	0	0	14.09	7.58	0	0	13.48	1.29	0	1.91	5.46	4.04	0	4.81	0	0	0	9.06	0	10.2	10.36	17.46	0	3.83	0	10.29	0	0	0	3.81	15.23	0	0	7.27	5.48	0	0
AQP11	4.37	7.95	1.64	0	0	7.5	0	0	0	0	0	0	8.57	11.51	0	10.11	0	0	0	0	0	19.13	0	8.08	0	9.62	0	0	17.15	10.87	0	0	2.59	17.46	0	0	0	30.88	0	0	0	0	0	0	0	0	47.49	0	0
AIM1	0	15.9	4.93	0	9.31	15.01	0	7.24	0	0	28.33	9.43	0	4.6	9.39	0	0	3.93	0	0	0	0	0	0	0	0	6.13	0	25.73	0	0	54.39	10.36	1.94	5.13	0	33.78	0	0	4.99	0	0	0	0	0	0	0	0	0
RNF115	3.49	0	6.58	0	9.31	0	0	0	0	0	13.6	0	0	0	14.09	12.64	0	0	10.11	7.73	0	0	13.64	0	40.83	0	0	0	8.58	23.55	0	3.4	5.18	17.46	5.13	15.34	0	0	0	0	0	0	0	16.97	0	0	0	0	0
LRRC40	4.37	0	1.64	0	0	0	13.14	14.48	0	0	5.67	0	2.86	18.41	4.7	5.06	0	19.63	3.37	6.44	0	5.74	10.91	0	0	0	0	0	0	5.43	0	3.4	15.54	23.29	5.13	0	0	5.15	0	0	0	3.81	7.62	0	0	0	0	0	38.52
C1QTNF1	14.85	0	0	0	9.31	0	0	0	0	0	7.93	9.43	0	0	0	5.06	0	0	0	6.44	0	9.56	0	0	0	0	15.32	0	0	18.11	0	0	0	11.64	0	0	15.36	0	0	0	0	45.73	3.81	12.73	0	12.12	0	23.96	0
ZNF267	2.62	0	4.93	0	0	0	0	0	0	0	0	0	0	2.3	23.48	7.58	0	0	3.37	0	0	5.74	16.37	12.11	0	21.64	0	0	0	10.87	0	0	15.54	15.52	10.25	0	0	0	0	0	0	0	0	0	0	0	0	30.81	14.01
SERPINB7	6.99	0	18.09	0	0	37.52	0	1.21	0	0	12.47	0	2.86	9.21	0	2.53	0	11.78	3.37	0	0	0	13.64	8.08	0	0	15.32	0	34.31	0	0	0	5.18	0	17.94	0	0	0	0	0	0	0	0	0	0	0	0	0	7
NEK11	0	0	23.03	0	7.44	0	0	4.83	0	0	9.07	0	0	0	4.7	10.11	0	0	0	10.3	0	0	0	0	0	14.42	0	0	0	9.06	0	10.2	2.59	7.76	7.69	0	0	0	5.01	4.99	0	0	0	0	3.23	0	1.83	0	0
ZDHHC18	7.86	5.3	0	0	13.03	0	0	3.62	0	0	1.13	18.87	8.57	2.3	9.39	12.64	0	0	3.37	14.16	0	0	13.64	0	0	45.68	0	0	0	5.43	0	0	10.36	0	7.69	0	0	2.57	0	0	2.96	0	0	0	9.7	0	0	0	0
FAM20B	2.62	2.65	1.64	0	9.31	5	1.88	12.07	0	0	4.53	9.43	8.57	4.6	4.7	7.58	0	0	26.96	0	0	0	0	16.15	0	9.62	0	0	0	12.68	0	6.8	41.43	15.52	10.25	0	0	0	0	0	2.96	0	0	0	3.23	0	1.83	0	0
AKAP1	6.11	21.19	18.09	0	0	0	0	0	49.79	3.85	0	0	0	0	14.09	7.58	0	11.78	0	0	8.4	5.74	2.73	16.15	0	7.21	0	0	0	9.06	0	0	15.54	7.76	10.25	0	0	0	0	0	0	7.62	0	0	3.23	0	0	0	0
PDE8B	13.98	10.6	6.58	0	0	0	24.4	0	0	0	0	0	5.71	0	0	15.17	0	0	16.85	0	0	0	0	4.04	24.02	0	3.06	0	0	9.06	0	3.4	5.18	5.82	2.56	0	0	5.15	0	0	0	0	0	0	0	0	0	17.12	0
ZNF570	7.86	5.3	1.64	0	9.31	12.51	3.75	2.41	87.13	0	17	18.87	0	0	4.7	2.53	0	0	0	1.29	0	0	0	0	0	14.42	0	0	0	5.43	0	0	0	5.82	0	0	0	0	0	0	0	0	0	0	0	31.5	0	0	0
ABCG2	0.87	21.19	11.51	0	16.75	2.5	0	10.86	0	0	0	0	8.57	4.6	9.39	10.11	0	0	0	0	8.4	0	16.37	0	0	43.27	0	0	0	18.11	0	0	7.77	1.94	5.13	0	0	0	0	0	2.96	0	0	0	0	29.08	0	0	0
SORD	19.22	21.19	0	0	5.58	15.01	0	0	0	3.85	14.73	0	8.57	0	0	7.58	0	31.41	6.74	6.44	0	0	0	32.3	0	12.02	0	0	0	1.81	0	0	7.77	9.7	2.56	0	3.07	0	0	0	0	7.62	15.23	4.24	0	0	0	0	0
PACS2	3.49	0	6.58	0	29.78	0	9.38	4.83	0	23.12	5.67	28.3	0	2.3	0	7.58	0	3.93	3.37	0	0	1.91	0	4.04	0	24.04	0	0	0	10.87	0	0	10.36	5.82	5.13	0	3.07	2.57	0	0	2.96	0	0	4.24	0	0	0	0	0
LOC102606465	15.72	13.25	0	0	5.58	25.02	13.14	0	0	3.85	19.27	0	11.42	0	14.09	15.17	0	0	0	3.86	0	0	19.1	0	0	0	6.13	0	0	9.06	0	0	2.59	11.64	5.13	0	0	0	0	0	0	0	0	0	0	0	18.27	0	0
TDRD7	0	0	0	0	5.58	10.01	0	0	0	7.71	1.13	0	5.71	0	9.39	10.11	0	0	3.37	2.58	0	0	27.28	16.15	0	0	0	0	8.58	0	0	6.8	12.95	7.76	5.13	0	0	10.29	0	0	2.96	0	0	4.24	0	0	1.83	30.81	17.51
ZNF700	1.75	0	16.45	0	13.03	7.5	0	13.27	0	3.85	1.13	18.87	0	4.6	0	10.11	0	0	20.22	12.88	21	0	0	16.15	0	7.21	0	0	8.58	12.68	0	6.8	2.59	3.88	5.13	0	0	20.59	0	0	29.56	0	0	0	0	4.85	0	0	0
ZHX1	12.23	5.3	0	0	16.75	0	0	6.03	0	0	0	18.87	0	6.91	18.78	7.58	0	3.93	13.48	29.62	0	21.04	2.73	12.11	0	7.21	0	0	0	3.62	0	3.4	7.77	11.64	7.69	0	0	0	0	0	8.87	0	0	0	0	0	0	0	0
CCDC66	7.86	0	8.22	0	1.86	0	0	0	0	0	0	0	0	4.6	0	7.58	0	15.7	3.37	0	0	13.39	27.28	20.19	0	0	3.06	0	0	23.55	0	3.4	5.18	9.7	12.81	0	0	0	0	0	23.65	0	0	0	0	0	27.4	0	3.5
DACT2	12.23	0	4.93	0	0	2.5	1.88	0	0	0	11.33	0	0	0	9.39	17.7	0	0	26.96	0	0	1.91	38.2	0	0	0	0	0	25.73	30.79	0	0	2.59	32.99	7.69	0	3.07	0	0	0	0	0	0	0	0	9.69	0	0	0
KLHL18	7.86	0	4.93	0	1.86	2.5	9.38	6.03	0	0	1.13	0	22.85	0	9.39	10.11	0	0	23.59	2.58	0	0	2.73	0	14.41	0	3.06	0	0	16.3	0	6.8	15.54	7.76	7.69	0	0	0	10.01	0	0	0	0	0	3.23	16.96	12.79	0	0
TM7SF3	4.37	13.25	0	0	0	0	0	12.07	0	0	0	0	0	0	9.39	7.58	0	0	6.74	7.73	0	0	2.73	0	0	2.4	0	0	17.15	23.55	0	0	10.36	1.94	5.13	0	0	0	0	0	11.82	3.81	3.81	0	0	0	36.53	0	0
SPATA13	6.99	0	4.93	0	16.75	12.51	0	4.83	0	0	0	0	0	6.91	4.7	0	0	7.85	23.59	0	0	13.39	0	0	2.4	0	0	0	8.58	3.62	0	20.4	23.3	9.7	12.81	0	0	61.77	0	0	0	0	15.23	0	0	4.85	0	0	0
LMBR1	3.49	0	16.45	0	3.72	7.5	9.38	2.41	0	0	12.47	0	0	0	14.09	12.64	0	0	50.55	5.15	16.8	0	0	16.15	0	2.4	0	0	0	21.74	0	3.4	12.95	17.46	5.13	0	0	0	20.02	0	11.82	0	0	0	0	0	1.83	0	0
SPA17	0	18.55	8.22	0	24.2	22.51	11.26	13.27	0	0	0	0	22.85	0	4.7	12.64	0	0	0	0	0	1.91	24.56	8.08	0	24.04	0	0	0	7.25	0	3.4	18.12	7.76	7.69	0	0	0	0	0	0	0	0	0	0	0	1.83	0	0
SAMD9L	3.49	0	8.22	0	7.44	0	0	0	0	23.12	0	0	0	11.51	42.26	17.7	0	0	0	3.86	0	0	8.19	0	0	0	0	0	8.58	16.3	0	10.2	10.36	11.64	20.5	0	0	0	0	0	0	0	0	8.49	0	0	23.75	3.42	0
GTF3C1	13.98	0	1.64	0	0	0	7.51	4.83	0	0	6.8	0	0	4.6	9.39	10.11	0	0	13.48	5.15	0	1.91	2.73	0	14.41	0	9.19	0	0	18.11	0	0	28.48	3.88	12.81	0	0	0	0	19.95	14.78	0	0	0	0	0	0	27.39	14.01
POT1	7.86	0	0	0	18.61	12.51	28.15	10.86	0	0	15.87	0	0	9.21	0	5.06	0	0	13.48	0	0	13.39	5.46	0	0	2.4	0	0	8.58	7.25	0	0	0	3.88	2.56	0	0	0	20.02	0	0	0	11.43	12.73	0	55.74	3.65	0	0
VCPIP1	8.73	0	1.64	0	5.58	0	0	7.24	0	0	2.27	0	8.57	4.6	9.39	2.53	0	15.7	3.37	14.16	0	21.04	16.37	4.04	24.02	2.4	3.06	0	0	14.49	0	0	15.54	3.88	2.56	3.83	0	0	0	0	0	22.87	0	21.21	32.34	0	5.48	6.85	3.5
POLG2	6.99	2.65	1.64	0	13.03	2.5	18.77	0	12.45	0	12.47	47.17	0	2.3	4.7	5.06	0	0	10.11	1.29	0	5.74	10.91	0	0	0	0	0	0	5.43	0	0	5.18	5.82	15.38	0	3.07	0	0	0	2.96	0	0	0	0	14.54	1.83	0	0
POMT2	0.87	0	0	0	0	10.01	0	0	49.79	34.69	1.13	0	0	0	23.48	5.06	0	0	16.85	0	0	0	0	8.08	0	0	0	0	0	1.81	0	3.4	12.95	3.88	5.13	0	0	0	15.02	4.99	14.78	0	0	0	0	24.23	0	30.81	0
QSER1	13.1	0	1.64	0	3.72	0	0	0	0	0	10.2	0	0	25.32	0	10.11	0	0	0	3.86	0	1.91	0	0	0	0	0	0	25.73	14.49	0	0	25.89	34.93	2.56	0	0	0	0	0	0	0	0	0	0	4.85	18.27	0	0
PGM2L1	3.49	0	0	0	3.72	2.5	16.89	4.83	0	0	0	0	0	0	4.7	10.11	0	0	57.29	0	0	0	0	4.04	0	9.62	0	0	0	10.87	0	3.4	18.12	0	12.81	57.51	39.93	2.57	0	0	0	0	0	0	0	0	0	0	0
MARK2	17.47	0	3.29	0	0	12.51	0	15.69	0	7.71	3.4	18.87	2.86	0	0	5.06	0	3.93	10.11	0	0	0	5.46	8.08	19.21	0	0	0	0	21.74	0	0	31.07	9.7	12.81	0	0	25.74	0	0	0	0	0	0	25.87	2.42	0	0	3.5
ARHGAP17	7.86	2.65	9.87	0	14.89	0	1.88	1.21	0	0	0	0	5.71	0	4.7	20.23	0	27.48	3.37	0	0	1.91	0	0	0	0	0	0	77.2	18.11	0	0	12.95	5.82	5.13	0	3.07	0	0	0	0	15.24	0	0	0	0	1.83	0	0
CCNB1IP1	5.24	15.9	3.29	0	7.44	0	0	8.45	0	0	11.33	0	2.86	0	4.7	7.58	0	0	6.74	3.86	0	0	0	12.11	9.61	0	0	0	0	10.87	0	17	10.36	5.82	0	0	0	2.57	0	0	20.69	0	0	16.97	0	29.08	20.09	0	0
WDR44	2.62	0	6.58	0	1.86	12.51	22.52	2.41	0	0	0	0	2.86	6.91	14.09	2.53	0	0	30.33	9.01	0	26.78	2.73	0	0	12.02	0	0	0	16.3	0	3.4	5.18	7.76	5.13	3.83	36.86	0	0	0	0	7.62	0	0	0	0	0	27.39	17.51
FBXO4	8.73	18.55	4.93	0	0	0	0	15.69	0	26.98	3.4	0	11.42	20.72	0	7.58	0	3.93	10.11	0	0	0	38.2	0	7.21	0	0	0	17.15	0	0	6.8	2.59	1.94	0	0	3.07	0	0	0	0	0	0	4.24	0	0	0	41.08	35.02
RAPH1	0	2.65	8.22	0	1.86	22.51	11.26	0	0	0	3.4	9.43	0	6.91	18.78	0	0	3.93	23.59	6.44	0	11.48	0	8.08	0	2.4	6.13	0	0	21.74	0	3.4	5.18	9.7	2.56	0	0	0	0	0	0	22.87	0	12.73	22.64	0	0	3.42	24.51
POC5	3.49	0	6.58	0	14.89	2.5	0	0	0	3.85	3.4	0	0	0	0	2.53	0	0	6.74	1.29	0	5.74	19.1	0	0	0	0	0	0	12.68	0	13.6	0	11.64	20.5	30.67	0	0	0	0	17.74	15.24	15.23	21.21	0	0	7.31	27.39	0
ZBTB11	9.61	2.65	4.93	0	1.86	0	0	25.34	0	0	0	66.04	8.57	0	9.39	10.11	0	15.7	13.48	0	4.2	0	0	4.04	0	0	0	0	0	9.06	0	10.2	10.36	13.58	2.56	0	0	0	0	0	0	0	0	0	0	4.85	5.48	0	0
CHST12	22.71	0	6.58	0	0	0	3.75	6.03	0	0	12.47	0	0	9.21	9.39	5.06	0	0	3.37	16.74	0	24.86	0	0	9.61	0	0	0	0	0	0	6.8	18.12	3.88	2.56	0	0	5.15	0	4.99	0	0	0	0	61.45	12.12	5.48	3.42	0
LNX2	21.84	0	8.22	0	1.86	15.01	18.77	4.83	0	0	0	0	0	11.51	18.78	12.64	0	0	6.74	0	0	0	0	8.08	0	24.04	0	0	0	30.79	0	0	7.77	23.29	2.56	3.83	27.64	0	0	0	0	3.81	0	8.49	0	0	0	0	0
CARNMT1	12.23	0	13.16	0	26.06	30.02	0	3.62	0	0	0	0	0	0	23.48	7.58	0	0	23.59	0	8.4	17.21	0	4.04	9.61	9.62	0	0	0	25.36	0	6.8	5.18	25.23	0	0	0	0	0	0	0	0	0	0	0	0	0	0	0
NCOA2	13.98	0	16.45	0	1.86	10.01	0	3.62	24.9	15.42	0	0	17.13	0	4.7	20.23	0	0	13.48	2.58	4.2	0	8.19	16.15	0	0	0	0	0	27.17	0	3.4	10.36	21.35	10.25	0	0	0	0	0	0	0	0	4.24	0	0	0	0	24.51
PIFO	0	0	0	0	1.86	2.5	0	0	0	0	0	0	0	0	0	2.53	0	0	0	0	0	0	0	0	0	0	0	0	0	9.06	0	0	0	5.82	0	0	0	30.88	40.05	0	0	0	0	0	3.23	0	0	13.69	0
SPG7	0.87	2.65	0	0	0	5	0	7.24	0	0	2.27	0	8.57	6.91	18.78	15.17	0	3.93	16.85	2.58	0	0	5.46	0	0	31.25	9.19	0	8.58	10.87	0	10.2	20.71	17.46	12.81	0	0	0	0	0	0	0	0	0	0	41.2	10.96	0	0
PPARA	6.99	0	9.87	0	0	0	0	0	0	0	3.4	0	0	4.6	0	5.06	0	0	23.59	14.16	16.8	0	24.56	0	0	0	0	0	25.73	23.55	0	0	18.12	32.99	5.13	23	0	0	0	0	0	0	0	16.97	0	0	0	0	0
SORT1	1.75	2.65	0	0	0	0	0	1.21	0	15.42	4.53	0	2.86	0	9.39	30.34	0	3.93	10.11	1.29	0	0	19.1	0	0	0	0	0	8.58	12.68	0	0	0	9.7	0	0	0	54.05	0	19.95	32.52	0	0	0	0	33.93	0	0	0
CMTM8	0	0	0	0	9.31	2.5	1.88	10.86	62.24	0	4.53	0	0	9.21	9.39	7.58	0	3.93	16.85	39.92	0	0	10.91	12.11	19.21	0	0	0	0	12.68	0	0	0	21.35	7.69	0	0	0	0	0	0	0	3.81	0	0	0	0	0	10.5
ATP2B4	2.62	13.25	0	0	0	20.01	0	1.21	0	3.85	2.27	0	11.42	0	14.09	5.06	0	0	6.74	14.16	0	0	8.19	0	0	0	9.19	0	0	14.49	0	0	0	13.58	10.25	0	0	0	45.05	0	0	3.81	11.43	0	0	0	0	0	35.02
DIP2C	4.37	0	4.93	0	0	0	0	3.62	0	23.12	6.8	0	0	0	0	12.64	0	0	20.22	0	0	11.48	0	0	0	0	0	0	0	10.87	0	0	2.59	5.82	2.56	0	6.14	0	0	9.97	0	0	0	4.24	0	2.42	0	23.96	59.53
DNTTIP1	4.37	0	11.51	0	9.31	0	0	13.27	0	7.71	0	0	0	0	4.7	5.06	0	0	3.37	0	29.4	0	27.28	4.04	31.22	0	0	0	8.58	7.25	0	0	12.95	3.88	12.81	0	0	0	0	0	0	0	0	0	0	0	23.75	0	0
EFCAB11	13.98	21.19	14.8	0	7.44	20.01	13.14	1.21	0	0	0	0	0	13.81	4.7	7.58	0	0	10.11	5.15	8.4	3.83	0	0	9.61	0	0	0	0	1.81	0	6.8	18.12	23.29	30.75	0	0	0	0	0	0	0	3.81	0	0	0	0	0	14.01
UBAC1	1.75	18.55	3.29	0	9.31	0	0	0	0	0	5.67	0	0	4.6	14.09	7.58	0	0	6.74	1.29	4.2	5.74	0	0	19.21	4.81	27.57	0	0	19.92	0	6.8	18.12	7.76	2.56	0	0	2.57	0	0	0	3.81	0	0	35.57	0	0	0	0
SLC31A2	6.11	0	23.03	0	0	7.5	0	0	0	0	0	9.43	0	0	4.7	5.06	0	0	16.85	0	12.6	0	8.19	0	16.81	0	0	0	0	0	0	3.4	0	0	28.19	23	0	0	25.03	14.96	0	0	3.81	0	0	0	0	0	0
TDRD3	0.87	0	1.64	0	20.47	5	0	9.65	0	0	13.6	47.17	0	2.3	9.39	17.7	0	3.93	3.37	0	4.2	0	0	0	0	9.62	0	0	0	10.87	0	0	10.36	21.35	0	15.34	6.14	0	0	24.93	0	19.05	0	0	0	0	0	0	0
INTU	2.62	0	13.16	0	11.17	10.01	0	24.13	0	23.12	0	9.43	14.28	4.6	4.7	12.64	0	3.93	13.48	1.29	0	17.21	27.28	0	21.62	0	0	0	17.15	3.62	0	3.4	2.59	9.7	2.56	0	0	0	0	0	0	0	0	0	0	0	0	0	0
MTOR	3.49	0	13.16	0	0	2.5	13.14	1.21	0	3.85	6.8	0	0	0	9.39	2.53	0	0	3.37	0	21	21.04	0	0	21.62	0	0	0	0	19.92	0	3.4	41.43	13.58	0	0	0	5.15	0	39.89	0	3.81	7.62	0	0	0	0	0	14.01
SHQ1	4.37	7.95	3.29	0	5.58	5	5.63	8.45	0	0	5.67	0	0	0	0	2.53	0	0	0	12.88	0	7.65	24.56	4.04	9.61	9.62	24.51	0	0	14.49	0	6.8	5.18	5.82	7.69	0	6.14	0	0	0	23.65	11.43	0	0	16.17	0	0	0	0
SAMD4B	14.85	2.65	0	0	5.58	12.51	7.51	7.24	0	0	6.8	0	0	0	4.7	2.53	0	0	13.48	16.74	0	28.69	10.91	0	7.21	0	30.64	0	0	18.11	0	3.4	5.18	13.58	5.13	0	0	0	0	0	0	0	0	67.89	0	0	16.44	0	0
UBR3	14.85	0	1.64	0	0	17.51	0	0	0	0	0	0	0	4.6	9.39	10.11	0	0	23.59	11.59	0	7.65	5.46	4.04	0	2.4	0	0	0	18.11	0	0	15.54	21.35	7.69	0	15.36	28.31	0	4.99	38.43	0	0	0	0	0	0	0	3.5
DOPEY2	7.86	13.25	13.16	0	5.58	2.5	15.01	8.45	0	0	2.27	0	8.57	2.3	0	17.7	0	0	3.37	5.15	0	1.91	13.64	12.11	0	52.89	12.25	0	0	30.79	0	0	18.12	25.23	0	0	0	30.88	0	0	0	0	0	4.24	9.7	0	0	0	0
ACO1	10.48	0	3.29	0	3.72	7.5	7.51	20.51	0	0	7.93	0	2.86	25.32	4.7	10.11	0	3.93	6.74	7.73	0	5.74	2.73	4.04	0	0	3.06	0	8.58	14.49	0	6.8	5.18	21.35	5.13	0	0	0	0	0	0	0	0	0	0	0	0	0	3.5
RIPK1	6.11	13.25	0	0	3.72	5	7.51	7.24	0	0	0	9.43	0	4.6	14.09	10.11	0	0	20.22	11.59	8.4	0	0	0	0	7.21	9.19	0	0	10.87	0	10.2	18.12	19.41	10.25	0	0	0	20.02	0	0	0	0	33.94	0	2.42	0	0	0
RNF219	4.37	10.6	0	0	0	0	1.88	2.41	0	0	0	0	0	20.72	4.7	12.64	0	15.7	3.37	5.15	4.2	0	5.46	12.11	2.4	0	0	0	17.15	16.3	0	0	10.36	13.58	12.81	11.5	0	0	5.01	0	23.65	0	11.43	0	3.23	0	5.48	34.24	0
PANK2	9.61	15.9	8.22	0	0	5	0	4.83	0	3.85	3.4	0	5.71	11.51	9.39	2.53	0	7.85	16.85	12.88	0	0	0	0	0	14.42	0	0	25.73	12.68	0	13.6	28.48	19.41	7.69	0	0	0	0	0	0	26.68	0	0	0	0	0	0	0
ACP5	9.61	0	0	0	1.86	0	0	0	0	26.98	0	9.43	0	16.11	9.39	7.58	0	7.85	0	0	0	0	0	12.11	0	0	0	0	0	5.43	0	0	2.59	3.88	7.69	57.51	18.43	10.29	0	49.87	2.96	0	0	0	3.23	4.85	0	0	0
DUSP5	7.86	0	1.64	0	11.17	0	20.64	10.86	0	0	4.53	9.43	14.28	0	14.09	12.64	0	31.41	10.11	5.15	4.2	0	2.73	0	0	0	24.51	0	0	1.81	0	13.6	7.77	19.41	2.56	3.83	0	0	0	4.99	0	0	0	0	12.94	0	0	0	59.53
CLDN12	6.99	0	0	0	22.33	5	0	0	0	3.85	19.27	0	2.86	11.51	14.09	7.58	0	0	10.11	3.86	0	1.91	2.73	0	0	0	0	0	0	1.81	0	13.6	10.36	9.7	7.69	0	21.5	0	20.02	0	0	34.3	0	21.21	9.7	29.08	1.83	0	3.5
TMX4	5.24	18.55	9.87	0	5.58	0	0	0	0	0	4.53	9.43	0	13.81	0	10.11	0	7.85	6.74	18.03	0	0	0	12.11	12.01	0	0	0	42.89	21.74	0	3.4	5.18	19.41	5.13	0	0	0	0	0	20.69	0	0	0	0	0	0	0	56.03
LOC101927027	3.49	18.55	9.87	0	9.31	10.01	0	2.41	37.34	0	9.07	0	25.7	0	9.39	2.53	0	0	26.96	0	0	0	19.1	0	0	0	3.06	0	0	10.87	0	13.6	10.36	3.88	25.63	0	12.29	0	0	0	0	0	0	0	3.23	0	0	3.42	0
PPP3CC	10.48	0	9.87	0	5.58	5	18.77	0	0	7.71	0	9.43	11.42	0	18.78	5.06	0	15.7	0	5.15	0	0	0	0	0	21.64	3.06	0	0	25.36	0	0	5.18	21.35	0	0	0	2.57	5.01	4.99	0	26.68	0	0	0	2.42	1.83	0	45.52
TRIM71	9.61	29.14	6.58	0	0	0	9.38	0	0	0	0	0	0	13.81	14.09	7.58	0	11.78	23.59	25.75	0	0	0	0	4.8	0	36.76	0	17.15	21.74	0	0	12.95	13.58	7.69	0	0	0	0	0	0	0	0	0	0	0	0	0	0
STXBP1	9.61	0	0	0	13.03	0	0	7.24	0	3.85	30.6	0	0	0	14.09	10.11	0	0	13.48	1.29	0	0	2.73	8.08	0	0	21.45	0	8.58	18.11	0	0	5.18	13.58	7.69	30.67	0	0	0	0	11.82	30.49	0	0	0	55.74	0	0	0
CCNT1	0.87	0	4.93	0	0	7.5	13.14	0	62.24	0	10.2	0	0	0	9.39	20.23	0	0	13.48	24.47	0	11.48	0	0	0	0	9.19	0	8.58	36.23	0	3.4	5.18	17.46	7.69	15.34	0	0	0	0	2.96	0	0	8.49	0	19.39	27.4	0	0
ZNRF1	6.11	0	0	0	22.33	2.5	5.63	6.03	0	0	17	0	2.86	0	14.09	5.06	0	7.85	13.48	9.01	0	0	0	0	0	7.21	0	0	8.58	12.68	0	13.6	18.12	13.58	0	0	43	7.72	0	0	5.91	0	3.81	0	0	9.69	0	0	14.01
RP9P	0	0	13.16	0	13.03	0	0	1.21	0	38.54	0	0	0	0	18.78	27.81	0	7.85	3.37	0	0	0	0	0	0	0	0	0	0	47.09	0	0	5.18	7.76	0	26.84	27.64	2.57	0	0	5.91	0	0	0	0	0	56.63	0	0
UBN2	2.62	23.84	1.64	0	13.03	0	11.26	0	0	0	2.27	0	5.71	0	4.7	7.58	0	0	43.81	1.29	0	0	10.91	28.26	0	0	3.06	0	60.04	27.17	0	13.6	12.95	7.76	7.69	0	0	0	0	0	0	0	7.62	4.24	0	26.66	3.65	0	0
MICB	1.75	21.19	14.8	0	11.17	0	1.88	0	0	46.25	10.2	0	0	0	18.78	0	0	0	13.48	0	0	0	35.47	0	0	0	0	0	0	3.62	0	0	7.77	1.94	2.56	0	12.29	25.74	5.01	0	0	0	0	0	0	19.39	20.09	0	0
TRIM5	6.99	0	4.93	0	3.72	12.51	0	14.48	0	26.98	0	0	5.71	0	0	12.64	0	3.93	37.07	1.29	16.8	0	8.19	0	9.61	0	0	0	0	23.55	0	10.2	10.36	9.7	5.13	0	0	0	0	0	0	0	0	0	19.4	12.12	58.45	0	10.5
MRAS	2.62	0	0	0	26.06	7.5	0	0	0	0	11.33	0	0	0	23.48	15.17	0	15.7	50.55	0	0	0	16.37	0	14.41	4.81	3.06	0	0	7.25	0	17	36.25	3.88	23.06	0	18.43	0	10.01	0	0	0	15.23	0	0	4.85	0	0	0
C19orf12	0.87	5.3	3.29	0	0	5	0	12.07	0	0	14.73	37.74	0	6.91	14.09	15.17	0	0	16.85	10.3	0	0	0	12.11	33.63	4.81	3.06	0	17.15	23.55	0	3.4	5.18	29.11	0	0	0	0	0	0	0	0	0	0	0	2.42	0	0	0
GIT1	8.73	18.55	9.87	0	9.31	15.01	24.4	3.62	0	0	1.13	0	2.86	2.3	4.7	5.06	0	0	3.37	34.77	0	0	0	0	2.4	2.4	18.38	0	0	18.11	0	0	15.54	11.64	2.56	0	3.07	0	5.01	0	0	0	19.04	0	0	0	3.65	0	17.51
C12orf73	8.73	0	14.8	0	13.03	15.01	0	8.45	0	7.71	35.13	0	5.71	11.51	9.39	15.17	0	0	13.48	1.29	16.8	0	2.73	0	0	0	0	0	0	12.68	0	17	0	9.7	2.56	0	0	0	0	0	17.74	0	57.13	0	0	7.27	0	0	0
KDM3B	6.11	0	0	0	0	7.5	20.64	4.83	0	23.12	21.53	0	8.57	18.41	14.09	10.11	0	7.85	13.48	10.3	8.4	3.83	0	4.04	0	0	0	0	0	10.87	0	0	18.12	23.29	7.69	19.17	0	0	0	0	0	0	3.81	25.46	3.23	19.39	1.83	27.39	0
GXYLT1	0	0	16.45	0	0	2.5	0	1.21	12.45	0	11.33	0	0	0	9.39	12.64	0	43.18	26.96	14.16	0	0	2.73	0	0	0	15.32	0	0	36.23	0	6.8	5.18	44.63	7.69	0	0	2.57	0	0	14.78	0	0	0	0	0	1.83	0	0
HCFC1	21.84	21.19	0	0	9.31	12.51	0	7.24	0	34.69	5.67	9.43	8.57	2.3	4.7	10.11	0	3.93	6.74	10.3	0	0	8.19	0	0	2.4	0	0	0	10.87	0	0	12.95	9.7	10.25	0	0	0	5.01	0	0	0	22.85	0	22.64	12.12	9.13	0	0
RBSN	5.24	7.95	1.64	0	7.44	0	16.89	12.07	0	0	0	0	14.28	13.81	4.7	17.7	0	3.93	3.37	12.88	0	5.74	0	12.11	2.4	12.02	3.06	0	8.58	14.49	0	0	18.12	9.7	7.69	0	9.21	0	0	0	11.82	38.11	60.94	8.49	0	0	0	0	0
RAB3D	9.61	26.49	1.64	0	3.72	0	3.75	2.41	0	50.1	20.4	0	11.42	11.51	0	5.06	0	0	0	0	0	1.91	0	0	0	9.62	33.7	0	8.58	21.74	0	0	10.36	3.88	0	0	0	2.57	0	0	2.96	0	0	0	35.57	9.69	0	0	0
UBE2M	13.98	21.19	34.54	0	1.86	7.5	9.38	13.27	0	0	7.93	0	0	4.6	14.09	10.11	0	3.93	26.96	1.29	0	1.91	8.19	0	2.4	0	0	0	0	18.11	0	3.4	33.66	13.58	7.69	0	0	0	0	0	8.87	0	0	16.97	0	9.69	1.83	0	0
GJC1	5.24	18.55	1.64	0	1.86	0	0	8.45	0	0	15.87	9.43	22.85	0	0	0	0	19.63	13.48	15.45	4.2	1.91	46.38	0	0	7.21	0	0	0	19.92	0	0	12.95	11.64	5.13	0	3.07	0	0	0	8.87	0	0	21.21	0	0	0	0	21.01
ZNF268	8.73	0	3.29	0	5.58	5	0	9.65	0	0	0	0	11.42	4.6	23.48	10.11	0	0	0	7.73	0	7.65	0	8.08	0	0	0	0	0	12.68	0	3.4	15.54	11.64	5.13	0	21.5	2.57	0	0	0	11.43	19.04	12.73	0	0	25.57	0	0
SIX5	14.85	0	1.64	0	3.72	7.5	0	2.41	0	0	7.93	18.87	2.86	27.62	18.78	7.58	0	0	16.85	2.58	0	11.48	0	8.08	16.81	0	42.89	0	0	9.06	0	0	20.71	5.82	2.56	0	3.07	0	5.01	0	14.78	7.62	15.23	8.49	22.64	0	0	3.42	0
ZNF746	3.49	0	1.64	0	0	20.01	0	1.21	24.9	19.27	6.8	0	0	23.02	4.7	7.58	0	0	0	0	4.2	19.13	0	0	12.01	0	15.32	0	0	25.36	0	6.8	18.12	9.7	5.13	0	0	0	0	49.87	0	0	0	8.49	0	0	14.61	0	0
PMS2P1	6.99	2.65	6.58	0	0	0	0	0	24.9	0	6.8	0	8.57	2.3	14.09	15.17	0	11.78	6.74	18.03	0	7.65	21.83	0	4.8	0	6.13	0	0	7.25	0	3.4	0	5.82	12.81	0	30.71	36.03	0	14.96	5.91	0	0	4.24	25.87	7.27	0	0	0
ZNF232	0	0	0	0	13.03	0	0	0	37.34	0	26.07	0	0	0	9.39	5.06	0	0	0	0	0	3.83	0	0	0	0	0	0	0	0	0	3.4	0	1.94	2.56	61.34	0	54.05	0	0	0	0	0	0	0	2.42	21.92	0	0
ANKHD1	9.61	0	0	0	3.72	0	0	3.62	0	3.85	11.33	18.87	8.57	6.91	9.39	10.11	0	3.93	6.74	2.58	0	1.91	0	0	0	16.83	0	0	8.58	3.62	0	3.4	12.95	15.52	7.69	15.34	0	0	0	0	14.78	0	0	4.24	0	21.81	10.96	0	0
MTMR1	18.34	2.65	3.29	0	7.44	2.5	0	4.83	0	3.85	0	0	0	18.41	14.09	2.53	0	7.85	23.59	0	0	0	8.19	8.08	19.21	0	0	0	0	25.36	0	6.8	10.36	19.41	0	0	0	0	15.02	0	0	0	0	8.49	0	12.12	1.83	37.66	0
FASN	2.62	2.65	3.29	0	16.75	0	11.26	9.65	0	7.71	4.53	0	11.42	13.81	18.78	27.81	0	0	20.22	12.88	4.2	0	0	0	2.4	38.47	0	0	0	16.3	0	0	10.36	9.7	7.69	0	15.36	0	0	0	0	7.62	0	0	0	0	0	0	0
ST3GAL1	3.49	5.3	6.58	0	0	10.01	0	25.34	0	0	20.4	0	25.7	2.3	0	5.06	0	0	6.74	10.3	0	0	0	16.15	0	0	0	0	0	9.06	0	0	25.89	0	0	3.83	0	0	0	0	8.87	38.11	0	12.73	0	55.74	23.75	0	42.02
PLD1	10.48	5.3	1.64	0	0	12.51	16.89	21.72	0	15.42	23.8	0	8.57	0	4.7	0	0	0	0	3.86	0	19.13	0	16.15	4.8	2.4	0	0	25.73	14.49	0	3.4	15.54	29.11	10.25	0	3.07	23.16	0	0	5.91	0	0	0	0	0	0	23.96	0
SEH1L	0.87	0	6.58	0	7.44	0	28.15	9.65	0	0	15.87	0	2.86	23.02	4.7	7.58	0	0	33.7	0	0	9.56	16.37	8.08	0	0	0	0	0	7.25	0	3.4	7.77	3.88	2.56	0	0	23.16	95.11	0	11.82	15.24	0	0	0	0	0	0	0
ECHDC2	8.73	0	9.87	0	7.44	0	1.88	13.27	0	0	6.8	0	19.99	0	0	2.53	0	7.85	10.11	3.86	54.6	3.83	10.91	4.04	36.03	0	3.06	0	0	1.81	0	10.2	2.59	5.82	12.81	34.51	21.5	30.88	0	4.99	2.96	19.05	0	0	0	0	0	0	0
DIS3L	0	0	1.64	0	0	2.5	0	7.24	0	0	2.27	28.3	0	4.6	0	15.17	0	0	6.74	0	0	3.83	0	4.04	0	4.81	0	0	0	7.25	0	3.4	5.18	3.88	0	15.34	0	5.15	0	54.85	0	3.81	3.81	0	19.4	0	18.27	0	0
LRRC8B	11.36	0	19.74	0	1.86	10.01	0	14.48	0	0	21.53	9.43	2.86	0	4.7	5.06	0	19.63	13.48	6.44	0	1.91	35.47	0	7.21	0	0	0	0	7.25	0	0	54.37	21.35	0	0	3.07	0	0	0	0	0	0	0	0	0	0	0	0
MAPK14	6.99	10.6	8.22	0	7.44	15.01	0	0	0	0	0	28.3	5.71	2.3	14.09	12.64	0	0	30.33	6.44	0	17.21	0	0	9.61	0	9.19	0	0	21.74	0	10.2	33.66	11.64	12.81	0	0	0	0	0	0	0	0	0	29.11	16.96	0	20.54	0
CNST	1.75	2.65	9.87	0	1.86	0	0	25.34	0	3.85	0	9.43	11.42	0	9.39	17.7	0	0	6.74	11.59	4.2	0	0	12.11	0	0	9.19	0	0	32.6	0	10.2	33.66	15.52	7.69	15.34	0	0	0	0	2.96	11.43	0	0	0	4.85	5.48	47.93	0
SLC35D2	18.34	2.65	3.29	0	5.58	22.51	0	15.69	0	0	1.13	0	0	2.3	4.7	10.11	0	19.63	10.11	27.04	0	3.83	0	16.15	31.22	4.81	0	0	0	21.74	0	6.8	15.54	21.35	7.69	0	0	0	0	0	0	0	0	0	0	0	0	3.42	7
ARMC9	10.48	0	9.87	0	14.89	0	0	37.4	0	3.85	1.13	0	0	0	0	20.23	0	15.7	6.74	20.6	0	3.83	16.37	0	0	0	0	0	0	9.06	0	6.8	5.18	1.94	15.38	0	0	30.88	0	34.91	29.56	0	0	0	0	2.42	21.92	0	0
MSANTD3	4.37	0	19.74	0	29.78	0	15.01	7.24	0	0	32.87	0	17.13	0	14.09	15.17	0	3.93	10.11	0	0	0	10.91	0	0	4.81	0	0	0	14.49	0	6.8	7.77	11.64	7.69	0	0	0	0	0	0	0	22.85	0	0	0	10.96	0	45.52
LRRC42	13.1	10.6	4.93	0	11.17	27.52	20.64	22.93	0	19.27	11.33	9.43	2.86	4.6	0	27.81	0	0	30.33	5.15	0	5.74	10.91	4.04	0	0	18.38	0	0	5.43	0	0	10.36	5.82	20.5	26.84	0	0	0	4.99	0	0	0	0	9.7	0	0	0	14.01
RPS6KA1	13.1	0	6.58	0	9.31	15.01	22.52	0	0	7.71	7.93	0	22.85	11.51	4.7	0	0	7.85	10.11	0	0	0	0	0	14.41	0	6.13	0	0	12.68	0	6.8	7.77	3.88	2.56	0	0	28.31	0	44.88	0	0	0	8.49	0	0	0	0	0
CHST14	12.23	5.3	1.64	0	0	22.51	0	2.41	0	0	1.13	18.87	11.42	0	18.78	15.17	0	0	30.33	3.86	0	0	0	0	0	0	0	0	8.58	14.49	0	3.4	33.66	36.87	7.69	0	0	0	0	0	0	0	0	0	6.47	14.54	7.31	0	0
HERC6	0	0	4.93	0	1.86	30.02	0	3.62	0	0	0	0	2.86	2.3	18.78	22.75	0	0	23.59	18.03	0	22.95	19.1	0	19.21	0	3.06	0	8.58	5.43	0	10.2	10.36	17.46	15.38	26.84	3.07	18.02	0	0	2.96	0	3.81	0	0	0	47.49	0	0
ERAP1	5.24	2.65	0	0	3.72	0	9.38	7.24	0	0	5.67	0	8.57	0	9.39	12.64	0	3.93	3.37	21.89	0	26.78	27.28	8.08	2.4	0	6.13	0	8.58	14.49	0	13.6	20.71	15.52	2.56	7.67	0	2.57	0	14.96	0	7.62	3.81	0	12.94	0	9.13	0	0
ZNF12	8.73	0	3.29	0	0	0	0	1.21	0	0	6.8	47.17	11.42	4.6	28.18	17.7	0	0	13.48	2.58	0	17.21	0	0	16.81	0	64.34	0	0	16.3	0	0	25.89	17.46	2.56	0	0	23.16	0	0	0	0	0	0	22.64	0	3.65	0	14.01
NPRL3	17.47	0	1.64	0	13.03	2.5	11.26	0	0	3.85	13.6	28.3	2.86	2.3	9.39	10.11	0	3.93	6.74	9.01	0	7.65	19.1	0	14.41	0	0	0	0	18.11	0	13.6	2.59	5.82	7.69	0	21.5	0	0	0	0	3.81	3.81	0	0	9.69	10.96	10.27	14.01
ANGPT1	6.11	0	9.87	0	0	12.51	28.15	0	0	0	10.2	66.04	0	0	4.7	20.23	0	0	6.74	0	0	0	24.56	0	45.64	0	6.13	0	0	3.62	0	3.4	7.77	7.76	17.94	0	0	10.29	0	0	26.61	0	0	0	0	0	10.96	0	38.52
SPAG1	7.86	13.25	9.87	0	5.58	15.01	7.51	15.69	0	0	11.33	47.17	0	2.3	14.09	0	0	0	40.44	7.73	12.6	11.48	0	0	24.02	2.4	0	0	0	1.81	0	23.8	28.48	11.64	7.69	0	0	5.15	0	0	2.96	3.81	0	0	3.23	0	0	0	0
SOWAHD	6.99	5.3	1.64	0	3.72	15.01	46.92	8.45	0	0	1.13	9.43	17.13	4.6	18.78	5.06	0	0	16.85	3.86	0	5.74	0	0	0	0	0	0	0	1.81	0	3.4	36.25	5.82	2.56	0	9.21	2.57	0	0	0	0	0	29.7	0	0	10.96	0	10.5
POFUT1	4.37	7.95	1.64	0	16.75	5	7.51	22.93	0	0	13.6	0	37.12	0	14.09	12.64	0	0	10.11	18.03	0	7.65	0	0	4.8	4.81	3.06	0	0	7.25	0	34	7.77	21.35	17.94	15.34	9.21	0	0	4.99	0	0	0	21.21	0	9.69	9.13	0	0
TRMT44	16.6	0	1.64	0	3.72	0	11.26	10.86	0	0	9.07	0	22.85	0	4.7	12.64	0	0	6.74	9.01	0	24.86	0	28.26	31.22	28.85	9.19	0	25.73	19.92	0	13.6	5.18	11.64	12.81	0	0	36.03	0	0	0	0	0	0	32.34	0	1.83	0	0
TANC2	7.86	2.65	0	0	1.86	15.01	3.75	0	0	0	14.73	0	2.86	0	18.78	12.64	0	0	16.85	0	0	0	0	24.23	9.61	26.45	0	0	0	28.98	0	0	23.3	25.23	10.25	0	0	12.87	0	0	0	0	0	0	12.94	4.85	0	61.62	0
PKN1	10.48	0	3.29	0	7.44	2.5	7.51	3.62	0	0	0	0	8.57	2.3	0	7.58	0	0	3.37	6.44	0	9.56	35.47	0	7.21	0	15.32	0	0	5.43	0	17	31.07	19.41	12.81	0	0	10.29	0	4.99	0	7.62	22.85	0	25.87	7.27	32.88	0	14.01
SMARCAD1	13.1	0	11.51	0	13.03	0	3.75	24.13	0	7.71	2.27	0	0	0	23.48	27.81	0	0	16.85	2.58	0	15.3	0	12.11	31.22	0	0	0	0	9.06	0	3.4	20.71	23.29	12.81	34.51	43	0	0	0	5.91	3.81	0	0	0	0	0	20.54	7
SEPHS2	6.99	29.14	29.6	0	16.75	0	39.41	4.83	0	0	0	0	11.42	2.3	9.39	7.58	0	0	20.22	2.58	0	0	0	4.04	0	7.21	0	0	17.15	9.06	0	27.2	18.12	11.64	0	0	0	0	0	0	0	0	0	0	16.17	0	0	0	0
PCYT1A	1.75	18.55	0	0	1.86	5	5.63	10.86	0	0	3.4	0	28.56	0	4.7	12.64	0	0	6.74	14.16	0	0	19.1	20.19	0	4.81	0	0	8.58	3.62	0	3.4	33.66	21.35	10.25	0	15.36	0	0	0	62.08	0	0	0	0	0	0	0	24.51
ZYG11B	0	0	6.58	0	0	22.51	15.01	2.41	0	0	32.87	28.3	2.86	4.6	14.09	10.11	0	0	10.11	0	0	0	19.1	0	2.4	0	0	0	0	12.68	0	17	41.43	15.52	17.94	0	0	15.44	0	0	0	7.62	15.23	0	6.47	41.2	0	0	0
FAM220A	5.24	18.55	1.64	0	27.92	7.5	5.63	1.21	0	23.12	4.53	9.43	8.57	9.21	4.7	22.75	0	7.85	13.48	0	0	17.21	24.56	0	12.01	0	0	0	0	16.3	0	3.4	20.71	29.11	5.13	23	0	0	0	0	2.96	0	0	0	0	0	25.57	0	17.51
CREBBP	6.99	2.65	0	0	9.31	7.5	0	9.65	0	0	0	18.87	11.42	0	9.39	20.23	0	0	50.55	0	8.4	0	0	8.08	2.4	2.4	3.06	0	0	16.3	0	13.6	33.66	31.05	17.94	7.67	0	0	0	4.99	0	0	0	0	0	0	56.63	0	0
KIAA1217	24.46	7.95	0	0	14.89	35.02	0	4.83	0	0	4.53	0	8.57	0	4.7	10.11	0	0	30.33	3.86	0	0	0	0	0	0	6.13	0	0	19.92	0	6.8	36.25	27.17	15.38	3.83	0	33.46	0	4.99	0	0	0	0	0	0	0	0	0
POLK	5.24	0	18.09	0	0	0	1.88	0	24.9	3.85	6.8	9.43	11.42	9.21	4.7	10.11	0	0	13.48	3.86	0	5.74	2.73	0	28.82	14.42	0	0	8.58	14.49	0	3.4	10.36	15.52	10.25	0	0	7.72	0	0	0	0	7.62	0	19.4	36.35	0	10.27	0
ICE1	4.37	0	6.58	0	0	0	0	31.37	0	0	1.13	0	0	0	0	15.17	0	0	20.22	0	0	1.91	16.37	40.38	9.61	21.64	21.45	0	0	34.41	0	6.8	15.54	17.46	12.81	0	18.43	0	0	0	0	0	3.81	25.46	0	0	1.83	0	70.03
VLDLR	4.37	2.65	8.22	0	5.58	12.51	0	6.03	24.9	11.56	11.33	9.43	2.86	2.3	0	15.17	0	15.7	13.48	1.29	4.2	7.65	5.46	36.34	4.8	0	0	0	0	36.23	0	0	12.95	13.58	10.25	0	0	0	20.02	0	0	41.92	0	0	3.23	0	0	23.96	0
RHOT1	6.11	0	0	0	0	0	16.89	13.27	0	0	1.13	0	19.99	9.21	9.39	17.7	0	0	23.59	0	0	0	8.19	8.08	4.8	0	9.19	0	25.73	19.92	0	6.8	12.95	7.76	7.69	0	0	0	0	0	14.78	7.62	19.04	25.46	0	9.69	0	0	3.5
RRP36	5.24	39.74	0	0	27.92	5	3.75	0	0	0	14.73	0	0	0	9.39	25.28	0	15.7	16.85	10.3	0	0	0	28.26	2.4	0	21.45	0	0	32.6	0	6.8	10.36	13.58	10.25	3.83	3.07	0	0	0	0	45.73	0	0	0	2.42	9.13	0	3.5
ZBTB41	6.99	0	0	0	0	0	7.51	1.21	0	0	18.13	9.43	14.28	0	4.7	0	0	0	33.7	0	0	3.83	2.73	4.04	0	16.83	18.38	0	0	7.25	0	6.8	12.95	21.35	15.38	49.84	24.57	0	0	0	8.87	0	7.62	4.24	12.94	2.42	27.4	0	28.01
ICE2	2.62	0	14.8	0	0	0	7.51	26.55	0	26.98	6.8	0	19.99	9.21	9.39	7.58	0	0	20.22	1.29	4.2	5.74	2.73	0	0	0	21.45	0	8.58	18.11	0	13.6	5.18	15.52	12.81	3.83	9.21	0	0	9.97	0	0	0	38.19	6.47	12.12	0	6.85	21.01
SP1	12.23	0	0	0	1.86	0	11.26	8.45	136.92	23.12	1.13	37.74	8.57	0	0	10.11	0	15.7	13.48	7.73	0	1.91	2.73	0	0	2.4	0	0	0	16.3	0	3.4	18.12	13.58	0	0	0	0	0	0	8.87	0	0	0	0	0	0	0	3.5
C12orf43	0.87	2.65	19.74	0	20.47	15.01	0	2.41	0	0	0	0	2.86	0	14.09	7.58	0	0	16.85	14.16	46.2	1.91	24.56	0	0	19.23	0	0	0	23.55	0	10.2	18.12	15.52	5.13	0	9.21	12.87	0	0	0	3.81	22.85	0	0	0	0	0	0
RRP8	12.23	42.39	6.58	0	0	5	30.03	6.03	0	26.98	4.53	0	0	9.21	0	15.17	0	7.85	3.37	19.31	0	0	51.84	0	0	0	9.19	0	0	10.87	0	6.8	18.12	7.76	0	3.83	0	0	0	0	2.96	0	0	25.46	19.4	0	0	17.12	0
AGPS	1.75	0	0	0	5.58	12.51	0	0	0	3.85	2.27	18.87	0	13.81	23.48	25.28	0	0	16.85	1.29	4.2	3.83	10.91	20.19	0	2.4	0	0	25.73	38.04	0	13.6	20.71	19.41	7.69	30.67	27.64	0	5.01	0	0	0	3.81	16.97	9.7	0	20.09	0	0
MEIS3P1	11.36	2.65	0	0	0	55.04	0	0	0	0	4.53	0	0	0	9.39	2.53	0	0	37.07	0	0	0	2.73	0	0	0	45.96	0	8.58	19.92	0	10.2	38.84	7.76	5.13	0	43	0	0	0	0	0	53.32	4.24	16.17	0	0	0	0
CCDC51	15.72	0	6.58	0	0	25.02	26.27	12.07	0	23.12	36.27	0	17.13	0	18.78	7.58	0	19.63	3.37	9.01	0	0	27.28	0	0	19.23	30.64	0	0	30.79	0	0	5.18	9.7	5.13	0	0	0	0	0	0	0	0	0	0	0	0	0	0
ARFGEF2	5.24	0	4.93	0	1.86	2.5	0	14.48	0	0	14.73	0	22.85	23.02	9.39	10.11	0	31.41	23.59	7.73	0	0	0	0	12.01	2.4	0	0	34.31	28.98	0	6.8	41.43	31.05	5.13	3.83	0	0	0	0	5.91	0	0	8.49	0	16.96	0	0	0
TIMM8A	4.37	10.6	13.16	0	27.92	2.5	0	14.48	0	0	19.27	66.04	22.85	16.11	18.78	7.58	0	3.93	6.74	16.74	0	3.83	0	36.34	2.4	2.4	0	0	17.15	18.11	0	3.4	10.36	3.88	7.69	0	15.36	0	0	0	17.74	0	0	0	0	0	7.31	0	0
RPGRIP1L	15.72	34.44	9.87	0	11.17	27.52	3.75	0	0	0	0	0	2.86	0	14.09	15.17	0	0	13.48	3.86	84	0	0	0	0	28.85	0	0	8.58	5.43	0	0	18.12	25.23	23.06	0	0	0	0	0	0	0	49.51	4.24	0	0	1.83	0	0
LAPTM4B	13.1	47.69	0	0	9.31	2.5	0	7.24	0	0	15.87	9.43	17.13	0	0	22.75	0	0	10.11	25.75	4.2	5.74	16.37	4.04	2.4	0	0	0	8.58	7.25	0	0	2.59	23.29	0	0	27.64	0	0	0	35.47	0	0	0	3.23	0	0	0	0
EEF1AKMT1	5.24	0	3.29	0	13.03	0	1.88	7.24	0	0	22.67	0	0	4.6	4.7	17.7	0	11.78	13.48	10.3	8.4	0	0	0	2.4	0	3.06	0	0	9.06	0	10.2	33.66	25.23	15.38	0	43	0	0	0	0	0	72.37	0	0	0	0	3.42	0
LOC100129034	6.11	0	8.22	0	0	22.51	35.66	14.48	0	34.69	1.13	28.3	14.28	0	14.09	10.11	0	19.63	6.74	2.58	63	0	19.1	16.15	0	0	0	0	25.73	9.06	0	0	18.12	3.88	0	0	3.07	0	0	4.99	2.96	11.43	0	4.24	9.7	0	0	3.42	3.5
CLDN14	3.49	2.65	3.29	0	0	0	11.26	0	0	0	12.47	0	0	0	9.39	15.17	0	23.55	13.48	0	16.8	0	35.47	12.11	21.62	7.21	0	0	8.58	5.43	0	6.8	10.36	9.7	0	0	43	0	0	4.99	0	0	0	0	9.7	0	14.61	0	10.5
PRUNE1	8.73	15.9	6.58	0	13.03	0	43.17	1.21	12.45	0	11.33	0	8.57	0	14.09	27.81	0	11.78	3.37	3.86	0	7.65	0	4.04	7.21	0	12.25	0	0	19.92	0	0	12.95	13.58	0	26.84	0	0	0	0	8.87	0	0	4.24	0	7.27	12.79	0	49.02
GRWD1	27.08	0	1.64	0	14.89	12.51	26.27	15.69	0	11.56	11.33	18.87	5.71	6.91	9.39	32.87	0	0	16.85	2.58	0	0	8.19	0	0	28.85	15.32	0	0	21.74	0	3.4	7.77	5.82	2.56	0	0	2.57	0	4.99	0	0	11.43	21.21	0	0	12.79	13.69	3.5
OGDH	17.47	5.3	4.93	0	7.44	5	1.88	13.27	0	0	3.4	0	2.86	6.91	18.78	22.75	0	0	23.59	10.3	0	1.91	2.73	28.26	0	7.21	6.13	0	0	16.3	0	3.4	5.18	13.58	10.25	0	0	5.15	0	0	0	34.3	15.23	0	3.23	12.12	0	0	42.02
GRAMD2	6.11	15.9	3.29	0	9.31	0	1.88	1.21	62.24	26.98	6.8	0	0	2.3	0	2.53	0	0	0	10.3	0	17.21	2.73	0	12.01	0	0	0	0	9.06	0	0	0	3.88	5.13	0	15.36	0	0	44.88	5.91	26.68	30.47	0	12.94	0	1.83	54.78	3.5
LMBRD2	8.73	5.3	19.74	0	0	12.51	0	4.83	0	0	22.67	0	0	6.91	0	5.06	0	7.85	13.48	15.45	29.4	3.83	0	0	0	2.4	6.13	0	0	14.49	0	6.8	25.89	11.64	23.06	0	0	0	0	0	53.21	0	15.23	16.97	0	0	0	0	0
GTPBP8	5.24	0	4.93	0	1.86	5	0	8.45	0	0	0	0	11.42	0	14.09	55.62	0	15.7	0	3.86	0	1.91	0	8.08	0	0	0	0	0	16.3	0	13.6	2.59	7.76	10.25	80.51	0	0	85.1	0	0	15.24	0	0	0	0	60.28	0	42.02
PNCK	3.49	2.65	1.64	0	7.44	2.5	3.75	3.62	0	3.85	1.13	9.43	0	13.81	4.7	0	0	0	0	0	0	0	0	4.04	0	0	27.57	0	0	0	0	3.4	0	5.82	2.56	3.83	12.29	0	5.01	0	5.91	19.05	7.62	8.49	38.81	33.93	0	0	73.53
RBM4B	32.32	7.95	11.51	0	7.44	0	5.63	16.89	0	0	10.2	0	8.57	9.21	18.78	12.64	0	3.93	6.74	21.89	0	3.83	2.73	0	4.8	0	21.45	0	8.58	10.87	0	6.8	0	11.64	25.63	0	3.07	25.74	0	0	0	15.24	0	0	0	12.12	29.23	0	28.01
PCOLCE2	33.19	0	0	0	0	15.01	0	12.07	0	0	0	9.43	11.42	29.92	0	0	0	0	3.37	0	8.4	7.65	0	0	0	0	0	0	8.58	0	0	3.4	0	11.64	2.56	11.5	0	0	10.01	0	26.61	0	0	0	93.79	4.85	1.83	0	0
COL16A1	20.09	5.3	6.58	0	1.86	0	0	20.51	0	0	12.47	0	5.71	0	0	2.53	0	15.7	6.74	7.73	0	28.69	0	16.15	0	0	64.34	0	8.58	16.3	0	6.8	36.25	15.52	5.13	0	67.57	0	0	0	20.69	0	0	0	6.47	0	9.13	0	0
TAF10	11.36	29.14	21.38	0	1.86	0	0	0	0	0	6.8	0	0	0	0	27.81	0	15.7	3.37	21.89	8.4	11.48	0	16.15	0	26.45	0	0	8.58	9.06	0	13.6	38.84	21.35	15.38	0	21.5	0	0	0	5.91	0	7.62	21.21	0	7.27	0	0	0
RNGTT	4.37	5.3	0	0	11.17	0	5.63	6.03	0	0	1.13	28.3	0	2.3	37.57	12.64	0	0	37.07	7.73	0	3.83	0	8.08	4.8	2.4	24.51	0	8.58	16.3	0	13.6	5.18	9.7	5.13	23	0	0	45.05	0	32.52	0	3.81	21.21	0	21.81	1.83	0	21.01
ADGRV1	22.71	10.6	0	0	31.64	12.51	11.26	50.68	0	0	44.2	0	11.42	13.81	23.48	2.53	0	7.85	10.11	1.29	0	0	8.19	4.04	0	0	0	0	34.31	9.06	0	0	0	13.58	25.63	0	39.93	0	0	24.93	8.87	7.62	11.43	0	0	9.69	0	0	7
OTUD6B	7.86	0	9.87	0	18.61	12.51	7.51	27.75	0	0	0	0	8.57	4.6	18.78	25.28	0	0	16.85	24.47	0	0	0	8.08	4.8	0	9.19	0	42.89	16.3	0	6.8	31.07	34.93	2.56	0	0	0	0	0	14.78	0	3.81	0	6.47	21.81	5.48	0	0
VASN	7.86	23.84	21.38	0	13.03	10.01	0	15.69	0	0	10.2	18.87	8.57	4.6	9.39	22.75	0	0	13.48	5.15	0	7.65	0	0	0	0	0	0	0	28.98	0	6.8	23.3	9.7	7.69	0	0	0	0	0	0	15.24	11.43	0	45.28	12.12	0	0	38.52
UBTD2	20.09	18.55	4.93	0	7.44	7.5	0	1.21	0	0	0	66.04	0	6.91	9.39	7.58	0	3.93	26.96	15.45	0	1.91	0	0	0	0	0	0	17.15	19.92	0	20.4	36.25	36.87	12.81	0	33.78	0	60.07	0	2.96	0	0	0	0	16.96	0	0	0
TMCC3	16.6	10.6	0	0	20.47	0	0	34.99	0	0	22.67	0	0	9.21	9.39	7.58	0	3.93	10.11	6.44	0	17.21	16.37	0	0	0	24.51	0	0	16.3	0	0	18.12	15.52	2.56	11.5	86	10.29	20.02	0	0	7.62	7.62	0	16.17	9.69	16.44	0	0
SLC17A8	0.87	0	1.64	0	14.89	17.51	0	0	0	0	0	0	39.98	0	0	0	0	0	0	0	4.2	0	0	4.04	12.01	9.62	6.13	0	0	5.43	0	0	0	3.88	0	0	0	0	0	0	0	7.62	0	101.83	9.7	0	0	109.55	3.5
ZNF576	9.61	0	0	0	11.17	7.5	0	0	0	7.71	6.8	0	0	20.72	23.48	15.17	0	3.93	3.37	11.59	0	0	24.56	0	7.21	0	15.32	0	0	12.68	0	3.4	5.18	3.88	2.56	0	21.5	0	75.09	34.91	20.69	3.81	3.81	8.49	0	2.42	0	71.89	3.5
ANKRD18A	0	0	21.38	0	5.58	5	45.04	2.41	0	0	34	28.3	2.86	6.91	4.7	10.11	0	27.48	33.7	0	0	7.65	10.91	12.11	2.4	19.23	0	0	0	25.36	0	13.6	12.95	36.87	10.25	0	0	0	0	44.88	2.96	0	0	0	0	0	1.83	3.42	7
CUL3	27.08	0	8.22	0	0	20.01	1.88	19.31	0	0	11.33	18.87	11.42	11.51	28.18	20.23	0	7.85	20.22	0	0	0	2.73	28.26	0	19.23	0	0	8.58	19.92	0	3.4	12.95	34.93	12.81	0	0	2.57	0	19.95	0	19.05	3.81	0	0	0	0	6.85	0
CCPG1	13.1	0	6.58	0	0	10.01	11.26	8.45	0	0	9.07	0	2.86	6.91	18.78	25.28	0	0	26.96	6.44	0	0	2.73	8.08	0	0	9.19	0	0	7.25	0	13.6	5.18	13.58	33.31	0	0	0	30.04	14.96	11.82	0	22.85	0	12.94	9.69	18.27	0	0
FRMD4B	6.99	2.65	8.22	0	14.89	35.02	0	6.03	0	19.27	5.67	0	22.85	9.21	32.87	2.53	0	7.85	13.48	14.16	0	1.91	13.64	8.08	7.21	0	0	0	8.58	1.81	0	10.2	38.84	15.52	10.25	11.5	3.07	25.74	25.03	0	0	7.62	11.43	12.73	0	0	21.92	0	31.51
MAPRE3	6.11	0	4.93	0	9.31	5	1.88	0	0	0	12.47	56.61	0	2.3	0	5.06	0	0	13.48	7.73	0	7.65	0	0	40.83	0	0	0	0	7.25	0	23.8	2.59	5.82	15.38	0	12.29	23.16	10.01	0	2.96	0	3.81	4.24	25.87	4.85	23.75	0	0
HIST3H2A	0	0	0	0	0	0	0	0	12.45	0	0	0	0	0	0	20.23	0	3.93	3.37	0	0	0	0	8.08	0	0	0	0	0	19.92	0	0	0	0	0	53.68	0	0	5.01	0	0	15.24	0	12.73	16.17	0	10.96	112.98	45.52
MANSC1	13.98	13.25	8.22	0	37.22	0	37.54	18.1	0	15.42	9.07	0	8.57	16.11	65.74	2.53	0	3.93	6.74	30.9	0	0	0	0	0	21.64	18.38	0	17.15	3.62	0	17	20.71	25.23	12.81	3.83	18.43	0	0	0	20.69	0	11.43	0	0	0	5.48	0	0
LCLAT1	10.48	2.65	24.67	0	31.64	25.02	5.63	0	0	0	13.6	28.3	2.86	13.81	4.7	7.58	0	3.93	0	1.29	0	0	16.37	12.11	2.4	2.4	9.19	0	0	21.74	0	3.4	2.59	23.29	2.56	0	3.07	12.87	0	0	8.87	19.05	0	0	12.94	29.08	0	0	24.51
PRSS22	11.36	2.65	1.64	0	0	10.01	0	13.27	0	3.85	13.6	9.43	8.57	0	0	7.58	0	0	33.7	12.88	58.8	9.56	8.19	0	0	2.4	0	0	25.73	25.36	0	30.6	5.18	3.88	0	15.34	0	0	5.01	4.99	17.74	0	34.28	0	9.7	16.96	51.15	0	14.01
MUC1	40.18	71.53	0	0	0	0	0	13.27	0	3.85	0	0	0	0	4.7	5.06	0	11.78	33.7	3.86	16.8	3.83	30.01	4.04	24.02	0	3.06	0	77.2	18.11	0	0	10.36	7.76	7.69	0	0	0	0	0	0	0	0	0	0	0	0	0	94.54
RANBP6	0.87	0	18.09	0	3.72	25.02	11.26	8.45	0	0	12.47	0	0	6.91	18.78	17.7	0	15.7	10.11	21.89	0	0	2.73	60.56	28.82	0	27.57	0	25.73	14.49	0	3.4	15.54	13.58	5.13	0	0	15.44	20.02	0	2.96	38.11	0	0	12.94	4.85	3.65	3.42	0
CTDSP2	7.86	0	1.64	0	24.2	20.01	0	10.86	0	3.85	5.67	18.87	0	0	9.39	22.75	0	0	20.22	0	0	3.83	0	12.11	0	0	0	0	25.73	25.36	0	23.8	10.36	17.46	7.69	49.84	0	0	35.04	4.99	11.82	3.81	0	0	6.47	2.42	25.57	0	3.5
METTL1	14.85	0	26.31	0	7.44	27.52	0	12.07	0	0	0	0	0	18.41	9.39	12.64	0	3.93	3.37	36.05	0	0	0	4.04	2.4	7.21	0	0	0	10.87	0	0	2.59	11.64	12.81	0	0	0	0	0	35.47	0	0	0	0	14.54	1.83	0	28.01
RNF103	13.98	2.65	6.58	0	3.72	20.01	20.64	0	24.9	38.54	13.6	0	8.57	2.3	9.39	17.7	0	3.93	47.18	18.03	0	17.21	0	0	0	12.02	0	0	17.15	21.74	0	17	51.79	31.05	15.38	0	0	0	0	0	0	0	0	0	0	19.39	0	0	10.5
CCP110	14.85	0	9.87	0	1.86	17.51	39.41	12.07	0	0	6.8	0	8.57	6.91	4.7	25.28	0	0	10.11	10.3	0	0	0	0	0	2.4	0	0	8.58	48.9	0	17	10.36	25.23	12.81	0	15.36	0	0	0	0	34.3	19.04	0	54.98	24.23	0	0	0
KAT6B	10.48	0	6.58	0	16.75	12.51	16.89	14.48	0	0	17	0	0	0	9.39	2.53	0	0	26.96	18.03	0	0	0	0	55.24	14.42	9.19	0	0	27.17	0	17	25.89	15.52	20.5	26.84	12.29	0	5.01	0	8.87	0	7.62	16.97	0	19.39	0	0	0
SYVN1	14.85	2.65	1.64	0	5.58	5	13.14	4.83	0	19.27	17	66.04	0	0	14.09	17.7	0	3.93	13.48	6.44	0	13.39	5.46	0	0	2.4	12.25	0	0	14.49	0	3.4	31.07	23.29	12.81	15.34	0	20.59	5.01	0	2.96	0	3.81	8.49	3.23	0	0	0	10.5
ANKRD46	14.85	7.95	9.87	0	7.44	5	16.89	22.93	0	0	11.33	0	28.56	2.3	14.09	12.64	0	15.7	20.22	20.6	8.4	0	0	0	38.43	2.4	12.25	0	34.31	5.43	0	3.4	18.12	15.52	15.38	0	0	0	0	0	0	0	3.81	16.97	19.4	0	16.44	0	17.51
ORAI1	7.86	0	0	0	0	0	1.88	9.65	0	0	17	0	0	0	42.26	20.23	0	11.78	10.11	2.58	37.8	40.16	0	0	0	16.83	0	0	8.58	70.64	0	17	18.12	23.29	10.25	0	0	0	0	0	0	0	0	0	0	14.54	0	0	21.01
USP22	10.48	7.95	13.16	0	9.31	2.5	9.38	13.27	12.45	0	2.27	28.3	2.86	2.3	9.39	15.17	0	0	23.59	0	8.4	3.83	8.19	4.04	12.01	12.02	0	0	17.15	12.68	0	10.2	28.48	13.58	12.81	26.84	0	0	25.03	0	0	0	3.81	4.24	0	0	0	13.69	0
MZT2A	31.45	2.65	0	0	3.72	0	7.51	0	0	0	4.53	37.74	2.86	0	0	30.34	0	19.63	3.37	6.44	0	0	24.56	0	0	9.62	0	0	25.73	25.36	0	13.6	25.89	15.52	2.56	0	0	0	0	4.99	0	0	0	0	0	26.66	7.31	0	17.51
PIAS4	6.99	21.19	16.45	0	0	7.5	35.66	4.83	0	0	14.73	9.43	31.41	6.91	0	22.75	0	7.85	6.74	1.29	0	3.83	27.28	20.19	0	14.42	3.06	0	0	19.92	0	17	7.77	19.41	10.25	0	27.64	0	10.01	0	0	22.87	0	21.21	29.11	0	0	0	10.5
WARS	20.09	26.49	8.22	0	5.58	20.01	0	21.72	0	19.27	18.13	0	2.86	27.62	32.87	5.06	0	11.78	23.59	5.15	0	0	0	0	0	0	0	0	0	3.62	0	3.4	5.18	11.64	15.38	3.83	15.36	33.46	0	0	0	0	30.47	0	0	19.39	23.75	0	14.01
FAM208B	15.72	0	6.58	0	1.86	15.01	5.63	4.83	0	0	13.6	0	19.99	2.3	23.48	22.75	0	0	16.85	16.74	0	3.83	8.19	24.23	4.8	16.83	0	0	25.73	38.04	0	3.4	23.3	58.22	23.06	7.67	12.29	0	0	0	23.65	3.81	0	8.49	12.94	4.85	0	0	0
NCOR2	31.45	0	13.16	0	7.44	20.01	18.77	6.03	0	0	1.13	0	14.28	2.3	28.18	15.17	0	0	6.74	0	0	0	0	0	0	2.4	0	0	0	19.92	0	27.2	62.14	3.88	7.69	0	0	64.34	0	0	2.96	0	3.81	0	3.23	26.66	0	71.89	0
C5orf22	16.6	10.6	4.93	0	13.03	20.01	11.26	9.65	0	3.85	3.4	0	22.85	11.51	4.7	7.58	0	3.93	10.11	2.58	0	26.78	0	8.08	33.63	16.83	12.25	0	0	14.49	0	3.4	15.54	17.46	5.13	0	0	0	30.04	0	32.52	0	22.85	0	3.23	7.27	3.65	0	0
FAM126B	13.98	15.9	3.29	0	11.17	22.51	3.75	4.83	0	0	6.8	0	17.13	0	9.39	7.58	0	3.93	30.33	12.88	4.2	34.43	5.46	8.08	16.81	7.21	21.45	0	0	21.74	0	6.8	7.77	9.7	5.13	0	0	10.29	10.01	0	5.91	0	0	16.97	9.7	24.23	16.44	0	10.5
TRIM25	7.86	0	0	0	16.75	2.5	5.63	1.21	0	0	12.47	28.3	0	4.6	14.09	17.7	0	0	37.07	21.89	4.2	0	0	0	0	4.81	0	0	0	30.79	0	3.4	2.59	32.99	0	3.83	0	0	0	29.92	0	0	0	0	25.87	7.27	1.83	37.66	52.52
UHMK1	13.98	34.44	1.64	0	20.47	12.51	9.38	4.83	0	0	10.2	9.43	0	13.81	18.78	10.11	0	3.93	40.44	11.59	0	7.65	21.83	0	0	2.4	0	0	0	36.23	0	6.8	28.48	23.29	7.69	0	6.14	0	0	0	8.87	0	45.7	0	0	0	0	0	0
CGRRF1	18.34	7.95	11.51	0	22.33	0	15.01	12.07	0	7.71	2.27	0	11.42	16.11	14.09	32.87	0	11.78	16.85	1.29	0	17.21	32.74	0	0	0	0	0	25.73	18.11	0	3.4	0	23.29	7.69	53.68	0	0	0	0	0	0	0	0	0	0	0	0	21.01
NUP153	18.34	15.9	1.64	0	22.33	7.5	33.78	14.48	0	0	18.13	28.3	25.7	4.6	28.18	10.11	0	0	23.59	10.3	0	0	2.73	0	0	0	0	0	0	36.23	0	13.6	36.25	58.22	5.13	0	3.07	0	0	0	0	19.05	19.04	0	25.87	2.42	0	0	0
SGF29	12.23	21.19	0	0	9.31	0	0	13.27	0	0	0	18.87	14.28	6.91	0	10.11	0	0	6.74	5.15	0	0	0	0	2.4	0	0	0	0	10.87	0	6.8	0	3.88	2.56	0	55.28	15.44	0	0	8.87	26.68	0	25.46	0	36.35	3.65	0	0
TACC2	6.11	0	6.58	0	26.06	0	35.66	7.24	0	0	6.8	0	37.12	9.21	4.7	15.17	0	27.48	0	1.29	0	0	2.73	0	0	0	0	0	8.58	30.79	0	3.4	23.3	23.29	0	0	27.64	0	5.01	29.92	26.61	60.97	0	0	0	0	0	0	0
LINC00506	3.49	0	18.09	0	0	25.02	1.88	1.21	0	0	27.2	0	11.42	4.6	28.18	7.58	0	0	30.33	7.73	0	0	10.91	12.11	21.62	2.4	3.06	0	42.89	21.74	0	23.8	7.77	21.35	5.13	0	36.86	0	0	4.99	2.96	0	0	0	3.23	0	9.13	6.85	0
TOPORS-AS1	7.86	13.25	23.03	0	0	0	0	8.45	0	0	45.34	0	2.86	0	0	15.17	0	31.41	13.48	15.45	0	3.83	5.46	20.19	38.43	38.47	9.19	0	8.58	5.43	0	34	5.18	5.82	7.69	3.83	18.43	0	0	0	0	0	0	0	25.87	9.69	7.31	0	24.51
AGPAT4	20.09	5.3	0	0	13.03	0	18.77	20.51	0	3.85	15.87	0	25.7	11.51	4.7	5.06	0	54.96	6.74	23.18	0	1.91	27.28	0	0	9.62	0	0	17.15	19.92	0	3.4	18.12	7.76	5.13	61.34	18.43	20.59	35.04	0	2.96	22.87	0	0	0	2.42	1.83	0	0
FAT2	31.45	2.65	3.29	0	24.2	2.5	1.88	37.4	12.45	7.71	30.6	0	2.86	25.32	0	5.06	0	0	3.37	6.44	0	5.74	2.73	8.08	0	0	61.27	0	8.58	12.68	0	0	33.66	15.52	0	0	0	0	40.05	14.96	38.43	0	0	0	0	2.42	5.48	0	0
LGSN	13.98	7.95	3.29	0	5.58	0	11.26	24.13	37.34	0	1.13	0	2.86	0	0	2.53	0	15.7	13.48	16.74	0	24.86	32.74	4.04	76.86	4.81	6.13	0	0	32.6	0	0	28.48	11.64	0	30.67	0	0	0	29.92	0	7.62	15.23	0	0	33.93	0	0	0
TDRD6	9.61	7.95	14.8	0	24.2	2.5	7.51	9.65	0	7.71	28.33	0	22.85	6.91	0	25.28	0	23.55	0	43.78	0	0	38.2	0	0	9.62	49.02	0	0	9.06	0	6.8	25.89	9.7	15.38	0	0	0	0	0	2.96	0	0	4.24	0	2.42	0	0	0
TRIM6	14.85	2.65	31.25	0	3.72	15.01	0	6.03	0	0	7.93	0	0	0	23.48	25.28	0	15.7	23.59	6.44	79.8	0	13.64	4.04	9.61	31.25	21.45	0	0	25.36	0	3.4	2.59	27.17	38.44	0	0	28.31	15.02	0	0	11.43	0	4.24	3.23	0	0	3.42	0
ABHD17C	6.99	0	0	0	5.58	0	0	6.03	62.24	3.85	3.4	56.61	2.86	6.91	9.39	12.64	0	0	10.11	0	0	1.91	0	8.08	0	0	6.13	0	8.58	30.79	0	3.4	36.25	13.58	10.25	0	18.43	0	0	0	0	26.68	0	0	0	0	40.19	0	17.51
CEP104	20.96	7.95	0	0	5.58	20.01	11.26	6.03	62.24	0	12.47	9.43	0	6.91	23.48	17.7	0	11.78	3.37	16.74	0	0	13.64	20.19	7.21	0	15.32	0	0	19.92	0	0	51.79	11.64	7.69	0	6.14	25.74	0	0	0	0	0	0	22.64	9.69	31.05	0	0
RPS6KA5	15.72	5.3	4.93	0	14.89	0	16.89	14.48	0	0	30.6	0	2.86	0	9.39	2.53	0	15.7	3.37	10.3	0	0	0	0	31.22	26.45	3.06	0	34.31	43.47	0	0	36.25	11.64	12.81	11.5	0	0	55.07	0	2.96	0	0	8.49	0	7.27	0	0	0
MTUS1	2.62	0	0	0	1.86	25.02	1.88	2.41	0	26.98	28.33	9.43	0	0	9.39	50.57	0	0	0	0	0	1.91	2.73	0	0	0	6.13	0	0	25.36	0	3.4	5.18	13.58	35.88	0	0	0	0	0	0	22.87	49.51	0	0	21.81	0	0	17.51
N4BP1	21.84	0	16.45	0	0	30.02	26.27	7.24	0	38.54	0	0	0	0	23.48	12.64	0	0	43.81	1.29	0	15.3	5.46	32.3	12.01	0	0	0	0	25.36	0	20.4	25.89	17.46	5.13	0	3.07	38.6	0	0	0	0	0	29.7	0	4.85	5.48	0	17.51
INTS4	10.48	0	1.64	0	3.72	0	13.14	3.62	0	0	10.2	9.43	8.57	18.41	14.09	30.34	0	11.78	3.37	1.29	0	3.83	0	4.04	0	14.42	36.76	0	0	7.25	0	17	20.71	7.76	12.81	11.5	12.29	0	0	0	5.91	0	22.85	50.91	9.7	9.69	31.05	0	17.51
NSUN2	11.36	0	4.93	0	3.72	22.51	0	9.65	0	3.85	22.67	18.87	14.28	6.91	0	10.11	0	7.85	16.85	18.03	12.6	11.48	2.73	8.08	33.63	21.64	30.64	0	17.15	19.92	0	3.4	23.3	21.35	5.13	0	0	0	0	44.88	11.82	34.3	0	38.19	6.47	19.39	0	0	0
NUPL2	8.73	29.14	9.87	0	16.75	0	0	10.86	0	0	4.53	0	42.84	20.72	9.39	17.7	0	31.41	0	1.29	16.8	45.9	16.37	0	0	0	30.64	0	0	23.55	0	6.8	2.59	15.52	33.31	0	18.43	0	5.01	4.99	14.78	0	0	21.21	0	38.77	0	0	24.51
SAV1	24.46	0	26.31	0	0	5	0	15.69	0	0	15.87	0	0	6.91	9.39	20.23	0	3.93	111.22	1.29	0	0	5.46	8.08	0	0	3.06	0	0	21.74	0	13.6	20.71	29.11	20.5	0	0	0	0	9.97	0	0	15.23	0	9.7	9.69	0	0	66.53
MFN1	8.73	0	0	0	7.44	0	7.51	21.72	0	7.71	11.33	9.43	2.86	20.72	9.39	7.58	0	27.48	16.85	14.16	8.4	9.56	0	8.08	0	14.42	0	0	8.58	16.3	0	17	18.12	23.29	2.56	0	3.07	38.6	10.01	0	8.87	0	15.23	0	0	21.81	16.44	0	31.51
ARHGEF12	12.23	23.84	0	0	1.86	25.02	7.51	2.41	12.45	0	0	75.48	22.85	18.41	14.09	12.64	0	7.85	23.59	5.15	16.8	3.83	5.46	8.08	0	28.85	12.25	0	0	39.85	0	3.4	25.89	42.69	2.56	0	0	0	5.01	0	0	0	22.85	0	9.7	4.85	0	0	28.01
FHDC1	26.2	7.95	0	0	1.86	2.5	7.51	15.69	12.45	7.71	0	28.3	34.27	9.21	4.7	22.75	0	0	0	33.48	16.8	1.91	19.1	0	0	0	0	0	34.31	36.23	0	3.4	5.18	19.41	0	0	49.14	0	10.01	0	0	3.81	0	0	29.11	0	0	30.81	3.5
TTF1	22.71	0	9.87	0	14.89	0	0	12.07	0	0	30.6	0	5.71	0	4.7	20.23	0	0	6.74	0	0	0	21.83	0	0	0	0	0	0	38.04	0	27.2	7.77	13.58	15.38	3.83	0	92.65	0	0	14.78	60.97	0	0	0	26.66	32.88	0	0
CBFB	26.2	7.95	11.51	0	5.58	12.51	0	0	0	0	0	9.43	8.57	2.3	37.57	12.64	0	7.85	10.11	5.15	0	0	32.74	0	4.8	14.42	3.06	0	0	21.74	0	10.2	20.71	23.29	7.69	0	0	0	0	0	20.69	3.81	0	0	0	0	7.31	47.93	52.52
NFKB1	14.85	2.65	1.64	0	3.72	7.5	9.38	4.83	0	0	0	18.87	2.86	2.3	23.48	15.17	0	0	30.33	37.34	0	13.39	16.37	20.19	0	4.81	0	0	8.58	10.87	0	13.6	20.71	13.58	2.56	23	33.78	38.6	15.02	0	0	0	114.26	0	3.23	0	0	0	0
GCH1	0	15.9	4.93	0	27.92	30.02	0	19.31	0	7.71	38.53	9.43	0	9.21	4.7	10.11	0	15.7	16.85	5.15	0	3.83	8.19	20.19	24.02	19.23	0	0	0	32.6	0	10.2	12.95	5.82	7.69	15.34	0	0	0	0	17.74	0	7.62	42.43	3.23	0	21.92	0	14.01
QRSL1	13.98	2.65	3.29	0	29.78	10.01	22.52	12.07	0	0	9.07	0	25.7	25.32	4.7	7.58	0	0	3.37	15.45	37.8	9.56	16.37	0	12.01	14.42	3.06	0	0	25.36	0	10.2	10.36	11.64	12.81	0	6.14	20.59	0	0	14.78	26.68	3.81	0	0	29.08	42.01	0	0
UTP14C	15.72	0	1.64	0	1.86	17.51	0	8.45	0	0	18.13	84.91	0	0	23.48	10.11	0	0	37.07	11.59	0	0	0	0	4.8	0	0	0	0	28.98	0	23.8	51.79	40.75	15.38	0	49.14	25.74	0	0	5.91	0	0	21.21	0	0	27.4	0	0
URGCP	13.98	2.65	18.09	0	1.86	5	16.89	13.27	0	7.71	40.8	0	11.42	32.22	18.78	27.81	0	0	20.22	0	0	3.83	13.64	0	4.8	16.83	3.06	0	0	19.92	0	3.4	25.89	19.41	10.25	76.68	15.36	18.02	0	34.91	0	11.43	0	4.24	0	14.54	5.48	0	0
EXOC4	9.61	2.65	4.93	0	20.47	0	11.26	10.86	0	3.85	0	0	5.71	18.41	4.7	15.17	0	0	6.74	25.75	0	1.91	0	16.15	4.8	45.68	6.13	0	0	23.55	0	23.8	36.25	34.93	5.13	0	0	0	40.05	0	14.78	72.41	0	4.24	19.4	14.54	14.61	0	3.5
RAB11B-AS1	5.24	29.14	16.45	0	9.31	0	1.88	16.89	0	0	7.93	0	0	0	9.39	10.11	0	0	23.59	19.31	33.6	19.13	30.01	4.04	14.41	0	0	0	17.15	9.06	0	23.8	10.36	13.58	20.5	0	0	28.31	0	0	53.21	0	0	0	25.87	21.81	0	0	0
SMG7	7.86	2.65	0	0	26.06	15.01	9.38	0	0	11.56	47.6	18.87	22.85	11.51	23.48	15.17	0	7.85	16.85	16.74	0	11.48	8.19	40.38	50.44	21.64	3.06	0	8.58	25.36	0	10.2	20.71	25.23	7.69	0	30.71	0	0	0	0	11.43	0	0	32.34	14.54	1.83	0	0
TMEM106C	7.86	15.9	6.58	0	7.44	20.01	5.63	19.31	62.24	42.39	10.2	0	11.42	0	4.7	17.7	0	3.93	3.37	21.89	42	17.21	16.37	0	2.4	0	0	0	0	18.11	0	0	2.59	7.76	38.44	26.84	12.29	0	0	19.95	0	0	0	0	12.94	14.54	1.83	0	0
CAB39	8.73	29.14	1.64	0	11.17	7.5	9.38	2.41	0	0	27.2	47.17	11.42	4.6	46.96	15.17	0	23.55	13.48	1.29	21	7.65	30.01	0	0	4.81	3.06	0	0	23.55	0	30.6	75.09	31.05	17.94	26.84	3.07	0	5.01	0	0	7.62	11.43	0	0	0	0	0	17.51
MRPL16	6.11	0	14.8	0	20.47	0	37.54	16.89	0	30.83	15.87	0	11.42	27.62	4.7	32.87	0	19.63	6.74	20.6	0	0	10.91	0	0	50.49	6.13	0	17.15	10.87	0	13.6	7.77	11.64	17.94	0	55.28	0	0	49.87	0	38.11	0	8.49	0	2.42	20.09	0	0
ZFAND3	12.23	0	9.87	0	16.75	7.5	11.26	7.24	0	15.42	17	18.87	8.57	41.43	9.39	12.64	0	19.63	26.96	16.74	0	17.21	0	0	24.02	0	0	0	0	23.55	0	10.2	36.25	27.17	12.81	0	0	0	5.01	0	2.96	0	3.81	21.21	0	4.85	0	3.42	0
GJB7	41.05	21.19	0	0	26.06	7.5	15.01	25.34	0	34.69	22.67	0	2.86	6.91	9.39	2.53	0	19.63	3.37	12.88	12.6	9.56	5.46	16.15	0	19.23	18.38	0	17.15	16.3	0	0	15.54	17.46	7.69	0	24.57	0	0	0	14.78	0	0	0	0	4.85	25.57	0	3.5
HIVEP3	22.71	5.3	21.38	0	22.33	45.03	1.88	21.72	24.9	0	15.87	0	0	6.91	9.39	35.4	0	7.85	6.74	38.63	0	17.21	0	4.04	14.41	14.42	18.38	0	0	21.74	0	17	5.18	23.29	20.5	0	33.78	0	0	0	0	26.68	0	0	0	0	0	47.93	49.02
SIAE	8.73	5.3	9.87	0	9.31	7.5	3.75	28.96	0	7.71	5.67	0	17.13	20.72	9.39	5.06	0	3.93	13.48	2.58	0	40.16	13.64	28.26	4.8	2.4	6.13	0	8.58	9.06	0	13.6	18.12	5.82	5.13	30.67	9.21	36.03	0	0	29.56	34.3	26.66	12.73	9.7	4.85	3.65	30.81	7
TMEM181	25.33	0	19.74	0	33.5	20.01	3.75	19.31	0	11.56	5.67	28.3	0	11.51	9.39	32.87	0	3.93	47.18	7.73	0	0	2.73	0	0	28.85	0	0	0	19.92	0	10.2	28.48	34.93	2.56	0	86	0	0	24.93	0	0	22.85	0	0	0	0	0	0
TMEM57	14.85	10.6	14.8	0	16.75	22.51	11.26	16.89	12.45	0	30.6	0	0	2.3	14.09	15.17	0	3.93	23.59	27.04	0	0	0	0	0	21.64	9.19	0	8.58	48.9	0	10.2	54.37	34.93	15.38	0	0	28.31	0	19.95	0	0	0	0	6.47	53.31	0	0	0
MEST	13.98	29.14	54.27	0	7.44	2.5	13.14	3.62	0	3.85	20.4	0	8.57	18.41	0	0	0	23.55	30.33	9.01	0	1.91	21.83	0	7.21	4.81	0	0	0	16.3	0	64.59	0	11.64	53.82	3.83	12.29	0	5.01	0	11.82	0	0	0	16.17	33.93	32.88	0	3.5
DIAPH2	14.85	10.6	4.93	0	16.75	5	22.52	15.69	0	19.27	27.2	0	0	2.3	0	2.53	0	7.85	10.11	29.62	0	0	60.03	8.08	28.82	28.85	15.32	0	17.15	9.06	0	17	51.79	21.35	17.94	0	0	0	0	0	0	0	15.23	21.21	0	0	0	41.08	0
LINC00467	15.72	10.6	1.64	0	9.31	0	39.41	21.72	0	7.71	0	0	34.27	13.81	23.48	0	0	0	43.81	5.15	0	0	0	28.26	0	0	36.76	0	0	18.11	0	0	20.71	17.46	35.88	0	0	0	15.02	0	23.65	0	0	0	0	0	0	78.74	31.51
ADNP	21.84	2.65	4.93	0	14.89	0	15.01	1.21	74.69	11.56	29.47	0	2.86	2.3	18.78	20.23	0	7.85	6.74	15.45	8.4	11.48	35.47	4.04	12.01	0	12.25	0	0	34.41	0	0	12.95	42.69	15.38	0	52.21	0	0	0	0	0	0	0	38.81	0	1.83	3.42	7
AFAP1L1	12.23	29.14	3.29	0	20.47	7.5	3.75	21.72	0	26.98	38.53	37.74	5.71	39.13	0	12.64	0	11.78	13.48	14.16	4.2	21.04	16.37	12.11	0	7.21	9.19	0	0	21.74	0	17	18.12	25.23	2.56	15.34	3.07	2.57	0	29.92	0	0	7.62	25.46	22.64	2.42	5.48	0	3.5
AMPD2	0.87	23.84	16.45	0	0	5	33.78	20.51	0	0	18.13	0	5.71	2.3	37.57	10.11	0	0	13.48	6.44	4.2	17.21	10.91	12.11	14.41	4.81	12.25	0	17.15	18.11	0	6.8	31.07	23.29	10.25	0	3.07	12.87	20.02	0	11.82	19.05	7.62	21.21	12.94	7.27	20.09	0	10.5
NIPSNAP3A	30.57	7.95	9.87	0	0	35.02	26.27	0	0	0	4.53	0	8.57	36.83	9.39	10.11	0	11.78	37.07	47.64	0	5.74	32.74	0	0	0	6.13	0	8.58	12.68	0	13.6	20.71	11.64	38.44	0	0	0	0	0	2.96	0	34.28	16.97	0	0	69.41	0	0
CMSS1	37.56	31.79	27.96	0	9.31	15.01	7.51	62.74	0	0	23.8	0	5.71	11.51	9.39	27.81	0	19.63	6.74	10.3	33.6	1.91	30.01	0	0	2.4	0	0	8.58	3.62	0	6.8	7.77	9.7	35.88	3.83	12.29	0	25.03	34.91	0	0	0	0	25.87	16.96	43.84	3.42	0
FAM91A1	20.96	37.09	41.12	0	3.72	25.02	0	14.48	0	0	6.8	66.04	0	6.91	23.48	10.11	0	0	74.14	16.74	4.2	11.48	5.46	0	0	2.4	0	0	51.46	21.74	0	13.6	46.61	3.88	20.5	3.83	0	0	0	4.99	0	19.05	3.81	4.24	12.94	12.12	5.48	0	28.01
C8orf76	29.7	5.3	6.58	0	9.31	5	5.63	3.62	0	0	17	9.43	17.13	6.91	23.48	15.17	0	11.78	13.48	12.88	16.8	42.08	0	44.41	16.81	19.23	24.51	0	0	16.3	0	3.4	31.07	17.46	20.5	15.34	3.07	0	0	0	23.65	0	0	4.24	0	0	47.49	0	3.5
NKRF	29.7	10.6	1.64	0	50.25	5	7.51	12.07	49.79	11.56	36.27	0	19.99	16.11	4.7	5.06	0	3.93	26.96	1.29	0	7.65	0	0	4.8	2.4	0	0	0	10.87	0	3.4	23.3	29.11	17.94	0	15.36	2.57	15.02	44.88	0	11.43	30.47	4.24	3.23	4.85	69.41	10.27	7
ABCD4	10.48	15.9	1.64	0	7.44	0	37.54	19.31	0	0	24.93	0	25.7	16.11	18.78	12.64	0	7.85	13.48	6.44	54.6	13.39	27.28	0	14.41	2.4	18.38	0	0	14.49	0	3.4	0	1.94	5.13	0	15.36	2.57	0	4.99	17.74	3.81	0	12.73	0	21.81	1.83	44.51	24.51
KANK1	6.99	0	39.47	0	5.58	32.52	15.01	0	0	23.12	11.33	0	22.85	0	61.05	25.28	0	0	47.18	7.73	4.2	0	0	8.08	16.81	9.62	0	0	17.15	10.87	0	23.8	31.07	31.05	43.56	0	0	0	30.04	0	0	0	0	0	0	0	0	0	17.51
DTD1	2.62	10.6	37.83	0	16.75	0	18.77	14.48	0	3.85	0	0	51.4	0	28.18	37.92	0	7.85	16.85	0	16.8	0	21.83	0	0	0	30.64	0	17.15	19.92	0	6.8	18.12	27.17	7.69	61.34	0	0	0	39.89	17.74	22.87	0	46.67	0	16.96	27.4	0	0
ABHD13	12.23	0	3.29	0	29.78	10.01	0	6.03	0	0	18.13	0	17.13	9.21	4.7	32.87	0	7.85	0	20.6	33.6	7.65	13.64	44.41	2.4	0	12.25	0	17.15	16.3	0	6.8	12.95	27.17	7.69	0	0	7.72	0	0	20.69	3.81	30.47	4.24	0	12.12	0	0	70.03
STK25	7.86	10.6	14.8	0	35.36	10.01	31.91	7.24	0	0	24.93	0	11.42	9.21	18.78	17.7	0	27.48	26.96	14.16	0	1.91	21.83	8.08	16.81	0	0	0	0	23.55	0	10.2	33.66	21.35	20.5	0	0	0	0	0	35.47	15.24	3.81	12.73	3.23	0	76.72	58.2	10.5
ARX	24.46	5.3	23.03	0	11.17	35.02	35.66	7.24	0	0	11.33	18.87	0	0	4.7	12.64	0	23.55	10.11	7.73	4.2	1.91	21.83	0	28.82	2.4	21.45	0	0	9.06	0	13.6	10.36	5.82	10.25	0	46.07	0	0	0	11.82	15.24	0	0	22.64	4.85	0	0	10.5
QDPR	13.1	10.6	44.41	0	22.33	10.01	0	21.72	0	7.71	1.13	0	0	20.72	4.7	45.51	0	0	10.11	1.29	4.2	13.39	62.75	8.08	4.8	0	36.76	0	0	12.68	0	0	10.36	15.52	15.38	0	67.57	0	0	54.85	0	0	0	0	22.64	0	0	6.85	0
CBFA2T2	6.99	0	1.64	0	0	7.5	24.4	8.45	0	3.85	2.27	18.87	0	0	0	10.11	0	19.63	13.48	0	0	0	16.37	20.19	16.81	0	12.25	187.02	0	7.25	0	0	10.36	1.94	5.13	0	0	2.57	0	0	0	68.6	0	0	29.11	0	0	0	3.5
NHLRC3	6.11	0	9.87	0	13.03	50.03	5.63	4.83	0	7.71	22.67	18.87	0	9.21	4.7	12.64	0	0	6.74	10.3	4.2	0	46.38	44.41	33.63	14.42	27.57	0	0	18.11	0	10.2	0	17.46	5.13	0	86	0	10.01	34.91	0	11.43	0	0	16.17	19.39	9.13	0	7
USP7	15.72	0	6.58	0	27.92	17.51	24.4	7.24	0	26.98	0	0	2.86	2.3	23.48	25.28	0	3.93	43.81	27.04	8.4	0	13.64	0	33.63	2.4	24.51	0	0	36.23	0	17	44.02	42.69	5.13	0	0	18.02	0	59.84	5.91	11.43	7.62	0	35.57	0	1.83	0	35.02
C18orf21	19.22	10.6	3.29	0	35.36	0	18.77	20.51	0	0	26.07	0	2.86	2.3	14.09	22.75	0	27.48	16.85	0	0	1.91	19.1	0	9.61	21.64	42.89	0	8.58	21.74	0	17	12.95	9.7	20.5	0	0	5.15	65.08	0	0	0	60.94	0	0	33.93	20.09	0	0
DHCR24	8.73	10.6	27.96	0	9.31	5	5.63	13.27	0	15.42	20.4	28.3	0	0	32.87	10.11	0	35.33	26.96	15.45	29.4	0	111.87	0	0	7.21	0	0	0	14.49	0	3.4	25.89	29.11	15.38	0	0	0	0	0	0	19.05	3.81	0	9.7	2.42	42.01	10.27	7
HNRNPLL	22.71	0	21.38	0	5.58	7.5	50.67	0	37.34	23.12	17	37.74	0	2.3	4.7	15.17	0	0	26.96	34.77	16.8	0	8.19	4.04	2.4	31.25	15.32	0	8.58	16.3	0	6.8	12.95	17.46	23.06	0	0	0	10.01	0	0	19.05	3.81	0	0	29.08	0	30.81	7
ITGA6	9.61	39.74	13.16	0	16.75	10.01	0	36.2	0	34.69	15.87	0	8.57	29.92	4.7	7.58	0	11.78	13.48	3.86	0	0	35.47	0	12.01	19.23	3.06	0	8.58	14.49	0	13.6	36.25	13.58	17.94	0	39.93	2.57	0	9.97	26.61	0	0	0	0	16.96	1.83	0	21.01
PRKCH	4.37	10.6	16.45	0	0	0	60.06	20.51	49.79	0	34	9.43	0	13.81	23.48	5.06	0	7.85	33.7	5.15	25.2	28.69	2.73	12.11	9.61	16.83	30.64	0	8.58	25.36	0	3.4	31.07	15.52	25.63	23	0	28.31	15.02	0	2.96	22.87	26.66	0	16.17	21.81	0	0	0
YAP1	8.73	0	23.03	0	46.53	2.5	20.64	6.03	0	3.85	2.27	47.17	0	16.11	18.78	32.87	0	31.41	43.81	16.74	12.6	9.56	5.46	8.08	0	9.62	73.53	0	0	45.28	0	30.6	46.61	32.99	35.88	0	0	12.87	0	4.99	0	0	0	21.21	16.17	2.42	1.83	0	0
KIAA0196	13.98	29.14	14.8	0	9.31	7.5	26.27	16.89	0	26.98	19.27	9.43	25.7	13.81	14.09	25.28	0	3.93	10.11	7.73	4.2	9.56	5.46	8.08	14.41	0	0	0	0	16.3	0	10.2	28.48	5.82	10.25	30.67	0	25.74	0	14.96	14.78	11.43	7.62	16.97	22.64	16.96	1.83	13.69	66.53
DHX40	24.46	2.65	8.22	0	9.31	2.5	3.75	4.83	0	15.42	21.53	0	17.13	4.6	23.48	7.58	0	3.93	20.22	11.59	16.8	11.48	5.46	24.23	2.4	24.04	30.64	0	0	41.66	0	17	20.71	34.93	23.06	53.68	0	28.31	15.02	109.7	0	19.05	7.62	0	16.17	2.42	7.31	13.69	17.51
MBNL3	12.23	0	16.45	0	24.2	5	0	76.02	12.45	0	94.07	0	0	13.81	0	7.58	0	15.7	26.96	95.29	4.2	0	16.37	0	0	0	0	0	0	7.25	0	37.4	15.54	58.22	2.56	0	0	0	0	59.84	5.91	0	30.47	0	0	36.35	1.83	3.42	0
MGME1	11.36	0	3.29	0	20.47	22.51	5.63	13.27	0	0	2.27	9.43	0	2.3	9.39	12.64	0	11.78	16.85	36.05	0	7.65	60.03	32.3	9.61	21.64	0	0	8.58	18.11	0	27.2	10.36	19.41	17.94	0	0	0	0	0	0	15.24	60.94	4.24	35.57	21.81	49.32	10.27	0
RANBP2	13.1	5.3	13.16	0	9.31	0	9.38	6.03	0	50.1	13.6	18.87	0	20.72	23.48	10.11	0	15.7	23.59	5.15	12.6	0	68.21	0	19.21	64.91	0	0	0	39.85	0	0	85.45	62.1	25.63	7.67	0	2.57	35.04	0	35.47	0	0	0	0	7.27	1.83	0	0
CS	23.58	2.65	1.64	0	0	7.5	18.77	31.37	49.79	19.27	19.27	0	5.71	4.6	14.09	22.75	0	11.78	10.11	1.29	4.2	0	0	0	31.22	31.25	18.38	0	25.73	27.17	0	13.6	31.07	15.52	12.81	0	0	2.57	15.02	19.95	23.65	3.81	45.7	21.21	0	2.42	49.32	0	0
KDELC2	14.85	7.95	13.16	0	5.58	50.03	0	3.62	0	0	0	0	19.99	36.83	56.35	15.17	0	7.85	23.59	12.88	12.6	9.56	5.46	4.04	19.21	24.04	21.45	0	0	34.41	0	40.8	25.89	44.63	23.06	0	0	0	0	44.88	8.87	0	0	0	0	7.27	1.83	0	0
PRPS1	10.48	0	0	0	35.36	0	30.03	92.91	12.45	0	19.27	0	39.98	9.21	51.66	2.53	0	35.33	13.48	42.49	25.2	1.91	38.2	20.19	14.41	0	42.89	0	17.15	3.62	0	0	18.12	21.35	2.56	19.17	0	12.87	55.07	0	0	0	0	0	6.47	14.54	0	0	0
LRP11	31.45	13.25	14.8	0	7.44	12.51	16.89	15.69	0	11.56	0	18.87	14.28	4.6	42.26	25.28	0	7.85	13.48	9.01	4.2	19.13	10.91	12.11	16.81	7.21	0	0	25.73	43.47	0	13.6	33.66	40.75	43.56	0	0	61.77	0	34.91	2.96	11.43	0	4.24	0	4.85	9.13	0	7
HAUS7	8.73	21.19	8.22	0	22.33	17.51	16.89	8.45	0	3.85	10.2	0	28.56	20.72	14.09	15.17	0	11.78	0	23.18	33.6	3.83	0	4.04	0	24.04	42.89	0	8.58	16.3	0	13.6	7.77	11.64	12.81	19.17	0	0	10.01	0	65.03	0	22.85	12.73	48.51	24.23	23.75	41.08	49.02
C5orf17	8.73	2.65	0	0	42.81	22.51	11.26	44.64	0	0	21.53	18.87	22.85	0	18.78	20.23	0	7.85	13.48	3.86	12.6	28.69	0	48.45	0	0	0	0	34.31	27.17	0	17	10.36	44.63	7.69	0	3.07	36.03	0	0	0	0	0	0	3.23	19.39	21.92	0	42.02
EMC8	20.96	7.95	47.69	0	11.17	0	0	4.83	0	0	27.2	9.43	14.28	29.92	42.26	17.7	0	0	20.22	41.21	0	36.34	0	20.19	0	0	91.91	0	0	30.79	0	17	28.48	3.88	7.69	0	0	0	0	0	2.96	0	0	0	3.23	0	32.88	44.51	52.52
CEMIP	43.67	34.44	0	0	0	0	0	26.55	0	0	132.61	0	14.28	0	51.66	10.11	0	11.78	3.37	10.3	0	0	0	0	21.62	0	30.64	0	25.73	0	0	0	88.03	34.93	10.25	0	3.07	0	0	4.99	2.96	0	45.7	0	3.23	2.42	18.27	0	0
SLC41A3	6.11	18.55	6.58	0	14.89	12.51	0	16.89	0	0	29.47	9.43	17.13	13.81	0	22.75	0	7.85	3.37	45.07	21	5.74	60.03	8.08	14.41	28.85	6.13	0	8.58	67.02	0	20.4	7.77	13.58	5.13	0	18.43	30.88	0	14.96	17.74	95.27	0	16.97	0	4.85	0	0	24.51
SLC2A9	38.43	15.9	24.67	0	26.06	20.01	30.03	25.34	0	3.85	5.67	0	11.42	34.53	0	2.53	0	19.63	20.22	39.92	16.8	36.34	0	44.41	9.61	0	0	0	0	18.11	0	20.4	15.54	7.76	20.5	7.67	9.21	0	0	0	0	38.11	3.81	0	0	41.2	1.83	0	38.52
AUH	11.36	7.95	8.22	0	24.2	17.51	18.77	36.2	0	0	0	0	11.42	29.92	9.39	20.23	0	15.7	6.74	3.86	0	38.25	32.74	16.15	26.42	4.81	0	0	25.73	38.04	0	10.2	2.59	17.46	10.25	0	0	46.33	0	4.99	14.78	0	15.23	0	0	29.08	1.83	0	7
TOR3A	13.1	18.55	19.74	0	22.33	2.5	61.93	19.31	12.45	0	11.33	0	0	9.21	9.39	10.11	0	15.7	13.48	10.3	8.4	15.3	21.83	0	0	26.45	30.64	0	0	10.87	0	6.8	20.71	11.64	20.5	0	3.07	0	30.04	4.99	11.82	15.24	53.32	0	3.23	14.54	20.09	0	0
SOWAHC	14.85	2.65	3.29	0	0	37.52	13.14	15.69	0	3.85	0	18.87	0	9.21	14.09	30.34	0	31.41	23.59	0	4.2	5.74	38.2	4.04	0	9.62	67.4	0	0	56.15	0	13.6	51.79	73.74	25.63	0	0	54.05	0	0	0	0	0	8.49	0	21.81	0	0	0
EMC10	20.09	15.9	24.67	0	29.78	15.01	15.01	9.65	0	0	1.13	56.61	0	25.32	9.39	7.58	0	23.55	87.62	11.59	0	11.48	16.37	8.08	12.01	2.4	3.06	0	0	21.74	0	51	51.79	19.41	5.13	0	3.07	56.62	0	0	17.74	0	3.81	0	6.47	2.42	0	0	3.5
AKT1	20.09	7.95	3.29	0	24.2	2.5	3.75	10.86	0	0	23.8	37.74	14.28	9.21	9.39	20.23	0	3.93	13.48	7.73	12.6	7.65	10.91	12.11	31.22	4.81	6.13	0	0	34.41	0	6.8	54.37	23.29	10.25	15.34	3.07	0	0	19.95	0	45.73	7.62	8.49	0	21.81	0	17.12	35.02
SNHG9	15.72	7.95	6.58	0	35.36	0	22.52	16.89	0	0	22.67	28.3	5.71	0	18.78	25.28	0	15.7	6.74	1.29	8.4	28.69	100.95	12.11	7.21	4.81	6.13	0	0	21.74	0	3.4	23.3	46.57	15.38	0	18.43	0	40.05	9.97	14.78	22.87	11.43	0	22.64	2.42	16.44	30.81	24.51
CNOT1	29.7	34.44	8.22	0	46.53	5	45.04	22.93	0	7.71	52.14	18.87	0	11.51	9.39	27.81	0	11.78	13.48	9.01	0	13.39	2.73	4.04	2.4	16.83	0	0	0	74.26	0	10.2	31.07	25.23	10.25	0	0	25.74	0	9.97	0	0	0	33.94	6.47	33.93	0	3.42	17.51
AIDA	15.72	7.95	8.22	0	1.86	20.01	0	8.45	12.45	19.27	12.47	28.3	0	0	23.48	40.45	0	11.78	74.14	11.59	25.2	30.6	0	0	24.02	7.21	12.25	0	34.31	43.47	0	17	62.14	60.16	12.81	3.83	0	0	5.01	114.69	0	0	30.47	0	3.23	0	20.09	0	14.01
PQLC3	12.23	13.25	11.51	0	31.64	47.53	9.38	8.45	0	0	29.47	0	22.85	4.6	9.39	10.11	0	11.78	10.11	10.3	42	42.08	21.83	40.38	19.21	0	0	0	0	23.55	0	17	10.36	11.64	20.5	7.67	27.64	0	0	0	100.51	0	0	0	12.94	21.81	3.65	0	31.51
HSD17B12	16.6	13.25	13.16	0	3.72	7.5	28.15	30.17	12.45	0	27.2	0	42.84	11.51	23.48	27.81	0	35.33	37.07	16.74	0	9.56	0	0	21.62	0	0	0	17.15	10.87	0	23.8	31.07	15.52	25.63	19.17	24.57	25.74	0	4.99	8.87	7.62	22.85	21.21	0	0	0	58.2	0
RNF19A	13.1	10.6	23.03	0	9.31	52.53	0	13.27	0	0	21.53	9.43	2.86	34.53	0	17.7	0	11.78	33.7	0	8.4	0	13.64	12.11	19.21	16.83	15.32	0	8.58	18.11	0	10.2	28.48	34.93	12.81	0	0	0	15.02	0	0	106.7	19.04	46.67	0	16.96	10.96	23.96	7
SETX	21.84	0	24.67	0	3.72	17.51	3.75	13.27	0	0	0	0	8.57	13.81	9.39	15.17	0	3.93	26.96	30.9	0	7.65	0	0	2.4	52.89	12.25	0	0	28.98	0	10.2	59.55	23.29	43.56	3.83	92.14	7.72	0	14.96	11.82	34.3	3.81	0	29.11	46.04	1.83	0	0
RIOK1	4.37	5.3	0	0	16.75	25.02	16.89	14.48	0	0	29.47	66.04	5.71	13.81	0	22.75	0	7.85	6.74	15.45	0	5.74	16.37	8.08	16.81	14.42	3.06	0	51.46	25.36	0	17	20.71	25.23	12.81	0	6.14	66.91	0	0	23.65	3.81	0	0	0	0	16.44	41.08	35.02
PTH1R	51.54	37.09	77.3	0	48.39	0	24.4	0	0	0	29.47	0	2.86	16.11	14.09	2.53	0	3.93	23.59	23.18	0	9.56	27.28	0	28.82	0	6.13	0	0	7.25	0	6.8	59.55	17.46	2.56	0	0	0	0	0	2.96	0	0	50.91	3.23	0	1.83	0	119.05
GCA	22.71	0	6.58	0	11.17	5	15.01	26.55	0	19.27	49.87	18.87	5.71	71.35	14.09	15.17	0	11.78	10.11	12.88	0	15.3	19.1	0	38.43	28.85	0	0	8.58	9.06	0	3.4	5.18	15.52	5.13	0	6.14	0	0	29.92	44.34	53.35	19.04	0	32.34	65.43	0	0	0
GON7	12.23	0	65.79	0	13.03	35.02	0	22.93	0	19.27	0	0	28.56	2.3	4.7	17.7	0	39.26	16.85	28.33	0	34.43	13.64	12.11	19.21	0	0	0	25.73	14.49	0	54.39	7.77	21.35	25.63	0	21.5	0	0	0	2.96	3.81	0	50.91	19.4	19.39	34.71	41.08	3.5
PPIL1	36.69	26.49	13.16	0	24.2	25.02	1.88	19.31	0	15.42	1.13	0	2.86	25.32	28.18	40.45	0	0	3.37	27.04	50.4	9.56	10.91	24.23	36.03	36.06	0	0	8.58	21.74	0	20.4	2.59	19.41	23.06	38.34	0	2.57	0	0	8.87	34.3	0	21.21	0	2.42	20.09	0	0
GATAD2A	20.09	5.3	19.74	0	16.75	7.5	41.29	6.03	0	15.42	9.07	18.87	25.7	9.21	18.78	12.64	0	0	30.33	39.92	16.8	0	2.73	8.08	7.21	0	6.13	0	34.31	19.92	0	27.2	38.84	36.87	33.31	0	21.5	0	10.01	0	17.74	0	30.47	46.67	0	7.27	0	3.42	0
TEKT4P2	34.07	7.95	14.8	0	13.03	2.5	26.27	22.93	0	69.37	11.33	0	17.13	16.11	4.7	22.75	0	3.93	6.74	34.77	4.2	30.6	24.56	12.11	24.02	0	18.38	0	8.58	7.25	0	20.4	2.59	17.46	12.81	0	0	38.6	20.02	0	8.87	0	3.81	33.94	29.11	53.31	0	0	0
PEX11B	27.08	5.3	0	0	18.61	0	7.51	0	0	0	51	0	0	6.91	9.39	17.7	0	15.7	23.59	0	0	43.99	19.1	28.26	0	0	12.25	0	17.15	16.3	0	6.8	12.95	13.58	28.19	23	61.43	0	50.06	0	11.82	57.16	45.7	4.24	35.57	2.42	10.96	0	0
ZBTB8A	8.73	2.65	18.09	0	18.61	0	22.52	45.85	0	0	2.27	0	2.86	0	9.39	32.87	0	15.7	0	10.3	0	1.91	35.47	0	0	0	0	0	0	45.28	0	6.8	20.71	40.75	7.69	11.5	3.07	0	0	0	0	0	0	0	32.34	46.04	0	133.52	0
STXBP5	16.6	26.49	14.8	0	33.5	50.03	9.38	12.07	0	7.71	3.4	18.87	14.28	0	23.48	22.75	0	7.85	57.29	7.73	8.4	0	0	0	2.4	31.25	24.51	0	8.58	79.7	0	17	25.89	11.64	10.25	42.17	67.57	0	10.01	0	5.91	0	3.81	0	29.11	0	5.48	47.93	21.01
DLG5	20.09	23.84	4.93	0	0	25.02	7.51	16.89	12.45	0	21.53	18.87	0	23.02	28.18	15.17	0	3.93	20.22	16.74	50.4	22.95	2.73	0	0	12.02	45.96	0	17.15	63.39	0	30.6	33.66	44.63	10.25	11.5	3.07	12.87	5.01	34.91	0	38.11	0	0	0	12.12	5.48	0	14.01
ATP2A2	30.57	15.9	19.74	0	1.86	50.03	0	27.75	0	65.52	1.13	18.87	2.86	9.21	32.87	25.28	0	11.78	90.99	20.6	8.4	0	13.64	12.11	7.21	0	9.19	0	34.31	39.85	0	27.2	85.45	40.75	7.69	0	6.14	0	0	0	44.34	45.73	0	0	3.23	2.42	0	0	0
NT5DC1	7.86	0	3.29	0	40.95	0	1.88	32.58	0	0	9.07	0	5.71	18.41	0	22.75	0	0	23.59	14.16	0	0	24.56	36.34	0	0	0	0	0	14.49	0	6.8	7.77	32.99	23.06	23	70.64	0	5.01	0	35.47	72.41	0	0	58.21	79.97	5.48	0	0
NOL11	28.83	21.19	8.22	0	42.81	35.02	11.26	18.1	0	0	2.27	18.87	8.57	2.3	28.18	15.17	0	0	30.33	18.03	0	24.86	5.46	24.23	21.62	4.81	21.45	0	17.15	36.23	0	6.8	15.54	31.05	12.81	34.51	46.07	28.31	25.03	0	0	0	0	29.7	6.47	38.77	14.61	44.51	28.01
RAB3GAP1	11.36	18.55	14.8	0	35.36	2.5	1.88	24.13	12.45	0	7.93	9.43	5.71	25.32	4.7	12.64	0	11.78	47.18	20.6	67.2	21.04	24.56	4.04	38.43	2.4	6.13	0	0	28.98	0	20.4	64.73	40.75	20.5	19.17	36.86	0	0	0	2.96	0	0	38.19	0	41.2	0	20.54	42.02
C16orf72	12.23	5.3	3.29	0	0	17.51	5.63	2.41	0	0	4.53	56.61	19.99	0	42.26	15.17	0	7.85	70.77	2.58	0	0	19.1	20.19	60.05	0	0	0	0	50.72	0	37.4	56.96	52.39	23.06	0	0	0	0	0	2.96	41.92	3.81	0	3.23	0	0	0	0
TMEM19	8.73	15.9	8.22	0	29.78	7.5	0	8.45	37.34	23.12	10.2	37.74	14.28	25.32	18.78	7.58	0	7.85	26.96	28.33	29.4	11.48	13.64	24.23	0	2.4	30.64	0	8.58	23.55	0	0	7.77	5.82	7.69	3.83	36.86	36.03	0	0	0	68.6	0	59.4	0	9.69	12.79	37.66	3.5
TEX2	19.22	37.09	9.87	0	42.81	47.53	0	19.31	0	0	2.27	18.87	8.57	0	46.96	27.81	0	23.55	23.59	2.58	0	0	35.47	12.11	12.01	2.4	0	0	51.46	43.47	0	13.6	72.5	36.87	30.75	0	6.14	0	70.08	4.99	14.78	30.49	0	0	0	0	7.31	0	0
GALC	28.83	29.14	3.29	0	42.81	17.51	9.38	48.26	0	3.85	20.4	28.3	0	6.91	4.7	5.06	0	0	20.22	7.73	29.4	0	8.19	0	0	19.23	15.32	0	8.58	19.92	0	17	7.77	23.29	15.38	0	36.86	2.57	10.01	44.88	23.65	0	22.85	0	6.47	72.7	18.27	0	7
SMG1	0.87	26.49	6.58	0	35.36	0	24.4	22.93	24.9	19.27	45.34	9.43	17.13	13.81	4.7	22.75	0	0	40.44	9.01	8.4	17.21	0	28.26	0	0	15.32	0	0	77.88	0	6.8	38.84	38.81	10.25	26.84	0	0	0	0	0	49.54	0	38.19	0	0	0	0	84.04
G2E3	11.36	0	9.87	0	13.03	7.5	0	25.34	0	30.83	28.33	0	17.13	9.21	37.57	27.81	0	7.85	37.07	12.88	8.4	0	0	0	45.64	21.64	18.38	0	0	47.09	0	6.8	38.84	44.63	17.94	0	27.64	0	0	0	20.69	22.87	0	42.43	0	0	31.05	30.81	0
FURIN	13.98	47.69	9.87	0	14.89	2.5	9.38	16.89	0	19.27	34	0	0	27.62	18.78	22.75	0	15.7	20.22	27.04	0	66.94	30.01	32.3	0	14.42	39.83	0	0	19.92	0	13.6	25.89	15.52	2.56	0	0	10.29	0	64.82	17.74	3.81	0	4.24	0	16.96	10.96	0	0
HPS1	37.56	13.25	21.38	0	11.17	25.02	11.26	24.13	0	42.39	19.27	18.87	5.71	11.51	4.7	7.58	0	19.63	10.11	32.19	25.2	19.13	16.37	40.38	0	14.42	6.13	0	8.58	14.49	0	3.4	15.54	13.58	12.81	3.83	0	0	0	4.99	26.61	3.81	34.28	21.21	3.23	31.5	5.48	0	24.51
NOMO1	13.1	13.25	26.31	0	31.64	42.53	15.01	13.27	0	19.27	3.4	9.43	8.57	16.11	28.18	30.34	0	23.55	53.92	12.88	29.4	36.34	0	16.15	4.8	0	3.06	0	0	32.6	0	13.6	62.14	21.35	0	7.67	0	0	0	69.81	8.87	3.81	26.66	8.49	0	31.5	10.96	0	3.5
BNIP1	38.43	0	4.93	0	16.75	12.51	18.77	1.21	0	61.67	0	0	0	11.51	14.09	32.87	0	0	6.74	3.86	4.2	26.78	0	12.11	0	0	18.38	0	0	19.92	0	17	12.95	11.64	25.63	0	0	23.16	0	0	5.91	38.11	0	55.16	12.94	0	56.63	0	0
TYW1	13.98	5.3	9.87	0	7.44	0	1.88	1.21	0	7.71	14.73	0	51.4	25.32	28.18	40.45	0	27.48	16.85	11.59	29.4	11.48	21.83	8.08	14.41	52.89	0	0	0	48.9	0	3.4	12.95	42.69	15.38	46.01	46.07	0	10.01	39.89	38.43	0	0	29.7	0	33.93	12.79	0	10.5
AFTPH	15.72	10.6	32.89	0	11.17	32.52	15.01	10.86	24.9	3.85	7.93	47.17	2.86	18.41	56.35	17.7	0	15.7	53.92	21.89	0	0	0	0	52.84	21.64	12.25	0	17.15	47.09	0	27.2	28.48	58.22	20.5	0	0	0	0	0	0	0	0	0	32.34	0	0	0	10.5
KRIT1	23.58	7.95	16.45	0	16.75	2.5	11.26	7.24	211.61	38.54	19.27	0	2.86	20.72	0	15.17	0	19.63	50.55	6.44	0	26.78	0	0	14.41	21.64	0	0	0	39.85	0	10.2	31.07	21.35	20.5	3.83	0	0	5.01	0	23.65	0	7.62	0	9.7	9.69	5.48	0	52.52
AMIGO2	27.95	15.9	72.36	0	16.75	37.52	13.14	42.23	0	0	30.6	0	8.57	0	32.87	5.06	0	3.93	13.48	0	0	11.48	35.47	0	36.03	2.4	0	0	0	3.62	0	23.8	49.2	27.17	69.19	0	6.14	0	0	0	32.52	15.24	0	0	16.17	0	0	0	28.01
C15orf39	17.47	21.19	9.87	0	9.31	20.01	7.51	6.03	0	19.27	21.53	28.3	28.56	4.6	4.7	30.34	0	3.93	0	7.73	4.2	0	0	0	0	9.62	12.25	0	0	38.04	0	0	18.12	19.41	12.81	3.83	9.21	38.6	0	0	11.82	19.05	34.28	16.97	32.34	19.39	0	54.78	24.51
RNF25	6.11	15.9	6.58	0	0	60.04	15.01	4.83	12.45	30.83	29.47	0	2.86	4.6	4.7	0	0	0	10.11	6.44	0	21.04	21.83	56.53	0	12.02	21.45	0	51.46	3.62	0	3.4	20.71	1.94	12.81	0	0	2.57	15.02	49.87	2.96	19.05	0	8.49	3.23	4.85	3.65	41.08	0
TMEM254	13.98	37.09	6.58	0	16.75	25.02	37.54	37.4	12.45	15.42	56.67	37.74	42.84	29.92	14.09	10.11	0	27.48	0	6.44	21	30.6	0	16.15	7.21	12.02	9.19	0	0	5.43	0	27.2	20.71	7.76	17.94	19.17	30.71	0	0	0	73.9	22.87	30.47	0	0	0	0	0	0
FGFR1OP2	17.47	5.3	29.6	0	13.03	0	16.89	12.07	0	38.54	28.33	47.17	8.57	2.3	9.39	27.81	0	7.85	16.85	41.21	0	28.69	27.28	12.11	60.05	12.02	0	0	17.15	27.17	0	0	2.59	34.93	25.63	23	52.21	0	15.02	0	0	0	3.81	12.73	32.34	0	9.13	41.08	31.51
HOMER1	23.58	2.65	13.16	0	20.47	10.01	16.89	9.65	74.69	3.85	9.07	18.87	17.13	6.91	37.57	5.06	0	0	67.4	0	33.6	0	0	52.49	0	21.64	0	0	8.58	18.11	0	13.6	36.25	36.87	30.75	0	61.43	28.31	0	0	32.52	0	0	8.49	51.75	0	25.57	3.42	52.52
TMEM222	8.73	26.49	16.45	0	9.31	15.01	0	9.65	0	0	10.2	0	19.99	20.72	0	15.17	0	39.26	13.48	25.75	4.2	47.82	21.83	28.26	12.01	14.42	12.25	0	17.15	18.11	0	13.6	23.3	27.17	5.13	0	107.49	0	0	0	2.96	22.87	41.9	46.67	38.81	2.42	9.13	0	31.51
GIPC1	25.33	7.95	11.51	0	22.33	25.02	24.4	3.62	0	0	39.67	9.43	0	13.81	28.18	32.87	0	27.48	37.07	15.45	0	17.21	0	0	16.81	55.3	12.25	0	17.15	67.02	0	20.4	82.86	13.58	12.81	0	0	15.44	15.02	0	14.78	22.87	26.66	46.67	0	2.42	0	0	0
INSIG2	21.84	26.49	18.09	0	9.31	27.52	16.89	6.03	0	7.71	4.53	18.87	5.71	2.3	28.18	15.17	0	0	43.81	7.73	21	0	46.38	0	12.01	0	49.02	0	42.89	21.74	0	10.2	20.71	9.7	25.63	30.67	6.14	0	25.03	0	26.61	38.11	22.85	4.24	9.7	12.12	1.83	3.42	0
MSRB2	12.23	2.65	8.22	0	1.86	0	0	21.72	0	0	17	28.3	11.42	18.41	9.39	30.34	0	3.93	50.55	14.16	54.6	1.91	21.83	4.04	36.03	76.93	18.38	0	0	52.53	0	23.8	33.66	65.98	17.94	0	0	0	0	0	2.96	0	0	46.67	0	0	1.83	0	0
PSMG4	30.57	7.95	50.98	0	24.2	0	13.14	26.55	0	3.85	2.27	0	0	9.21	18.78	40.45	0	0	16.85	29.62	16.8	45.9	16.37	0	19.21	16.83	55.15	0	51.46	16.3	0	6.8	25.89	19.41	30.75	0	33.78	51.47	0	0	0	49.54	0	42.43	38.81	19.39	7.31	0	0
TERF1	9.61	15.9	19.74	0	20.47	32.52	13.14	1.21	37.34	0	44.2	0	0	4.6	9.39	20.23	0	31.41	10.11	15.45	29.4	43.99	30.01	32.3	0	26.45	6.13	0	0	32.6	0	10.2	15.54	32.99	10.25	0	0	30.88	0	0	23.65	0	45.7	0	45.28	12.12	25.57	78.74	0
CRTC3	28.83	26.49	8.22	0	9.31	0	7.51	18.1	12.45	0	20.4	0	5.71	11.51	4.7	17.7	0	3.93	13.48	9.01	37.8	13.39	0	0	33.63	9.62	33.7	0	8.58	47.09	0	6.8	33.66	62.1	20.5	88.18	0	30.88	0	0	0	0	3.81	25.46	9.7	21.81	20.09	61.62	70.03
ZNF131	29.7	15.9	4.93	0	9.31	20.01	1.88	19.31	0	26.98	17	9.43	28.56	36.83	23.48	45.51	0	7.85	23.59	27.04	0	28.69	16.37	16.15	14.41	28.85	0	0	8.58	52.53	0	20.4	20.71	60.16	35.88	0	3.07	25.74	0	29.92	20.69	3.81	41.9	0	0	14.54	21.92	58.2	28.01
ALG6	27.08	15.9	21.38	0	16.75	37.52	39.41	19.31	12.45	0	3.4	0	31.41	16.11	4.7	22.75	0	19.63	16.85	9.01	71.4	22.95	16.37	12.11	0	7.21	0	0	8.58	18.11	0	23.8	5.18	11.64	20.5	0	46.07	0	5.01	24.93	0	0	7.62	59.4	0	26.66	14.61	23.96	0
ECI1	22.71	37.09	27.96	0	37.22	0	0	8.45	0	0	26.07	0	11.42	27.62	0	42.98	0	15.7	20.22	2.58	12.6	45.9	70.94	24.23	28.82	0	3.06	0	51.46	50.72	0	0	36.25	25.23	5.13	3.83	3.07	0	0	0	11.82	41.92	0	16.97	19.4	21.81	1.83	23.96	0
NIPAL1	15.72	15.9	0	0	35.36	2.5	3.75	27.75	0	7.71	13.6	0	5.71	0	4.7	22.75	0	70.66	3.37	48.93	0	9.56	16.37	12.11	21.62	0	58.21	0	60.04	25.36	0	3.4	25.89	36.87	7.69	3.83	3.07	0	0	24.93	11.82	49.54	0	38.19	6.47	106.63	27.4	0	45.52
PARP1	15.72	34.44	6.58	0	63.28	10.01	16.89	73.6	12.45	0	64.6	47.17	2.86	16.11	0	65.74	0	7.85	30.33	32.19	0	7.65	114.6	0	12.01	0	0	0	0	45.28	0	3.4	25.89	11.64	10.25	0	61.43	0	0	0	5.91	3.81	15.23	0	0	0	31.05	0	14.01
TCTA	18.34	15.9	52.63	0	16.75	5	0	16.89	0	23.12	18.13	56.61	48.55	13.81	18.78	7.58	0	23.55	26.96	28.33	0	38.25	70.94	0	2.4	2.4	0	0	8.58	19.92	0	0	18.12	13.58	7.69	0	64.5	2.57	10.01	0	56.17	7.62	15.23	8.49	0	4.85	0	51.35	3.5
IARS	21.84	18.55	14.8	0	35.36	0	5.63	20.51	0	3.85	22.67	18.87	22.85	6.91	4.7	20.23	0	0	26.96	18.03	50.4	11.48	10.91	0	26.42	0	24.51	0	8.58	45.28	0	3.4	33.66	17.46	35.88	7.67	18.43	38.6	5.01	74.8	5.91	34.3	26.66	8.49	12.94	36.35	14.61	0	31.51
TXNL4A	36.69	0	0	0	7.44	15.01	7.51	25.34	0	0	14.73	0	28.56	23.02	28.18	37.92	0	15.7	23.59	20.6	8.4	17.21	19.1	0	14.41	28.85	0	0	0	18.11	0	34	56.96	25.23	30.75	0	21.5	12.87	0	89.76	47.3	15.24	0	0	0	16.96	10.96	0	28.01
GOLGA1	26.2	5.3	14.8	0	0	10.01	13.14	10.86	0	7.71	39.67	0	28.56	0	4.7	45.51	0	19.63	20.22	60.52	0	0	32.74	24.23	26.42	40.87	21.45	0	42.89	34.41	0	3.4	25.89	54.33	12.81	38.34	43	0	0	64.82	0	38.11	0	25.46	9.7	33.93	29.23	0	0
RASSF6	15.72	5.3	0	0	44.67	47.53	13.14	21.72	37.34	0	48.74	0	37.12	4.6	28.18	32.87	0	15.7	30.33	5.15	0	11.48	2.73	4.04	7.21	0	3.06	0	94.35	50.72	0	0	25.89	23.29	15.38	0	3.07	0	0	0	38.43	0	11.43	0	42.04	65.43	1.83	0	59.53
HUNK	4.37	18.55	6.58	0	29.78	15.01	16.89	34.99	12.45	53.96	23.8	0	28.56	27.62	0	7.58	0	27.48	33.7	50.22	0	3.83	13.64	4.04	9.61	4.81	3.06	0	68.62	67.02	0	6.8	56.96	27.17	2.56	0	82.92	12.87	30.04	0	8.87	0	60.94	29.7	9.7	0	27.4	0	3.5
SRM	27.95	18.55	34.54	0	1.86	0	0	8.45	0	65.52	12.47	18.87	0	18.41	42.26	20.23	0	15.7	43.81	59.23	16.8	3.83	2.73	4.04	4.8	36.06	6.13	0	0	36.23	0	17	62.14	29.11	7.69	0	3.07	0	10.01	0	50.25	0	0	4.24	3.23	0	10.96	0	0
RREB1	34.94	0	13.16	0	27.92	15.01	41.29	0	24.9	0	4.53	28.3	25.7	39.13	28.18	7.58	0	0	70.77	16.74	16.8	47.82	0	24.23	40.83	14.42	55.15	0	17.15	38.04	0	13.6	38.84	58.22	5.13	0	3.07	2.57	0	0	0	7.62	19.04	8.49	42.04	0	18.27	30.81	28.01
CYTH3	12.23	0	13.16	0	11.17	40.03	3.75	1.21	0	19.27	5.67	84.91	19.99	32.22	28.18	32.87	0	0	50.55	33.48	0	0	24.56	28.26	40.83	9.62	0	0	0	52.53	0	34	88.03	31.05	28.19	46.01	0	10.29	0	0	2.96	3.81	30.47	0	12.94	24.23	18.27	3.42	17.51
CRK	48.92	0	6.58	0	18.61	30.02	11.26	9.65	0	3.85	7.93	47.17	8.57	20.72	37.57	20.23	0	3.93	70.77	9.01	21	26.78	27.28	0	21.62	19.23	15.32	0	8.58	59.77	0	20.4	62.14	38.81	15.38	0	0	0	0	29.92	2.96	0	19.04	0	25.87	0	0	0	0
WIPF2	13.98	37.09	3.29	0	27.92	2.5	0	24.13	0	34.69	37.4	9.43	2.86	4.6	4.7	10.11	0	0	30.33	2.58	0	7.65	0	4.04	4.8	12.02	0	0	0	38.04	0	20.4	20.71	29.11	10.25	3.83	61.43	0	20.02	0	8.87	45.73	144.73	16.97	25.87	26.66	0	68.47	28.01
PELI1	17.47	0	11.51	0	5.58	0	46.92	18.1	0	0	55.54	28.3	5.71	4.6	14.09	35.4	0	11.78	3.37	5.15	4.2	1.91	13.64	4.04	4.8	0	45.96	0	17.15	18.11	0	3.4	46.61	23.29	0	0	6.14	15.44	30.04	0	8.87	19.05	11.43	42.43	0	26.66	20.09	23.96	63.03
ITSN1	6.99	13.25	13.16	0	1.86	22.51	18.77	39.82	0	3.85	10.2	56.61	5.71	11.51	37.57	25.28	0	19.63	16.85	2.58	16.8	5.74	49.11	28.26	33.63	0	0	0	0	30.79	0	27.2	12.95	25.23	48.69	61.34	95.21	2.57	0	0	0	0	60.94	4.24	0	21.81	3.65	0	14.01
EVL	45.42	23.84	9.87	0	40.95	20.01	11.26	10.86	49.79	0	22.67	18.87	2.86	0	37.57	32.87	0	11.78	23.59	15.45	4.2	15.3	19.1	0	7.21	12.02	12.25	0	8.58	25.36	0	6.8	46.61	15.52	17.94	0	33.78	46.33	0	49.87	0	0	0	0	29.11	0	0	10.27	3.5
SLMAP	11.36	18.55	32.89	0	3.72	12.51	13.14	10.86	0	0	15.87	9.43	5.71	36.83	46.96	15.17	0	31.41	60.66	18.03	0	9.56	13.64	28.26	48.04	12.02	0	0	51.46	56.15	0	27.2	46.61	54.33	20.5	38.34	0	0	0	0	44.34	26.68	0	21.21	9.7	14.54	1.83	0	66.53
PRUNE2	33.19	39.74	42.76	0	1.86	102.57	7.51	8.45	0	0	71.4	84.91	0	0	84.53	25.28	0	3.93	121.33	6.44	0	0	46.38	0	14.41	4.81	0	0	0	61.58	0	27.2	85.45	32.99	15.38	0	0	0	30.04	49.87	0	0	0	4.24	3.23	4.85	0	0	0
SENP6	11.36	0	44.41	0	18.61	20.01	20.64	3.62	24.9	0	29.47	18.87	5.71	29.92	37.57	40.45	0	3.93	64.03	16.74	54.6	34.43	2.73	0	2.4	60.1	0	0	0	45.28	0	10.2	54.37	50.45	28.19	0	0	0	0	0	23.65	30.49	3.81	80.61	0	0	1.83	23.96	10.5
UBE3A	28.83	5.3	26.31	0	20.47	0	18.77	2.41	0	0	17	9.43	0	4.6	23.48	22.75	0	23.55	30.33	36.05	84	11.48	0	16.15	50.44	0	0	0	0	59.77	0	23.8	77.68	34.93	7.69	49.84	18.43	36.03	0	0	50.25	0	0	8.49	9.7	0	29.23	10.27	0
ARF3	20.96	15.9	29.6	0	11.17	50.03	9.38	2.41	0	0	11.33	0	0	25.32	28.18	15.17	0	19.63	26.96	12.88	37.8	3.83	19.1	28.26	2.4	45.68	12.25	0	8.58	50.72	0	20.4	46.61	17.46	7.69	0	0	5.15	0	59.84	38.43	22.87	0	16.97	22.64	24.23	3.65	0	0
ANO10	27.08	58.29	24.67	0	40.95	7.5	35.66	33.78	0	15.42	5.67	0	25.7	23.02	9.39	17.7	0	19.63	40.44	28.33	21	17.21	19.1	8.08	16.81	24.04	18.38	0	34.31	36.23	0	20.4	36.25	34.93	30.75	80.51	0	0	0	0	8.87	26.68	0	0	0	24.23	10.96	3.42	14.01
TRAK1	8.73	45.04	3.29	0	20.47	15.01	0	25.34	62.24	11.56	31.73	47.17	34.27	16.11	0	17.7	0	35.33	16.85	2.58	4.2	19.13	35.47	76.71	4.8	7.21	18.38	0	34.31	38.04	0	6.8	5.18	23.29	2.56	3.83	21.5	0	0	79.78	47.3	26.68	0	0	3.23	0	56.63	0	0
GPC1	65.51	13.25	9.87	0	46.53	7.5	0	14.48	112.03	0	55.54	9.43	11.42	16.11	4.7	37.92	0	15.7	13.48	21.89	4.2	11.48	24.56	44.41	40.83	0	0	0	0	32.6	0	13.6	12.95	32.99	2.56	15.34	3.07	33.46	10.01	0	0	0	0	12.73	0	0	51.15	0	7
UBA6	6.99	10.6	29.6	0	27.92	0	18.77	9.65	74.69	0	17	9.43	28.56	23.02	23.48	20.23	0	3.93	43.81	37.34	12.6	15.3	16.37	8.08	36.03	74.53	6.13	0	0	41.66	0	17	41.43	40.75	17.94	0	0	0	0	0	8.87	3.81	11.43	12.73	16.17	16.96	9.13	6.85	38.52
MMP15	21.84	42.39	6.58	0	31.64	15.01	15.01	18.1	12.45	7.71	2.27	18.87	8.57	43.73	61.05	15.17	0	3.93	195.47	5.15	12.6	1.91	40.93	0	12.01	4.81	0	0	0	19.92	0	129.19	28.48	67.92	43.56	0	0	18.02	0	0	5.91	0	3.81	0	0	2.42	0	0	0
LLGL2	16.6	2.65	27.96	0	3.72	2.5	7.51	9.65	37.34	0	20.4	0	19.99	25.32	14.09	25.28	0	43.18	26.96	14.16	0	13.39	51.84	12.11	2.4	0	0	0	0	74.26	0	6.8	28.48	25.23	17.94	0	30.71	46.33	60.07	64.82	0	34.3	26.66	0	0	24.23	31.05	0	38.52
PGAP2	22.71	52.99	3.29	0	52.11	5	20.64	20.51	0	23.12	37.4	0	8.57	13.81	18.78	5.06	0	51.04	6.74	41.21	50.4	5.74	5.46	56.53	14.41	16.83	24.51	0	0	27.17	0	6.8	10.36	19.41	15.38	0	12.29	12.87	95.11	0	5.91	0	0	59.4	19.4	19.39	14.61	0	7
RRAS2	22.71	10.6	24.67	0	18.61	0	0	36.2	112.03	0	24.93	0	5.71	39.13	32.87	30.34	0	43.18	50.55	12.88	37.8	7.65	0	12.11	2.4	0	3.06	0	34.31	45.28	0	37.4	64.73	34.93	46.13	0	0	30.88	0	49.87	26.61	87.65	0	8.49	0	0	9.13	0	21.01
TWIST2	4.37	0	3.29	0	37.22	10.01	30.03	0	37.34	23.12	0	18.87	5.71	6.91	4.7	63.21	0	3.93	10.11	12.88	0	26.78	8.19	40.38	24.02	0	0	0	0	7.25	0	44.2	23.3	21.35	7.69	46.01	6.14	0	25.03	0	0	41.92	3.81	0	80.85	89.66	9.13	0	192.59
GRK4	47.17	10.6	9.87	0	53.97	17.51	0	28.96	0	0	52.14	0	82.82	39.13	0	0	0	19.63	0	30.9	0	30.6	35.47	60.56	28.82	48.08	0	0	34.31	3.62	0	10.2	20.71	9.7	5.13	7.67	33.78	0	0	0	70.95	26.68	0	0	0	0	0	6.85	3.5
PPP1R1C	37.56	39.74	52.63	0	1.86	17.51	33.78	7.24	0	65.52	3.4	37.74	14.28	13.81	9.39	2.53	0	23.55	13.48	0	0	22.95	32.74	32.3	2.4	132.23	27.57	0	42.89	16.3	0	0	7.77	17.46	15.38	0	18.43	0	0	0	14.78	26.68	0	0	0	14.54	7.31	112.98	31.51
MED13	20.09	47.69	4.93	0	0	57.54	13.14	2.41	12.45	26.98	18.13	9.43	2.86	11.51	37.57	10.11	0	7.85	53.92	11.59	25.2	3.83	51.84	8.08	52.84	2.4	3.06	0	8.58	30.79	0	44.2	36.25	46.57	20.5	0	24.57	0	0	79.78	0	45.73	3.81	4.24	0	36.35	12.79	0	0
FOXO1	19.22	0	13.16	0	1.86	47.53	24.4	3.62	0	0	4.53	0	5.71	0	61.05	68.26	0	19.63	117.96	6.44	4.2	0	54.57	0	52.84	26.45	0	0	8.58	30.79	0	34	44.02	60.16	51.25	53.68	3.07	0	60.07	34.91	0	0	0	0	22.64	2.42	27.4	0	0
PPP1CC	43.67	0	27.96	0	0	27.52	5.63	0	0	0	35.13	9.43	2.86	20.72	9.39	17.7	0	7.85	60.66	18.03	0	0	8.19	32.3	21.62	2.4	24.51	0	68.62	47.09	0	17	28.48	60.16	7.69	7.67	0	54.05	0	64.82	2.96	3.81	38.09	0	38.81	16.96	0	0	66.53
IFIT5	13.98	0	3.29	0	52.11	10.01	7.51	24.13	0	26.98	22.67	0	8.57	11.51	37.57	45.51	0	23.55	16.85	12.88	46.2	3.83	16.37	36.34	0	0	24.51	0	8.58	18.11	0	6.8	15.54	32.99	12.81	49.84	24.57	18.02	0	4.99	14.78	57.16	15.23	21.21	42.04	29.08	31.05	54.78	7
UBXN8	11.36	13.25	19.74	0	31.64	15.01	1.88	26.55	0	0	28.33	0	5.71	0	37.57	37.92	0	7.85	13.48	16.74	16.8	5.74	0	24.23	21.62	0	9.19	0	145.82	19.92	0	20.4	31.07	31.05	23.06	0	33.78	7.72	40.05	0	44.34	22.87	30.47	12.73	0	16.96	0	0	0
LAMB2	38.43	0	3.29	0	24.2	0	11.26	26.55	37.34	57.81	15.87	0	31.41	2.3	32.87	42.98	0	27.48	30.33	25.75	0	32.51	16.37	0	14.41	7.21	0	0	17.15	34.41	0	20.4	7.77	25.23	28.19	26.84	67.57	10.29	5.01	4.99	76.86	3.81	0	0	35.57	36.35	36.53	0	10.5
SLC20A1	12.23	7.95	36.18	0	59.56	12.51	5.63	21.72	0	3.85	68	9.43	45.69	2.3	89.23	37.92	0	11.78	57.29	7.73	25.2	0	46.38	4.04	14.41	31.25	3.06	0	8.58	56.15	0	27.2	31.07	21.35	30.75	0	9.21	2.57	10.01	24.93	0	60.97	0	4.24	0	24.23	12.79	0	10.5
METAP1	20.09	10.6	8.22	0	57.7	35.02	26.27	45.85	0	0	41.94	0	19.99	18.41	32.87	17.7	0	39.26	40.44	24.47	100.8	9.56	24.56	12.11	14.41	14.42	0	0	0	36.23	0	27.2	20.71	13.58	25.63	0	0	15.44	0	24.93	20.69	38.11	53.32	4.24	3.23	50.89	27.4	0	3.5
CACUL1	11.36	21.19	19.74	0	1.86	0	3.75	25.34	0	46.25	14.73	47.17	2.86	0	46.96	32.87	0	27.48	40.44	52.79	92.4	28.69	5.46	0	0	21.64	21.45	0	34.31	30.79	0	6.8	36.25	21.35	12.81	99.68	0	33.46	5.01	0	14.78	0	41.9	0	6.47	24.23	0	3.42	0
SMPDL3A	48.92	7.95	49.34	0	14.89	10.01	9.38	0	0	0	56.67	0	31.41	0	28.18	42.98	0	0	33.7	42.49	71.4	9.56	10.91	0	19.21	31.25	3.06	0	8.58	12.68	0	27.2	31.07	27.17	33.31	46.01	9.21	0	0	0	0	0	11.43	25.46	9.7	0	12.79	23.96	24.51
TRIM33	37.56	31.79	11.51	0	16.75	12.51	0	10.86	124.48	0	45.34	47.17	22.85	2.3	56.35	27.81	0	3.93	26.96	25.75	0	22.95	0	0	12.01	26.45	45.96	0	0	34.41	0	30.6	51.79	64.04	15.38	0	3.07	2.57	0	59.84	0	7.62	26.66	50.91	0	0	16.44	0	0
RAD51B	13.98	29.14	9.87	0	35.36	10.01	43.17	32.58	12.45	42.39	2.27	18.87	11.42	13.81	4.7	45.51	0	31.41	3.37	28.33	0	15.3	70.94	16.15	26.42	0	36.76	0	0	18.11	0	17	12.95	15.52	38.44	23	18.43	0	15.02	74.8	0	0	0	0	9.7	38.77	14.61	0	3.5
LINC00116	35.81	15.9	11.51	0	33.5	50.03	48.8	18.1	0	46.25	7.93	0	2.86	25.32	18.78	40.45	0	11.78	26.96	12.88	0	21.04	70.94	0	36.03	2.4	30.64	0	0	21.74	0	17	36.25	17.46	33.31	0	3.07	41.18	0	4.99	85.73	0	53.32	4.24	19.4	0	31.05	0	21.01
ITGA3	5.24	21.19	34.54	0	11.17	52.53	67.56	24.13	37.34	69.37	6.8	84.91	0	13.81	28.18	7.58	0	19.63	20.22	15.45	0	0	0	0	88.87	0	6.13	0	17.15	43.47	0	17	31.07	29.11	7.69	49.84	0	5.15	5.01	4.99	14.78	0	11.43	0	16.17	0	1.83	3.42	3.5
VEGFB	16.6	0	6.58	0	42.81	30.02	0	0	0	73.23	1.13	75.48	0	16.11	0	5.06	0	3.93	6.74	5.15	21	17.21	0	56.53	0	2.4	12.25	0	0	14.49	0	6.8	31.07	9.7	17.94	0	0	23.16	0	0	0	0	99.03	16.97	16.17	19.39	38.36	0	0
MRPL50	29.7	18.55	23.03	0	26.06	25.02	0	9.65	0	42.39	11.33	56.61	0	41.43	18.78	45.51	0	7.85	10.11	9.01	21	22.95	0	8.08	36.03	33.66	24.51	0	17.15	9.06	0	6.8	12.95	13.58	15.38	0	27.64	0	55.07	0	14.78	60.97	0	38.19	0	19.39	25.57	0	45.52
NBEAL1	12.23	76.83	24.67	0	5.58	32.52	0	21.72	0	0	2.27	0	45.69	0	14.09	58.15	0	0	13.48	9.01	0	13.39	54.57	40.38	16.81	16.83	0	0	60.04	50.72	0	3.4	7.77	40.75	23.06	0	89.07	0	0	0	0	72.41	15.23	0	0	24.23	45.67	147.21	0
TRIM28	28.83	21.19	0	0	20.47	20.01	39.41	0	0	0	49.87	94.34	17.13	9.21	42.26	30.34	0	54.96	23.59	0	4.2	3.83	57.3	0	2.4	4.81	0	0	25.73	57.96	0	34	46.61	36.87	15.38	3.83	12.29	15.44	0	4.99	0	34.3	26.66	0	16.17	0	20.09	0	31.51
TSKU	18.34	0	0	0	13.03	0	15.01	0	0	15.42	6.8	0	17.13	0	0	7.58	0	3.93	3.37	15.45	75.6	7.65	0	8.08	0	57.7	0	0	0	30.79	0	10.2	0	17.46	2.56	69.01	43	0	0	19.95	0	3.81	0	16.97	109.96	60.58	10.96	89.01	31.51
FNBP1	18.34	2.65	27.96	0	35.36	25.02	31.91	9.65	87.13	46.25	5.67	84.91	0	18.41	37.57	27.81	0	27.48	47.18	37.34	0	19.13	19.1	12.11	12.01	9.62	0	0	25.73	28.98	0	3.4	36.25	27.17	17.94	0	55.28	28.31	0	14.96	20.69	0	19.04	0	16.17	31.5	1.83	37.66	45.52
BCKDHA	20.96	0	4.93	0	16.75	0	13.14	6.03	0	11.56	3.4	0	34.27	46.04	14.09	22.75	0	3.93	3.37	0	46.2	28.69	0	4.04	0	36.06	12.25	0	17.15	23.55	0	6.8	12.95	17.46	5.13	0	6.14	72.06	30.04	0	2.96	38.11	114.26	0	12.94	12.12	29.23	68.47	28.01
OSMR	27.08	7.95	19.74	0	18.61	47.53	0	6.03	0	53.96	26.07	9.43	5.71	23.02	32.87	20.23	0	15.7	87.62	6.44	0	1.91	0	44.41	0	0	15.32	0	34.31	101.43	0	23.8	31.07	29.11	23.06	30.67	30.71	43.75	5.01	64.82	17.74	0	0	4.24	48.51	21.81	0	0	10.5
DNAJB12	34.07	13.25	24.67	0	27.92	22.51	26.27	8.45	12.45	3.85	7.93	0	17.13	6.91	18.78	20.23	0	31.41	26.96	19.31	84	15.3	10.91	8.08	24.02	0	0	0	51.46	34.41	0	20.4	25.89	21.35	23.06	0	79.85	2.57	0	79.78	29.56	19.05	3.81	12.73	6.47	12.12	10.96	6.85	45.52
KIAA2013	34.07	0	3.29	0	7.44	40.03	13.14	1.21	62.24	0	9.07	37.74	2.86	11.51	37.57	42.98	0	3.93	77.51	1.29	0	17.21	32.74	48.45	0	0	21.45	0	17.15	43.47	0	27.2	69.91	36.87	17.94	0	0	23.16	15.02	0	50.25	0	0	4.24	9.7	0	9.13	0	38.52
YWHAH	26.2	23.84	70.72	0	24.2	12.51	26.27	27.75	0	0	17	18.87	8.57	27.62	37.57	27.81	0	7.85	94.37	10.3	0	3.83	35.47	0	0	14.42	27.57	0	51.46	36.23	0	3.4	49.2	62.1	51.25	0	30.71	7.72	35.04	4.99	20.69	30.49	0	55.16	0	26.66	27.4	44.51	0
ESYT2	22.71	15.9	24.67	0	9.31	5	73.19	30.17	0	34.69	14.73	0	8.57	23.02	37.57	48.04	0	23.55	43.81	32.19	12.6	53.55	35.47	40.38	0	7.21	15.32	0	25.73	79.7	0	23.8	59.55	34.93	17.94	15.34	18.43	0	0	4.99	17.74	15.24	0	38.19	54.98	4.85	31.05	6.85	0
YTHDF3	29.7	5.3	21.38	0	5.58	0	11.26	47.06	12.45	23.12	20.4	47.17	11.42	50.64	18.78	25.28	0	7.85	50.55	25.75	0	5.74	16.37	8.08	12.01	0	6.13	0	0	38.04	0	57.79	62.14	46.57	25.63	34.51	27.64	7.72	5.01	0	35.47	22.87	49.51	0	32.34	58.16	54.8	85.59	7
CRELD2	68.13	29.14	105.26	0	3.72	32.52	24.4	82.05	74.69	0	1.13	9.43	5.71	9.21	28.18	7.58	0	3.93	50.55	20.6	8.4	15.3	38.2	24.23	43.23	0	24.51	0	0	21.74	0	51	25.89	44.63	15.38	0	9.21	0	35.04	9.97	26.61	3.81	0	0	0	26.66	42.01	3.42	0
LOC645553	28.83	31.79	0	0	22.33	2.5	5.63	32.58	24.9	42.39	57.8	9.43	39.98	0	0	126.42	0	39.26	16.85	2.58	4.2	32.51	103.68	0	4.8	2.4	0	0	102.93	63.39	0	3.4	10.36	54.33	0	95.85	24.57	5.15	0	0	26.61	0	22.85	0	0	19.39	12.79	0	59.53
EFEMP1	42.8	2.65	14.8	0	42.81	77.55	28.15	13.27	12.45	61.67	69.14	0	14.28	71.35	4.7	17.7	0	43.18	30.33	16.74	0	5.74	27.28	56.53	76.86	0	36.76	0	0	1.81	0	91.79	28.48	27.17	25.63	3.83	3.07	36.03	0	19.95	0	26.68	0	4.24	0	31.5	0	0	70.03
PIGK	45.42	31.79	19.74	0	67	17.51	0	3.62	0	0	44.2	18.87	19.99	46.04	46.96	25.28	0	19.63	20.22	33.48	25.2	28.69	54.57	20.19	31.22	38.47	3.06	0	0	25.36	0	27.2	41.43	25.23	74.32	0	3.07	0	0	29.92	14.78	41.92	0	0	25.87	24.23	12.79	37.66	14.01
SEMA4B	26.2	5.3	0	0	31.64	40.03	39.41	37.4	0	11.56	15.87	9.43	19.99	9.21	18.78	15.17	0	3.93	33.7	27.04	0	28.69	13.64	24.23	2.4	48.08	49.02	0	25.73	67.02	0	34	28.48	36.87	25.63	3.83	33.78	41.18	0	0	8.87	57.16	7.62	21.21	42.04	50.89	0	6.85	3.5
C4orf19	11.36	2.65	18.09	0	20.47	15.01	11.26	15.69	0	0	10.2	0	5.71	6.91	14.09	118.83	0	0	57.29	12.88	50.4	1.91	21.83	0	14.41	19.23	21.45	0	0	79.7	0	17	23.3	48.51	25.63	92.02	9.21	0	115.14	0	0	7.62	3.81	29.7	16.17	26.66	31.05	0	24.51
NIN	24.46	7.95	3.29	0	3.72	50.03	3.75	27.75	0	3.85	13.6	0	31.41	34.53	28.18	20.23	0	23.55	87.62	23.18	12.6	13.39	8.19	0	19.21	21.64	0	0	42.89	23.55	0	34	75.09	75.68	33.31	0	0	7.72	0	84.77	2.96	19.05	22.85	21.21	45.28	0	36.53	0	24.51
TMEM214	16.6	15.9	6.58	0	24.2	10.01	0	16.89	62.24	0	11.33	103.78	5.71	4.6	14.09	22.75	0	39.26	117.96	6.44	46.2	32.51	8.19	0	0	76.93	21.45	0	0	43.47	0	44.2	56.96	54.33	41	0	15.36	10.29	25.03	0	26.61	0	0	0	29.11	2.42	47.49	3.42	38.52
KCNK12	29.7	7.95	29.6	0	20.47	2.5	11.26	14.48	0	0	37.4	28.3	0	6.91	9.39	17.7	0	7.85	10.11	5.15	0	30.6	10.91	8.08	57.64	0	0	0	25.73	21.74	0	0	116.52	31.05	17.94	0	0	0	0	0	0	11.43	3.81	12.73	6.47	4.85	1.83	3.42	56.03
KPNA1	33.19	0	42.76	0	16.75	25.02	11.26	37.4	0	3.85	9.07	56.61	25.7	11.51	42.26	30.34	0	11.78	43.81	23.18	12.6	9.56	32.74	28.26	45.64	9.62	15.32	0	25.73	52.53	0	6.8	49.2	40.75	53.82	46.01	3.07	0	35.04	14.96	29.56	22.87	3.81	0	9.7	29.08	20.09	17.12	14.01
GNB2	40.18	29.14	14.8	0	5.58	2.5	22.52	0	87.13	3.85	23.8	84.91	5.71	20.72	51.66	40.45	0	47.11	30.33	3.86	25.2	7.65	16.37	4.04	36.03	16.83	58.21	0	8.58	36.23	0	17	77.68	34.93	23.06	0	0	10.29	40.05	0	59.12	0	11.43	25.46	3.23	26.66	9.13	3.42	14.01
LCMT1	29.7	37.09	9.87	0	9.31	15.01	28.15	25.34	12.45	0	0	18.87	37.12	32.22	18.78	48.04	0	35.33	16.85	18.03	0	19.13	49.11	28.26	43.23	0	39.83	0	17.15	27.17	0	6.8	20.71	40.75	33.31	23	18.43	0	60.07	0	20.69	19.05	91.41	0	54.98	14.54	34.71	0	3.5
TLE1	13.1	23.84	16.45	0	39.09	5	0	6.03	0	0	0	18.87	0	18.41	18.78	5.06	0	31.41	30.33	0	0	0	38.2	28.26	45.64	24.04	42.89	0	25.73	9.06	0	61.19	18.12	42.69	17.94	218.54	0	0	0	134.64	0	30.49	41.9	59.4	25.87	0	0	17.12	17.51
SMNDC1	9.61	2.65	39.47	0	1.86	30.02	15.01	18.1	0	7.71	15.87	18.87	65.68	13.81	28.18	30.34	0	23.55	50.55	21.89	12.6	22.95	54.57	4.04	4.8	28.85	18.38	0	8.58	43.47	0	23.8	38.84	48.51	56.38	7.67	12.29	12.87	0	0	5.91	0	22.85	29.7	32.34	33.93	0	61.62	115.55
PAFAH1B1	23.58	66.23	65.79	0	14.89	30.02	3.75	16.89	0	23.12	35.13	0	0	11.51	65.74	30.34	0	27.48	111.22	21.89	46.2	5.74	5.46	0	24.02	16.83	30.64	0	0	61.58	0	54.39	80.27	38.81	38.44	3.83	3.07	2.57	0	0	20.69	0	34.28	0	6.47	9.69	0	34.24	17.51
OSBP	34.94	42.39	8.22	0	63.28	7.5	67.56	25.34	0	7.71	19.27	28.3	19.99	4.6	65.74	12.64	0	15.7	74.14	23.18	33.6	0	16.37	12.11	0	40.87	24.51	0	8.58	72.45	0	17	62.14	56.28	25.63	23	3.07	18.02	0	39.89	8.87	3.81	34.28	38.19	3.23	41.2	9.13	0	14.01
NKIRAS1	57.65	15.9	18.09	0	50.25	0	15.01	6.03	0	0	7.93	0	117.09	4.6	23.48	15.17	0	19.63	3.37	46.36	42	30.6	0	80.75	19.21	12.02	0	0	0	10.87	0	20.4	49.2	23.29	28.19	0	36.86	2.57	0	0	0	95.27	34.28	33.94	0	0	27.4	58.2	0
SS18L2	48.04	18.55	32.89	0	22.33	25.02	80.7	47.06	0	30.83	15.87	28.3	17.13	13.81	0	32.87	0	23.55	13.48	5.15	25.2	5.74	40.93	16.15	16.81	62.51	18.38	0	8.58	43.47	0	23.8	20.71	32.99	30.75	0	0	41.18	0	0	47.3	41.92	3.81	25.46	90.55	31.5	1.83	3.42	35.02
ARID4A	26.2	15.9	13.16	0	27.92	2.5	0	1.21	0	19.27	26.07	0	31.41	39.13	14.09	22.75	0	31.41	23.59	46.36	50.4	32.51	21.83	88.83	62.45	16.83	21.45	0	8.58	39.85	0	10.2	31.07	64.04	25.63	0	0	30.88	0	0	53.21	0	129.5	0	51.75	19.39	32.88	20.54	0
PARP4	8.73	111.27	24.67	0	18.61	7.5	15.01	34.99	0	34.69	15.87	37.74	28.56	59.85	18.78	12.64	0	0	37.07	10.3	21	26.78	27.28	16.15	0	9.62	3.06	0	0	59.77	0	0	72.5	38.81	23.06	42.17	27.64	5.15	0	0	14.78	76.22	30.47	21.21	0	2.42	34.71	54.78	0
BIRC2	24.46	10.6	24.67	0	33.5	30.02	35.66	26.55	161.82	69.37	32.87	0	45.69	25.32	32.87	15.17	0	0	47.18	41.21	16.8	0	21.83	4.04	33.63	16.83	24.51	0	42.89	67.02	0	10.2	41.43	23.29	28.19	7.67	0	61.77	20.02	0	8.87	22.87	0	4.24	19.4	36.35	74.89	3.42	10.5
DPP7	21.84	18.55	0	0	9.31	2.5	9.38	6.03	62.24	92.5	0	0	51.4	6.91	4.7	15.17	0	11.78	6.74	1.29	4.2	59.29	0	20.19	0	0	52.08	0	0	12.68	0	6.8	10.36	7.76	2.56	84.35	30.71	46.33	15.02	4.99	50.25	15.24	68.56	72.13	38.81	33.93	3.65	30.81	3.5
TRIM21	6.99	18.55	34.54	0	89.34	27.52	43.17	22.93	0	0	15.87	0	31.41	39.13	14.09	20.23	0	23.55	16.85	6.44	0	0	46.38	28.26	0	14.42	12.25	0	0	41.66	0	20.4	15.54	46.57	15.38	61.34	0	20.59	45.05	39.89	0	0	3.81	12.73	42.04	12.12	58.45	51.35	7
F2RL1	20.09	0	46.05	0	26.06	157.6	39.41	25.34	0	0	19.27	0	0	6.91	150.27	12.64	0	62.81	74.14	12.88	0	11.48	38.2	0	88.87	24.04	0	0	17.15	14.49	0	47.6	5.18	11.64	23.06	0	30.71	0	50.06	64.82	0	11.43	11.43	0	0	9.69	104.12	0	14.01
CCNYL1	31.45	26.49	34.54	0	14.89	75.05	7.51	57.92	12.45	3.85	37.4	56.61	2.86	0	65.74	27.81	0	23.55	161.77	10.3	8.4	11.48	13.64	0	28.82	45.68	27.57	0	8.58	56.15	0	34	67.32	110.61	33.31	0	36.86	46.33	0	0	0	7.62	0	4.24	6.47	21.81	29.23	10.27	14.01
MBD3	55.9	37.09	3.29	0	48.39	27.52	22.52	24.13	0	15.42	17	9.43	31.41	0	46.96	25.28	0	3.93	23.59	21.89	4.2	17.21	19.1	8.08	21.62	57.7	0	0	0	39.85	0	23.8	59.55	46.57	20.5	0	70.64	84.93	0	59.84	5.91	22.87	0	42.43	0	12.12	18.27	3.42	17.51
LMAN2L	21.84	52.99	19.74	0	39.09	25.02	45.04	4.83	0	46.25	30.6	0	22.85	23.02	14.09	15.17	0	27.48	43.81	16.74	37.8	40.16	0	20.19	7.21	31.25	21.45	0	42.89	28.98	0	54.39	33.66	46.57	48.69	0	52.21	0	0	4.99	29.56	0	7.62	0	0	26.66	0	0	14.01
DMXL1	10.48	37.09	4.93	0	11.17	7.5	50.67	54.3	87.13	0	15.87	18.87	8.57	9.21	14.09	30.34	0	3.93	33.7	10.3	8.4	0	38.2	0	21.62	55.3	0	0	17.15	52.53	0	20.4	25.89	31.05	30.75	65.18	3.07	12.87	0	0	20.69	3.81	3.81	0	0	7.27	27.4	0	21.01
TTC19	47.17	13.25	16.45	0	31.64	2.5	13.14	18.1	74.69	0	28.33	122.65	22.85	18.41	18.78	35.4	0	3.93	67.4	54.08	12.6	66.94	16.37	8.08	0	31.25	15.32	0	0	50.72	0	3.4	59.55	25.23	20.5	3.83	3.07	0	0	4.99	44.34	80.03	0	0	3.23	24.23	45.67	0	35.02
REEP1	27.08	15.9	37.83	0	14.89	20.01	22.52	16.89	0	0	26.07	0	34.27	6.91	65.74	55.62	0	7.85	87.62	1.29	117.6	7.65	106.41	4.04	14.41	0	18.38	0	77.2	45.28	0	67.99	54.37	19.41	112.76	0	3.07	0	0	0	0	0	0	0	3.23	48.47	42.01	0	21.01
MTA3	26.2	15.9	8.22	0	29.78	40.03	54.43	24.13	12.45	30.83	13.6	18.87	11.42	25.32	46.96	22.75	0	15.7	30.33	9.01	37.8	61.2	73.67	20.19	12.01	2.4	36.76	0	0	48.9	0	6.8	20.71	25.23	25.63	0	33.78	56.62	5.01	4.99	0	26.68	0	4.24	19.4	19.39	120.56	30.81	0
PBRM1	31.45	45.04	4.93	0	14.89	15.01	20.64	27.75	0	0	48.74	103.78	19.99	0	37.57	27.81	0	3.93	64.03	12.88	0	5.74	16.37	32.3	33.63	33.66	0	0	8.58	38.04	0	20.4	36.25	79.56	30.75	0	0	2.57	0	54.85	0	49.54	57.13	0	12.94	0	1.83	85.59	0
SNRNP35	22.71	0	11.51	0	13.03	55.04	30.03	0	0	3.85	54.4	0	34.27	36.83	32.87	70.79	0	19.63	26.96	47.64	0	15.3	49.11	56.53	50.44	38.47	107.23	0	17.15	39.85	0	71.39	12.95	17.46	30.75	11.5	0	0	0	0	14.78	45.73	15.23	46.67	51.75	24.23	5.48	3.42	10.5
ALDH9A1	26.2	39.74	32.89	0	31.64	27.52	15.01	63.95	0	3.85	30.6	9.43	11.42	62.15	4.7	17.7	0	11.78	3.37	36.05	0	24.86	0	24.23	45.64	31.25	30.64	0	25.73	16.3	0	17	62.14	21.35	17.94	49.84	24.57	0	45.05	0	59.12	114.33	15.23	42.43	0	12.12	0	0	0
TIAL1	17.47	31.79	21.38	0	13.03	40.03	54.43	10.86	24.9	11.56	24.93	0	34.27	6.91	51.66	17.7	0	23.55	43.81	23.18	4.2	9.56	38.2	56.53	0	9.62	15.32	0	25.73	68.83	0	10.2	90.62	65.98	28.19	3.83	9.21	12.87	0	34.91	20.69	11.43	41.9	21.21	9.7	2.42	23.75	17.12	35.02
DENND4C	55.9	10.6	1.64	0	26.06	62.54	15.01	21.72	0	3.85	47.6	18.87	42.84	20.72	28.18	17.7	0	47.11	30.33	0	0	0	8.19	20.19	14.41	31.25	0	0	17.15	117.73	0	40.8	77.68	87.32	51.25	26.84	0	51.47	10.01	0	0	30.49	19.04	38.19	6.47	33.93	10.96	0	0
LRRC8A	57.65	26.49	47.69	0	5.58	5	28.15	22.93	0	3.85	32.87	75.48	0	25.32	103.31	10.11	0	3.93	30.33	38.63	8.4	7.65	5.46	0	38.43	0	0	0	17.15	16.3	0	6.8	176.07	25.23	17.94	19.17	0	41.18	0	4.99	2.96	11.43	7.62	4.24	12.94	2.42	102.29	6.85	17.51
OSGIN2	27.95	23.84	13.16	0	9.31	10.01	67.56	4.83	0	0	68	47.17	19.99	11.51	0	53.09	0	35.33	23.59	28.33	4.2	76.5	73.67	4.04	0	33.66	0	0	0	105.05	0	13.6	49.2	40.75	41	0	24.57	108.09	20.02	0	29.56	15.24	3.81	12.73	61.45	12.12	5.48	0	0
GKN1	10.48	47.69	80.59	0	113.53	22.51	30.03	26.55	12.45	3.85	3.4	0	14.28	2.3	145.58	7.58	0	23.55	155.03	10.3	50.4	15.3	92.77	36.34	38.43	12.02	18.38	0	60.04	3.62	0	27.2	25.89	64.04	71.75	0	6.14	0	0	49.87	2.96	0	0	0	0	0	0	0	3.5
CPQ	22.71	13.25	39.47	0	27.92	30.02	31.91	44.64	0	3.85	51	0	31.41	39.13	9.39	32.87	0	47.11	20.22	15.45	4.2	42.08	8.19	16.15	64.85	14.42	73.53	0	34.31	50.72	0	23.8	20.71	34.93	12.81	76.68	49.14	0	0	0	47.3	110.51	11.43	0	19.4	55.74	1.83	0	45.52
SUZ12	33.19	18.55	6.58	0	0	22.51	35.66	13.27	124.48	3.85	24.93	9.43	8.57	20.72	4.7	42.98	0	23.55	43.81	21.89	92.4	0	10.91	8.08	19.21	28.85	0	0	51.46	90.56	0	23.8	44.02	91.2	48.69	7.67	30.71	0	0	0	0	49.54	57.13	42.43	3.23	0	31.05	0	3.5
ERC1	21.84	21.19	47.69	0	63.28	60.04	0	47.06	0	0	20.4	66.04	0	0	51.66	27.81	0	7.85	94.37	29.62	21	26.78	19.1	8.08	19.21	52.89	15.32	0	34.31	61.58	0	64.59	88.03	67.92	69.19	0	73.71	0	0	0	17.74	15.24	34.28	12.73	0	2.42	42.01	3.42	0
RNF11	69.01	2.65	29.6	0	44.67	30.02	30.03	27.75	0	0	24.93	28.3	2.86	4.6	28.18	40.45	0	23.55	77.51	20.6	0	19.13	60.03	0	21.62	36.06	9.19	0	51.46	72.45	0	44.2	56.96	17.46	48.69	7.67	0	18.02	90.11	0	29.56	80.03	3.81	4.24	12.94	21.81	21.92	30.81	24.51
FAM207A	35.81	82.13	18.09	0	55.84	15.01	45.04	12.07	0	11.56	13.6	0	57.12	75.96	51.66	32.87	0	102.07	16.85	38.63	0	7.65	73.67	4.04	62.45	57.7	27.57	0	77.2	7.25	0	23.8	7.77	31.05	17.94	0	73.71	54.05	5.01	0	14.78	72.41	45.7	0	0	9.69	67.59	3.42	0
IRF2BPL	34.07	15.9	3.29	0	50.25	77.55	7.51	31.37	49.79	11.56	14.73	9.43	5.71	18.41	28.18	48.04	0	15.7	57.29	63.1	0	24.86	13.64	48.45	31.22	4.81	0	0	17.15	90.56	0	44.2	90.62	81.5	35.88	0	36.86	12.87	5.01	39.89	0	3.81	38.09	50.91	6.47	16.96	65.76	0	21.01
BCAR3	33.19	34.44	14.8	0	0	67.54	37.54	9.65	99.58	7.71	0	28.3	5.71	41.43	9.39	60.68	0	27.48	20.22	11.59	4.2	34.43	30.01	8.08	12.01	14.42	55.15	0	0	70.64	0	20.4	25.89	56.28	17.94	15.34	86	0	40.05	24.93	2.96	3.81	99.03	59.4	42.04	29.08	0	34.24	17.51
DENND5A	40.18	29.14	21.38	0	14.89	32.52	48.8	14.48	112.03	73.23	17	56.61	11.42	16.11	65.74	78.38	0	7.85	40.44	1.29	0	22.95	73.67	28.26	36.03	2.4	12.25	0	17.15	81.51	0	27.2	77.68	31.05	12.81	0	0	48.9	0	0	2.96	22.87	7.62	0	25.87	14.54	20.09	0	17.51
TOR1AIP1	21.84	2.65	42.76	0	37.22	80.05	71.32	48.26	0	26.98	61.2	18.87	37.12	46.04	32.87	37.92	0	54.96	23.59	23.18	54.6	11.48	32.74	16.15	0	60.1	0	0	51.46	39.85	0	40.8	51.79	29.11	53.82	34.51	6.14	23.16	25.03	14.96	26.61	22.87	64.75	8.49	6.47	0	5.48	20.54	38.52
TRIB1	17.47	29.14	27.96	0	18.61	27.52	16.89	0	0	0	11.33	18.87	48.55	0	140.88	53.09	0	0	37.07	25.75	50.4	0	21.83	28.26	14.41	36.06	0	0	34.31	21.74	0	40.8	442.76	38.81	10.25	0	0	0	20.02	0	17.74	0	0	0	0	0	43.84	44.51	0
SHROOM3	20.96	13.25	21.38	0	57.7	55.04	18.77	6.03	37.34	0	29.47	103.78	11.42	16.11	46.96	42.98	0	31.41	40.44	60.52	16.8	13.39	13.64	24.23	55.24	0	27.57	0	0	115.92	0	23.8	189.02	67.92	30.75	0	12.29	2.57	0	34.91	0	3.81	19.04	0	9.7	12.12	10.96	58.2	21.01
ARHGAP21	37.56	0	49.34	0	5.58	65.04	15.01	30.17	0	19.27	5.67	28.3	39.98	29.92	37.57	70.79	0	11.78	114.59	38.63	88.2	40.16	5.46	36.34	2.4	0	27.57	0	25.73	81.51	0	78.19	132.05	81.5	41	0	0	12.87	45.05	4.99	29.56	0	7.62	4.24	0	46.04	31.05	0	21.01
ACVRL1	27.95	34.44	37.83	0	13.03	47.53	24.4	8.45	0	0	43.07	18.87	11.42	0	117.4	146.64	0	0	33.7	29.62	0	42.08	10.91	4.04	31.22	0	0	0	0	164.82	0	0	292.59	71.8	23.06	0	0	0	0	109.7	0	0	0	0	25.87	0	85.85	3.42	0
SLCO4A1	4.37	13.25	1.64	0	13.03	0	76.95	0	0	73.23	1.13	0	25.7	29.92	4.7	17.7	0	0	10.11	3.86	0	28.69	24.56	20.19	0	0	134.8	0	0	41.66	0	0	2.59	29.11	2.56	0	0	7.72	0	59.84	47.3	232.46	19.04	241.84	3.23	24.23	91.33	34.24	14.01
LIFR	5.24	18.55	16.45	0	24.2	25.02	13.14	62.74	0	0	46.47	56.61	34.27	50.64	0	58.15	0	0	141.55	10.3	50.4	0	35.47	0	7.21	48.08	61.27	0	42.89	110.49	0	40.8	95.8	65.98	38.44	11.5	0	0	80.1	124.66	8.87	0	11.43	0	12.94	9.69	76.72	3.42	3.5
CEACAM1	24.46	39.74	77.3	0	61.42	0	11.26	3.62	0	0	22.67	66.04	22.85	62.15	42.26	48.04	0	0	26.96	38.63	8.4	22.95	0	16.15	9.61	0	42.89	0	25.73	43.47	0	17	18.12	32.99	94.82	0	6.14	66.91	15.02	4.99	17.74	49.54	0	4.24	12.94	7.27	1.83	0	98.04
PHACTR2	40.18	5.3	47.69	0	0	30.02	0	13.27	62.24	0	37.4	28.3	2.86	43.73	18.78	60.68	0	39.26	101.11	37.34	4.2	26.78	27.28	0	19.21	21.64	3.06	0	8.58	36.23	0	37.4	62.14	85.38	28.19	0	0	46.33	5.01	4.99	8.87	38.11	0	4.24	0	48.47	27.4	0	10.5
MRPL47	98.71	21.19	41.12	0	16.75	30.02	15.01	37.4	0	30.83	51	18.87	68.54	16.11	70.44	63.21	0	19.63	16.85	41.21	12.6	32.51	27.28	113.05	50.44	33.66	36.76	0	60.04	34.41	0	37.4	25.89	50.45	43.56	11.5	0	61.77	30.04	0	14.78	0	11.43	8.49	6.47	2.42	76.72	0	0
ZNFX1	30.57	18.55	13.16	0	52.11	32.52	43.17	19.31	0	0	40.8	0	11.42	25.32	42.26	58.15	0	31.41	60.66	34.77	21	40.16	62.75	64.6	24.02	12.02	15.32	0	68.62	54.34	0	0	93.21	98.97	43.56	0	110.57	12.87	0	0	0	0	0	38.19	0	24.23	45.67	30.81	7
IGSF3	42.8	5.3	44.41	0	29.78	100.07	48.8	13.27	0	19.27	61.2	9.43	8.57	11.51	32.87	37.92	0	27.48	131.44	12.88	8.4	19.13	103.68	20.19	36.03	24.04	30.64	0	17.15	65.21	0	71.39	113.93	87.32	33.31	0	49.14	64.34	0	4.99	0	0	3.81	0	84.09	9.69	16.44	0	21.01
LAMA5	31.45	18.55	0	0	13.03	0	43.17	24.13	0	42.39	7.93	75.48	11.42	36.83	0	136.53	0	15.7	40.44	32.19	16.8	30.6	30.01	8.08	55.24	14.42	61.27	0	8.58	103.24	0	27.2	20.71	44.63	17.94	38.34	6.14	0	50.06	0	0	11.43	19.04	4.24	45.28	99.36	7.31	51.35	3.5
EIF2AK1	48.04	29.14	18.09	0	24.2	40.03	45.04	42.23	0	23.12	73.67	18.87	14.28	23.02	32.87	25.28	0	7.85	50.55	55.37	16.8	19.13	35.47	16.15	31.22	7.21	24.51	0	42.89	59.77	0	23.8	59.55	108.67	28.19	0	30.71	48.9	0	69.81	32.52	0	26.66	0	58.21	9.69	16.44	133.52	31.51
TXNRD2	6.99	2.65	13.16	0	13.03	77.55	26.27	21.72	0	92.5	0	0	39.98	6.91	32.87	53.09	0	7.85	6.74	0	25.2	1.91	70.94	12.11	14.41	228.4	18.38	0	0	18.11	0	20.4	18.12	11.64	20.5	34.51	3.07	0	45.05	124.66	0	26.68	79.98	0	3.23	0	62.11	89.01	3.5
NAV2	46.3	2.65	8.22	0	26.06	32.52	65.69	48.26	62.24	19.27	87.27	66.04	14.28	11.51	42.26	15.17	0	7.85	111.22	23.18	0	9.56	5.46	28.26	16.81	2.4	3.06	0	51.46	97.81	0	23.8	103.57	87.32	48.69	3.83	95.21	84.93	15.02	89.76	0	15.24	49.51	0	22.64	26.66	56.63	0	84.04
OTUD1	103.95	7.95	21.38	0	24.2	122.58	73.19	9.65	12.45	0	24.93	94.34	59.97	20.72	79.83	37.92	0	3.93	40.44	69.53	0	0	0	36.34	88.87	4.81	6.13	0	0	54.34	0	23.8	220.09	81.5	30.75	30.67	3.07	2.57	0	0	8.87	0	34.28	0	45.28	24.23	149.79	0	17.51
BIRC7	2.62	0	0	0	0	2.5	1.88	0	0	0	0	75.48	0	0	4.7	25.28	0	0	6.74	2.58	0	0	0	0	0	0	15.32	0	0	5.43	0	13.6	0	34.93	0	291.39	27.64	2.57	275.33	244.34	0	26.68	45.7	0	122.89	4.85	0	0	38.52
CDK17	27.08	21.19	19.74	0	72.59	27.52	31.91	80.84	87.13	7.71	40.8	47.17	42.84	25.32	28.18	30.34	0	19.63	37.07	29.62	71.4	19.13	24.56	60.56	48.04	57.7	36.76	0	111.51	79.7	0	20.4	49.2	50.45	17.94	46.01	0	0	0	0	20.69	0	22.85	55.16	6.47	26.66	93.16	13.69	108.55
LINC00998	34.94	105.97	27.96	0	59.56	15.01	28.15	14.48	37.34	119.48	60.07	0	42.84	66.75	42.26	73.32	0	66.74	33.7	29.62	25.2	0	38.2	40.38	36.03	0	6.13	0	8.58	65.21	0	3.4	7.77	58.22	41	30.67	64.5	92.65	50.06	0	41.39	11.43	0	12.73	32.34	26.66	1.83	0	0
BAZ1A	35.81	0	4.93	0	11.17	5	48.8	4.83	62.24	0	28.33	9.43	39.98	6.91	28.18	32.87	0	19.63	134.81	63.1	4.2	11.48	8.19	8.08	60.05	12.02	15.32	0	0	38.04	0	54.39	119.11	81.5	17.94	53.68	0	20.59	0	4.99	76.86	0	3.81	42.43	0	9.69	73.07	95.86	14.01
BAMBI	23.58	0	88.81	0	22.33	70.05	0	6.03	87.13	0	21.53	84.91	0	16.11	14.09	7.58	0	7.85	87.62	10.3	4.2	0	35.47	4.04	48.04	0	33.7	0	60.04	9.06	0	23.8	170.89	9.7	38.44	199.37	3.07	0	15.02	19.95	0	0	57.13	46.67	64.68	24.23	16.44	160.91	59.53
ATL3	14.85	42.39	34.54	0	83.75	7.5	0	27.75	12.45	50.1	21.53	75.48	42.84	18.41	51.66	91.02	0	0	37.07	46.36	4.2	68.85	38.2	4.04	14.41	12.02	18.38	0	42.89	90.56	0	47.6	31.07	64.04	20.5	11.5	58.35	36.03	0	9.97	59.12	41.92	22.85	29.7	25.87	48.47	10.96	0	7
PTPRA	28.83	31.79	31.25	0	16.75	60.04	5.63	48.26	12.45	3.85	54.4	66.04	8.57	6.91	32.87	17.7	0	43.18	101.11	82.41	0	43.99	57.3	8.08	93.67	192.33	15.32	0	120.08	61.58	0	23.8	80.27	42.69	41	0	3.07	38.6	25.03	0	23.65	19.05	15.23	12.73	119.66	79.97	36.53	23.96	98.04
NOTCH2	55.03	82.13	47.69	0	96.78	60.04	13.14	53.09	0	77.08	17	47.17	11.42	25.32	28.18	25.28	0	54.96	101.11	94	0	3.83	49.11	32.3	40.83	14.42	30.64	0	51.46	126.79	0	17	308.12	62.1	20.5	0	0	15.44	5.01	0	5.91	26.68	152.35	0	74.38	9.69	10.96	0	0
HIPK3	31.45	7.95	18.09	0	55.84	17.51	39.41	31.37	0	34.69	45.34	37.74	14.28	23.02	65.74	80.91	0	19.63	57.29	37.34	0	34.43	2.73	44.41	55.24	16.83	24.51	0	0	114.11	0	27.2	113.93	104.79	35.88	7.67	6.14	28.31	25.03	0	14.78	26.68	19.04	93.34	19.4	36.35	9.13	75.32	56.03
FAM177A1	32.32	58.29	52.63	0	50.25	32.52	7.51	22.93	0	19.27	29.47	28.3	22.85	16.11	75.14	78.38	0	19.63	87.62	30.9	42	28.69	35.47	12.11	21.62	19.23	0	0	25.73	77.88	0	30.6	90.62	50.45	74.32	0	39.93	36.03	0	4.99	32.52	68.6	76.17	42.43	32.34	31.5	21.92	102.71	66.53
SGPP1	35.81	29.14	16.45	0	27.92	52.53	9.38	22.93	37.34	19.27	6.8	66.04	22.85	9.21	46.96	83.43	0	15.7	53.92	74.68	0	19.13	46.38	60.56	0	38.47	61.27	0	8.58	114.11	0	34	77.68	128.07	23.06	3.83	73.71	0	60.07	74.8	11.82	0	41.9	76.37	19.4	106.63	63.93	3.42	45.52
ZNF271P	57.65	52.99	57.56	0	61.42	20.01	18.77	32.58	0	11.56	7.93	18.87	62.83	20.72	89.23	80.91	0	19.63	37.07	38.63	16.8	78.42	21.83	8.08	0	84.15	33.7	0	60.04	76.07	0	37.4	46.61	44.63	43.56	0	15.36	43.75	45.05	0	65.03	68.6	0	21.21	100.26	46.04	51.15	0	28.01
HSPA4	34.94	50.34	4.93	0	52.11	25.02	24.4	57.92	0	0	52.14	47.17	22.85	48.34	9.39	45.51	0	35.33	37.07	48.93	25.2	5.74	38.2	84.79	50.44	48.08	36.76	0	51.46	50.72	0	34	49.2	62.1	53.82	46.01	30.71	12.87	50.06	9.97	53.21	0	41.9	0	87.32	26.66	31.05	78.74	21.01
LCP1	24.46	68.88	6.58	0	59.56	0	15.01	39.82	99.58	0	49.87	66.04	17.13	39.13	28.18	108.72	0	62.81	13.48	36.05	0	84.15	100.95	4.04	9.61	16.83	0	0	34.31	30.79	0	0	18.12	69.86	2.56	53.68	58.35	61.77	0	0	88.68	7.62	38.09	16.97	64.68	155.1	0	0	80.54
TMEM138	36.69	29.14	34.54	0	100.5	10.01	3.75	48.26	0	15.42	21.53	0	11.42	20.72	56.35	55.62	0	70.66	23.59	56.66	29.4	57.38	76.4	40.38	0	33.66	0	0	17.15	79.7	0	47.6	56.96	58.22	53.82	7.67	18.43	48.9	0	0	91.64	0	0	93.34	45.28	53.31	52.97	3.42	14.01
CBLB	27.08	76.83	23.03	0	102.37	2.5	43.17	55.5	49.79	19.27	37.4	94.34	85.67	23.02	14.09	17.7	0	19.63	20.22	92.71	0	65.03	24.56	109.01	52.84	62.51	254.29	0	17.15	45.28	0	17	56.96	11.64	7.69	0	24.57	2.57	0	14.96	11.82	11.43	0	118.8	45.28	53.31	12.79	0	171.58
GOLPH3	64.64	39.74	34.54	0	13.03	67.54	63.81	8.45	0	34.69	47.6	0	57.12	36.83	79.83	83.43	0	3.93	97.74	10.3	16.8	47.82	0	36.34	2.4	31.25	15.32	0	51.46	128.6	0	40.8	119.11	104.79	46.13	30.67	70.64	0	105.13	0	20.69	57.16	7.62	42.43	22.64	7.27	49.32	17.12	7
PPP2CB	22.71	29.14	70.72	0	39.09	147.6	18.77	26.55	12.45	84.79	57.8	103.78	0	23.02	145.58	60.68	0	47.11	121.33	56.66	16.8	7.65	68.21	8.08	57.64	28.85	0	0	0	105.05	0	51	139.82	77.62	30.75	15.34	101.35	48.9	0	4.99	0	30.49	30.47	4.24	6.47	4.85	12.79	20.54	0
GNB1	52.41	15.9	74.01	0	35.36	50.03	82.58	19.31	0	53.96	29.47	75.48	19.99	34.53	61.05	63.21	0	78.52	101.11	23.18	0	36.34	19.1	20.19	67.25	67.32	9.19	0	8.58	94.19	0	78.19	139.82	116.43	48.69	53.68	9.21	87.5	80.1	54.85	0	0	19.04	8.49	12.94	19.39	29.23	10.27	3.5
CFB	5.24	2.65	11.51	0	3.72	2.5	9.38	26.55	49.79	23.12	20.4	0	19.99	4.6	28.18	530.95	0	23.55	13.48	52.79	0	15.3	76.4	8.08	33.63	0	6.13	0	0	83.32	0	3.4	41.43	44.63	15.38	30.67	24.57	0	370.44	79.78	0	0	0	4.24	45.28	87.24	23.75	3.42	28.01
VCL	27.08	29.14	113.48	0	55.84	47.53	37.54	76.02	0	69.37	89.54	28.3	19.99	29.92	140.88	68.26	0	27.48	168.51	63.1	29.4	63.12	60.03	16.15	12.01	79.34	27.57	0	60.04	68.83	0	27.2	88.03	56.28	61.5	15.34	39.93	36.03	85.1	0	20.69	7.62	7.62	12.73	42.04	53.31	0	13.69	63.03
WDR41	50.66	21.19	100.32	0	94.92	47.53	75.07	38.61	37.34	53.96	65.74	37.74	2.86	0	103.31	118.83	0	15.7	30.33	29.62	0	0	46.38	0	38.43	4.81	3.06	0	102.93	67.02	0	23.8	59.55	21.35	30.75	26.84	58.35	0	30.04	0	20.69	0	0	33.94	93.79	92.09	104.12	0	133.06
NFYB	66.39	58.29	9.87	0	65.14	15.01	46.92	47.06	161.82	19.27	22.67	66.04	88.53	66.75	4.7	68.26	0	11.78	10.11	16.74	16.8	15.3	10.91	12.11	0	33.66	18.38	0	145.82	67.02	0	37.4	36.25	46.57	28.19	72.85	101.35	33.46	0	0	159.63	80.03	0	16.97	106.72	65.43	20.09	27.39	31.51
SNX10	44.55	45.04	3.29	0	53.97	25.02	65.69	0	49.79	11.56	68	169.82	25.7	25.32	4.7	15.17	0	35.33	40.44	12.88	42	47.82	84.58	32.3	16.81	67.32	33.7	0	188.7	101.43	0	10.2	28.48	79.56	10.25	0	12.29	51.47	0	4.99	2.96	41.92	57.13	21.21	74.38	94.51	42.01	82.16	38.52
ACLY	55.9	34.44	24.67	0	57.7	37.52	86.33	57.92	12.45	30.83	70.27	9.43	25.7	6.91	61.05	48.04	0	7.85	70.77	37.34	8.4	26.78	109.14	8.08	81.66	125.02	24.51	0	111.51	68.83	0	30.6	72.5	54.33	23.06	15.34	141.28	7.72	0	69.81	23.65	34.3	99.03	8.49	22.64	16.96	16.44	3.42	3.5
GSTA3	96.96	0	0	0	5.58	7.5	26.27	0	0	26.98	0	37.74	114.23	6.91	89.23	20.23	0	35.33	10.11	0	84	143.45	0	0	12.01	194.74	45.96	0	0	96	0	0	44.02	81.5	66.63	92.02	0	36.03	245.29	44.88	17.74	0	38.09	127.29	45.28	48.47	137	0	0
SMAD3	89.1	34.44	13.16	0	104.23	52.53	153.89	26.55	49.79	30.83	37.4	122.65	5.71	32.22	56.35	35.4	0	90.29	64.03	110.74	42	9.56	111.87	60.56	24.02	62.51	12.25	0	34.31	70.64	0	95.19	82.86	91.2	35.88	53.68	61.43	12.87	50.06	34.91	32.52	19.05	15.23	101.83	19.4	14.54	9.13	0	14.01
RGS2	6.99	0	8.22	0	13.03	15.01	16.89	0	24.9	0	7.93	18.87	31.41	0	0	17.7	0	0	3.37	0	4.2	0	0	113.05	0	0	370.71	0	0	3.62	0	132.59	15.54	11.64	5.13	0	95.21	0	0	0	0	19.05	41.9	84.86	0	0	0	68.47	42.02
PIGR	11.36	2.65	0	0	14.89	0	0	0	0	3.85	1.13	0	154.21	0	0	22.75	0	789.09	23.59	0	0	0	0	0	0	0	0	0	8.58	1.81	0	74.79	5.18	128.07	51.25	7.67	0	2.57	5.01	0	2.96	0	0	0	6.47	0	3.65	3.42	0
CREB5	48.04	68.88	14.8	0	26.06	37.52	61.93	34.99	37.34	26.98	11.33	94.34	114.23	48.34	9.39	75.85	0	58.89	37.07	99.15	0	26.78	19.1	32.3	72.06	100.97	0	0	34.31	72.45	0	10.2	85.45	161.06	23.06	34.51	61.43	0	0	29.92	153.72	60.97	49.51	4.24	0	21.81	100.47	20.54	3.5
KRT14	4.37	5.3	0	0	11.17	2.5	58.18	1.21	0	346.87	20.4	0	0	18.41	4.7	5.06	0	0	3.37	11.59	0	21.04	0	16.15	2.4	4.81	6.13	0	0	27.17	0	6.8	0	3.88	15.38	532.93	132.07	0	15.02	0	2.96	118.14	7.62	0	6.47	24.23	5.48	147.21	287.13
DCAF5	20.09	5.3	4.93	0	143.31	20.01	33.78	84.46	12.45	7.71	31.73	18.87	42.84	34.53	9.39	48.04	0	58.89	90.99	61.81	42	22.95	76.4	68.64	50.44	81.74	39.83	0	85.77	39.85	0	142.79	31.07	95.09	138.38	0	3.07	41.18	5.01	59.84	70.95	0	0	67.89	71.15	12.12	142.48	0	42.02
LYN	33.19	79.48	8.22	0	5.58	0	50.67	15.69	0	23.12	87.27	75.48	74.25	27.62	4.7	20.23	0	54.96	53.92	77.26	0	80.33	38.2	48.45	33.63	28.85	45.96	0	8.58	112.3	0	34	217.5	87.32	15.38	7.67	39.93	36.03	20.02	29.92	11.82	34.3	125.69	8.49	54.98	55.74	21.92	6.85	80.54
AHI1	40.18	7.95	47.69	0	16.75	27.52	48.8	39.82	0	3.85	17	47.17	0	34.53	46.96	103.66	0	54.96	67.4	30.9	4.2	3.83	5.46	12.11	19.21	60.1	0	0	0	86.94	0	37.4	41.43	69.86	89.69	0	27.64	0	125.15	69.81	32.52	45.73	72.37	46.67	200.51	96.93	131.52	37.66	126.06
PCBD1	62.89	148.36	98.68	0	46.53	5	56.3	47.06	99.58	19.27	77.07	0	62.83	32.22	37.57	65.74	0	51.04	47.18	32.19	8.4	15.3	79.13	88.83	26.42	0	18.38	0	34.31	32.6	0	34	23.3	64.04	35.88	11.5	98.28	10.29	170.2	0	32.52	0	3.81	42.43	93.79	138.13	34.71	27.39	28.01
SLC30A7	27.95	26.49	69.08	0	67	27.52	15.01	44.64	37.34	23.12	48.74	9.43	99.95	4.6	108.01	37.92	0	19.63	165.14	54.08	63	15.3	43.66	44.41	55.24	86.55	39.83	0	102.93	112.3	0	13.6	69.91	98.97	58.94	0	39.93	0	10.01	4.99	26.61	0	30.47	8.49	38.81	16.96	45.67	23.96	56.03
AP3B1	73.37	55.64	39.47	0	42.81	67.54	15.01	95.32	0	23.12	60.07	28.3	51.4	25.32	70.44	53.09	0	7.85	53.92	75.97	21	11.48	51.84	56.53	79.26	129.82	55.15	0	25.73	70.64	0	61.19	85.45	89.26	48.69	0	49.14	69.49	90.11	4.99	88.68	11.43	15.23	4.24	35.57	14.54	18.27	0	101.55
SLC38A9	43.67	5.3	42.76	0	48.39	125.08	54.43	57.92	0	15.42	57.8	66.04	42.84	39.13	37.57	40.45	0	39.26	10.11	23.18	71.4	15.3	16.37	48.45	72.06	55.3	52.08	0	68.62	28.98	0	88.39	98.39	40.75	53.82	0	61.43	64.34	25.03	0	8.87	49.54	30.47	16.97	164.94	60.58	149.79	30.81	49.02
H2AFY	87.35	7.95	16.45	0	26.06	30.02	24.4	27.75	0	50.1	22.67	28.3	102.81	16.11	89.23	27.81	0	82.44	84.25	72.11	42	0	46.38	16.15	24.02	60.1	24.51	0	17.15	92.37	0	61.19	155.36	102.85	71.75	46.01	82.92	18.02	0	54.85	50.25	53.35	49.51	0	6.47	179.33	47.49	0	59.53
ALAS1	34.94	47.69	21.38	0	16.75	10.01	73.19	41.02	149.37	84.79	24.93	103.78	28.56	4.6	32.87	37.92	0	7.85	26.96	23.18	0	28.69	100.95	4.04	148.92	72.12	45.96	0	102.93	34.41	0	23.8	31.07	79.56	5.13	7.67	187.35	87.5	65.08	0	26.61	0	26.66	50.91	19.4	38.77	23.75	0	45.52
TRIP12	48.04	2.65	39.47	0	55.84	35.02	1.88	50.68	0	30.83	48.74	18.87	28.56	6.91	98.62	75.85	0	15.7	57.29	38.63	29.4	32.51	30.01	60.56	93.67	144.25	21.45	0	42.89	119.54	0	67.99	72.5	139.72	69.19	61.34	9.21	87.5	20.02	0	0	38.11	83.79	21.21	64.68	50.89	93.16	68.47	3.5
PLA2G10	54.16	71.53	34.54	0	40.95	30.02	61.93	19.31	136.92	61.67	31.73	56.61	108.52	78.26	14.09	32.87	0	70.66	0	136.49	0	49.73	16.37	109.01	93.67	16.83	98.04	0	42.89	72.45	0	13.6	38.84	64.04	28.19	23	107.49	118.39	0	24.93	65.03	15.24	87.6	38.19	19.4	33.93	31.05	143.79	0
ANKRD13A	60.27	92.73	44.41	0	102.37	130.09	15.01	55.5	0	57.81	70.27	37.74	42.84	23.02	9.39	20.23	0	54.96	57.29	82.41	8.4	107.11	32.74	48.45	26.42	132.23	9.19	0	25.73	143.09	0	34	170.89	97.03	23.06	3.83	27.64	69.49	0	44.88	82.77	45.73	72.37	16.97	6.47	55.74	31.05	58.2	63.03
ALDH2	45.42	98.03	69.08	0	83.75	82.55	39.41	119.45	0	34.69	109.94	75.48	34.27	85.17	51.66	17.7	0	39.26	87.62	43.78	117.6	38.25	21.83	28.26	31.22	9.62	15.32	0	34.31	18.11	0	51	51.79	15.52	51.25	19.17	27.64	82.36	80.1	114.69	8.87	60.97	53.32	4.24	48.51	50.89	18.27	44.51	56.03
RBM47	87.35	18.55	1.64	0	59.56	20.01	39.41	47.06	112.03	0	53.27	75.48	74.25	32.22	9.39	58.15	0	62.81	10.11	82.41	0	1.91	62.75	24.23	50.44	103.38	79.66	0	25.73	88.75	0	13.6	90.62	91.2	12.81	23	73.71	30.88	0	79.78	50.25	26.68	114.26	33.94	100.26	70.28	20.09	20.54	119.05
ADAR	48.04	18.55	46.05	0	55.84	65.04	46.92	20.51	74.69	3.85	45.34	113.21	25.7	59.85	56.35	63.21	0	15.7	57.29	74.68	42	17.21	106.41	125.16	40.83	48.08	36.76	0	102.93	121.35	0	47.6	124.28	110.61	48.69	3.83	64.5	41.18	0	64.82	8.87	11.43	19.04	0	12.94	67.85	23.75	51.35	38.52
TRIM64B	1.75	13.25	1.64	0	0	45.03	1.88	196.68	248.95	115.62	3.4	18.87	322.7	0	9.39	12.64	0	0	3.37	127.48	0	11.48	0	4.04	0	151.46	98.04	0	0	10.87	0	0	7.77	7.76	17.94	3.83	0	0	80.1	49.87	0	0	262.8	284.27	0	9.69	43.84	0	3.5
CCNG2	77.74	0	4.93	0	13.03	95.06	129.5	34.99	112.03	42.39	108.8	66.04	11.42	23.02	51.66	30.34	0	0	97.74	33.48	0	9.56	16.37	28.26	19.21	31.25	15.32	0	128.66	47.09	0	115.59	113.93	93.15	64.07	65.18	3.07	48.9	30.04	19.95	2.96	11.43	0	21.21	54.98	16.96	38.36	0	73.53
TOR1B	39.31	10.6	59.21	0	42.81	105.07	46.92	94.12	37.34	30.83	62.34	47.17	19.99	32.22	126.79	27.81	0	58.89	185.36	55.37	42	11.48	114.6	44.41	38.43	24.04	18.38	0	77.2	68.83	0	67.99	62.14	60.16	76.88	38.34	36.86	7.72	155.19	9.97	35.47	22.87	49.51	42.43	12.94	29.08	27.4	0	56.03
GRHL1	73.37	29.14	9.87	0	68.86	27.52	61.93	59.12	298.74	34.69	103.14	9.43	31.41	64.45	51.66	5.06	0	66.74	20.22	75.97	42	15.3	13.64	48.45	2.4	31.25	42.89	0	60.04	103.24	0	13.6	49.2	89.26	12.81	0	64.5	18.02	10.01	0	88.68	41.92	205.67	25.46	29.11	109.05	91.33	99.28	49.02
NCOA1	60.27	13.25	13.16	0	52.11	175.12	54.43	7.24	99.58	50.1	53.27	66.04	45.69	20.72	89.23	58.15	0	23.55	111.22	24.47	58.8	34.43	57.3	24.23	40.83	144.25	15.32	0	77.2	126.79	0	34	129.46	120.31	51.25	0	9.21	102.95	45.05	54.85	26.61	53.35	3.81	0	12.94	9.69	133.35	102.71	0
NTN4	100.45	10.6	27.96	0	76.31	50.03	108.85	16.89	24.9	19.27	58.94	9.43	79.96	25.32	79.83	45.51	0	82.44	84.25	52.79	29.4	42.08	32.74	92.86	4.8	36.06	42.89	0	51.46	157.58	0	81.59	69.91	205.7	28.19	46.01	21.5	43.75	35.04	4.99	130.07	11.43	57.13	38.19	19.4	70.28	71.24	37.66	24.51
LINC01356	53.28	74.18	97.03	0	29.78	72.55	61.93	100.15	112.03	61.67	196.07	9.43	91.38	2.3	14.09	70.79	0	27.48	77.51	25.75	37.8	80.33	106.41	12.11	55.24	55.3	70.47	0	0	67.02	0	54.39	59.55	87.32	84.57	34.51	39.93	193.02	0	4.99	0	0	7.62	16.97	58.21	31.5	76.72	3.42	73.53
NECTIN2	36.69	34.44	59.21	0	35.36	92.56	16.89	39.82	49.79	34.69	28.33	18.87	8.57	0	103.31	65.74	0	15.7	239.28	12.88	33.6	24.86	62.75	0	98.48	12.02	36.76	0	77.2	106.86	0	84.99	173.48	98.97	64.07	95.85	86	12.87	55.07	104.72	23.65	49.54	0	0	22.64	43.62	20.09	0	56.03
NES	28.83	95.38	34.54	0	186.12	0	245.86	92.91	74.69	0	119	0	17.13	6.91	4.7	2.53	0	208.07	40.44	130.05	0	7.65	283.76	48.45	36.03	2.4	12.25	187.02	231.59	34.41	0	17	295.18	65.98	10.25	0	64.5	25.74	0	0	0	91.46	3.81	4.24	0	0	0	0	59.53
BDP1	41.93	5.3	106.9	0	39.09	62.54	48.8	63.95	24.9	7.71	66.87	47.17	42.84	13.81	51.66	58.15	0	11.78	104.48	50.22	0	53.55	79.13	40.38	50.44	2.4	0	0	102.93	121.35	0	20.4	137.23	141.66	56.38	53.68	125.92	2.57	5.01	0	35.47	30.49	121.88	97.59	0	43.62	49.32	41.08	84.04
SMIM7	75.99	52.99	37.83	0	39.09	30.02	45.04	55.5	0	30.83	40.8	0	105.66	48.34	61.05	96.08	0	51.04	57.29	56.66	54.6	74.59	51.84	88.83	31.22	93.76	98.04	0	8.58	94.19	0	67.99	41.43	64.04	92.25	76.68	70.64	97.8	135.16	0	103.46	7.62	60.94	0	42.04	36.35	69.41	47.93	129.56
LIPA	66.39	23.84	90.46	0	178.67	105.07	9.38	89.29	12.45	165.72	77.07	47.17	39.98	101.28	9.39	83.43	0	19.63	124.7	97.86	75.6	30.6	117.32	32.3	91.27	48.08	36.76	0	137.24	57.96	0	30.6	36.25	100.91	64.07	57.51	3.07	66.91	40.05	54.85	115.29	99.08	3.81	76.37	32.34	60.58	56.63	0	59.53
NEXN	58.52	21.19	340.44	0	37.22	42.53	22.52	49.47	12.45	0	36.27	0	17.13	78.26	159.67	134	0	43.18	192.1	60.52	29.4	97.54	158.25	64.6	98.48	88.95	0	0	308.78	115.92	0	0	98.39	116.43	79.44	3.83	92.14	33.46	30.04	0	56.17	38.11	34.28	4.24	0	0	259.39	3.42	70.03
SLC39A8	57.65	52.99	29.6	0	39.09	67.54	69.44	26.55	87.13	46.25	124.67	207.56	28.56	64.45	18.78	103.66	0	7.85	23.59	42.49	0	112.84	79.13	100.94	9.61	64.91	24.51	0	42.89	217.35	0	30.6	80.27	137.78	10.25	49.84	119.78	0	105.13	54.85	67.99	41.92	83.79	16.97	45.28	101.78	14.61	102.71	49.02
KCTD12	45.42	50.34	75.65	0	83.75	75.05	110.73	47.06	0	3.85	160.94	160.39	157.07	119.69	0	50.57	0	35.33	26.96	54.08	0	137.71	98.22	100.94	62.45	137.04	0	0	120.08	114.11	0	34	233.03	151.36	15.38	0	104.42	23.16	40.05	129.65	124.16	80.03	30.47	55.16	38.81	58.16	0	23.96	14.01
MSMO1	37.56	21.19	128.28	0	50.25	75.05	1.88	82.05	0	127.18	32.87	9.43	51.4	39.13	103.31	32.87	0	39.26	128.07	46.36	231.01	30.6	158.25	20.19	38.43	26.45	33.7	0	68.62	34.41	0	30.6	20.71	52.39	143.51	19.17	104.42	30.88	50.06	54.85	44.34	22.87	49.51	67.89	77.62	82.39	336.11	20.54	52.52
AFAP1	91.72	52.99	3.29	0	65.14	80.05	60.06	195.47	112.03	111.77	94.07	56.61	85.67	41.43	42.26	128.94	0	31.41	23.59	99.15	0	110.93	30.01	100.94	24.02	96.17	58.21	0	17.15	112.3	0	112.19	129.46	110.61	33.31	0	27.64	0	0	14.96	62.08	76.22	255.18	46.67	38.81	33.93	42.01	174.6	35.02
LRP10	101.33	119.22	118.41	0	89.34	70.05	30.03	88.08	87.13	123.33	71.4	94.34	34.27	52.94	183.15	65.74	0	47.11	219.06	24.47	105	30.6	90.04	4.04	26.42	64.91	21.45	0	120.08	94.19	0	105.39	321.07	112.55	38.44	7.67	3.07	48.9	40.05	109.7	73.9	19.05	0	0	109.96	31.5	38.36	27.39	7
DNAJB11	59.4	113.92	175.98	0	50.25	52.53	0	85.67	0	73.23	12.47	28.3	22.85	71.35	117.4	70.79	0	51.04	232.54	126.19	176.41	78.42	60.03	80.75	134.5	67.32	39.83	0	77.2	114.11	0	220.98	85.45	89.26	110.19	3.83	55.28	20.59	0	49.87	121.2	0	72.37	72.13	3.23	126.02	104.12	10.27	31.51
CCNE1	343.28	161.61	1.64	0	52.11	0	73.19	67.57	161.82	46.25	80.47	0	65.68	52.94	0	12.64	0	70.66	30.33	110.74	0	128.15	10.91	100.94	0	45.68	82.72	0	128.66	74.26	0	17	147.59	147.48	23.06	19.17	199.63	105.52	0	0	44.34	41.92	34.28	76.37	171.41	33.93	0	0	14.01
ITGA1	79.49	124.52	225.32	0	120.98	155.1	41.29	139.97	87.13	23.12	100.87	9.43	28.56	13.81	197.23	22.75	0	54.96	347.13	118.46	12.6	66.94	84.58	52.49	60.05	96.17	61.27	0	68.62	47.09	0	166.58	201.96	102.85	171.7	3.83	21.5	0	0	0	91.64	53.35	7.62	76.37	6.47	4.85	84.03	3.42	49.02
MYOF	91.72	18.55	32.89	0	74.45	105.07	39.41	90.5	211.61	46.25	104.27	94.34	14.28	66.75	164.36	134	0	86.37	121.33	124.9	142.81	15.3	40.93	36.34	112.89	81.74	6.13	0	68.62	134.03	0	78.19	100.98	97.03	143.51	80.51	52.21	25.74	65.08	64.82	70.95	38.11	79.98	12.73	9.7	46.04	45.67	71.89	42.02
TM9SF3	88.22	29.14	74.01	0	29.78	37.52	31.91	36.2	124.48	50.1	61.2	132.08	22.85	32.22	117.4	108.72	0	11.78	181.99	104.3	21	93.72	27.28	109.01	96.07	103.38	101.1	0	94.35	130.41	0	118.99	251.16	194.05	58.94	23	49.14	28.31	125.15	109.7	50.25	49.54	49.51	144.26	103.49	53.31	67.59	65.05	28.01
FABP5	65.51	15.9	75.65	0	1.86	15.01	63.81	56.71	0	42.39	256.14	0	25.7	25.32	230.11	5.06	1077.59	70.66	43.81	6.44	4.2	15.3	201.91	8.08	208.96	4.81	3.06	0	205.86	14.49	0	0	103.57	17.46	64.07	0	214.99	2.57	0	69.81	0	0	11.43	46.67	3.23	43.62	18.27	0	3.5
PXDN	47.17	2.65	116.77	0	0	120.08	414.77	0	0	3.85	112.2	0	65.68	4.6	23.48	101.13	0	19.63	188.73	153.23	0	36.34	109.14	84.79	141.71	21.64	30.64	0	162.97	347.76	0	20.4	706.87	114.49	33.31	11.5	6.14	0	0	4.99	2.96	129.57	30.47	8.49	48.51	135.71	142.48	54.78	31.51
JUN	6.11	0	42.76	0	18.61	27.52	56.3	57.92	0	0	57.8	396.25	0	0	42.26	40.45	0	78.52	313.43	0	336.01	15.3	5.46	0	0	36.06	0	0	0	3.62	0	203.98	157.94	60.16	164.01	46.01	24.57	0	320.38	9.97	26.61	0	0	0	229.62	0	221.03	0	367.67
NRIP1	62.89	0	32.89	0	102.37	85.06	103.22	25.34	0	107.91	146.21	226.43	85.67	98.98	23.48	161.81	0	51.04	117.96	126.19	25.2	101.37	68.21	145.35	81.66	151.46	6.13	0	8.58	362.25	0	84.99	204.55	227.04	58.94	72.85	89.07	118.39	75.09	0	183.28	133.38	57.13	84.86	71.15	147.83	23.75	119.82	7
SQLE	48.92	98.03	199	0	67	65.04	48.8	207.54	62.24	84.79	11.33	0	88.53	59.85	258.28	60.68	0	74.59	178.62	173.83	256.21	107.11	90.04	32.3	60.05	96.17	30.64	0	94.35	90.56	0	108.79	194.19	124.19	174.26	61.34	58.35	36.03	210.25	4.99	94.6	45.73	41.9	16.97	16.17	29.08	171.71	136.94	0
CCR1	183.43	143.06	14.8	0	160.06	32.52	210.2	136.35	136.92	46.25	168.87	169.82	79.96	46.04	46.96	10.11	0	70.66	16.85	123.62	58.8	57.38	70.94	40.38	160.92	158.67	88.85	0	145.82	54.34	0	101.99	116.52	95.09	89.69	34.51	113.64	18.02	145.17	34.91	17.74	11.43	128.52	8.49	45.28	2.42	52.97	78.74	70.03
BLVRB	63.77	82.13	41.12	1064.96	31.64	0	90.08	41.02	0	104.06	62.34	0	39.98	101.28	9.39	78.38	0	23.55	43.81	29.62	58.8	101.37	0	60.56	91.27	134.63	73.53	0	102.93	54.34	0	10.2	36.25	40.75	58.94	115.02	0	141.55	120.14	149.6	348.82	80.03	91.41	110.31	323.41	9.69	94.99	65.05	17.51
DUSP4	41.05	7.95	1.64	0	31.64	142.59	138.88	39.82	248.95	0	6.8	103.78	25.7	16.11	0	30.34	0	133.48	16.85	112.03	0	237.16	0	121.13	177.74	259.65	238.97	0	0	34.41	1044.93	17	10.36	27.17	17.94	61.34	36.86	177.58	95.11	59.84	32.52	34.3	95.22	135.77	74.38	33.93	126.04	126.67	56.03
BBX	74.25	2.65	41.12	0	117.26	60.04	22.52	18.1	0	34.69	105.4	113.21	39.98	98.98	150.27	106.19	0	66.74	101.11	87.56	79.8	53.55	221.01	36.34	64.85	62.51	116.42	0	171.55	163.01	0	115.59	100.98	128.07	115.32	76.68	205.78	123.54	150.18	224.39	121.2	99.08	79.98	195.17	45.28	142.98	51.15	109.55	59.53
CHID1	27.95	50.34	21.38	1064.96	16.75	17.51	71.32	43.44	12.45	7.71	53.27	37.74	105.66	43.73	51.66	35.4	0	11.78	37.07	36.05	75.6	101.37	62.75	12.11	26.42	31.25	88.85	0	42.89	48.9	0	61.19	51.79	34.93	66.63	80.51	276.42	79.78	120.14	79.78	38.43	95.27	95.22	76.37	109.96	307.77	120.56	30.81	42.02
PEA15	82.98	84.78	78.94	0	83.75	95.06	69.44	90.5	136.92	38.54	53.27	18.87	5.71	41.43	173.75	207.32	0	54.96	242.65	149.37	21	74.59	87.31	48.45	33.63	57.7	165.44	0	137.24	191.99	0	84.99	354.73	223.16	84.57	65.18	46.07	108.09	15.02	144.61	47.3	110.51	129.5	29.7	12.94	33.93	27.4	65.05	80.54
ANTXR1	67.26	198.7	277.95	0	174.95	82.55	67.56	300.44	0	23.12	243.68	28.3	39.98	4.6	695.02	48.04	0	43.18	765.03	167.4	92.4	61.2	125.51	8.08	110.49	19.23	0	0	51.46	14.49	0	254.98	170.89	83.44	276.76	0	33.78	5.15	0	99.73	180.32	30.49	19.04	0	3.23	4.85	16.44	0	0
PSG11	2.62	2.65	6.58	0	0	0	0	0	0	0	0	9.43	0	59.85	164.36	907.67	0	0	13.48	0	869.43	0	0	0	0	19.23	3.06	187.02	0	97.81	0	1886.82	227.85	73.74	317.77	0	0	0	0	184.5	0	3.81	3.81	114.56	242.56	9.69	0	0	0
ACSL4	129.28	66.23	106.9	0	87.48	105.07	155.77	176.16	99.58	26.98	90.67	198.12	51.4	43.73	333.42	136.53	0	66.74	235.91	110.74	71.4	82.24	43.66	68.64	120.09	9.62	58.21	0	446.02	175.69	0	132.59	220.09	195.99	153.76	161.03	36.86	92.65	90.11	14.96	70.95	15.24	79.98	97.59	48.51	29.08	120.56	222.53	66.53
C14orf1	159.85	84.78	129.93	0	40.95	82.55	106.98	191.85	261.4	23.12	47.6	56.61	57.12	105.88	70.44	113.77	0	82.44	148.29	137.78	390.62	68.85	130.97	104.98	38.43	153.87	36.76	0	154.39	88.75	0	220.98	69.91	104.79	146.07	76.68	208.85	43.75	125.15	99.73	260.14	38.11	99.03	63.64	97.02	65.43	98.64	0	31.51
RTN4	118.8	129.82	131.57	0	217.76	130.09	30.03	102.56	112.03	73.23	83.87	150.95	97.1	39.13	150.27	141.59	0	125.63	279.72	126.19	0	116.67	95.5	24.23	40.83	96.17	61.27	0	94.35	460.06	0	152.99	468.66	261.97	76.88	57.51	36.86	23.16	0	109.7	109.38	201.98	91.41	84.86	100.26	9.69	78.55	95.86	17.51
SYPL1	122.29	119.22	93.75	0	122.84	35.02	157.65	162.89	112.03	11.56	344.55	56.61	71.39	128.9	61.05	116.3	0	66.74	155.03	110.74	84	101.37	90.04	84.79	7.21	151.46	79.66	0	60.04	170.26	0	101.99	121.7	97.03	120.44	49.84	52.21	66.91	0	84.77	47.3	53.35	76.17	80.61	210.21	249.61	186.32	71.89	192.59
SLC2A3	17.47	2.65	1.64	0	0	222.65	91.96	0	99.58	169.58	0	226.43	2.86	9.21	4.7	20.23	0	19.63	13.48	100.44	63	11.48	5.46	88.83	50.44	0	0	0	17.15	83.32	0	3.4	5.18	182.41	25.63	176.37	15.36	288.25	160.19	279.24	5.91	217.22	472.28	216.39	436.6	60.58	250.25	160.91	31.51
CYP26A1	5.24	2.65	23.03	0	3.72	447.8	18.77	0	12.45	0	0	9.43	0	43.73	0	37.92	0	0	16.85	3.86	327.61	3.83	297.4	0	0	0	0	748.08	17.15	0	0	581.34	0	32.99	307.52	23	3.07	123.54	1051.26	134.64	5.91	3.81	0	0	97.02	2.42	1.83	51.35	49.02
CEBPD	70.75	42.39	57.56	0	89.34	67.54	131.37	161.68	136.92	65.52	89.54	367.95	22.85	138.11	61.05	298.34	0	31.41	151.66	178.98	79.8	212.3	117.32	84.79	345.87	240.42	156.25	0	42.89	338.7	0	142.79	349.55	242.57	69.19	26.84	95.21	120.96	115.14	59.84	56.17	3.81	110.45	0	48.51	92.09	168.05	3.42	154.07
TSC22D3	152.86	68.88	108.55	0	52.11	107.57	105.1	252.18	174.27	53.96	12.47	18.87	97.1	170.33	32.87	78.38	0	54.96	60.66	77.26	121.8	114.76	182.81	209.95	69.65	50.49	113.36	0	385.98	68.83	0	98.59	191.61	67.92	89.69	3.83	36.86	2.57	5.01	4.99	20.69	240.08	586.54	93.34	42.04	75.12	10.96	277.31	812.37
IDH1	173.83	259.63	74.01	0	152.62	45.03	157.65	234.08	174.27	134.89	222.14	0	217.04	223.27	108.01	45.51	0	259.1	53.92	242.08	42	160.66	291.95	157.46	134.5	170.7	110.29	0	240.17	52.53	0	91.79	119.11	135.84	87.13	111.19	242.63	66.91	0	74.8	189.19	129.57	129.5	72.13	12.94	121.17	149.79	82.16	21.01
SOCS3	96.08	71.53	23.03	0	61.42	40.03	302.16	150.83	311.19	57.81	45.34	103.78	174.2	0	244.2	353.97	0	94.22	168.51	157.09	75.6	185.52	122.78	109.01	67.25	110.59	229.78	0	85.77	83.32	0	10.2	494.55	261.97	25.63	3.83	3.07	87.5	205.25	144.61	0	11.43	278.03	0	12.94	70.28	47.49	17.12	129.56
SOD3	96.96	82.13	315.77	0	72.59	67.54	93.84	33.78	124.48	30.83	126.94	37.74	34.27	20.72	140.88	523.36	0	74.59	205.58	55.37	50.4	11.48	54.57	24.23	110.49	16.83	21.45	187.02	34.31	423.83	0	91.79	937.31	211.52	46.13	38.34	86	10.29	190.23	84.77	0	11.43	38.09	4.24	32.34	142.98	87.68	6.85	112.05
RNASET2	67.26	166.91	18.09	0	81.89	5	140.76	138.76	161.82	142.6	82.74	122.65	22.85	11.51	9.39	106.19	0	274.81	57.29	139.07	4.2	120.49	120.05	60.56	14.41	52.89	140.93	0	34.31	342.33	0	17	64.73	248.39	58.94	115.02	208.85	120.96	325.39	0	32.52	3.81	79.98	0	38.81	1095.36	9.13	0	126.06
ST3GAL5	85.6	270.23	324	0	282.9	160.11	97.59	120.66	24.9	7.71	95.2	0	122.8	121.99	262.98	78.38	0	416.14	586.41	97.86	138.61	47.82	693.03	44.41	458.76	52.89	12.25	374.04	188.7	170.26	0	105.39	398.75	203.76	138.38	7.67	0	0	5.01	154.58	62.08	3.81	3.81	93.34	6.47	7.27	403.69	0	3.5
POMC	80.36	50.34	18.09	0	40.95	110.07	18.77	48.26	74.69	30.83	129.21	122.65	117.09	0	61.05	22.75	0	94.22	40.44	27.04	79.8	89.89	35.47	0	28.82	358.22	6.13	0	274.48	144.9	0	27.2	36.25	176.59	105.07	149.53	307.13	311.41	340.41	1406.2	23.65	11.43	0	0	517.45	312.61	593.67	78.74	315.14
CDH1	75.99	172.21	100.32	0	206.59	232.65	236.47	184.61	236.5	185	326.41	122.65	199.9	50.64	314.64	42.98	0	192.37	478.57	182.85	159.61	110.93	275.58	165.54	235.38	230.8	61.27	0	180.12	172.07	0	353.57	346.96	265.85	120.44	92.02	138.21	72.06	410.49	264.29	32.52	15.24	255.18	169.72	203.75	84.82	111.43	6.85	119.05
CLN5	200.9	259.63	212.16	0	506.25	337.72	163.28	399.39	273.85	73.23	266.34	94.34	368.39	257.8	93.92	80.91	0	231.62	138.18	163.53	197.41	156.83	207.36	359.34	158.52	132.23	242.04	0	85.77	124.98	0	343.37	277.05	283.32	294.7	153.36	242.63	337.15	235.28	49.87	130.07	83.84	68.56	127.29	190.81	106.63	162.57	147.21	290.63
PLA2G7	399.19	341.76	1004.88	0	331.29	525.35	266.5	300.44	535.25	724.57	682.3	28.3	336.98	140.41	150.27	189.62	0	294.44	74.14	715.94	403.22	151.1	578.44	359.34	497.19	536.13	713.85	374.04	531.8	262.63	0	877.12	321.07	277.5	499.71	11.5	196.56	231.63	165.2	49.87	576.44	209.6	167.58	610.97	32.34	332	89.51	17.12	91.04
PROCR	917.17	1181.6	981.86	0	1211.64	1300.87	362.22	1212.64	510.35	134.89	1327.19	349.08	811.03	365.98	554.14	207.32	0	1020.72	532.49	1077.77	415.82	424.6	963.15	238.22	855.06	187.52	346.2	0	1012.13	355.01	0	1597.85	1279.09	626.79	1458.14	134.19	1317.58	908.5	180.22	478.71	263.09	15.24	449.43	76.37	122.89	521.02	332.45	20.54	161.07
HSD3B1	429.76	792.15	567.4	0	1537.35	462.81	341.57	1427.41	609.93	697.59	1413.33	226.43	642.55	375.19	479	2389.27	0	973.61	111.22	969.61	252.01	581.43	343.79	383.57	235.38	418.32	677.09	187.02	574.68	2052.15	0	312.77	365.09	601.56	520.22	525.26	1142.52	589.37	825.99	1116.98	168.5	289.63	281.84	123.04	514.22	937.84	949.87	297.85	2867.81
TIMP1	1613.35	1666.43	968.7	0	954.79	105.07	593.06	1426.21	1194.97	666.75	1569.73	594.37	733.93	451.15	1216.28	490.49	0	1036.42	475.2	1033.99	159.61	1612.33	1364.23	226.1	2380.24	1279.02	242.04	374.04	1749.78	467.3	1044.93	329.77	1605.34	481.25	502.28	475.42	1704.56	1546.76	1677	792.86	493.67	57.16	99.03	267.3	1258.05	322.31	453.01	6.85	14.01
GPX3	727.62	680.88	450.63	0	214.04	1080.72	245.86	253.39	248.95	4489.99	164.34	320.77	222.75	308.44	1643.62	45.51	0	149.18	1206.52	423.64	1562.46	369.13	422.91	1158.78	134.5	444.77	1081.5	187.02	566.11	371.31	1044.93	1183.09	222.68	302.72	722.66	448.58	1271.51	272.81	1236.48	767.92	659.21	4858.85	255.18	1735.34	3463.69	2978.32	635.68	2167.1	742.34
CRABP2	800.12	4652.22	2016.34	4259.85	2680.12	107.57	1469.51	2317.89	199.16	115.62	3021.59	28.3	996.66	43.73	1127.06	242.72	1077.59	3749.17	192.1	2680.91	268.81	543.18	3451.51	169.58	1157.7	497.66	566.79	4301.48	3002.08	260.82	0	47.6	1926.41	840.25	627.85	72.85	2109.97	1230.21	40.05	89.76	532.1	403.95	41.9	373.37	213.45	690.66	301.4	95.86	2514.15
IGFBP3	170.33	180.15	5021.12	0	465.3	1370.91	382.86	698.62	124.48	277.49	228.94	792.5	28.56	925.31	920.43	131.47	0	39.26	1573.87	185.42	1797.67	15.3	30.01	2596.14	2656.46	3704.82	1050.86	1496.17	17.15	114.11	0	1482.26	3164.07	60.16	1445.33	816.65	21.5	20.59	1276.53	319.14	594.18	2336.06	377.06	1569.87	1002.56	24.23	2877	7480.42	1159.03
CD59	1512.02	1576.35	1072.21	0	1064.6	1643.59	953.4	1084.74	1045.6	1048.31	1344.19	830.24	1022.36	2483.61	2324.55	2055.53	0	1020.72	1846.86	1346.89	1461.66	1512.88	924.95	1792.67	1323.42	959.26	1200.99	0	1217.99	1646.43	0	1536.65	1214.36	1373.89	1852.79	1426.26	1557.14	1371.76	1526.82	1735.31	1578.56	743.12	677.95	1188.01	895.84	1572.77	1337.12	1229.05	1022.47
[truncated: 46 more columns]
